# Supplementary material for: Ferritinophagy Loss Drives Mitochondrial Iron Import and Colorectal Tumorigenesis
Source: Research Square preprint supplement (doi:10.21203/rs.3.rs-7483419/v1), 2025-09-23
Supplement: Supplementary file 1 [file 1ccf0f50efea31f1089ebcb4.docx]

**Table S2 qPCR primers**

| **qPCR primers** | **SOURCE** | **Sequence** |
| --- | --- | --- |
| 18S_forward | IDT | GTAACCCGTTGAACCCCATT |
| 18S_reverse | IDT | CCATCCAATCGGTAGTAGCG |
| *NCOA4*_forward | IDT | GCAAATATTGGGCCCTTCCT |
| *NCOA4*_reverse | IDT | CAATACCGGATGCTGACTTCTG |
| *Ncoa4*_forward | IDT | TGCCATTGGTCTTCAGGCTCCT |
| *Ncoa4*_reverse | IDT | CAGGCATCGCTGAAGAAACTGC |
| *Tfrc*_forward | IDT | TCAAGCCAGATCAGCATTCTC |
| *Tfrc* _reverse | IDT | AGCCAGTTTCATCTCCACATG |
| *Dmt1*_forward | IDT | TTGGCAATCATTGGTTCTGA |
| *Dmt1*_reverse | IDT | CTTCCGCAAGCCATATTTGT |
| *Steap4*_forward | IDT | CTAGAAGGCAGAGCCCACC |
| *Steap4*_reverse | IDT | GGAAACTCATCTGCATGTGCT |
| *Mcu*_forward | IDT | ACTCACCAGATGGCGTTCG |
| *Mcu* _reverse | IDT | CATGGCTTAGGAGGTCTCTCTT |

**Table S3 Antibodies**

| **Antibody** | **SOURCE** | **Catalog and RRID** |
| --- | --- | --- |
| NCOA4 (human) | Cell Signaling Technology | 66849; AB_3064842 |
| NCOA4 (mouse) | ABclonal | A5695; AB_2766454 |
| FTH1 | Cell Signaling Technology | 3998; AB_1903974 |
| GAPDH | Cell Signaling Technology | 2118; AB_561053 |
| IRP2 | Santa Cruz Biotechnology | sc-33682; AB_2126703 |
| TFRC (human) | Cell Signaling Technology | 13113; AB_2715594 |
| TFRC (mouse) | ABclonal | A5865; AB_2766615 |
| HIF-2a | Santa Cruz Biotechnology | sc-46691; AB_627523 |
| STEAP4 | Proteintech | 11944-1-AP; AB_2197868 |
| DMT1 | Proteintech | 20507-1-AP; AB_10694284 |
| MCU | ABclonal | A22525; AB_3712073 |
| p-CREB1 | Proteintech | 28792-1-AP; AB_2918203 |
| CREB1 | Proteintech | 12208-1-AP; AB_2245417 |
| p-AMPK | Cell Signaling Technology | 2531; RRID: AB_330330 |
| AMPK | Cell Signaling Technology | 2532; RRID: RRID: AB_330331 |
| p-STAT3 | Cell Signaling Technology | 9145; AB_2491009 |
| STAT3 | Cell Signaling Technology | 12640; AB_2629499 |
| ATG5 | Cell Signaling Technology | 12994; AB_2630393 |
| ATG16L | Cell Signaling Technology | 8089; AB_10950320 |
| P62 | Santa Cruz Biotechnology | sc-48402; AB_2255371 |
| LC3II/I | Cell Signaling Technology | 12741; AB_2617131 |
| LC3I | MBL Life Science | PM036; AB_2274121 |
| LC3II | Cell Signaling Technology | 2775; AB_915950 |
| p-S6K | Santa Cruz Biotechnology | sc-377529; AB_3712072 |
| β-Actin | Santa Cruz Biotechnology | sc-47778; AB_626632 |
| 4-HNE | Biotechne | MAB3249; AB_664165 |
| NQO1 | Santa Cruz Biotechnology | sc-32793; AB_628036 |
| xCT | Proteintech | 26864-1-AP; AB_2880661 |
| GPX4 | Cell Signaling Technology | 52455; AB_2924984 |
