# Supplementary material for: Ferritinophagy Loss Drives Mitochondrial Iron Import and Colorectal Tumorigenesis
Source: Research Square preprint supplement (doi:10.21203/rs.3.rs-7483419/v1), 2025-09-23
Supplement: Supplementary file 2 [file 5237d5f51999adbadb780db0.docx]

**Supplementary Figures**

**
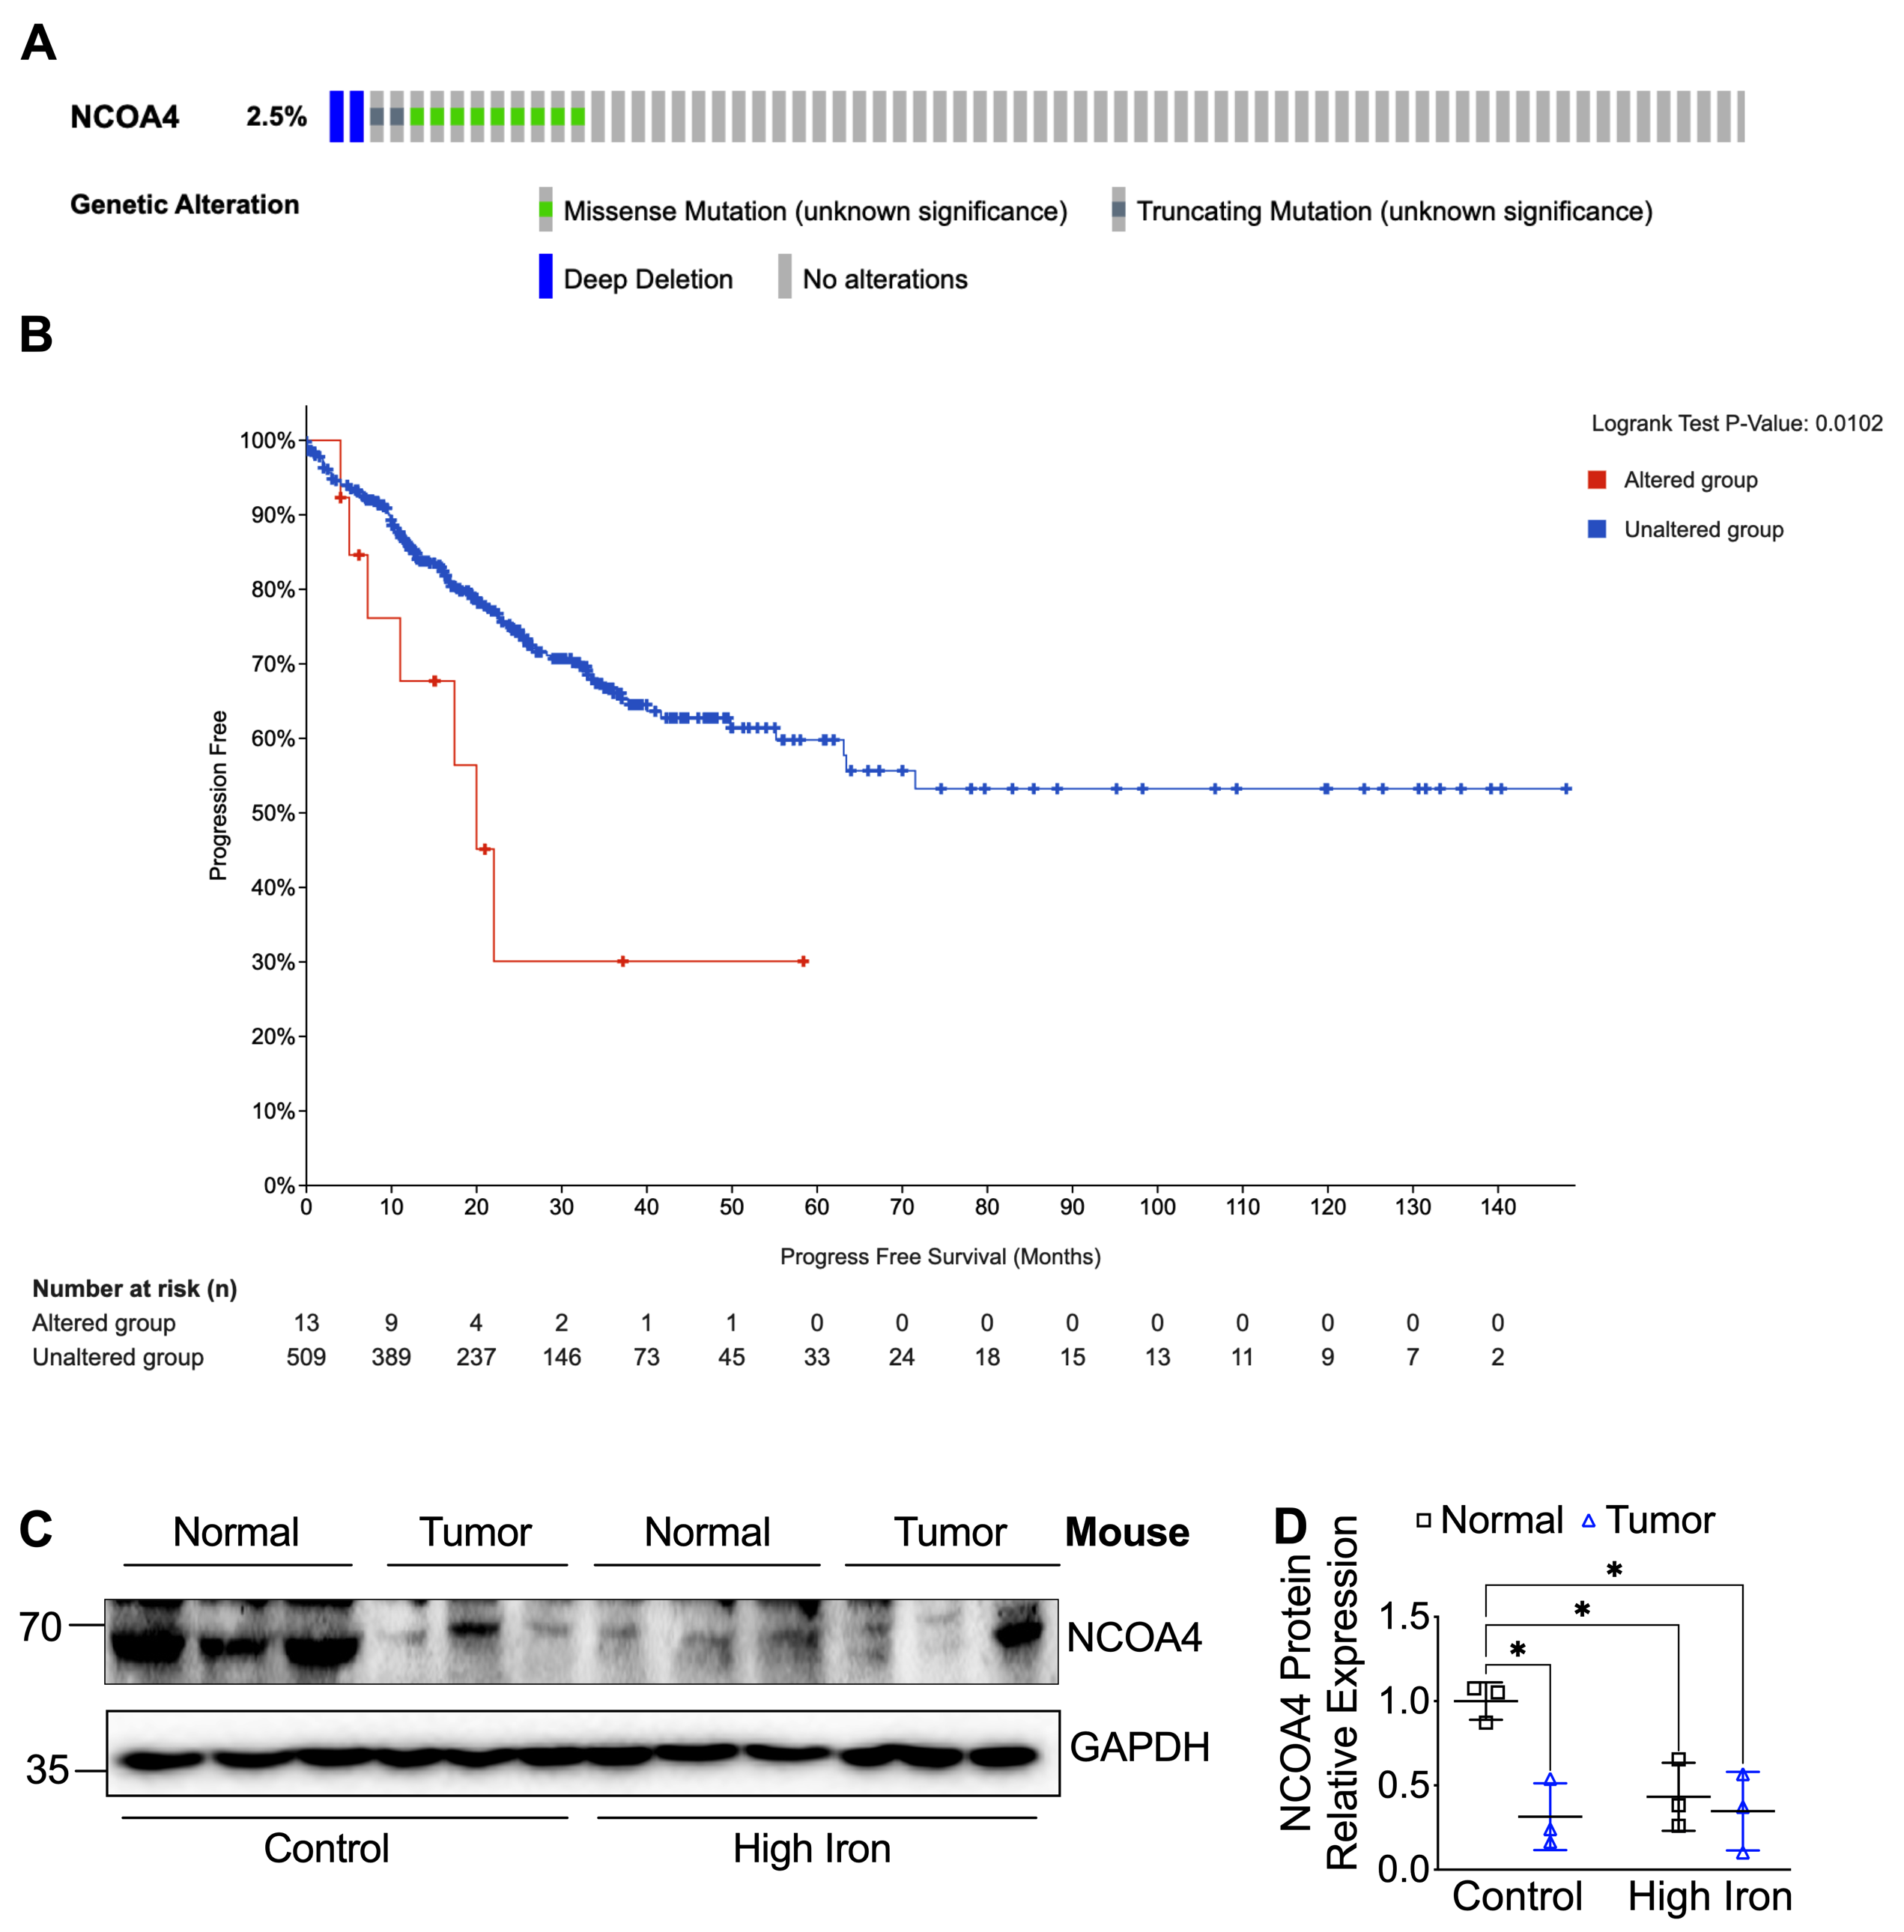
**

**Figure S1. Analysis of NCOA4 mutations and expression in colorectal adenocarcinoma and mouse colon tumors.** (**A**) Frequency and types of NCOA4 alterations in colorectal cancer (CRC) samples (n = 526) from the TCGA PanCancer Atlas dataset analyzed via cBioPortal, showing approximately 2.5% (13 cases) harbor missense mutations, truncations, or deep deletions. (**B**) Kaplan–Meier plot comparing progression-free survival between CRC patients with and without NCOA4 mutations, revealing significantly poorer survival in the mutation group (p = 0.0102). (**C**) Representative immunoblot and (**D**) quantification of NCOA4 protein levels in normal (n = 3) and tumor (n = 3) colon tissues from *Cdx2*Cre-ERT2 *Apc*F/+ mice fed control (40 ppm) or high iron (1000 ppm) diets. *p < 0.05 by two-way ANOVA with Sidak’s multiple comparisons test.


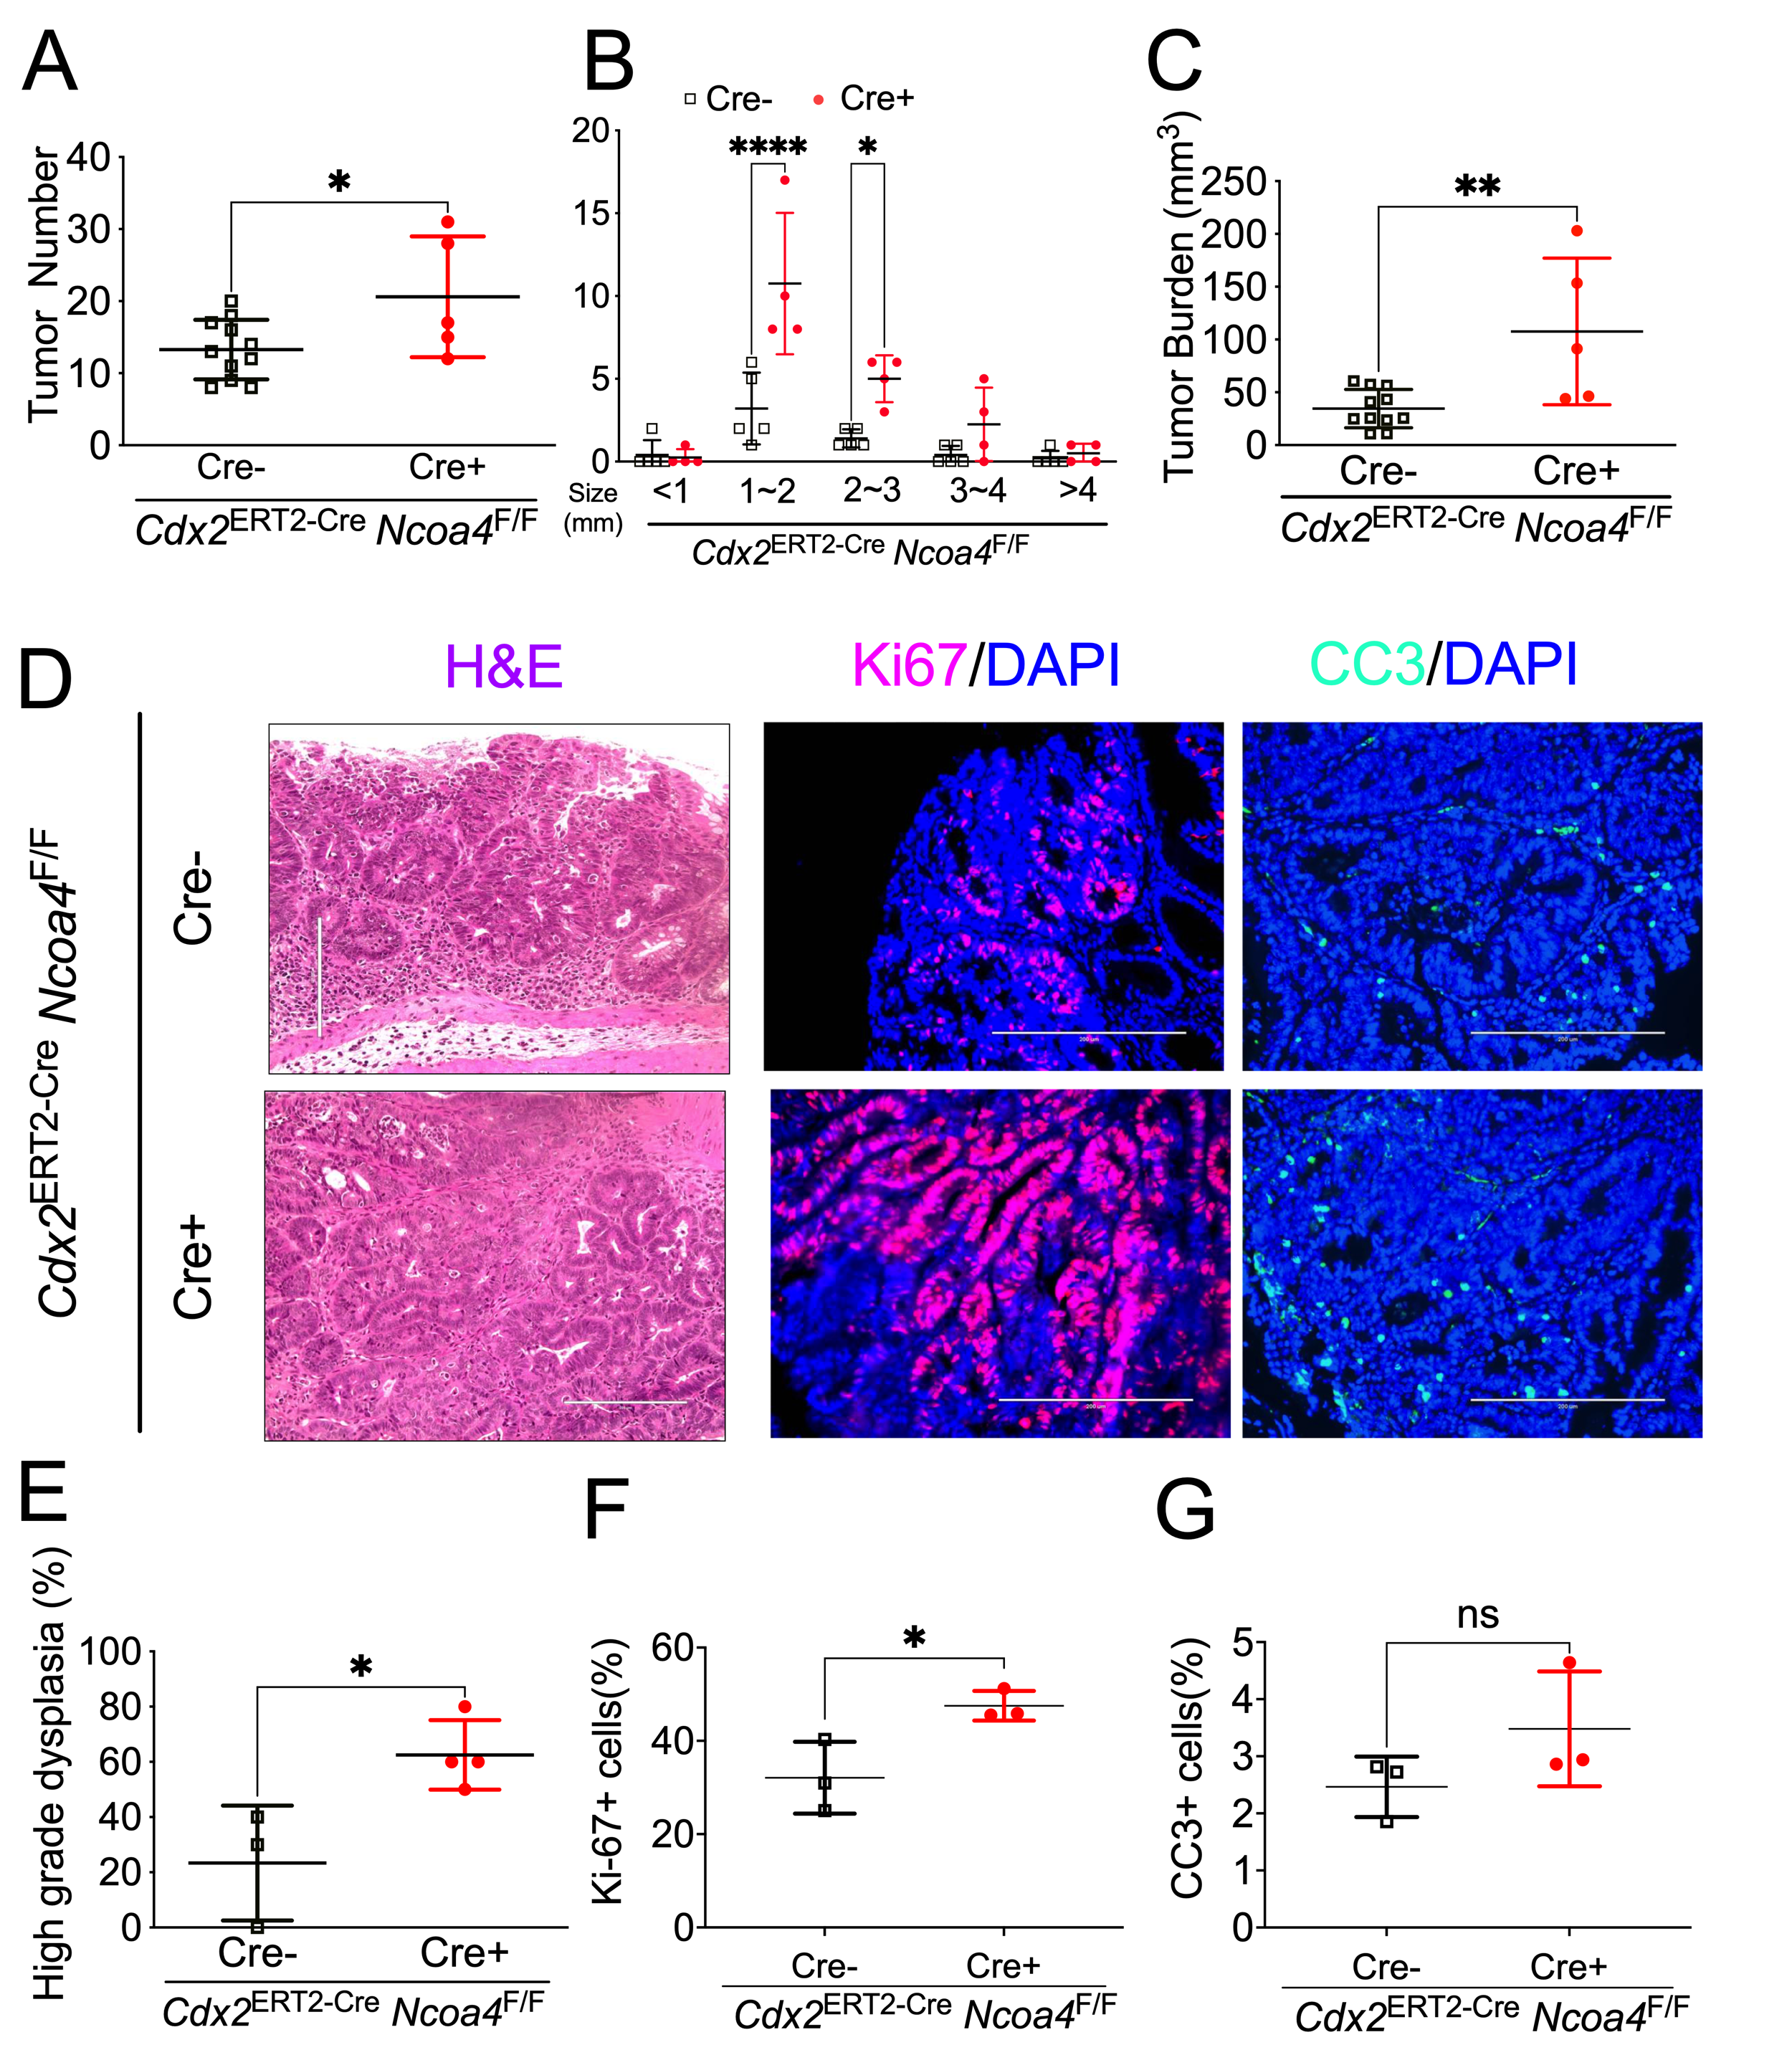


**Figure S2. Colon-specific NCOA4 knockout increases colitis-associated colon tumorigenesis.** (**A**) Tumor number, (**B**) tumor number based on size, (**C**) tumor burden, (**D**) histological staining, and quantification of (**E**) high-grade dysplasia percentage, (**F**) Ki67 positive cell percentage, and (**G**) cleaved caspase 3 (CC3) positive cell percentage in *Ncoa4*F/F mice (Cre−, n = 3–11) and *Cdx2*ERT2-Cre *Ncoa4*F/F mice (Cre+, n = 3–5) treated with the azoxymethane/DSS protocol. *p < 0.05, **p < 0.01; ****p < 0.0001; NS, not significant (unpaired Student’s t-test).

**
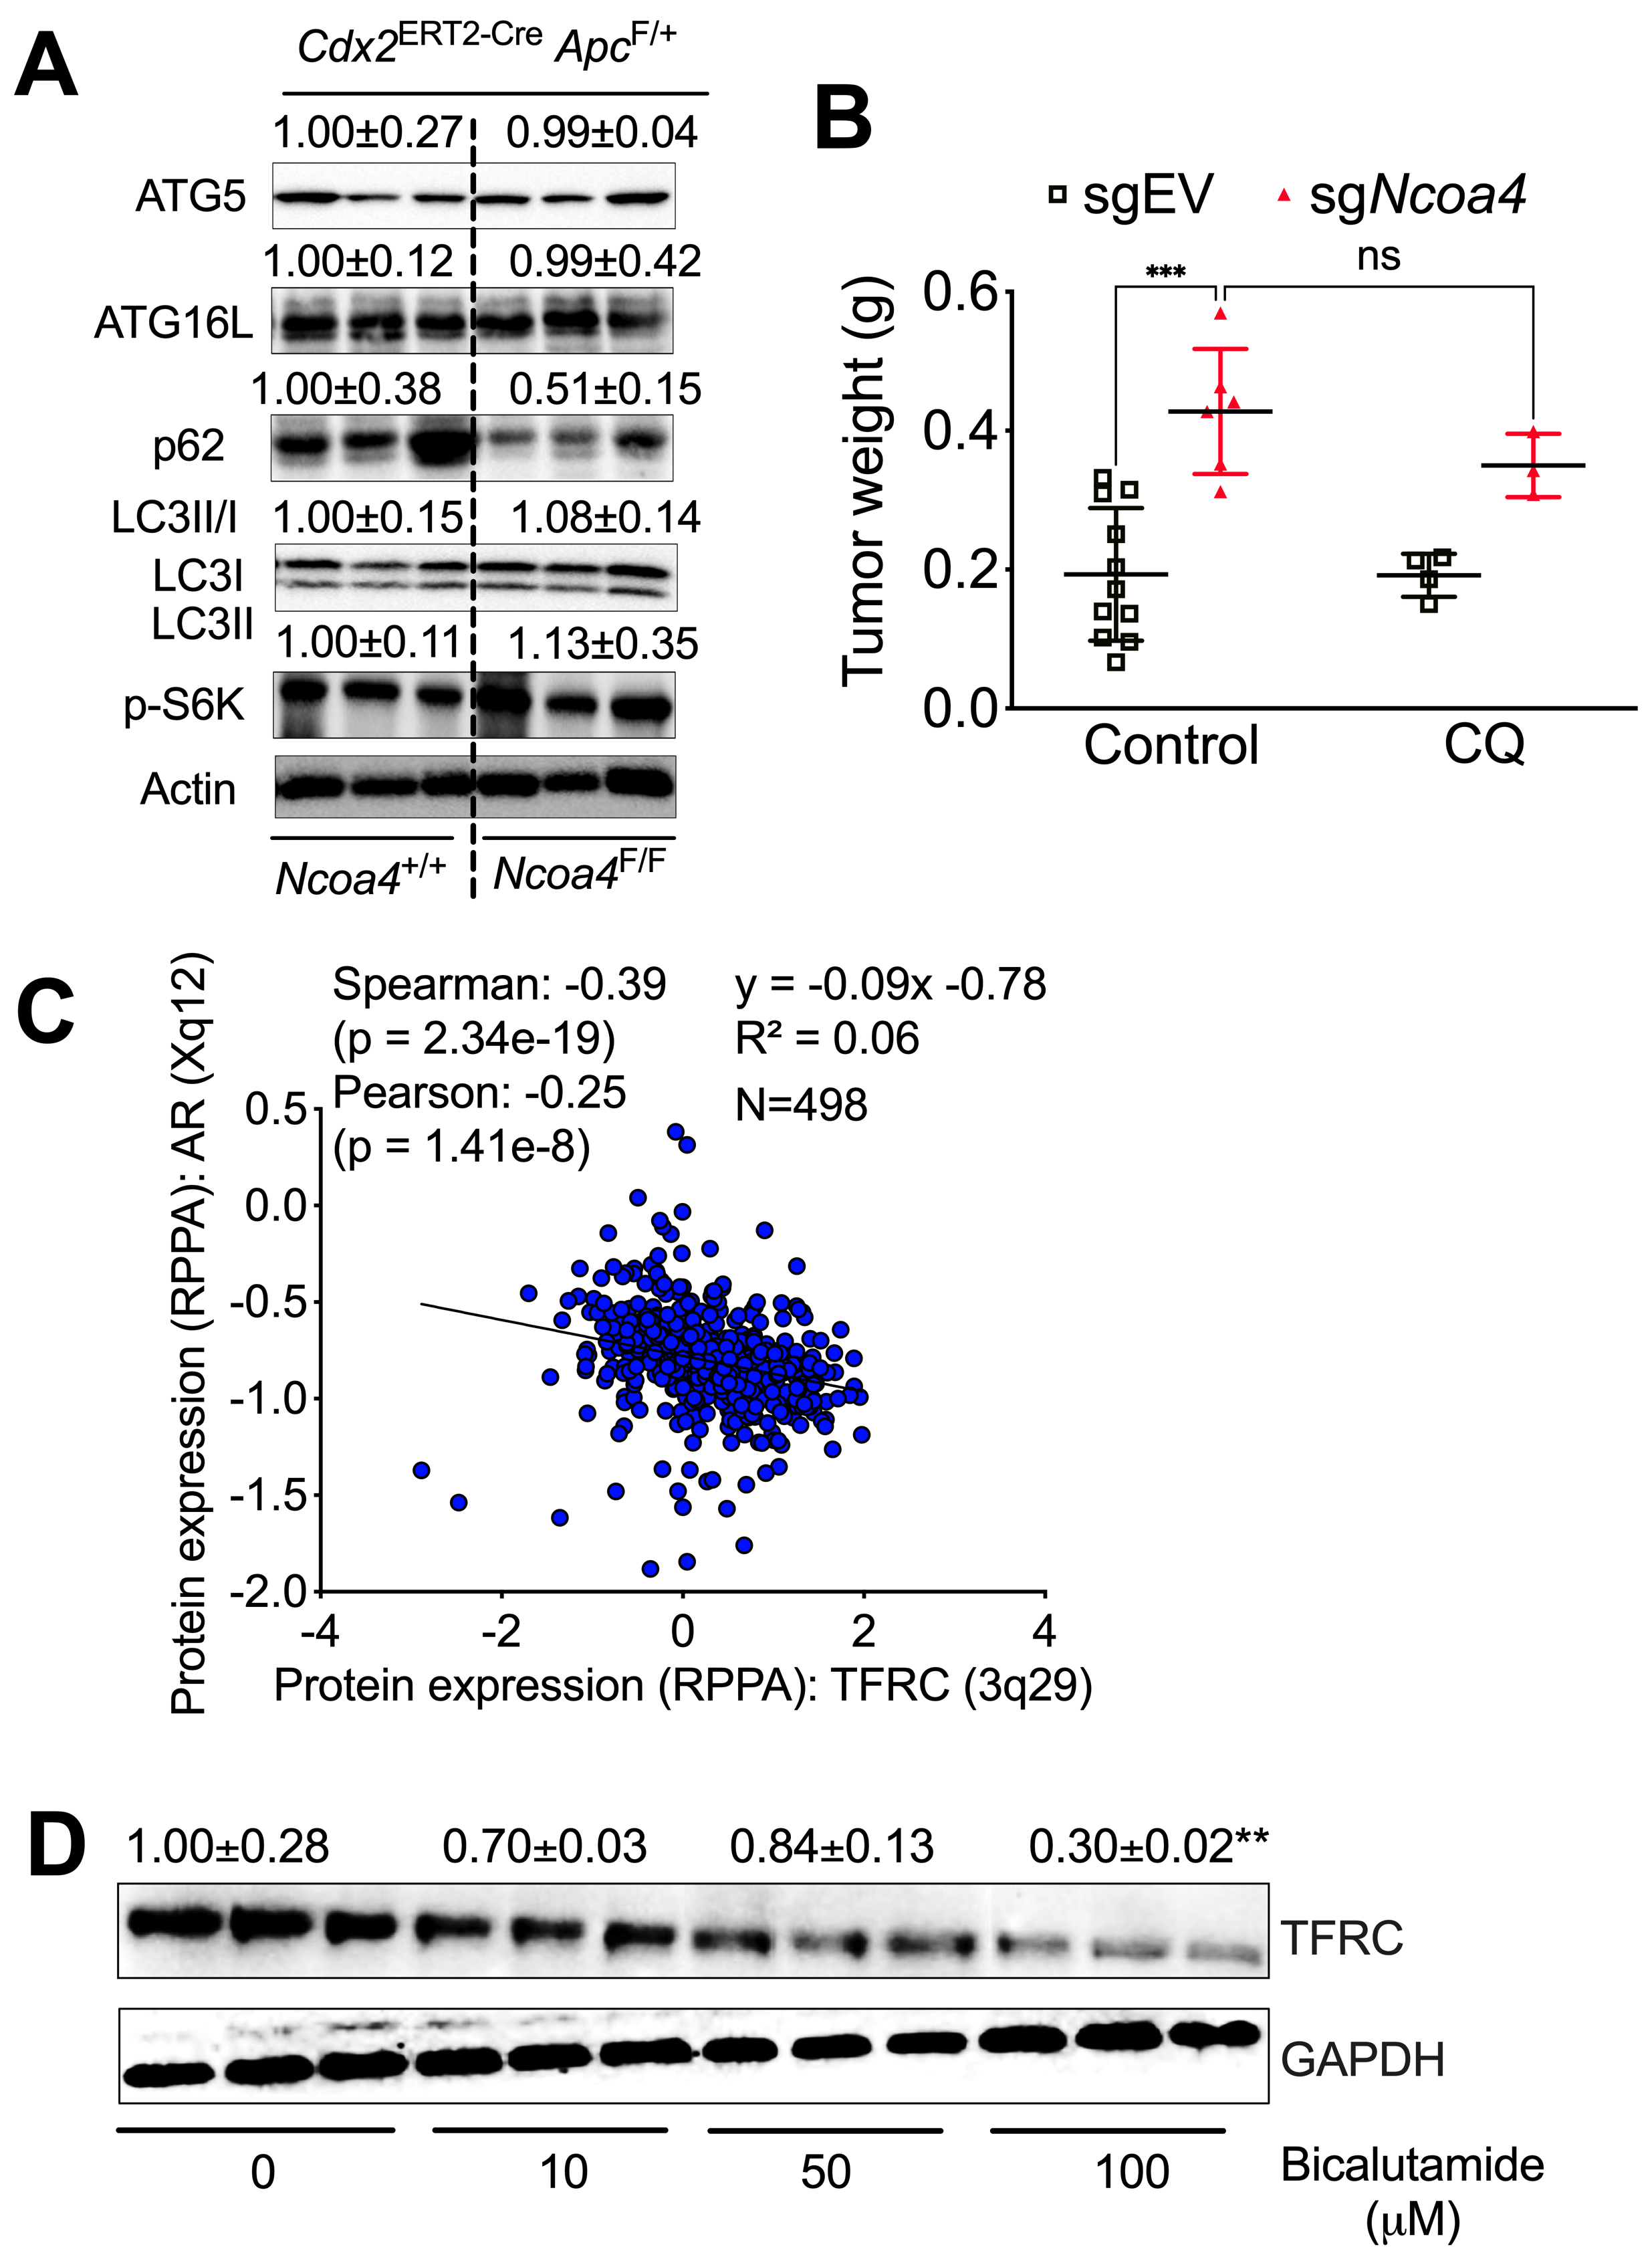
**

**Figure S3. NCOA4 depletion does not change autophagy related proteins in**

**colon tumors and NCOA4 depletion increased TFRC is not due to the loss of the androgen receptor co-activator activity.** (**A**) Immunoblot analysis of autophagy related

proteins in mouse colon tumor tissues. (**B**) Tumor weights (n = 3–11) of xenograft tumors derived from mouse MC38 stable sgEV and sg*Ncoa4* cells in C57BL/6 mice treated with i.p. injection of vehicle control or Chloroquine (CQ, Sigma-Aldrich) at 60 mg/kg bodyweight in 0.9% NaCl-solution for one week. (**C**) Correlation analysis of TFRC with AR using the TCGA colorectal adenocarcinoma dataset from the cBioPortal platform. (**D**) Immunoblot analysis in human HCT116 cells treated with AR antagonist Bicalutamide overnight. Data above the bands are mean and SD. **p<0.01; ***p<0.001, ns, not significant. Statistical analysis: A, Student’s t-test; B, two-way ANOVA followed by Sidak’s multiple comparisons test; C, one-way ANOVA followed by Dunnett's multiple comparisons test.

**
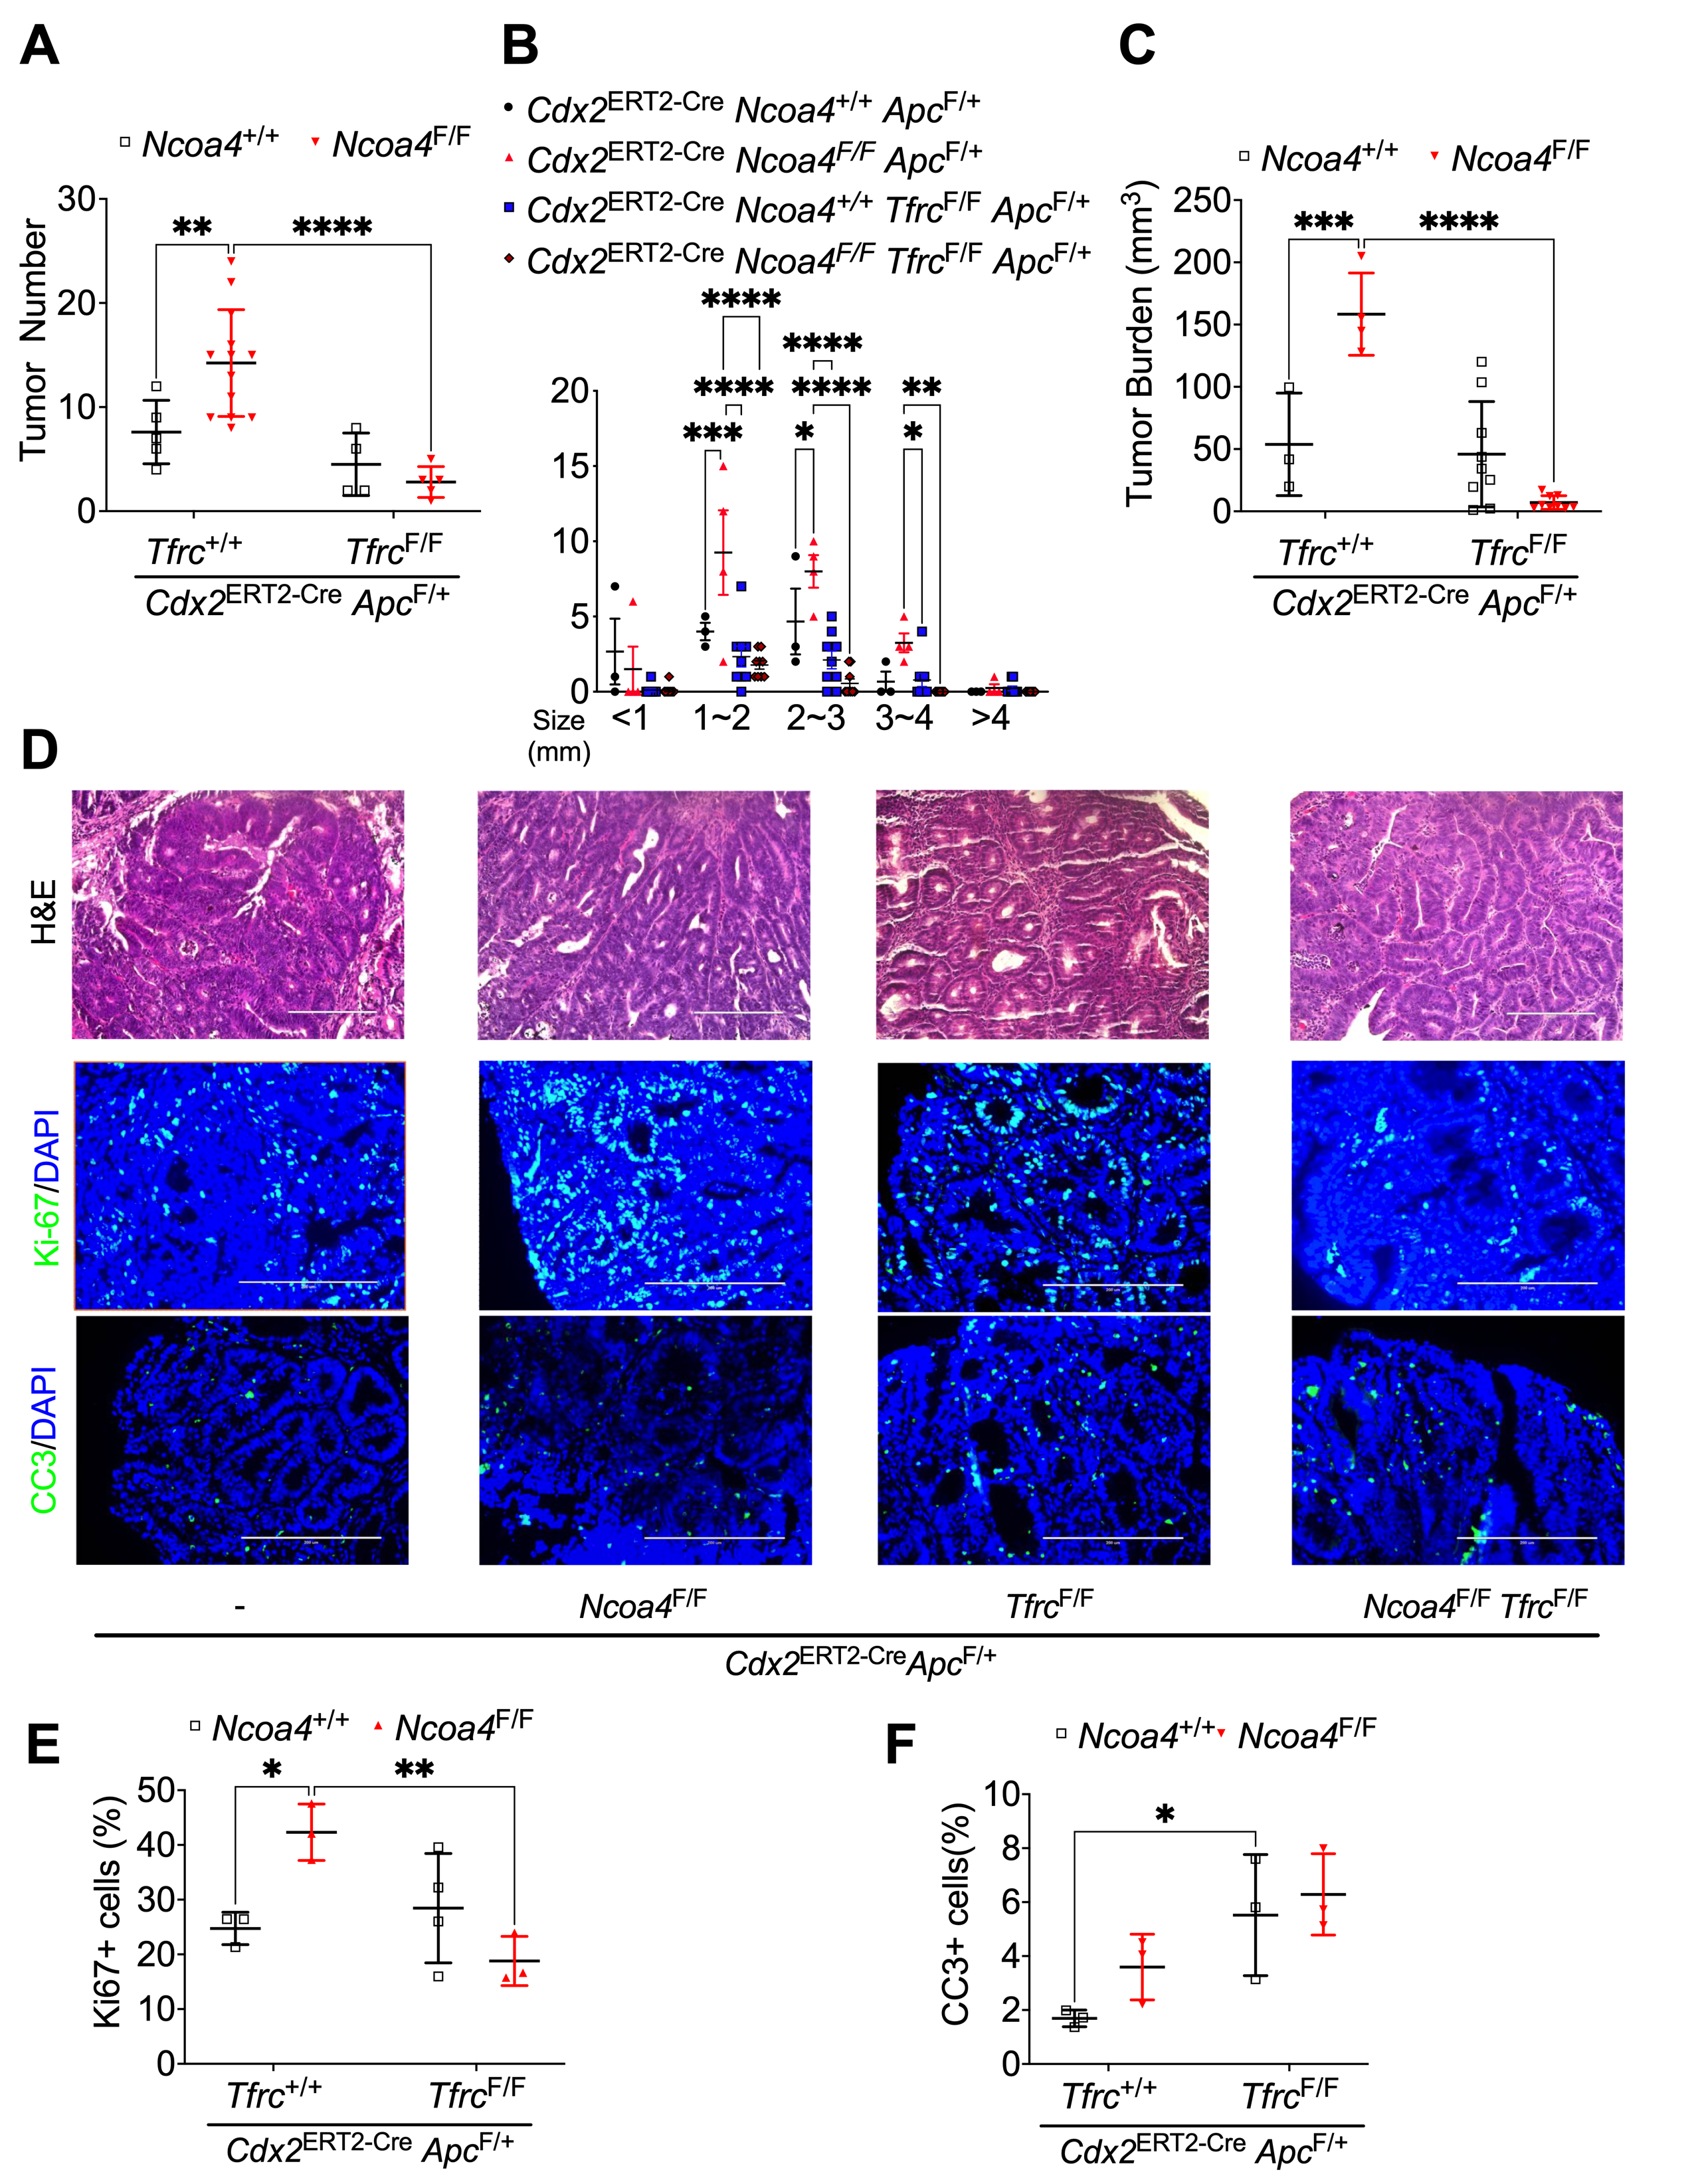
**

**Figure S4. TFRC depletion abolishes NCOA4 knockout-induced tumorigenesis.**
(**A**) Tumor number, (**B**) tumor number by size, (**C**) tumor burden, (**D**) representative histological images, and quantification of (**E**) Ki-67+ cells and (**F**) cleaved caspase 3 (CC3)+ cells from colon tumors of colon-specific NCOA4 and TFRC double knockout mice and parental lines (*Cdx2*ERT2-Cre *Apc*F/+, *Cdx2*ERT2-Cre *Tfrc*F/F *Apc*F/+ and *Cdx2*ERT2-Cre *Ncoa4*F/F *Apc*F/+). *p < 0.05, **p < 0.01, ***p < 0.001, ****p < 0.0001. Two-way ANOVA with Sidak’s multiple comparisons test for A–C, E, and F.


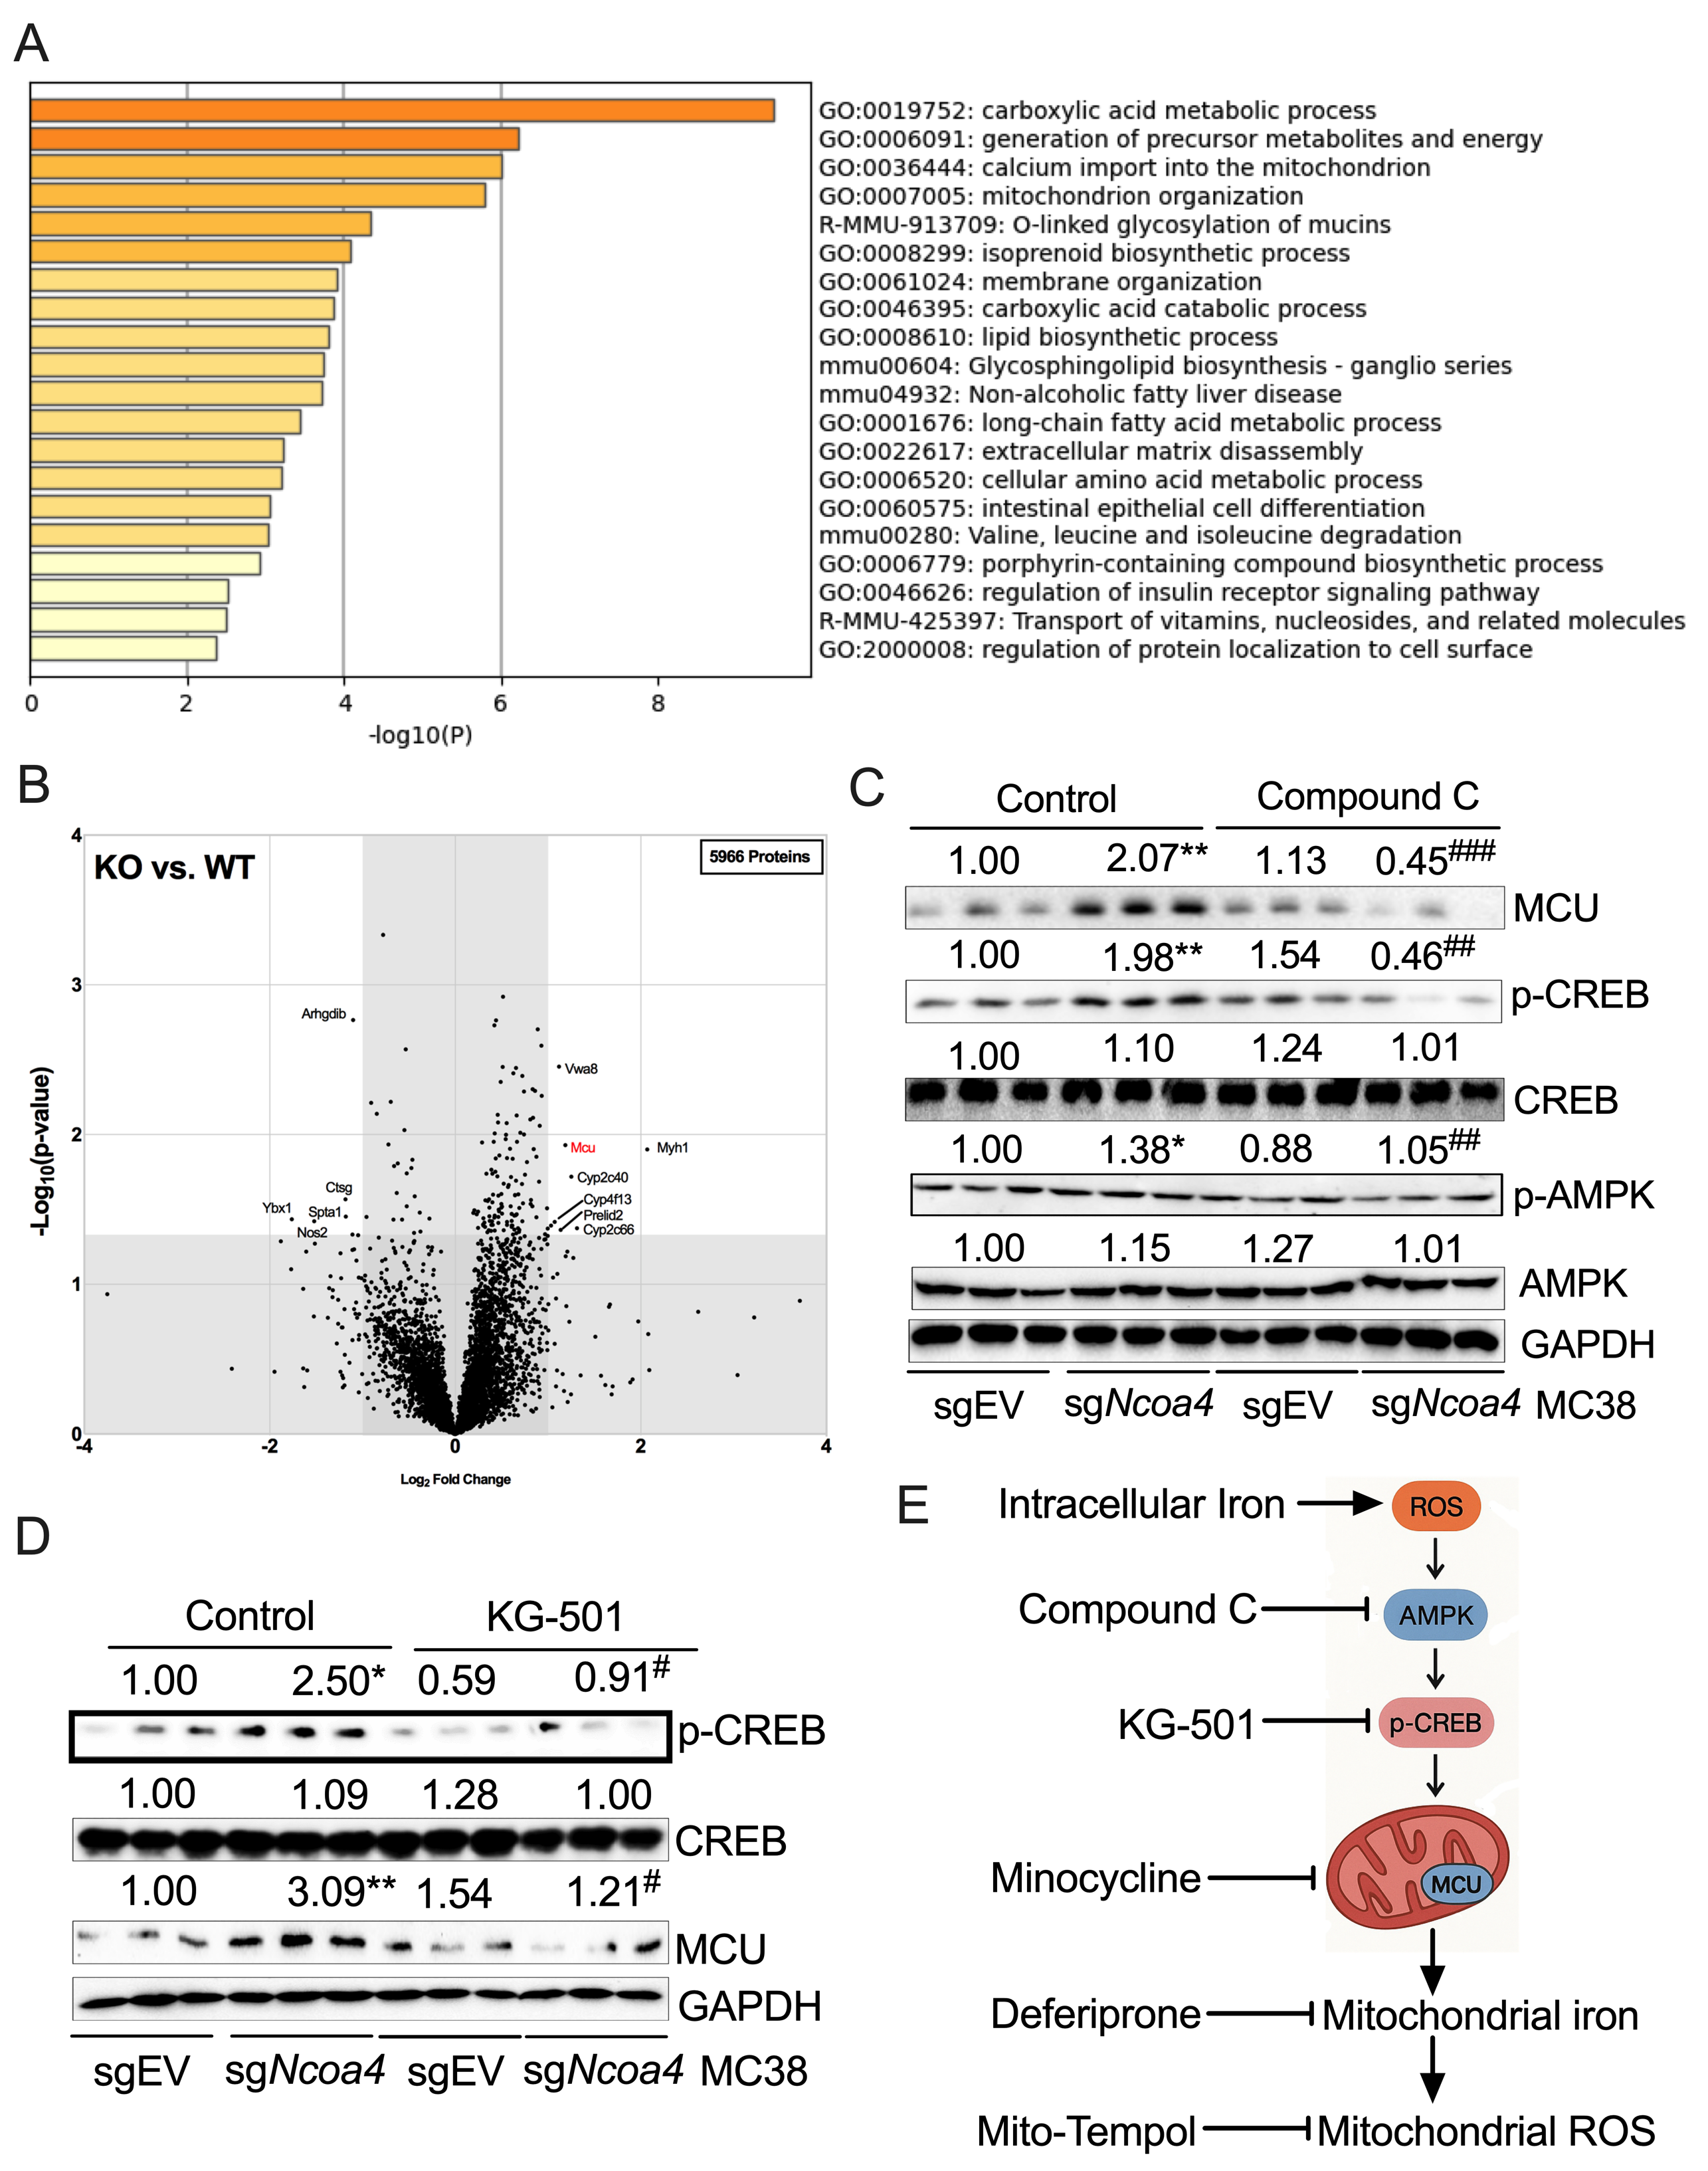


**Figure S5. AMPK-CREB signaling pathway is required for the MCU induction in NCOA4 knockout cells.** (**A**) Bar graph of the top 20 enriched terms across input gene lists visualized by Metascape, colored by p-values, (**B**) Volcano plot from untargeted quantitative proteomics analysis showing significant upregulation of *Mcu* (highlighted in red) in colon tissues from NCOA4 knockout (KO) mice compared to wild-type (WT) controls. Immunoblotting analysisin murine MC38 NCOA4 knockout and their wildtype control cells (n=3) in the presence or absence of (**C**) compound C (**D**) KG-501. Values above blots are mean. *p<0.05, **p<0.01 vs untreated sgEV, #p<0.05, ##p<0.01, ###p<0.001 vs untreated sg*Ncoa4*. Unpaired Student t test. (**E**) Schematic diagram summarizing the intracellular iron–mitochondrial ROS signaling cascade. Increased intracellular iron promotes ROS production, which activates AMPK. AMPK in turn enhances CREB phosphorylation, leading to upregulation of the mitochondrial calcium uniporter (MCU). MCU facilitates mitochondrial iron accumulation, resulting in elevated mitochondrial ROS. Pharmacological inhibitors used in the study include Compound C (AMPK inhibitor), KG-501 (CREB inhibitor), Minocycline (MCU inhibitor), and Mito-Tempol (mitochondrial ROS scavenger).


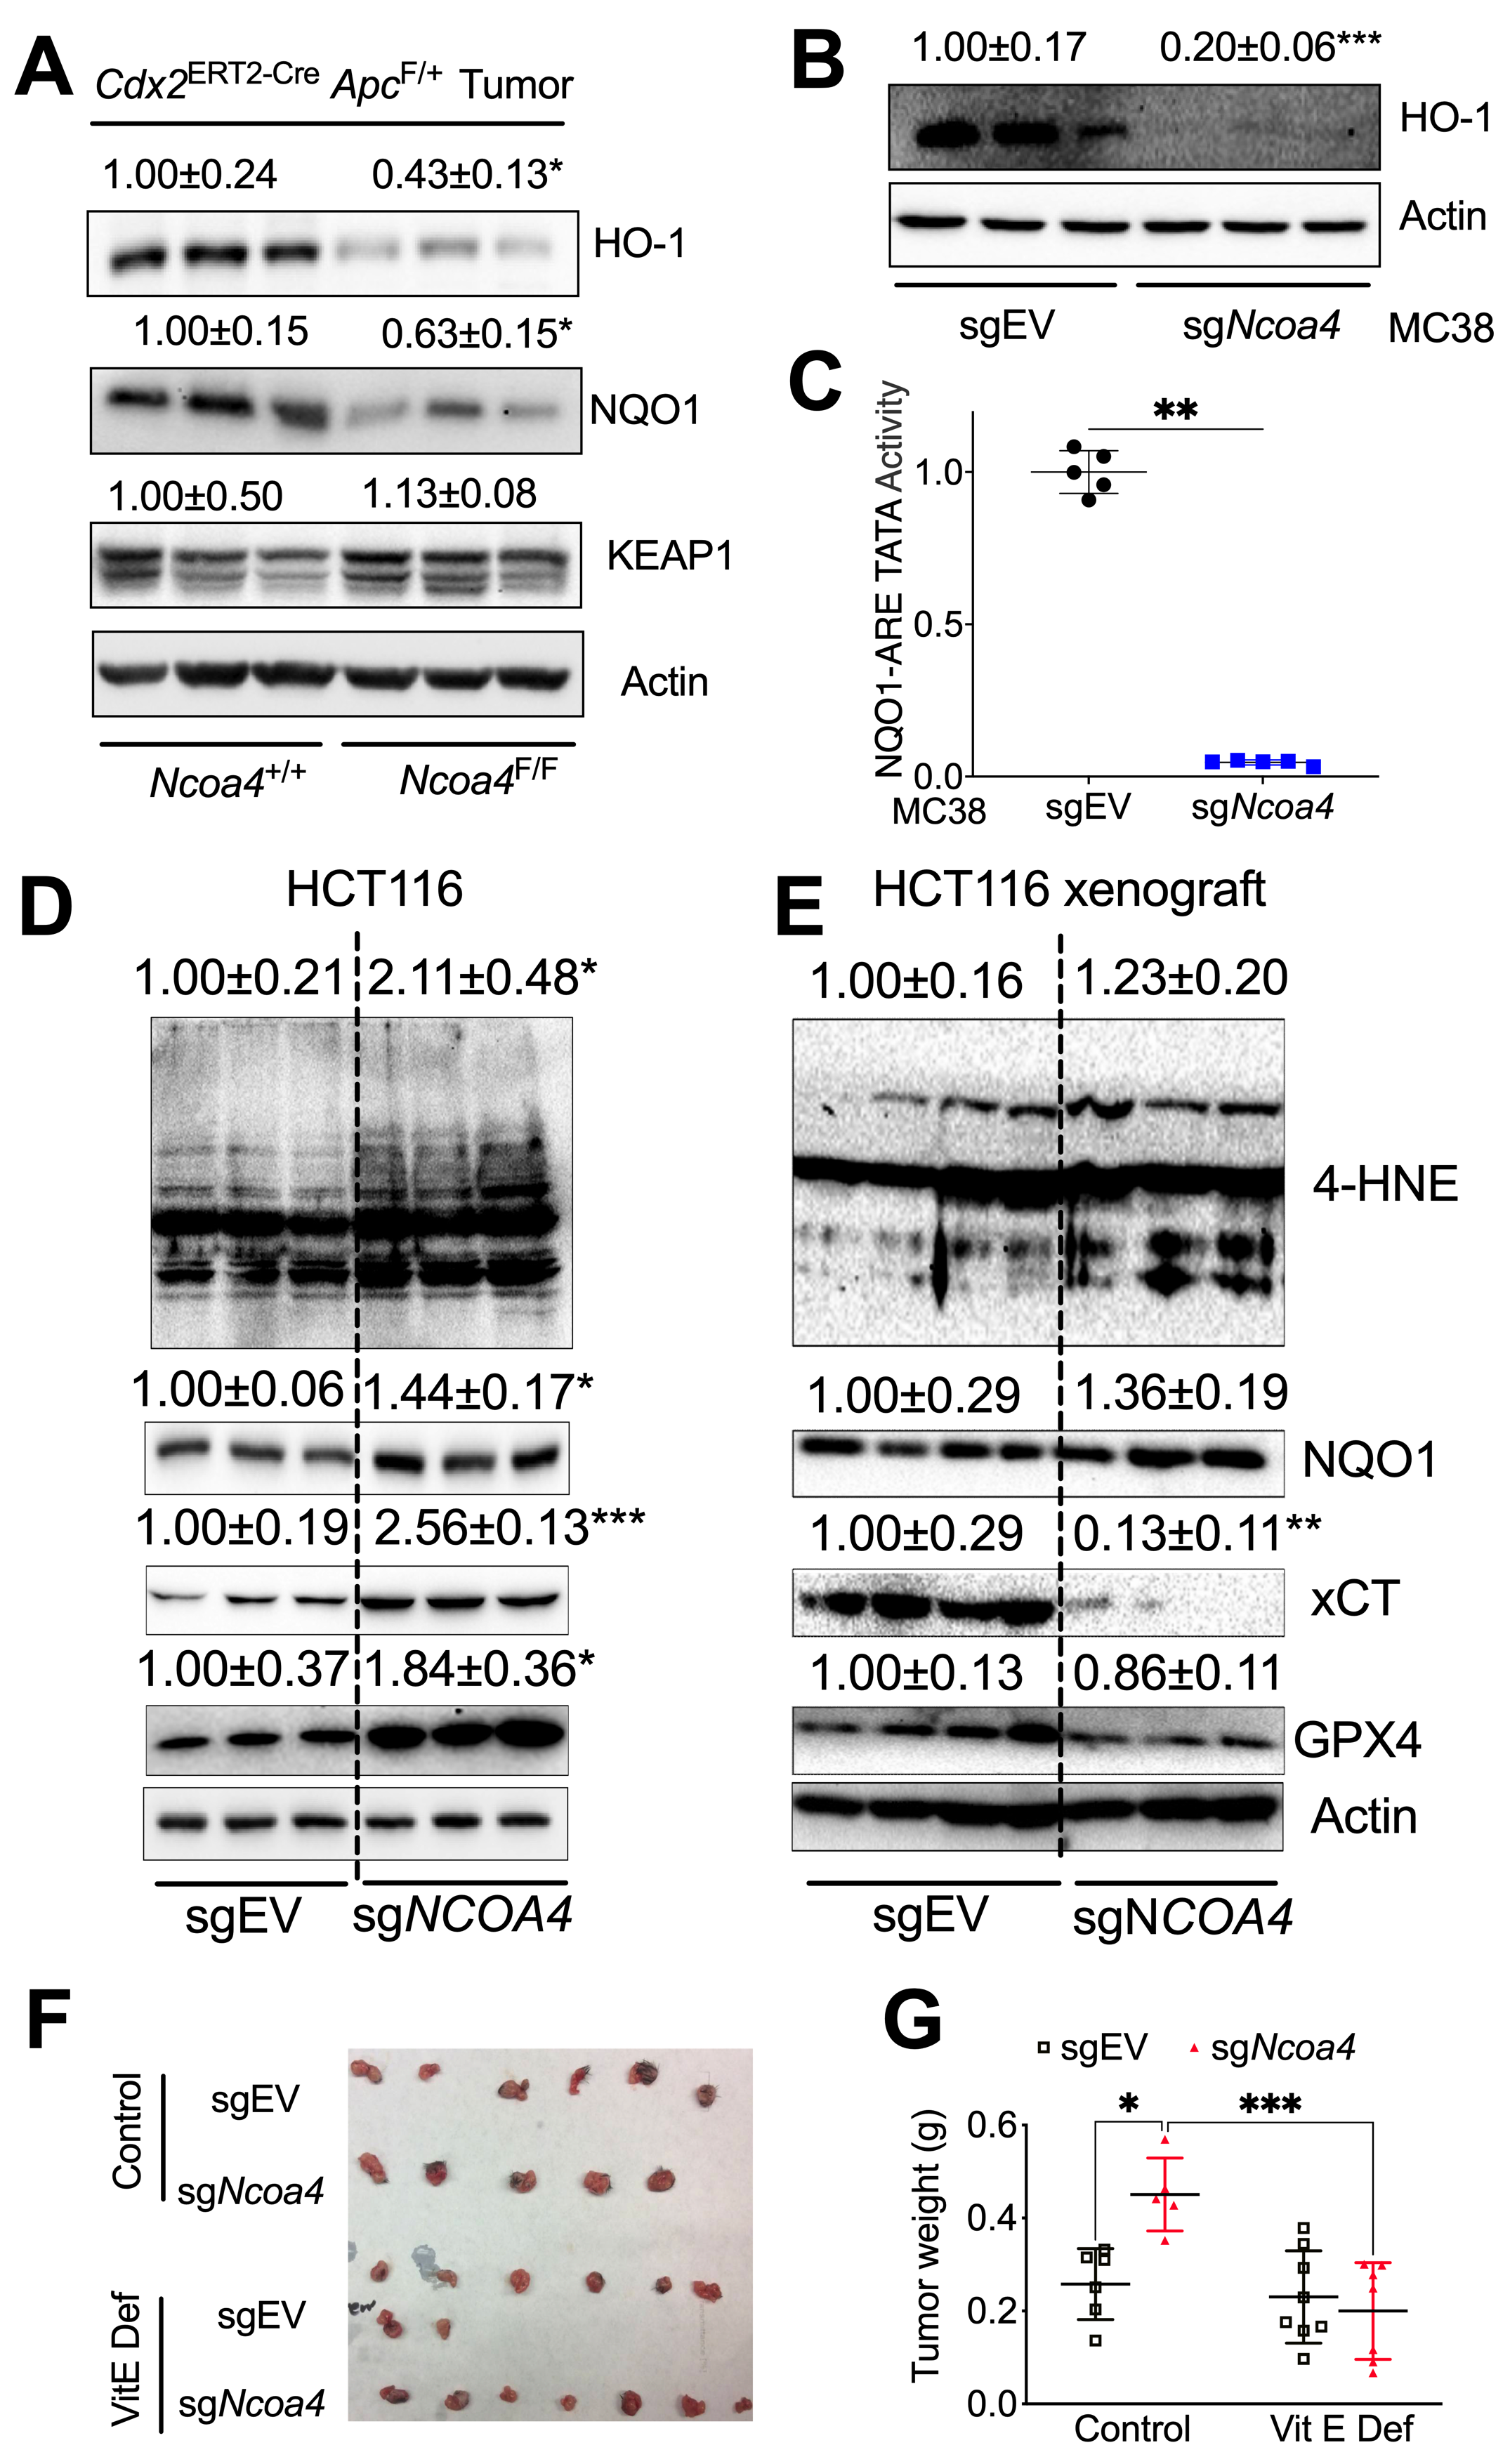


**Figure S6. NCOA4 deficiency suppresses NRF2 signaling and enhances oxidative stress in colorectal cancer.** (**A**) Immunoblot analysis of colon tumors from *Cdx2*ERT2-Cre *Ncoa4*F/F*Apc*F/+ mice (n = 3) and control littermates (n = 3).(**B**) Immunoblot analysis and (**C**) NQO1 antioxidant response element (ARE) promoter luciferase assay in MC38 sg*Ncoa4* cells (n = 5) and WT controls (n = 5). (**D**) Immunoblot analysis of oxidative stress marker proteins in HCT116 cells.(**E**) Immunoblot analysis of oxidative stress marker proteins in xenograft tumor tissues.(**F**) Representative images and (**G**) tumor weights (n = 5–8) of xenograft tumors derived from MC38 stable sgEV or sg*Ncoa4* cells in C57BL/6 mice fed a control or vitamin E–deficient diet for one week.Data above the bands are mean ± SD. *p < 0.05, **p < 0.01, ***p < 0.001.Statistical analysis: A-E, Student’s t-test; G, two-way ANOVA followed by Sidak’s multiple comparisons test.


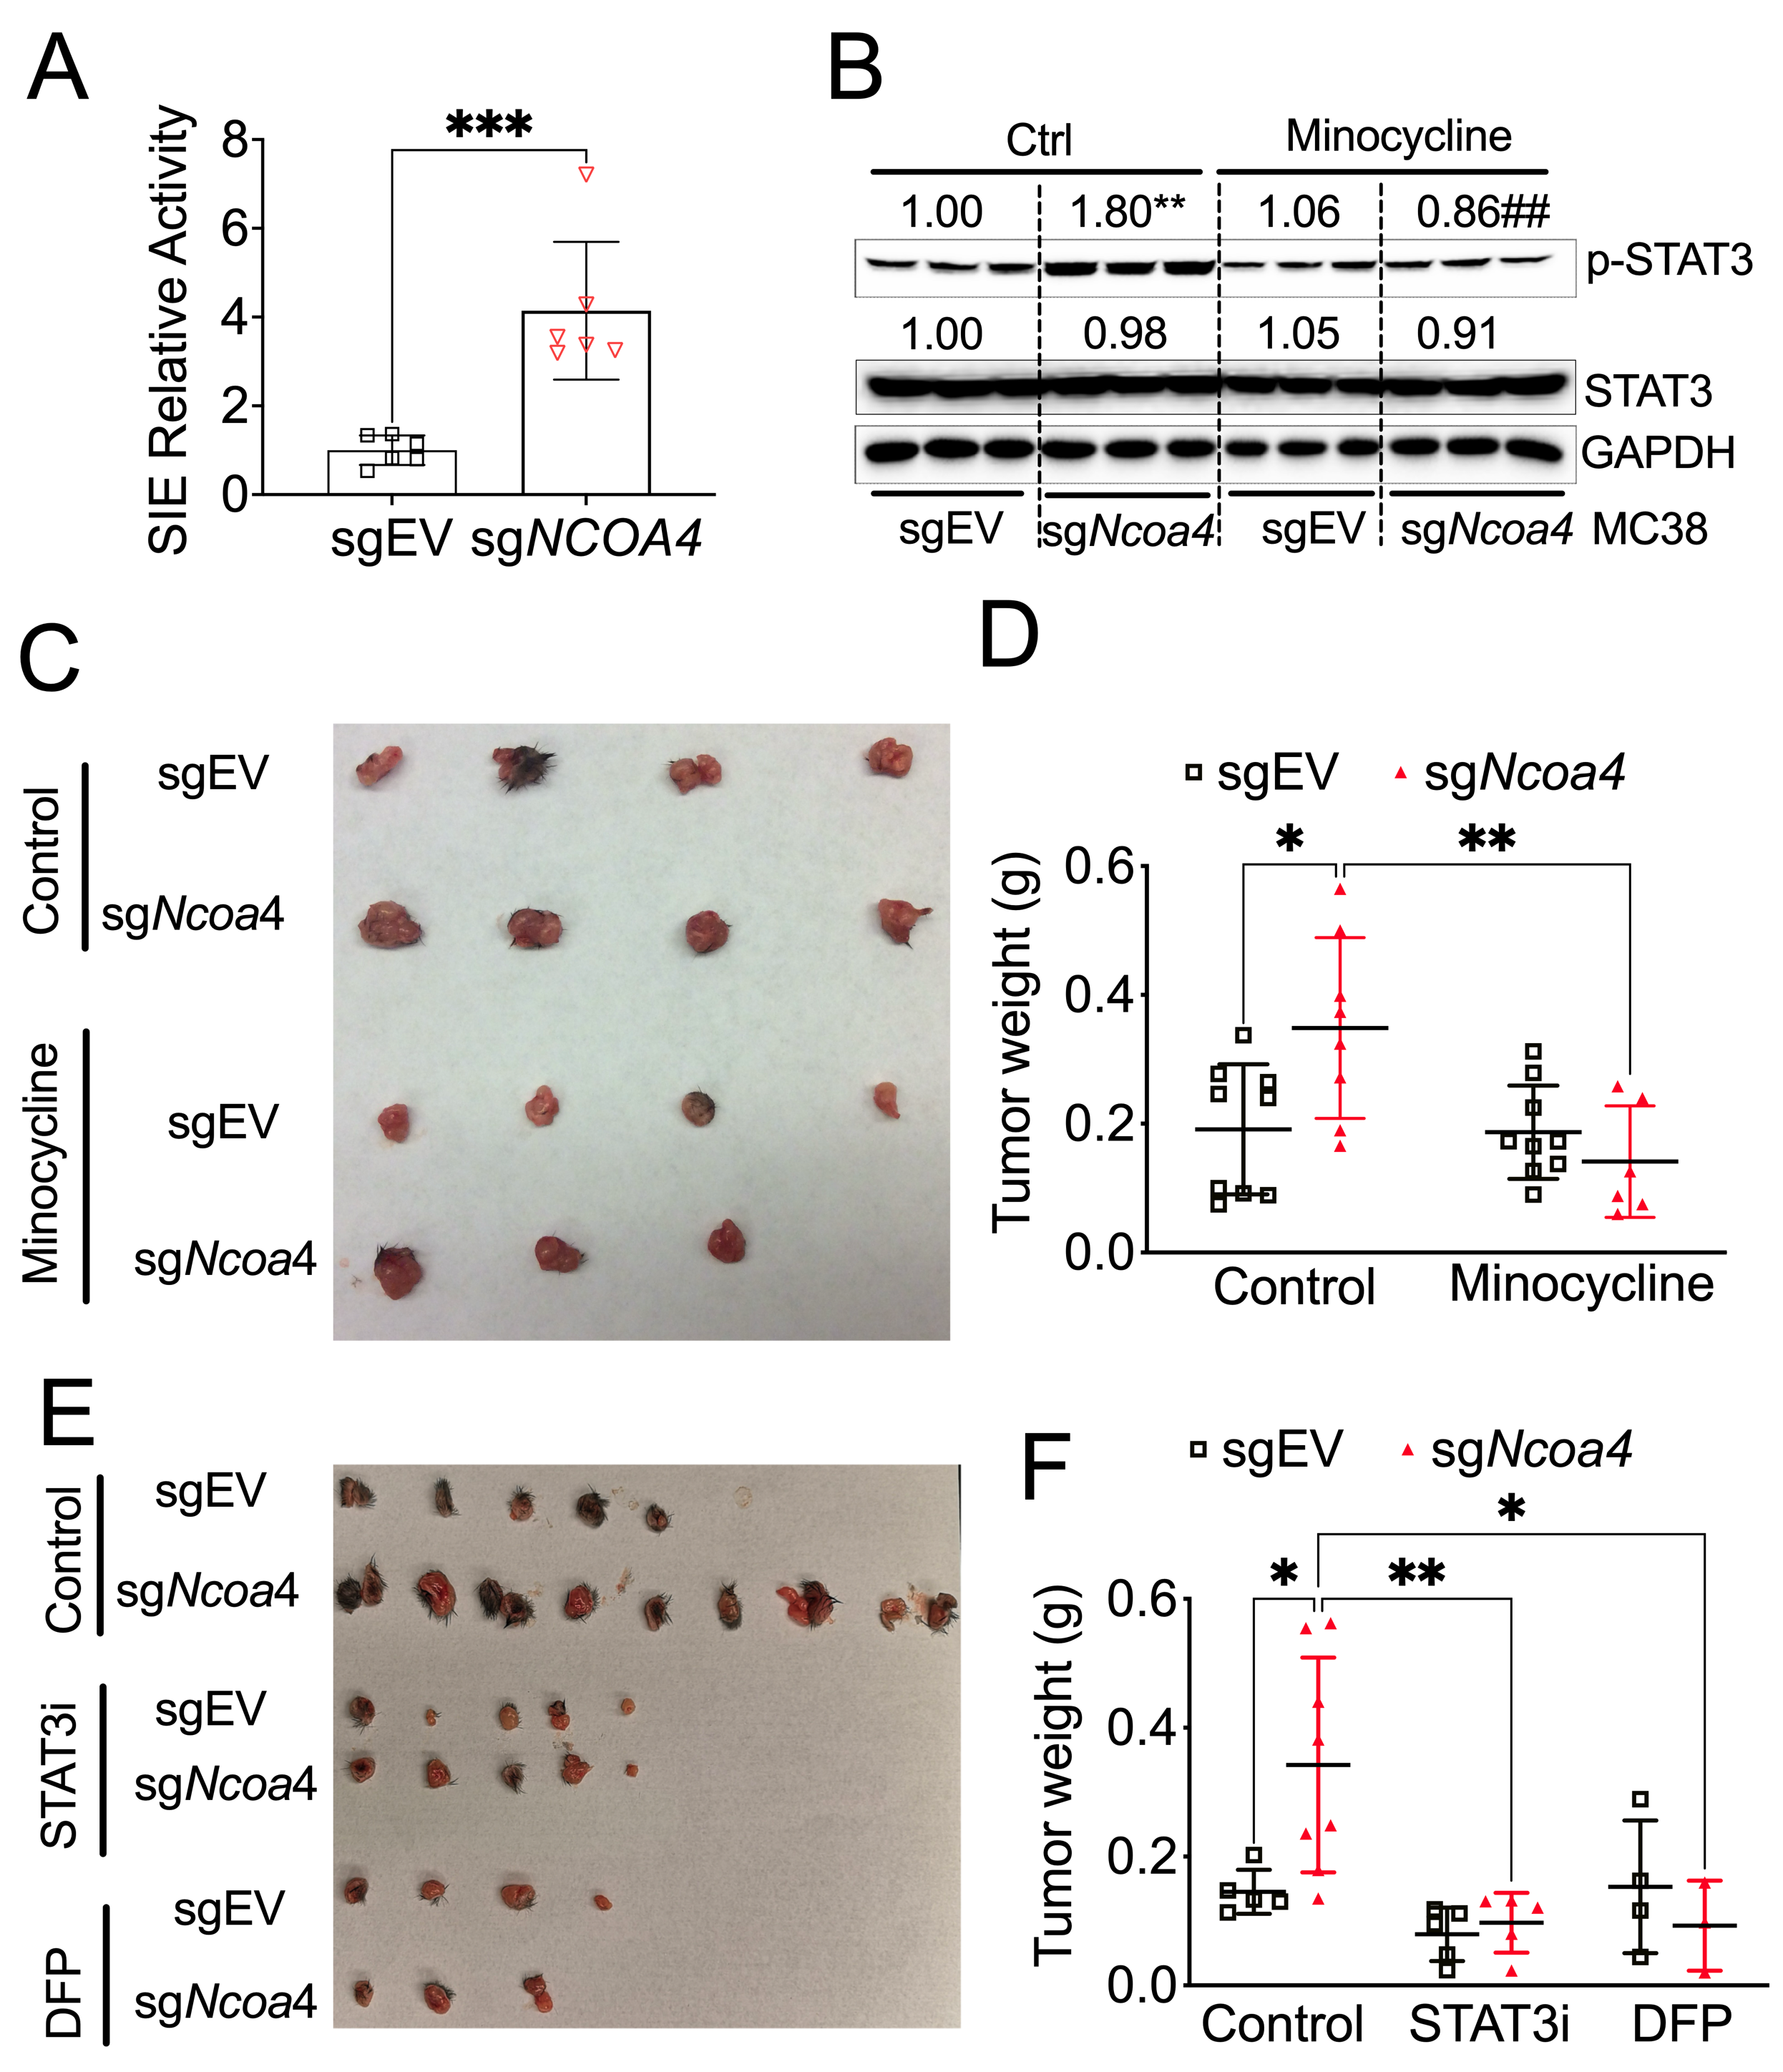


**Figure S7. STAT3 signaling activated via NCOA4 knockout is critical for colon tumor growth. (A)** SIE luciferase assay quantification with stable sgEV and sg*NCOA4* HCT116 cells. **(B)** Immunoblot assay in MC38 cells with stable sgEV and sg*Ncoa4* expression treated with MCU inhibitor minocycline (20mM). Values above blots are mean. **(C)** Representative images and (**D**) tumor weight (n = 6-9) for xenograft tumors derived from mouse MC38 sgEV and sg*Ncoa4* cells in C57BL/6 mice treated with vehicle control or 20 mg/kg minocycline daily for three weeks. (**E**) Representative images and (**F**) tumor weight (n = 5-8) for xenograft tumors derived from mouse MC38 sgEV and sg*Ncoa4* cells in C57BL/6 mice treated with vehicle control, 5 mg/kg STAT3 inhibitor (STAT3i) NSC 74859 every other day or 1 mg/mL mitochondrial iron inhibitor deferiprone (DFP) administered in drinking water for one week. *p<0.05, **p<0.01 and ***p<0.001 vs sgEV Ctrl. ##p<0.01 vs sg*Ncoa4* Ctrl. Unpaired Student t test for A and D. Two-way ANOVA followed with Sidak’s multiple comparisons test for B and F.
