# Supplementary material for: Ferritinophagy Loss Drives Mitochondrial Iron Import and Colorectal Tumorigenesis
Source: Research Square preprint supplement (doi:10.21203/rs.3.rs-7483419/v1), 2025-09-23
Supplement: Supplementary file 3 [file f23a0ecb2db7f4fe0bc1f2d3.xlsx]

## Sheet: protein_quant_23070
Protein Id	Gene Symbol	Description	Group ID	Number of peptides	Collapsed	Parsimony	2741	2742	2743	2744	2745	2785	2786	2787	2788	2789	2790
sp|Q14AX6|CDK12_MOUSE	Cdk12	Cyclin-dependent kinase 12 OS=Mus musculus OX=10090 GN=Cdk12 PE=1 SV=2	0	3	C	UR	292.553	211.083	86.9163	292.698	174.997	353.951	96.4841	268.514	343.749	279.579	224.943
sp|Q9QYL7|ABT1_MOUSE	Abt1	Activator of basal transcription 1 OS=Mus musculus OX=10090 GN=Abt1 PE=2 SV=1	1	2	C	UR	192.183	104.432	346.592	186.185	175.597	112.505	325.16	237.906	178.414	224.532	170.997
sp|Q99KD5|UN45A_MOUSE	Unc45a	Protein unc-45 homolog A OS=Mus musculus OX=10090 GN=Unc45a PE=1 SV=2	2	8	C	UR	908.645	586.451	598.959	883.331	638.981	1096.32	506.921	869.692	934.168	884.478	858.428
sp|Q80WW9|DDRGK_MOUSE	Ddrgk1	DDRGK domain-containing protein 1 OS=Mus musculus OX=10090 GN=Ddrgk1 PE=1 SV=2	3	1	C	UR	73.7137	53.7119	27.6408	176.923	70.1932	162.467	7.53158	137.767	322.957	228.68	149.352
sp|Q3TW96|UAP1L_MOUSE	Uap1l1	UDP-N-acetylhexosamine pyrophosphorylase-like protein 1 OS=Mus musculus OX=10090 GN=Uap1l1 PE=1 SV=1	4	6	C	UR	953.824	732.914	577.415	785.208	1241.03	1064.83	425.112	1319.29	1269.7	1371.55	1340.51
tr|Q3UHZ7|Q3UHZ7_MOUSE	Uap1	UDP-N-acetylhexosamine pyrophosphorylase OS=Mus musculus OX=10090 GN=Uap1 PE=1 SV=1	4	16	C	UR	3425.47	3691.6	984.078	2003.56	6117.87	3011.31	502.285	4765.11	3627.12	3783.73	4372.37
sp|Q8BHE5|BMP3_MOUSE	Bmp3	Bone morphogenetic protein 3 OS=Mus musculus OX=10090 GN=Bmp3 PE=1 SV=1	5	2	C	UR	165.136	178.882	246.368	136.316	150.788	191.508	227.182	142.719	159.597	178.22	190.347
sp|O35226|PSMD4_MOUSE	Psmd4	26S proteasome non-ATPase regulatory subunit 4 OS=Mus musculus OX=10090 GN=Psmd4 PE=1 SV=1	6	6	C	UR	848.76	537.558	598.678	638.248	1103.77	765.291	548.85	788.381	760.232	624.272	847.768
sp|Q7M758|NALDL_MOUSE	Naaladl1	Aminopeptidase NAALADL1 OS=Mus musculus OX=10090 GN=Naaladl1 PE=2 SV=1	7	4	C	UR	673.685	641.43	332.807	528.06	428.826	515.36	1079.93	453.174	501.503	330.182	563.091
sp|Q8VDP3|MICA1_MOUSE	Mical1	[F-actin]-monooxygenase MICAL1 OS=Mus musculus OX=10090 GN=Mical1 PE=1 SV=1	8	8	C	UR	796.454	1309.11	847.156	1032.22	1184.03	1167.16	627.875	1202.5	1557.23	1202.98	1407.51
tr|Q3UWL8|Q3UWL8_MOUSE	Pfdn4	Prefoldin subunit 4 OS=Mus musculus OX=10090 GN=Pfdn4 PE=1 SV=1	9	2	C	UR	209.453	233.721	60.7943	314.636	412.755	308.246	72.8359	495.061	297.895	400.541	311.162
sp|Q91YE6|IPO9_MOUSE	Ipo9	Importin-9 OS=Mus musculus OX=10090 GN=Ipo9 PE=1 SV=3	10	9	C	UR	1365.29	1638.04	1726.55	1708.46	1702.59	2013.96	1331.24	1915.35	2378.39	1839.02	1951.85
sp|Q9DCJ5|NDUA8_MOUSE	Ndufa8	NADH dehydrogenase [ubiquinone] 1 alpha subcomplex subunit 8 OS=Mus musculus OX=10090 GN=Ndufa8 PE=1 SV=3	11	3	C	UR	498.353	456.468	815.814	517.178	947.229	274.614	174.168	470.855	350.251	376.293	603.834
sp|Q62009|POSTN_MOUSE	Postn	Periostin OS=Mus musculus OX=10090 GN=Postn PE=1 SV=2	12	4	C	UR	99.0725	151.251	607.269	131.104	81.3288	468.629	834.416	127.624	297.405	315.008	66.0779
sp|Q60864|STIP1_MOUSE	Stip1	Stress-induced-phosphoprotein 1 OS=Mus musculus OX=10090 GN=Stip1 PE=1 SV=1	13	13	C	UR	1233.47	1341.64	810.932	1285.82	2132.56	1587	452.703	2831.01	2302.03	3224.51	2334.84
sp|Q921M4|GOGA2_MOUSE	Golga2	Golgin subfamily A member 2 OS=Mus musculus OX=10090 GN=Golga2 PE=1 SV=3	14	11	C	UR	589.649	326.447	179.127	539.143	615.839	694.493	122.792	917.578	681.595	882.07	667.102
sp|Q8C1B7|SEP11_MOUSE	Septin11	Septin-11 OS=Mus musculus OX=10090 GN=Septin11 PE=1 SV=4	15	6	C	UR	709.975	334.122	169.331	400.668	652.57	1099.88	155.305	1004.6	884.753	1367.55	788.389
sp|O55131|SEPT7_MOUSE	Septin7	Septin-7 OS=Mus musculus OX=10090 GN=Septin7 PE=1 SV=1	15	8	C	UR	1212.88	478.746	320.615	629.12	1256.5	1187.06	233.805	1119.44	1228.27	1175.86	1339.36
sp|Q9R1T4|SEPT6_MOUSE	Septin6	Septin-6 OS=Mus musculus OX=10090 GN=Septin6 PE=1 SV=4	15	5	C	UR	340.75	253.971	186.372	255.537	356.382	543.232	217.589	322.186	323.118	458.284	306.177
sp|Q8CHH9-2|SEPT8_MOUSE	Septin8	Isoform 2 of Septin-8 OS=Mus musculus OX=10090 GN=Septin8	15	2	C	UR	372.717	124.075	49.5076	197.068	536.102	562.423	42.0164	538.469	327.296	435.593	402.661
sp|Q8C650|SEP10_MOUSE	Septin10	Septin-10 OS=Mus musculus OX=10090 GN=Septin10 PE=1 SV=1	15	1	C	UR	246.772	216.718	48.9434	252.839	197.264	254.458	56.8272	227.295	258.873	258.189	211.013
sp|P35486|ODPA_MOUSE	Pdha1	Pyruvate dehydrogenase E1 component subunit alpha, somatic form, mitochondrial OS=Mus musculus OX=10090 GN=Pdha1 PE=1 SV=1	17	13	C	UR	955.381	1546.74	919.595	1145.07	1444.71	866.618	571.747	1430.04	1093.74	1044.03	1410.59
sp|Q62468|VILI_MOUSE	Vil1	Villin-1 OS=Mus musculus OX=10090 GN=Vil1 PE=1 SV=3	18	23	C	UR	6497.89	5556.6	1126.83	5395.4	6523.7	3695.97	994.094	5434.24	4094.81	4172.2	6762.94
sp|O88398|AVIL_MOUSE	Avil	Advillin OS=Mus musculus OX=10090 GN=Avil PE=1 SV=2	18	5	C	UR	506.236	497.496	312.473	558.283	697.421	685.794	220.356	508.844	341.671	372.156	588.627
tr|Q91VA7|Q91VA7_MOUSE	Idh3b	Isocitrate dehydrogenase [NAD] subunit, mitochondrial OS=Mus musculus OX=10090 GN=Idh3b PE=1 SV=1	19	11	C	UR	1530.14	1678.31	1440.88	1685.24	1079.94	1793.98	787.917	1350.4	1376.77	1401.03	1560.78
sp|Q6P4S8|INT1_MOUSE	Ints1	Integrator complex subunit 1 OS=Mus musculus OX=10090 GN=Ints1 PE=1 SV=2	20	8	C	UR	630.389	534.092	888.887	801.704	428.376	945.94	921.928	600.085	711.449	544.823	492.344
sp|Q91V98|CD248_MOUSE	Cd248	Endosialin OS=Mus musculus OX=10090 GN=Cd248 PE=1 SV=1	21	1	C	UR	59.7119	78.3005	83.3667	61.1269	64.7413	95.5534	72.7317	48.6995	88.9794	85.6768	43.5177
sp|Q9CPV4|GLOD4_MOUSE	Glod4	Glyoxalase domain-containing protein 4 OS=Mus musculus OX=10090 GN=Glod4 PE=1 SV=1	22	11	C	UR	2798.69	3155.82	1335.58	2373.08	3847.98	1896.7	2571.45	2676.14	2517.85	2490.21	3042.09
sp|Q9WUA3|PFKAP_MOUSE	Pfkp	ATP-dependent 6-phosphofructokinase, platelet type OS=Mus musculus OX=10090 GN=Pfkp PE=1 SV=1	23	10	C	UR	2168.03	1654.4	1088.87	1968.52	1130.27	1891.06	761.123	1437.57	1832.79	1580.38	1383.63
sp|P47857-3|PFKAM_MOUSE	Pfkm	Isoform 3 of ATP-dependent 6-phosphofructokinase, muscle type OS=Mus musculus OX=10090 GN=Pfkm	23	5	C	UR	371.409	548.761	247.428	468.074	354.097	690.817	188.837	395.271	525.836	545.889	288.049
sp|P12382|PFKAL_MOUSE	Pfkl	ATP-dependent 6-phosphofructokinase, liver type OS=Mus musculus OX=10090 GN=Pfkl PE=1 SV=4	23	4	C	UR	266.013	272.126	146.412	312.18	166.384	255.828	79.0424	210.746	223.14	206.375	156.205
sp|Q9ESW4|AGK_MOUSE	Agk	Acylglycerol kinase, mitochondrial OS=Mus musculus OX=10090 GN=Agk PE=1 SV=1	24	5	C	UR	158.427	171.492	334.422	157.026	68.8395	205.432	238.081	68.307	108.286	140.067	68.2676
sp|Q8VCX5-2|MICU1_MOUSE	Micu1	Isoform 2 of Calcium uptake protein 1, mitochondrial OS=Mus musculus OX=10090 GN=Micu1	25	5	C	UR	741.331	593.013	778.109	701.402	400.309	458.343	274.088	353.724	400.364	391.741	467.086
sp|P55264|ADK_MOUSE	Adk	Adenosine kinase OS=Mus musculus OX=10090 GN=Adk PE=1 SV=2	26	11	C	UR	1643.76	1646.7	1543.48	1079.22	1752.53	1316.71	3181.16	1250.1	864.65	964.2	1006.23
sp|P21107|TPM3_MOUSE	Tpm3	Tropomyosin alpha-3 chain OS=Mus musculus OX=10090 GN=Tpm3 PE=1 SV=3	27	11	C	UR	1957.63	1609.81	252.565	2610.78	2032.06	4238.84	211.308	2343.76	2217.76	4635.55	2152
sp|P58774|TPM2_MOUSE	Tpm2	Tropomyosin beta chain OS=Mus musculus OX=10090 GN=Tpm2 PE=1 SV=1	27	8	C	UR	299.418	357.73	172.89	1111.01	445.348	5450.55	169.846	759.233	841.063	5204.37	310.668
sp|P58774-2|TPM2_MOUSE	Tpm2	Isoform 2 of Tropomyosin beta chain OS=Mus musculus OX=10090 GN=Tpm2	27	1	C	UR	38.4093	34.4442	11.8858	113.847	38.319	135.637	13.3758	65.5615	57.9235	127.713	25.7297
sp|Q6IRU2|TPM4_MOUSE	Tpm4	Tropomyosin alpha-4 chain OS=Mus musculus OX=10090 GN=Tpm4 PE=1 SV=3	27	7	C	UR	1473.08	1350.82	198.4	2050.47	1571.25	2103.3	160.968	2508.31	2549.75	2422.61	1624.47
sp|P21107-2|TPM3_MOUSE	Tpm3	Isoform 2 of Tropomyosin alpha-3 chain OS=Mus musculus OX=10090 GN=Tpm3	27	9	C	UR	1073.32	562.563	112.306	1090.27	953.58	1156.09	84.4553	1248.63	1573.23	1572.13	1382.49
tr|B7ZNL3|B7ZNL3_MOUSE	Tpm1	Tpm1 protein OS=Mus musculus OX=10090 GN=Tpm1 PE=1 SV=1	27	4	C	UR	145.532	136.237	108.412	353.862	197.091	1288.78	59.6205	249.989	252.349	1231.95	165.029
tr|E9Q455|E9Q455_MOUSE	Tpm1	Tropomyosin alpha-1 chain OS=Mus musculus OX=10090 GN=Tpm1 PE=1 SV=1	27	3	C	UR	386.444	313.605	12.0246	343.446	554.115	283.266	42.9134	417.499	324.739	357.619	485.385
sp|P97807|FUMH_MOUSE	Fh	Fumarate hydratase, mitochondrial OS=Mus musculus OX=10090 GN=Fh PE=1 SV=3	28	19	C	UR	3445.09	4906.77	1286.73	3371.59	4480.72	2301.46	2360.02	2914.61	2171.57	2116.07	3036.36
sp|Q60931|VDAC3_MOUSE	Vdac3	Voltage-dependent anion-selective channel protein 3 OS=Mus musculus OX=10090 GN=Vdac3 PE=1 SV=1	29	13	C	UR	648.882	505.461	3447.17	539.225	100.764	514.38	5702.85	252.135	251.003	385.136	251.096
sp|Q60932|VDAC1_MOUSE	Vdac1	Voltage-dependent anion-selective channel protein 1 OS=Mus musculus OX=10090 GN=Vdac1 PE=1 SV=3	29	22	C	UR	1520.82	1935.97	8297.01	1364.31	878.565	1132.43	11155.3	870.705	748.693	983.56	1265.78
sp|Q8BH86|GLUCM_MOUSE	Dglucy	D-glutamate cyclase, mitochondrial OS=Mus musculus OX=10090 GN=Dglucy PE=1 SV=1	30	5	C	UR	506.985	722.835	349.118	527.973	659.394	611.661	165.181	838.04	715.695	752.88	782.003
sp|P07724|ALBU_MOUSE	Alb	Albumin OS=Mus musculus OX=10090 GN=Alb PE=1 SV=3	31	29	C	UR	5078.82	7838.73	7004.68	4368.26	5451.69	2578.83	12743.7	4401.88	4368.43	5178.3	5677.79
sp|P02769|ALBU_BOVIN_contaminant	ALB	Serum albumin OS=Bos taurus GN=ALB PE=1 SV=4	31	14	C	UR	1687.51	2800.44	3407.02	1298.03	1764.29	3735.38	4643.11	2294.97	568.005	573.806	8135
sp|P17426|AP2A1_MOUSE	Ap2a1	AP-2 complex subunit alpha-1 OS=Mus musculus OX=10090 GN=Ap2a1 PE=1 SV=1	32	22	C	UR	3545.51	3570.4	3286.38	3566.05	3333.43	3625.58	5218.41	2874.2	3190	2787.42	3229.59
sp|P17427|AP2A2_MOUSE	Ap2a2	AP-2 complex subunit alpha-2 OS=Mus musculus OX=10090 GN=Ap2a2 PE=1 SV=2	32	14	C	UR	1731.47	1915.15	499.998	1680.75	1656.83	1759.12	1144.16	1794.64	1850.74	1874.86	1776.86
sp|O35855|BCAT2_MOUSE	Bcat2	Branched-chain-amino-acid aminotransferase, mitochondrial OS=Mus musculus OX=10090 GN=Bcat2 PE=1 SV=2	33	10	C	UR	1618.16	1214.23	2142.71	1430.62	2228.27	1793.94	2405.85	1322.66	1014.48	1228.09	1195.54
sp|Q8CHT0|AL4A1_MOUSE	Aldh4a1	Delta-1-pyrroline-5-carboxylate dehydrogenase, mitochondrial OS=Mus musculus OX=10090 GN=Aldh4a1 PE=1 SV=3	34	13	C	UR	883.454	1129.38	2610.32	1038.47	1345.46	837.273	4285.22	877.527	776.422	871.29	1131.55
sp|P19096|FAS_MOUSE	Fasn	Fatty acid synthase OS=Mus musculus OX=10090 GN=Fasn PE=1 SV=2	35	28	C	UR	3855.08	3780.37	1652.3	4214.63	4681.47	4922.23	1951.62	5408.74	4421.46	4777.72	4045.77
sp|Q99M04|LIAS_MOUSE	Lias	Lipoyl synthase, mitochondrial OS=Mus musculus OX=10090 GN=Lias PE=1 SV=1	36	2	C	UR	227.193	354.38	354.343	254.504	282.149	157.713	272.967	202.757	193.629	190.215	187.137
sp|P52480|KPYM_MOUSE	Pkm	Pyruvate kinase PKM OS=Mus musculus OX=10090 GN=Pkm PE=1 SV=4	37	19	C	UR	1208.55	2617.94	1563.76	1587.93	1458.46	847.689	2431.26	1250.95	1210.73	905.433	1072.23
sp|P52480-2|KPYM_MOUSE	Pkm	Isoform M1 of Pyruvate kinase PKM OS=Mus musculus OX=10090 GN=Pkm	37	2	C	UR	406.995	543.458	195.407	390.686	457.116	631.115	454.352	321.165	347.005	458.431	343.489
sp|P53657|KPYR_MOUSE	Pklr	Pyruvate kinase PKLR OS=Mus musculus OX=10090 GN=Pklr PE=1 SV=1	37	9	C	UR	971.082	1516.74	824.771	933.374	1415.28	750.614	1914.31	1128.66	908.139	758.088	1078.16
sp|Q9WTX2|PRKRA_MOUSE	Prkra	Interferon-inducible double-stranded RNA-dependent protein kinase activator A OS=Mus musculus OX=10090 GN=Prkra PE=1 SV=1	38	3	C	UR	720.594	316.75	101.892	545.366	430.148	758.098	182.59	698.625	551.688	628.496	619.982
sp|Q08509|EPS8_MOUSE	Eps8	Epidermal growth factor receptor kinase substrate 8 OS=Mus musculus OX=10090 GN=Eps8 PE=1 SV=2	40	12	C	UR	929.572	1468.13	2007.19	1682.17	2187.45	680.271	1028.94	1542.76	1569.1	1451.68	3454.97
tr|G3X972|G3X972_MOUSE	Sec24c	Sec24-related gene family, member C (S. cerevisiae) OS=Mus musculus OX=10090 GN=Sec24c PE=1 SV=1	41	18	C	UR	2525.54	2528.3	573.971	2525.1	2325.21	2244.7	854.925	2082.36	2198.75	1753.21	2292.71
sp|P28660|NCKP1_MOUSE	Nckap1	Nck-associated protein 1 OS=Mus musculus OX=10090 GN=Nckap1 PE=1 SV=2	42	14	C	UR	3368.17	3090.07	4798.01	3521.24	2233.36	3575.83	4132.24	2554.98	2849.28	2352.96	3006.02
sp|Q8K1X4|NCKPL_MOUSE	Nckap1l	Nck-associated protein 1-like OS=Mus musculus OX=10090 GN=Nckap1l PE=1 SV=1	42	2	C	UR	152.44	181.999	148.286	254.827	142.096	227.373	170.185	152.366	227.174	171.836	153.716
sp|P37804|TAGL_MOUSE	Tagln	Transgelin OS=Mus musculus OX=10090 GN=Tagln PE=1 SV=3	43	9	C	UR	738.21	835.515	157.22	1476.75	542.964	7186.22	518.325	1412.84	781.264	3806	534.489
tr|Q6PFA2|Q6PFA2_MOUSE	Clta	Clathrin light chain OS=Mus musculus OX=10090 GN=Clta PE=1 SV=1	44	2	C	UR	312.573	106.986	47.997	224.85	376.105	269.793	30.7281	422.786	265.772	369.898	382.445
sp|A3KGB4|TBC8B_MOUSE	Tbc1d8b	TBC1 domain family member 8B OS=Mus musculus OX=10090 GN=Tbc1d8b PE=1 SV=1	44	6	C	UR	1215.01	649.288	521.462	1064.36	1237.31	1337.23	389.611	1289.16	1149.47	1224.72	1221.47
sp|Q9ERG0|LIMA1_MOUSE	Lima1	LIM domain and actin-binding protein 1 OS=Mus musculus OX=10090 GN=Lima1 PE=1 SV=3	45	11	C	UR	724.81	673.168	782.382	850.511	738.984	559.352	449.787	996.587	835.666	912.266	1257.71
sp|Q9CRB9|MIC19_MOUSE	Chchd3	MICOS complex subunit Mic19 OS=Mus musculus OX=10090 GN=Chchd3 PE=1 SV=1	46	8	C	UR	1983.58	1849.77	868.865	1664.92	2026.35	1102.85	313.385	1751.37	1170.33	1653.83	2005.82
sp|Q5SWU9-2|ACACA_MOUSE	Acaca	Isoform 2 of Acetyl-CoA carboxylase 1 OS=Mus musculus OX=10090 GN=Acaca	47	15	C	UR	1109.62	989.218	561.562	1467.36	1300.93	1264.69	378.952	1203.93	1446.17	1399.77	1108.02
sp|E9Q4Z2|ACACB_MOUSE	Acacb	Acetyl-CoA carboxylase 2 OS=Mus musculus OX=10090 GN=Acacb PE=1 SV=1	47	9	C	UR	505.244	319.556	168.656	535.025	489.353	501.536	158.793	375.312	378.926	355.856	335.744
sp|P09103|PDIA1_MOUSE	P4hb	Protein disulfide-isomerase OS=Mus musculus OX=10090 GN=P4hb PE=1 SV=2	48	27	C	UR	5018.51	7780.68	3874.07	5640.02	6071.29	3441.96	5119.01	4516.93	4327.77	4139.5	4631.59
sp|Q9WU79|PROD_MOUSE	Prodh	Proline dehydrogenase 1, mitochondrial OS=Mus musculus OX=10090 GN=Prodh PE=1 SV=2	49	6	C	UR	495.07	383.419	900.926	489.244	209.887	542.039	381.891	285.353	335.881	439.096	269.76
sp|Q9JMH9-6|MY18A_MOUSE	Myo18a	Isoform 6 of Unconventional myosin-XVIIIa OS=Mus musculus OX=10090 GN=Myo18a	50	16	C	UR	1770.65	1676.13	520.628	1793.23	2149.99	1382.25	297.107	2592.06	1554.1	1821.18	2575.74
sp|Q9Z1W8|AT12A_MOUSE	Atp12a	Potassium-transporting ATPase alpha chain 2 OS=Mus musculus OX=10090 GN=Atp12a PE=1 SV=3	51	20	C	UR	3470.34	8018.76	7215.23	5006.19	3794.01	2695.65	2627.7	2298.37	2525.89	2027.12	4199.68
sp|Q8VDN2|AT1A1_MOUSE	Atp1a1	Sodium/potassium-transporting ATPase subunit alpha-1 OS=Mus musculus OX=10090 GN=Atp1a1 PE=1 SV=1	51	30	C	UR	6551.62	7721.41	6362.09	7394.14	5127	4843.49	4010.98	4990.83	4791.98	4465.81	5371.64
sp|Q9WV27|AT1A4_MOUSE	Atp1a4	Sodium/potassium-transporting ATPase subunit alpha-4 OS=Mus musculus OX=10090 GN=Atp1a4 PE=1 SV=3	51	6	C	UR	908.641	1115.82	568.579	970.638	701.867	655.744	521.142	561.031	614.244	553.692	661.618
tr|G3X8U3|G3X8U3_MOUSE	2210016F16Rik	Queuosine salvage protein OS=Mus musculus OX=10090 GN=2210016F16Rik PE=1 SV=1	52	7	C	UR	431.253	586.29	150.75	394.278	556.629	461.617	566.91	608.351	414.821	432.393	566.68
sp|Q8BFV2|PCID2_MOUSE	Pcid2	PCI domain-containing protein 2 OS=Mus musculus OX=10090 GN=Pcid2 PE=1 SV=1	53	1	C	UR	52.401	43.6826	38.3502	49.817	25.5189	60.2044	29.1368	46.8577	42.7351	26.1513	33.6768
sp|Q9QZQ1|AFAD_MOUSE	Afdn	Afadin OS=Mus musculus OX=10090 GN=Afdn PE=1 SV=3	54	7	C	UR	644.463	483.992	304.622	527.115	643.344	599.844	229.099	959.291	901.098	881.835	1061.62
sp|Q8BM96|AGRG7_MOUSE	Adgrg7	Adhesion G-protein coupled receptor G7 OS=Mus musculus OX=10090 GN=Adgrg7 PE=1 SV=2	55	9	C	UR	859.099	774.526	1621.8	682.052	633.243	485.009	1905.48	517.491	570.699	433.978	714.898
sp|Q7TQ65|TMC4_MOUSE	Tmc4	Transmembrane channel-like protein 4 OS=Mus musculus OX=10090 GN=Tmc4 PE=2 SV=2	56	4	C	UR	656.315	435.728	579.078	637.351	405.775	517.679	454.531	475.51	554.834	441.085	513.499
sp|Q8BJZ4|RT35_MOUSE	Mrps35	28S ribosomal protein S35, mitochondrial OS=Mus musculus OX=10090 GN=Mrps35 PE=1 SV=2	57	6	C	UR	988.447	1236.96	600.103	1345.93	1389.96	728.804	341.887	1151.8	866.507	832.988	1293.06
tr|Q3TMP1|Q3TMP1_MOUSE	Gtf3c3	General transcription factor IIIC, polypeptide 3 OS=Mus musculus OX=10090 GN=Gtf3c3 PE=1 SV=1	58	6	C	UR	677.754	435.432	273.174	777.922	516.832	1105.21	260.772	713.941	794.378	663.596	527.161
sp|Q9CXI0|COQ5_MOUSE	Coq5	2-methoxy-6-polyprenyl-1,4-benzoquinol methylase, mitochondrial OS=Mus musculus OX=10090 GN=Coq5 PE=1 SV=2	59	9	C	UR	1478.49	1312.87	756.617	1438.66	1257.06	1205.8	380.572	981.086	874.532	1015.93	1177.54
sp|O08832|GALT4_MOUSE	Galnt4	Polypeptide N-acetylgalactosaminyltransferase 4 OS=Mus musculus OX=10090 GN=Galnt4 PE=1 SV=1	60	10	C	UR	1639.83	1140.45	1228.69	1439	1260.7	1230	1494.35	700.898	711.457	666.018	1075.41
sp|Q6PB93|GALT2_MOUSE	Galnt2	Polypeptide N-acetylgalactosaminyltransferase 2 OS=Mus musculus OX=10090 GN=Galnt2 PE=1 SV=1	60	5	C	UR	247.337	174.636	523.435	209.494	154.299	257.098	419.415	154.282	227.926	226.301	134.183
sp|Q8BGT9|GLT12_MOUSE	Galnt12	Polypeptide N-acetylgalactosaminyltransferase 12 OS=Mus musculus OX=10090 GN=Galnt12 PE=2 SV=1	60	8	C	UR	1323.99	766.99	2708.03	1331.52	576.873	1158.04	2080.72	515.478	553.414	564.938	496.865
sp|Q8CBQ5|P4K2B_MOUSE	Pi4k2b	Phosphatidylinositol 4-kinase type 2-beta OS=Mus musculus OX=10090 GN=Pi4k2b PE=1 SV=1	61	6	C	UR	427.193	310.14	273.887	411.515	224.554	329.559	255.075	226.427	327.172	241.434	296.749
sp|P97742|CPT1A_MOUSE	Cpt1a	Carnitine O-palmitoyltransferase 1, liver isoform OS=Mus musculus OX=10090 GN=Cpt1a PE=1 SV=4	62	8	C	UR	1336.84	1005.31	1654.81	1063.76	302.223	987.958	797.695	428.3	649.771	643.016	551.769
sp|P35908|K22E_HUMAN_contaminant	KRT2	Keratin, type II cytoskeletal 2 epidermal OS=Homo sapiens GN=KRT2 PE=1 SV=2	63	17	C	UR	1572.58	3746.84	1111.36	1426.43	730.469	507.439	2500.14	2884.37	5395.01	1025.53	414.613
sp|P15331-2|PERI_MOUSE	Prph	Isoform 3u of Peripherin OS=Mus musculus OX=10090 GN=Prph	63	3	C	UR	62.9016	75.4454	112.847	87.6797	48.1757	880.982	92.3061	80.4699	228.579	928.743	57.7715
sp|Q9DCV7|K2C7_MOUSE	Krt7	Keratin, type II cytoskeletal 7 OS=Mus musculus OX=10090 GN=Krt7 PE=1 SV=1	63	16	C	UR	1878.11	957.329	467.476	2024.24	1714.52	1810.75	352.506	2500.87	2870.64	3004.99	3785.24
sp|P50446|K2C6A_MOUSE	Krt6a	Keratin, type II cytoskeletal 6A OS=Mus musculus OX=10090 GN=Krt6a PE=1 SV=3	63	2	C	UR	66.0226	96.1715	369.26	170.226	24.968	6.77328	227.454	143.312	119.79	50.0575	93.0808
sp|P48668|K2C6C_HUMAN_contaminant	KRT6C	Keratin, type II cytoskeletal 6C OS=Homo sapiens GN=KRT6C PE=1 SV=3	63	5	C	UR	342.063	276.805	229.491	228.837	124.516	91.2659	384.49	232.208	183.698	154.871	189.941
sp|Q99M73|KRT84_MOUSE	Krt84	Keratin, type II cuticular Hb4 OS=Mus musculus OX=10090 GN=Krt84 PE=2 SV=2	63	5	C	UR	670.793	475.512	189.417	670.611	342.365	339.414	228.943	412.718	898.181	455.834	839.607
sp|Q6IMF0|KRT87_MOUSE	Krt87	Keratin, type II cuticular 87 OS=Mus musculus OX=10090 GN=Krt87 PE=2 SV=2	63	3	C	UR	66.6833	24.8031	20.1982	91.2489	100.363	81.4543	17.7283	74.4131	190.847	50.5934	91.7926
sp|P04104|K2C1_MOUSE	Krt1	Keratin, type II cytoskeletal 1 OS=Mus musculus OX=10090 GN=Krt1 PE=1 SV=4	63	1	C	UR	19.921	6.0003	70.6012	45.0528	0	0	10.8944	2.73225	6.13658	2.53525	0
sp|P11679|K2C8_MOUSE	Krt8	Keratin, type II cytoskeletal 8 OS=Mus musculus OX=10090 GN=Krt8 PE=1 SV=4	63	19	C	UR	2989.49	1308.09	606.517	2618.33	2039.28	1991.95	646.389	3401.57	3685.27	4030.65	5829.06
sp|P05787|K2C8_HUMAN_contaminant	KRT8	Keratin, type II cytoskeletal 8 OS=Homo sapiens GN=KRT8 PE=1 SV=7	63	28	C	UR	2792.34	2185.39	1773.83	3159.95	2056.65	1903.97	1230.74	2575.22	3271.23	3642.67	4572.98
tr|E9Q1Z0|E9Q1Z0_MOUSE	Krt90	Keratin 90 OS=Mus musculus OX=10090 GN=Krt90 PE=1 SV=1	63	5	C	UR	186.487	198.722	1557.87	718.512	56.0791	272.029	2528.81	350.967	1310.26	485.368	814.025
sp|P31001|DESM_MOUSE	Des	Desmin OS=Mus musculus OX=10090 GN=Des PE=1 SV=3	63	22	C	UR	529.331	538.296	283.6	1564.31	457.496	9339.48	411.389	1062.38	1508.25	9113.94	365.66
sp|P20152|VIME_MOUSE	Vim	Vimentin OS=Mus musculus OX=10090 GN=Vim PE=1 SV=3	63	15	C	UR	804.061	898.842	351.989	790.677	1083.08	2243.31	320.89	2037.29	3837.13	5514.04	1408.72
sp|P13647|K2C5_HUMAN_contaminant	KRT5	Keratin, type II cytoskeletal 5 OS=Homo sapiens GN=KRT5 PE=1 SV=3	63	12	C	UR	1566.93	2841.61	864.986	757.738	483.326	351.102	1886.59	2080.86	1513.29	630.562	415.628
sp|P04264|K2C1_HUMAN_contaminant	KRT1	Keratin, type II cytoskeletal 1 OS=Homo sapiens GN=KRT1 PE=1 SV=6	63	16	C	UR	2598.72	3850.19	1512.43	1178.81	994.711	762.753	2273.79	2496.42	1875.3	656.794	778.464
sp|P03995|GFAP_MOUSE	Gfap	Glial fibrillary acidic protein OS=Mus musculus OX=10090 GN=Gfap PE=1 SV=4	63	2	C	UR	36.3347	42.0607	59.8315	66.9558	72.9966	399.522	47.6465	85.4853	95.2533	349.973	44.2112
sp|Q8N1N4|K2C78_HUMAN_contaminant	KRT78	Keratin, type II cytoskeletal 78 OS=Homo sapiens GN=KRT78 PE=2 SV=2	63	2	C	UR	81.8292	139.755	92.2593	51.1648	50.7865	42.1264	96.2077	81.1069	98.2672	44.9157	40.1406
tr|E9QKE4|E9QKE4_MOUSE	Rab3gap2	Rab3 GTPase-activating protein non-catalytic subunit OS=Mus musculus OX=10090 GN=Rab3gap2 PE=1 SV=1	64	9	C	UR	933.882	688.916	284.596	877.403	592.732	787.61	265.669	822.126	979.255	1003.57	870.544
sp|Q6ZQA6|IGSF3_MOUSE	Igsf3	Immunoglobulin superfamily member 3 OS=Mus musculus OX=10090 GN=Igsf3 PE=1 SV=2	65	3	C	UR	91.8783	108.34	274.293	111.502	68.8465	95.0155	398.28	82.0126	81.1026	83.9215	102.26
sp|P47738|ALDH2_MOUSE	Aldh2	Aldehyde dehydrogenase, mitochondrial OS=Mus musculus OX=10090 GN=Aldh2 PE=1 SV=1	66	21	C	UR	2968.89	5270.63	867.062	4158.16	3982.77	2405.06	1627.46	2944.53	2787.41	2556.08	3530.47
sp|Q9CZS1|AL1B1_MOUSE	Aldh1b1	Aldehyde dehydrogenase X, mitochondrial OS=Mus musculus OX=10090 GN=Aldh1b1 PE=1 SV=1	66	16	C	UR	2054.32	2545.65	1013.1	2249.73	2192.62	1878.9	390.333	1713.15	1454.96	1759.3	1744.82
sp|Q9JHW9|AL1A3_MOUSE	Aldh1a3	Aldehyde dehydrogenase family 1 member A3 OS=Mus musculus OX=10090 GN=Aldh1a3 PE=1 SV=1	66	6	C	UR	347.392	692.107	226.257	649.097	370.458	316.926	526.937	801.143	934.899	624.044	2084.9
sp|O35945|AL1A7_MOUSE	Aldh1a7	Aldehyde dehydrogenase, cytosolic 1 OS=Mus musculus OX=10090 GN=Aldh1a7 PE=1 SV=1	66	12	C	UR	3092.72	3046.03	428.407	2219.6	3072.27	2050.78	377.634	2140.46	1488.52	2234.24	1874.1
sp|P24549|AL1A1_MOUSE	Aldh1a1	Retinal dehydrogenase 1 OS=Mus musculus OX=10090 GN=Aldh1a1 PE=1 SV=5	66	11	C	UR	2533.94	2807.64	363.571	1600.43	1805.68	1441.76	375.425	1583.98	1227.5	1739.48	1484.88
sp|Q62148|AL1A2_MOUSE	Aldh1a2	Retinal dehydrogenase 2 OS=Mus musculus OX=10090 GN=Aldh1a2 PE=1 SV=2	66	4	C	UR	129.593	278.605	182.071	152.921	174.368	145.999	170.61	167.995	116.606	233.535	131.351
sp|Q8BGB7|ENOPH_MOUSE	Enoph1	Enolase-phosphatase E1 OS=Mus musculus OX=10090 GN=Enoph1 PE=1 SV=1	67	6	C	UR	808.22	1182.13	1046.69	742.391	1288.95	508.856	1696.23	775.276	602.627	533.696	678.127
sp|Q64674|SPEE_MOUSE	Srm	Spermidine synthase OS=Mus musculus OX=10090 GN=Srm PE=1 SV=1	68	6	C	UR	222.22	570.349	135.914	294.443	420.506	224.701	140.776	421.043	462.585	343.643	378.096
sp|Q3UQ44|IQGA2_MOUSE	Iqgap2	Ras GTPase-activating-like protein IQGAP2 OS=Mus musculus OX=10090 GN=Iqgap2 PE=1 SV=2	69	20	C	UR	2915	1786.65	1762.98	2215.08	1994.49	2594.79	1321.87	2764.79	2753	2885.89	3112.08
sp|Q9JKF1|IQGA1_MOUSE	Iqgap1	Ras GTPase-activating-like protein IQGAP1 OS=Mus musculus OX=10090 GN=Iqgap1 PE=1 SV=2	69	25	C	UR	5380.41	3950.81	4055.35	4743.86	6110.25	4555	3647.95	6603.73	5230.29	5702.97	6822.61
sp|Q8BK67|RCC2_MOUSE	Rcc2	Protein RCC2 OS=Mus musculus OX=10090 GN=Rcc2 PE=1 SV=1	70	12	C	UR	2271.92	2663.82	548.768	2322.49	3293.74	1960.47	583.534	3134.63	2929.22	2397.26	2793.26
sp|P16330|CN37_MOUSE	Cnp	2',3'-cyclic-nucleotide 3'-phosphodiesterase OS=Mus musculus OX=10090 GN=Cnp PE=1 SV=3	71	3	C	UR	338.336	352.796	618.489	464.207	258.76	467.262	564.236	360.387	382.46	353.903	344.204
tr|A2AJW4|A2AJW4_MOUSE	Ppp1r3d	Protein phosphatase 1, regulatory subunit 3D OS=Mus musculus OX=10090 GN=Ppp1r3d PE=1 SV=1	72	1	C	UR	9.90907	2.5221	3.50034	7.84507	13.1371	18.3837	0	18.3131	30.9226	38.798	20.4492
sp|Q8K2C7|OS9_MOUSE	Os9	Protein OS-9 OS=Mus musculus OX=10090 GN=Os9 PE=1 SV=2	73	5	C	UR	252.009	478.341	413.446	495.606	518.619	141.313	139.592	402.741	441.021	567.662	596.623
sp|Q91X52|DCXR_MOUSE	Dcxr	L-xylulose reductase OS=Mus musculus OX=10090 GN=Dcxr PE=1 SV=2	74	7	C	UR	2842.48	2613.18	886.272	2184.28	3419.48	1526.67	705.367	1777.14	1524.46	1670.53	1999.74
sp|P52760|RIDA_MOUSE	Rida	2-iminobutanoate/2-iminopropanoate deaminase OS=Mus musculus OX=10090 GN=Rida PE=1 SV=3	75	3	C	UR	312.216	421.218	662.611	277.725	486.618	211.795	416.886	291.972	205.066	252.291	235.081
sp|Q91YP3|DEOC_MOUSE	Dera	Deoxyribose-phosphate aldolase OS=Mus musculus OX=10090 GN=Dera PE=1 SV=1	76	12	C	UR	2691.46	1470.39	628.281	2240.71	3000.78	2394.6	729.501	2085.1	1450.49	1344.62	1698.34
sp|P97351|RS3A_MOUSE	Rps3a	40S ribosomal protein S3a OS=Mus musculus OX=10090 GN=Rps3a PE=1 SV=3	77	15	C	UR	2469.06	3871.31	981.835	3572.01	3258.39	2654.61	749.338	4211.05	4672.1	3413.7	4548.67
sp|Q3U319|BRE1B_MOUSE	Rnf40	E3 ubiquitin-protein ligase BRE1B OS=Mus musculus OX=10090 GN=Rnf40 PE=1 SV=2	78	4	C	UR	401.426	400.992	134.51	379.152	649.651	356.397	133.608	980.126	902.557	963.393	765.979
sp|P57746|VATD_MOUSE	Atp6v1d	V-type proton ATPase subunit D OS=Mus musculus OX=10090 GN=Atp6v1d PE=1 SV=1	79	4	C	UR	290.348	209.291	121.298	285.19	391.222	397.734	118.601	375.476	258.876	295.548	397.081
sp|Q64737|PUR2_MOUSE	Gart	Trifunctional purine biosynthetic protein adenosine-3 OS=Mus musculus OX=10090 GN=Gart PE=1 SV=3	80	17	C	UR	2664.97	2482.05	490.956	2535.77	3804.86	2798.27	650.237	3831.28	3580.22	2992.59	2674.57
sp|Q6PGC1|DHX29_MOUSE	Dhx29	ATP-dependent RNA helicase DHX29 OS=Mus musculus OX=10090 GN=Dhx29 PE=1 SV=1	81	4	C	UR	246.44	223.501	78.9417	292.8	189.633	270.229	72.2688	268.532	383.833	274.145	232.356
sp|Q9CRA5|GOLP3_MOUSE	Golph3	Golgi phosphoprotein 3 OS=Mus musculus OX=10090 GN=Golph3 PE=1 SV=1	82	3	C	UR	68.2104	41.84	50.5704	73.2269	59.5147	103.188	26.5097	96.872	71.6347	75.4416	59.0753
sp|Q99PL5|RRBP1_MOUSE	Rrbp1	Ribosome-binding protein 1 OS=Mus musculus OX=10090 GN=Rrbp1 PE=1 SV=2	83	23	C	UR	3336.79	2459.95	466.09	2269.62	3729.06	2753.58	332.862	5426.48	5390.84	7143.6	5110.59
sp|P58281-2|OPA1_MOUSE	Opa1	Isoform 2 of Dynamin-like 120 kDa protein, mitochondrial OS=Mus musculus OX=10090 GN=Opa1	84	13	C	UR	1239.83	1359.9	1197.14	1376.33	1003.25	1175.43	650.277	1062.7	1338.42	1425.64	1122.99
sp|Q80X90|FLNB_MOUSE	Flnb	Filamin-B OS=Mus musculus OX=10090 GN=Flnb PE=1 SV=3	85	23	C	UR	3531.46	3785.19	7545.27	3608.26	3649.84	2247.26	9319.39	3678.76	2453.1	2501.47	3991.16
sp|Q8VHX6|FLNC_MOUSE	Flnc	Filamin-C OS=Mus musculus OX=10090 GN=Flnc PE=1 SV=3	85	21	C	UR	1072.59	1177.28	6991.72	1604.63	727.221	7762.16	5836.2	1043.33	2019.55	4390.56	737.359
sp|Q8BTM8|FLNA_MOUSE	Flna	Filamin-A OS=Mus musculus OX=10090 GN=Flna PE=1 SV=5	85	31	C	UR	1842.46	2093.43	4553.55	2864.18	2021	15225.3	8035.28	3142.8	4974.79	9422.19	2022.52
sp|P27546|MAP4_MOUSE	Map4	Microtubule-associated protein 4 OS=Mus musculus OX=10090 GN=Map4 PE=1 SV=3	86	1	C	UR	97.8005	70.4663	40.0734	102.267	70.2461	211.267	45.2634	72.914	103.575	145.923	138.551
sp|Q9QXY1|ZO3_MOUSE	Tjp3	Tight junction protein ZO-3 OS=Mus musculus OX=10090 GN=Tjp3 PE=1 SV=1	87	4	C	UR	245.088	195.712	185.672	254.965	424.88	202.558	68.1949	529.644	385.917	439.235	537.401
sp|Q8BWR8|RHPN2_MOUSE	Rhpn2	Rhophilin-2 OS=Mus musculus OX=10090 GN=Rhpn2 PE=1 SV=2	88	8	C	UR	725.672	766.204	654.526	711.794	573.852	589.284	465.438	966.848	796.158	740.589	854.174
tr|E9PZ16|E9PZ16_MOUSE	Hspg2	Basement membrane-specific heparan sulfate proteoglycan core protein OS=Mus musculus OX=10090 GN=Hspg2 PE=1 SV=1	89	34	C	UR	2288.46	3217.18	6341.3	2019.5	2649.2	4726.34	7026.19	1411.14	2582.51	2640.53	1409.92
sp|P47955|RLA1_MOUSE	Rplp1	60S acidic ribosomal protein P1 OS=Mus musculus OX=10090 GN=Rplp1 PE=1 SV=1	90	1	C	UR	279.028	284.27	19.3517	252.949	377.692	256.374	130.775	375.506	266.449	209.441	279.059
sp|Q9WTM5|RUVB2_MOUSE	Ruvbl2	RuvB-like 2 OS=Mus musculus OX=10090 GN=Ruvbl2 PE=1 SV=3	91	10	C	UR	1318.27	1324.09	244.641	1287.96	1918.86	1097.1	199.324	1957.12	1506.01	1749.94	1765.22
tr|Q8VCG1|Q8VCG1_MOUSE	Dut	Deoxyuridine 5'-triphosphate nucleotidohydrolase OS=Mus musculus OX=10090 GN=Dut PE=1 SV=1	92	5	C	UR	426.374	470.831	726.426	441.857	577.226	250.08	881.774	452.914	379.052	382.407	456.778
tr|E9PVY8|E9PVY8_MOUSE	Macf1	Microtubule-actin cross-linking factor 1 OS=Mus musculus OX=10090 GN=Macf1 PE=1 SV=2	93	18	C	UR	1623.05	1575.79	740.51	1718.4	1537.52	1794.65	628.121	1929.24	2094.72	1986.68	2223.5
tr|S4R1P5|S4R1P5_MOUSE	Dst	Dystonin OS=Mus musculus OX=10090 GN=Dst PE=1 SV=1	93	15	C	UR	1923.92	1373.13	1167.12	1815.63	1322.12	2066.74	880.447	1508.56	1783.35	1605.63	1575.83
sp|Q9D8B3|CHM4B_MOUSE	Chmp4b	Charged multivesicular body protein 4b OS=Mus musculus OX=10090 GN=Chmp4b PE=1 SV=2	94	8	C	UR	1803.45	1463.09	1384.55	1380.67	1836.21	1355.16	1312.02	2109.86	1376.43	1540.04	2322.2
sp|Q8BNU0|ARMC6_MOUSE	Armc6	Armadillo repeat-containing protein 6 OS=Mus musculus OX=10090 GN=Armc6 PE=1 SV=1	95	1	C	UR	357.552	310.955	108.526	477.858	317.305	397.523	85.5934	511.233	686.268	568.344	515.326
sp|Q80XL6|ACD11_MOUSE	Acad11	Acyl-CoA dehydrogenase family member 11 OS=Mus musculus OX=10090 GN=Acad11 PE=1 SV=2	96	9	C	UR	1424.49	1324.51	2129.9	1098.23	324.679	837.564	1204.97	422.99	716.884	531.534	400.245
sp|P59326|YTHD1_MOUSE	Ythdf1	YTH domain-containing family protein 1 OS=Mus musculus OX=10090 GN=Ythdf1 PE=1 SV=1	97	1	C	UR	243.889	148.291	260.07	236.658	222.198	348.279	244.941	436.063	280.364	376.701	295.88
sp|Q8R0X7|SGPL1_MOUSE	Sgpl1	Sphingosine-1-phosphate lyase 1 OS=Mus musculus OX=10090 GN=Sgpl1 PE=1 SV=1	98	7	C	UR	1297.26	922.659	3377.98	1537.3	469.57	1415.57	2724.68	676.806	1013.22	873.903	682.139
sp|Q9CR57|RL14_MOUSE	Rpl14	60S ribosomal protein L14 OS=Mus musculus OX=10090 GN=Rpl14 PE=1 SV=3	99	3	C	UR	665.981	637.075	95.5708	653.47	518.235	1007.39	205.157	1798.04	1495.12	1323.82	1875.9
sp|Q8C2Q3|RBM14_MOUSE	Rbm14	RNA-binding protein 14 OS=Mus musculus OX=10090 GN=Rbm14 PE=1 SV=1	100	5	C	UR	1682.01	715.887	434.271	1197.3	646.717	1951.52	931.664	1250.67	1325.37	1347.4	1135.74
sp|Q8C7Q4|RBM4_MOUSE	Rbm4	RNA-binding protein 4 OS=Mus musculus OX=10090 GN=Rbm4 PE=1 SV=1	100	2	C	UR	202.008	194.65	121.91	198.131	242.701	251.462	130.929	363.702	321.073	349.78	297.421
tr|E9Q5Z6|E9Q5Z6_MOUSE	Adh6a	Alcohol dehydrogenase 6A (class V) OS=Mus musculus OX=10090 GN=Adh6a PE=1 SV=1	101	6	C	UR	2068.43	1341.16	1845.06	992.755	596.924	1523.82	2049.31	1698.15	1831.12	1425.76	1704.48
sp|P16858|G3P_MOUSE	Gapdh	Glyceraldehyde-3-phosphate dehydrogenase OS=Mus musculus OX=10090 GN=Gapdh PE=1 SV=2	102	14	C	UR	1978.53	1475.37	1991.68	1920.93	1251.87	2365.23	2277.14	2124.6	2133.56	2653.48	1799.51
sp|Q64467|G3PT_MOUSE	Gapdhs	Glyceraldehyde-3-phosphate dehydrogenase, testis-specific OS=Mus musculus OX=10090 GN=Gapdhs PE=1 SV=1	102	3	C	UR	656.427	272.326	1340.55	418.688	358.511	462.403	695.126	520.774	458.641	583.165	413.146
tr|S4R1W8|S4R1W8_MOUSE	Gapdh	Glyceraldehyde-3-phosphate dehydrogenase (Fragment) OS=Mus musculus OX=10090 GN=Gapdh PE=1 SV=1	102	2	C	UR	109.548	98.4942	459.406	159.302	62.0011	70.969	259.794	61.6361	69.7065	79.8976	80.5054
sp|P56959|FUS_MOUSE	Fus	RNA-binding protein FUS OS=Mus musculus OX=10090 GN=Fus PE=1 SV=1	103	2	C	UR	224.133	162.409	30.872	223.328	194.602	257.781	29.1758	421.883	293.832	280.777	295.576
sp|Q3THS6|METK2_MOUSE	Mat2a	S-adenosylmethionine synthase isoform type-2 OS=Mus musculus OX=10090 GN=Mat2a PE=1 SV=2	104	16	C	UR	1657.6	2350.14	2396.44	2066.18	2111.58	1581.89	3654.3	2207.98	2079.81	2057.54	2239.18
sp|Q9DCG6|PBLD1_MOUSE	Pbld1	Phenazine biosynthesis-like domain-containing protein 1 OS=Mus musculus OX=10090 GN=Pbld1 PE=1 SV=2	105	4	C	UR	326.757	402.452	946.154	274.413	469.438	171.385	1008.03	267.164	158.176	240.169	247.526
sp|Q9CXN7|PBLD2_MOUSE	Pbld2	Phenazine biosynthesis-like domain-containing protein 2 OS=Mus musculus OX=10090 GN=Pbld2 PE=1 SV=1	105	5	C	UR	736.059	851.674	659.266	572.868	1057.31	432.087	970.474	616.745	379.864	565.093	570.766
sp|A2AKG8|FOCAD_MOUSE	Focad	Focadhesin OS=Mus musculus OX=10090 GN=Focad PE=1 SV=1	106	5	C	UR	198.107	163.209	108.22	205.835	163.929	216.236	75.8987	177.197	214.112	184.388	147.048
sp|Q8BWQ6|VP35L_MOUSE	Vps35l	VPS35 endosomal protein sorting factor-like OS=Mus musculus OX=10090 GN=Vps35l PE=1 SV=2	107	6	C	UR	678.821	513.933	445.816	823.09	619.935	979.573	378.072	736.905	735.868	756.128	574.95
sp|Q8BZQ2|CRLD2_MOUSE	Crispld2	Cysteine-rich secretory protein LCCL domain-containing 2 OS=Mus musculus OX=10090 GN=Crispld2 PE=1 SV=1	108	3	C	UR	477.541	246.735	516.037	244.111	190.633	465.086	398.254	178.49	517.446	397.668	214.032
sp|P67778|PHB_MOUSE	Phb	Prohibitin OS=Mus musculus OX=10090 GN=Phb PE=1 SV=1	109	10	C	UR	823.235	1155.13	887.936	1003.02	1075.53	650.531	1021.92	884.769	635.326	710.21	967.249
sp|Q6WKZ8|UBR2_MOUSE	Ubr2	E3 ubiquitin-protein ligase UBR2 OS=Mus musculus OX=10090 GN=Ubr2 PE=1 SV=2	110	7	C	UR	678.604	662.345	567.127	680.981	532.454	725.466	434.97	595.266	667.77	549.581	565.347
sp|Q8BGV8|MID51_MOUSE	Mief1	Mitochondrial dynamics protein MID51 OS=Mus musculus OX=10090 GN=Mief1 PE=1 SV=1	111	5	C	UR	589.74	656.362	75.7597	523.887	434.208	506.99	97.0962	408.83	588.479	471.003	475.318
sp|Q8BP40|PPA6_MOUSE	Acp6	Lysophosphatidic acid phosphatase type 6 OS=Mus musculus OX=10090 GN=Acp6 PE=1 SV=1	112	6	C	UR	1785.25	1632.5	954.994	1413.79	1975.33	984.56	492.921	1215.41	952.97	954.265	1410.44
sp|Q9JIK5|DDX21_MOUSE	Ddx21	Nucleolar RNA helicase 2 OS=Mus musculus OX=10090 GN=Ddx21 PE=1 SV=3	113	7	C	UR	1412.36	1465.73	775.088	1899.73	1024.74	1550.17	850.02	1733.94	2173.37	1781.17	1562.78
sp|O54965|RNF13_MOUSE	Rnf13	E3 ubiquitin-protein ligase RNF13 OS=Mus musculus OX=10090 GN=Rnf13 PE=1 SV=2	115	3	C	UR	151.859	128.072	415.195	116.875	125.212	86.0978	551.835	111.15	74.8083	95.0192	93.7288
sp|Q2KN98|CYTSA_MOUSE	Specc1l	Cytospin-A OS=Mus musculus OX=10090 GN=Specc1l PE=1 SV=1	116	6	C	UR	768.749	481.258	187.841	731.738	819.672	717.24	299.365	1048.99	938.14	1047.66	1086.38
sp|Q3UMY5|EMAL4_MOUSE	Eml4	Echinoderm microtubule-associated protein-like 4 OS=Mus musculus OX=10090 GN=Eml4 PE=1 SV=1	117	9	C	UR	1487.63	1506.23	1037.43	1326.48	1694.57	1085.93	1634.53	1528.47	1410.26	1160.33	1506.66
sp|Q61205|PA1B3_MOUSE	Pafah1b3	Platelet-activating factor acetylhydrolase IB subunit gamma OS=Mus musculus OX=10090 GN=Pafah1b3 PE=1 SV=1	118	2	C	UR	185.058	207.464	134.807	166.868	273.057	138.29	106.532	215.478	166.463	156.32	180.552
sp|P63300|SELW_MOUSE	Selenow	Selenoprotein W OS=Mus musculus OX=10090 GN=Selenow PE=1 SV=3	119	2	C	UR	662.597	808.09	889.587	585.706	561.862	877.53	312.701	402.903	611.648	589.988	524.928
sp|Q8BVI4|DHPR_MOUSE	Qdpr	Dihydropteridine reductase OS=Mus musculus OX=10090 GN=Qdpr PE=1 SV=2	120	8	C	UR	779.376	780.767	117.078	404.76	1076.79	438.45	53.9039	641.181	537.698	570.139	578.748
sp|Q9CZN7|GLYM_MOUSE	Shmt2	Serine hydroxymethyltransferase, mitochondrial OS=Mus musculus OX=10090 GN=Shmt2 PE=1 SV=1	121	9	C	UR	986.442	848.43	970.706	1198.03	1541.46	918.459	801.381	1251.58	1256.81	1011.65	1104.32
sp|P50431|GLYC_MOUSE	Shmt1	Serine hydroxymethyltransferase, cytosolic OS=Mus musculus OX=10090 GN=Shmt1 PE=1 SV=3	121	9	C	UR	1566.58	1013.85	374.102	1376.75	2329.56	1335.9	629.392	1865.61	919.565	1179.33	1379.18
sp|Q9Z0H4-9|CELF2_MOUSE	Celf2	Isoform 9 of CUGBP Elav-like family member 2 OS=Mus musculus OX=10090 GN=Celf2	122	2	C	UR	286.254	342.693	77.2877	227.123	300.862	400.96	144.438	509.592	838.596	736.498	451.656
sp|Q9DB15|RM12_MOUSE	Mrpl12	39S ribosomal protein L12, mitochondrial OS=Mus musculus OX=10090 GN=Mrpl12 PE=1 SV=2	123	4	C	UR	209.669	395.204	58.1305	398.568	852.376	201.457	33.2563	557.572	407.474	473.013	941.969
sp|P19001|K1C19_MOUSE	Krt19	Keratin, type I cytoskeletal 19 OS=Mus musculus OX=10090 GN=Krt19 PE=1 SV=1	124	23	C	UR	2913.96	1887.79	1721.93	2854.43	1851.95	2853.35	2801.16	3376.49	3647.79	4696.29	5120.35
sp|O76013|KRT36_HUMAN_contaminant	KRT36	Keratin, type I cuticular Ha6 OS=Homo sapiens GN=KRT36 PE=1 SV=1	124	3	C	UR	96.413	98.162	191.473	294.903	60.0198	82.407	432.559	116.544	227.551	123.306	241.952
sp|P02533|K1C14_HUMAN_contaminant	KRT14	Keratin, type I cytoskeletal 14 OS=Homo sapiens GN=KRT14 PE=1 SV=4	124	6	C	UR	634.973	614.954	1132.89	669.22	271.811	332.048	1714.93	545.61	367.963	392.836	463.432
sp|Q61781|K1C14_MOUSE	Krt14	Keratin, type I cytoskeletal 14 OS=Mus musculus OX=10090 GN=Krt14 PE=1 SV=2	124	4	C	UR	172.262	263.697	103.22	576.74	74.2248	91.7316	205.457	405.82	349.932	273.259	407.311
sp|P13645|K1C10_HUMAN_contaminant	KRT10	Keratin, type I cytoskeletal 10 OS=Homo sapiens GN=KRT10 PE=1 SV=6	124	15	C	UR	1164.45	2580.4	693.983	677.314	448.049	293.574	1593.68	1728.73	2412.99	546.587	240.541
sp|P08779|K1C16_HUMAN_contaminant	KRT16	Keratin, type I cytoskeletal 16 OS=Homo sapiens GN=KRT16 PE=1 SV=4	124	14	C	UR	1823.14	1930.21	1436.89	1100.61	650.726	608.096	1997.83	1465.84	1129.09	914.363	1178.29
sp|P13646|K1C13_HUMAN_contaminant	KRT13	Keratin, type I cytoskeletal 13 OS=Homo sapiens GN=KRT13 PE=1 SV=4	124	3	C	UR	193.533	189.381	621.404	234.585	78.6374	72.6193	449.359	107.541	102.1	102.571	129.178
sp|P02535|K1C10_MOUSE	Krt10	Keratin, type I cytoskeletal 10 OS=Mus musculus OX=10090 GN=Krt10 PE=1 SV=3	124	1	C	UR	84.8218	62.6029	242.097	110.053	10.8186	14.7031	62.8141	28.509	20.7568	24.8854	22.9121
sp|P05784|K1C18_MOUSE	Krt18	Keratin, type I cytoskeletal 18 OS=Mus musculus OX=10090 GN=Krt18 PE=1 SV=5	124	14	C	UR	1607.38	970.254	316.187	2077.86	1964.8	1731.16	557.15	2250.87	2979.64	3804.67	5077.54
sp|Q04695|K1C17_HUMAN_contaminant	KRT17	Keratin, type I cytoskeletal 17 OS=Homo sapiens GN=KRT17 PE=1 SV=2	124	2	C	UR	324.075	293.718	336.93	315.784	138.059	151.204	626.188	233.56	254.268	195.498	283.161
sp|Q9D312|K1C20_MOUSE	Krt20	Keratin, type I cytoskeletal 20 OS=Mus musculus OX=10090 GN=Krt20 PE=1 SV=1	124	18	C	UR	2024.62	1046.02	393.218	1947.59	1158.84	1107.27	421.705	1721.23	2298.64	2995.07	3161.09
sp|P08730|K1C13_MOUSE	Krt13	Keratin, type I cytoskeletal 13 OS=Mus musculus OX=10090 GN=Krt13 PE=1 SV=2	124	3	C	UR	292.592	137.365	1048.23	458.799	103.547	87.9748	706.963	412.901	252.188	164.581	422.367
sp|P35527|K1C9_HUMAN_contaminant	KRT9	Keratin, type I cytoskeletal 9 OS=Homo sapiens GN=KRT9 PE=1 SV=3	124	14	C	UR	3064.65	4765.97	1056.17	1071.07	1008.57	739.561	1940.58	2789.14	1397.63	417.378	212.526
sp|Q61414|K1C15_MOUSE	Krt15	Keratin, type I cytoskeletal 15 OS=Mus musculus OX=10090 GN=Krt15 PE=1 SV=2	124	3	C	UR	430.832	208.727	225.201	556.648	212.96	231.411	258.571	542.576	409.116	368.109	709.118
sp|P05783|K1C18_HUMAN_contaminant	KRT18	Keratin, type I cytoskeletal 18 OS=Homo sapiens GN=KRT18 PE=1 SV=2	124	6	C	UR	1349.89	920.872	628.029	1405.56	1194.28	972.384	1019.33	1341.77	1308.99	1430.36	1997.98
sp|Q6P4T2|U520_MOUSE	Snrnp200	U5 small nuclear ribonucleoprotein 200 kDa helicase OS=Mus musculus OX=10090 GN=Snrnp200 PE=1 SV=1	125	21	C	UR	4287.38	4246.11	675.415	3904.07	4685.79	3896.64	795.372	4752.62	4466.53	4142.52	4533.96
sp|Q8K182|CO8A_MOUSE	C8a	Complement component C8 alpha chain OS=Mus musculus OX=10090 GN=C8a PE=1 SV=1	126	7	C	UR	1201.09	1530.54	1555.83	1321.69	1280.42	988.318	1026.52	1227.97	1759.58	1501.69	1828.63
sp|Q91YE5-3|BAZ2A_MOUSE	Baz2a	Isoform 3 of Bromodomain adjacent to zinc finger domain protein 2A OS=Mus musculus OX=10090 GN=Baz2a	127	4	C	UR	542.361	472.954	322.334	677.55	523.915	483.262	219.156	497.088	578.536	442.635	506.59
sp|Q9ESK9|RBCC1_MOUSE	Rb1cc1	RB1-inducible coiled-coil protein 1 OS=Mus musculus OX=10090 GN=Rb1cc1 PE=1 SV=3	128	1	C	UR	119.278	108.013	43.9791	122.482	50.3366	113.334	29.4472	80.5992	120.806	101.995	71.3878
sp|B9EJR8|DAAF5_MOUSE	Dnaaf5	Dynein assembly factor 5, axonemal OS=Mus musculus OX=10090 GN=Dnaaf5 PE=1 SV=1	129	1	C	UR	97.3944	92.8118	35.1122	133.321	63.4896	130.118	19.333	83.0459	135.07	102.767	86.3672
sp|A2AX52|CO6A4_MOUSE	Col6a4	Collagen alpha-4(VI) chain OS=Mus musculus OX=10090 GN=Col6a4 PE=1 SV=2	130	6	C	UR	165.557	226.631	665.066	196.387	149.307	653.038	1160.21	199.107	440.358	229.872	168.639
tr|A0A571BF69|A0A571BF69_MOUSE	Mgam	Maltase-glucoamylase OS=Mus musculus OX=10090 GN=Mgam PE=1 SV=1	131	20	C	UR	3177.42	2833.19	5874.98	1822.88	1960.2	1984.2	4806.44	2556.87	3250.84	2544.45	3363.84
tr|F8VQM5|F8VQM5_MOUSE	Sis	Sucrase isomaltase (alpha-glucosidase) OS=Mus musculus OX=10090 GN=Sis PE=1 SV=1	131	16	C	UR	1563.94	1261.67	1985.42	1380.37	1167.17	2510.65	2246.77	1287.23	1169.51	877.21	1628.93
tr|A0A571BDS5|A0A571BDS5_MOUSE	Mgam2-ps	Maltase-glucoamylase 2, pseudogene OS=Mus musculus OX=10090 GN=Mgam2-ps PE=1 SV=1	131	1	C	UR	51.5077	53.4043	62.317	50.0226	40.6699	20.6703	161.732	36.0894	26.0819	29.3088	56.078
sp|Q78T54|VMA21_MOUSE	Vma21	Vacuolar ATPase assembly integral membrane protein Vma21 OS=Mus musculus OX=10090 GN=Vma21 PE=1 SV=1	132	2	C	UR	53.7697	70.3197	174.909	85.7057	36.2884	58.1799	156.992	100.594	103.427	123.749	48.5205
sp|P70441|NHRF1_MOUSE	Slc9a3r1	Na(+)/H(+) exchange regulatory cofactor NHE-RF1 OS=Mus musculus OX=10090 GN=Slc9a3r1 PE=1 SV=3	133	7	C	UR	1437.97	2228.1	1930.68	1555.54	2298.05	1156.8	916.928	1647.18	1682.93	1839.18	2339.95
tr|F8VPK0|F8VPK0_MOUSE	Ttc37	Tetratricopeptide repeat domain 37 OS=Mus musculus OX=10090 GN=Ttc37 PE=1 SV=1	134	9	C	UR	523.076	433.015	249.634	525.737	466.002	629.993	170.661	532.481	526.751	506.12	489.021
sp|Q921F4|HNRLL_MOUSE	Hnrnpll	Heterogeneous nuclear ribonucleoprotein L-like OS=Mus musculus OX=10090 GN=Hnrnpll PE=1 SV=3	135	5	C	UR	751.533	768.045	129.947	468.131	684.135	605.741	76.1618	639.714	740.738	639.305	684.413
tr|V9GXB6|V9GXB6_MOUSE	Hnrnpll	Heterogeneous nuclear ribonucleoprotein L-like OS=Mus musculus OX=10090 GN=Hnrnpll PE=1 SV=1	135	1	C	UR	23.5339	68.2172	10.5038	32.0326	30.9576	15.0941	6.31528	42.3937	22.9856	21.5652	26.903
sp|O88593|PGRP1_MOUSE	Pglyrp1	Peptidoglycan recognition protein 1 OS=Mus musculus OX=10090 GN=Pglyrp1 PE=1 SV=1	136	3	C	UR	191.76	378.096	958.564	189.549	227.416	108.028	638.606	116.33	108.671	109.595	203.235
sp|P28740-1|KIF2A_MOUSE	Kif2a	Isoform 1 of Kinesin-like protein KIF2A OS=Mus musculus OX=10090 GN=Kif2a	137	8	C	UR	806.087	555.588	434.796	910.035	522.456	804.419	552.438	829.612	1027.38	825.498	681.059
sp|P62852|RS25_MOUSE	Rps25	40S ribosomal protein S25 OS=Mus musculus OX=10090 GN=Rps25 PE=1 SV=1	138	7	C	UR	1087.51	1153.39	535.96	1325.57	1173.4	948.708	799.788	1217.2	1192.72	852.648	1185.64
sp|Q8VBT9|ASPC1_MOUSE	Aspscr1	Tether containing UBX domain for GLUT4 OS=Mus musculus OX=10090 GN=Aspscr1 PE=1 SV=1	139	4	C	UR	635.619	767.976	493.255	701.022	643.841	670.581	243.476	712.341	670.172	686.822	575.599
sp|Q9D0D4|DIM1_MOUSE	Dimt1	Probable dimethyladenosine transferase OS=Mus musculus OX=10090 GN=Dimt1 PE=2 SV=1	140	1	C	UR	155.488	197.89	326.101	240.023	192.174	218.76	428.784	208.348	257.222	202.118	198.325
sp|Q9EPK7|XPO7_MOUSE	Xpo7	Exportin-7 OS=Mus musculus OX=10090 GN=Xpo7 PE=1 SV=3	141	9	C	UR	1197.22	697.999	1094.8	1225.95	917.107	1779.99	777.415	1060.69	1298.04	1024.94	965.486
sp|Q91W34|RUSF1_MOUSE	Rusf1	RUS family member 1 OS=Mus musculus OX=10090 GN=Rusf1 PE=1 SV=1	142	1	C	UR	195.232	110.438	88.105	231.3	66.5089	275.52	109.883	103.505	158.315	159.713	89.8045
sp|Q922F4|TBB6_MOUSE	Tubb6	Tubulin beta-6 chain OS=Mus musculus OX=10090 GN=Tubb6 PE=1 SV=1	143	8	C	UR	487.832	509.704	117.146	705.018	333.767	1406.66	108.894	642.311	1069.6	1045.69	522.594
sp|Q9ERD7|TBB3_MOUSE	Tubb3	Tubulin beta-3 chain OS=Mus musculus OX=10090 GN=Tubb3 PE=1 SV=1	143	10	C	UR	759.221	494.708	186.009	821.631	408.894	1202.62	133.865	628.455	893.754	806.791	700.076
sp|Q7TMM9|TBB2A_MOUSE	Tubb2a	Tubulin beta-2A chain OS=Mus musculus OX=10090 GN=Tubb2a PE=1 SV=1	143	2	C	UR	136.605	137.747	546.07	230.982	69.4336	291.902	547.725	136.208	232.357	226.766	133.664
sp|P99024|TBB5_MOUSE	Tubb5	Tubulin beta-5 chain OS=Mus musculus OX=10090 GN=Tubb5 PE=1 SV=1	143	1	C	UR	48.3736	84.9334	11.7603	126.962	42.6109	115.725	3.7357	103.882	85.3376	96.7666	55.2344
sp|P68372|TBB4B_MOUSE	Tubb4b	Tubulin beta-4B chain OS=Mus musculus OX=10090 GN=Tubb4b PE=1 SV=1	143	12	C	UR	926.405	959.407	393.147	1336.89	517.439	1374.13	339.538	1028.06	1500.24	1130.25	805.986
sp|Q9D6F9|TBB4A_MOUSE	Tubb4a	Tubulin beta-4A chain OS=Mus musculus OX=10090 GN=Tubb4a PE=1 SV=3	143	1	C	UR	8.62969	9.12905	1.89157	13.9401	0	65.5624	2.47137	9.60426	33.1296	30.3602	8.34494
sp|Q80Z96|VANG1_MOUSE	Vangl1	Vang-like protein 1 OS=Mus musculus OX=10090 GN=Vangl1 PE=1 SV=2	144	2	C	UR	41.2414	41.8523	173.335	60.0115	30.6746	57.9267	146.235	43.8408	60.7678	41.9992	41.0913
sp|Q9JL62|GLTP_MOUSE	Gltp	Glycolipid transfer protein OS=Mus musculus OX=10090 GN=Gltp PE=1 SV=3	145	2	C	UR	667.779	586.848	192.377	612.381	526.23	480.803	171.242	422.835	470.421	421.991	444.899
sp|Q8BGZ4|CDC23_MOUSE	Cdc23	Cell division cycle protein 23 homolog OS=Mus musculus OX=10090 GN=Cdc23 PE=1 SV=2	146	4	C	UR	1017.51	1016.54	513.133	1596.12	947.176	1717.77	458.699	1345	1619.09	1348.14	1203.1
sp|Q7TT37|ELP1_MOUSE	Elp1	Elongator complex protein 1 OS=Mus musculus OX=10090 GN=Elp1 PE=1 SV=2	147	5	C	UR	904.876	901.968	687.429	1261.56	696.035	1130.51	498.58	846.475	1057.49	792.423	813.111
tr|E9QNN1|E9QNN1_MOUSE	Dhx9	ATP-dependent RNA helicase A OS=Mus musculus OX=10090 GN=Dhx9 PE=1 SV=1	148	20	C	UR	2869.61	2288.31	1277.5	3374.65	2345.71	4116.62	1282.28	3602.77	3281.47	2978.43	2727.29
sp|P26039|TLN1_MOUSE	Tln1	Talin-1 OS=Mus musculus OX=10090 GN=Tln1 PE=1 SV=2	149	22	C	UR	2448.9	2793.18	1165.54	2473.73	2164.98	3580.82	1043.11	2674.93	3777.62	4393.98	2629.84
tr|A0A1L1SQ51|A0A1L1SQ51_MOUSE	Tln2	Talin-2 OS=Mus musculus OX=10090 GN=Tln2 PE=1 SV=1	149	13	C	UR	1056.35	1403.88	852.539	1255.03	1166.85	1861.95	1189.07	1322.89	1814.66	1573.77	1416.04
sp|Q9CPR4|RL17_MOUSE	Rpl17	60S ribosomal protein L17 OS=Mus musculus OX=10090 GN=Rpl17 PE=1 SV=3	149	9	C	UR	1823.94	2053.3	721.501	2602.08	1625.86	2328.31	1003.18	3103.64	2699.69	2575.95	2488.3
sp|Q02248|CTNB1_MOUSE	Ctnnb1	Catenin beta-1 OS=Mus musculus OX=10090 GN=Ctnnb1 PE=1 SV=1	150	18	C	UR	3368.74	2851.52	1340.33	3499.27	2821.75	2323.45	967.349	2691.06	3044.08	2503.7	3364.5
sp|Q02257|PLAK_MOUSE	Jup	Junction plakoglobin OS=Mus musculus OX=10090 GN=Jup PE=1 SV=3	150	19	C	UR	2619.65	2647.17	643.898	3553.62	1878.55	2658.32	645.575	2900	3901.72	2592.22	3132.22
sp|Q8BU33|HACL2_MOUSE	Ilvbl	2-hydroxyacyl-CoA lyase 2 OS=Mus musculus OX=10090 GN=Ilvbl PE=1 SV=1	151	7	C	UR	856.207	705.142	541.55	705.841	238.564	634.861	617.519	310.541	433.811	407.176	361.544
sp|Q6PDN3|MYLK_MOUSE	Mylk	Myosin light chain kinase, smooth muscle OS=Mus musculus OX=10090 GN=Mylk PE=1 SV=3	152	19	C	UR	1555.07	1544.41	1699.54	1766.6	1367.02	7506.98	3964.29	1364.67	1739.32	2827.25	1087.88
sp|P47811|MK14_MOUSE	Mapk14	Mitogen-activated protein kinase 14 OS=Mus musculus OX=10090 GN=Mapk14 PE=1 SV=3	152	3	C	UR	671.621	320.647	110.914	421.523	790.983	609.454	141.434	518.166	584.157	554.486	540.09
sp|Q9Z1B7|MK13_MOUSE	Mapk13	Mitogen-activated protein kinase 13 OS=Mus musculus OX=10090 GN=Mapk13 PE=1 SV=2	152	7	C	UR	1158.71	873.645	604.882	1018.93	843.967	1720.51	427.061	1718.65	1340.84	1373.76	1317.17
sp|Q9WTU6|MK09_MOUSE	Mapk9	Mitogen-activated protein kinase 9 OS=Mus musculus OX=10090 GN=Mapk9 PE=1 SV=2	152	3	C	UR	380.695	292.016	83.4631	301.734	298.273	338.742	82.7945	319.373	294.478	295.511	264.562
sp|Q8BWT1|THIM_MOUSE	Acaa2	3-ketoacyl-CoA thiolase, mitochondrial OS=Mus musculus OX=10090 GN=Acaa2 PE=1 SV=3	153	8	C	UR	513.462	529.683	726.804	465.963	353.208	710.192	1104.65	323.287	344.017	344.193	264.522
sp|Q9DCE5|PK1IP_MOUSE	Pak1ip1	p21-activated protein kinase-interacting protein 1 OS=Mus musculus OX=10090 GN=Pak1ip1 PE=1 SV=2	154	3	C	UR	499.646	566.968	307.339	662.77	576.917	555.637	410.473	655.199	616.209	542.05	513.133
sp|Q91WD4|CG025_MOUSE		UPF0415 protein C7orf25 homolog OS=Mus musculus OX=10090 PE=2 SV=1	155	2	C	UR	144.122	239.489	86.8736	132.933	262.718	156.77	53.1598	244.874	219.2	185.778	182.746
sp|Q80UJ7|RB3GP_MOUSE	Rab3gap1	Rab3 GTPase-activating protein catalytic subunit OS=Mus musculus OX=10090 GN=Rab3gap1 PE=1 SV=4	156	6	C	UR	276.029	221.151	71.2282	289.982	228.287	300.844	96.4134	321.401	357.167	346.437	282.164
sp|Q8CJ00|NOXA1_MOUSE	Noxa1	NADPH oxidase activator 1 OS=Mus musculus OX=10090 GN=Noxa1 PE=1 SV=1	157	4	C	UR	510.637	402.475	388.369	506.128	350.725	757.079	293.266	460.617	485.242	484.678	332.958
sp|Q99KH8|STK24_MOUSE	Stk24	Serine/threonine-protein kinase 24 OS=Mus musculus OX=10090 GN=Stk24 PE=1 SV=1	158	4	C	UR	795.813	292.072	291.568	371.26	920.783	840.53	261.494	571.785	410.672	465.815	495.183
sp|P25911|LYN_MOUSE	Lyn	Tyrosine-protein kinase Lyn OS=Mus musculus OX=10090 GN=Lyn PE=1 SV=4	159	3	C	UR	390.113	381.39	251.12	458.334	386.84	519.753	360.576	421.135	688.794	579.009	589.048
sp|P08103|HCK_MOUSE	Hck	Tyrosine-protein kinase HCK OS=Mus musculus OX=10090 GN=Hck PE=1 SV=4	159	2	C	UR	234.907	345.63	291.148	387.633	211.422	374.653	302.677	309.273	649.096	628.114	317.515
sp|P05480|SRC_MOUSE	Src	Neuronal proto-oncogene tyrosine-protein kinase Src OS=Mus musculus OX=10090 GN=Src PE=1 SV=4	159	2	C	UR	78.5557	72.7642	53.8099	89.1311	66.0327	80.8706	42.8797	75.2587	71.4685	71.3147	69.167
sp|Q9JKY5|HIP1R_MOUSE	Hip1r	Huntingtin-interacting protein 1-related protein OS=Mus musculus OX=10090 GN=Hip1r PE=1 SV=2	160	18	C	UR	1874.53	1558.67	764.46	1678.21	2269.77	1794.59	492.129	2678.66	1999.35	2140.3	2180.28
sp|Q8BMF4|ODP2_MOUSE	Dlat	Dihydrolipoyllysine-residue acetyltransferase component of pyruvate dehydrogenase complex, mitochondrial OS=Mus musculus OX=10090 GN=Dlat PE=1 SV=2	161	5	C	UR	2034	2586.82	200.236	1890.67	2142.5	1797.44	326.174	1709.44	1479.64	1605.95	2012.27
sp|E9Q634|MYO1E_MOUSE	Myo1e	Unconventional myosin-Ie OS=Mus musculus OX=10090 GN=Myo1e PE=1 SV=1	162	11	C	UR	2264.78	1800.72	1397.13	2289.39	1497.47	2037.88	1123.42	2014.95	2546.6	2098.25	2438.73
sp|P70248|MYO1F_MOUSE	Myo1f	Unconventional myosin-If OS=Mus musculus OX=10090 GN=Myo1f PE=1 SV=1	162	3	C	UR	144.307	133.904	191.91	232.744	156.812	238.194	148.792	257.576	520.803	533.865	207.869
sp|P97300|NPTN_MOUSE	Nptn	Neuroplastin OS=Mus musculus OX=10090 GN=Nptn PE=1 SV=3	163	8	C	UR	1334.24	1511.92	4185.24	1466.33	961.175	1318.97	4439.4	878.571	696.028	946.416	901.513
sp|Q9D819|IPYR_MOUSE	Ppa1	Inorganic pyrophosphatase OS=Mus musculus OX=10090 GN=Ppa1 PE=1 SV=1	164	12	C	UR	1826.05	3248.67	238.439	1912.22	4026.97	1296.68	213.661	2878.71	1850.4	1909.02	2724.63
sp|Q9Z120|TRMB_MOUSE	Mettl1	tRNA (guanine-N(7)-)-methyltransferase OS=Mus musculus OX=10090 GN=Mettl1 PE=1 SV=1	165	1	C	UR	14.7899	9.52292	7.74501	22.3894	22.6884	23.2305	6.35695	25.7062	31.0537	16.6602	20.0922
sp|O89020|AFAM_MOUSE	Afm	Afamin OS=Mus musculus OX=10090 GN=Afm PE=1 SV=2	166	11	C	UR	773.313	821.832	279.394	783.222	1363.31	676.829	170.741	1184.82	1659.24	1226.08	1928.34
sp|Q91WG5|AAKG2_MOUSE	Prkag2	5'-AMP-activated protein kinase subunit gamma-2 OS=Mus musculus OX=10090 GN=Prkag2 PE=1 SV=2	167	2	C	UR	364.826	323.414	330.028	390.879	230.92	328.606	215.792	215.463	271.883	267.656	219.433
sp|Q3TFD2|PCAT1_MOUSE	Lpcat1	Lysophosphatidylcholine acyltransferase 1 OS=Mus musculus OX=10090 GN=Lpcat1 PE=1 SV=1	168	1	C	UR	201.159	227.431	115.741	359.374	130.574	277.585	97.0515	158.944	328.308	254.827	155.574
sp|Q8VC30|TKFC_MOUSE	Tkfc	Triokinase/FMN cyclase OS=Mus musculus OX=10090 GN=Tkfc PE=1 SV=1	169	3	C	UR	1116.42	535.066	59.553	677.164	719.12	743.563	57.9062	641.869	671.303	701.69	533.056
sp|Q9JK91|MLH1_MOUSE	Mlh1	DNA mismatch repair protein Mlh1 OS=Mus musculus OX=10090 GN=Mlh1 PE=1 SV=2	170	1	C	UR	34.0917	25.2913	28.5935	50.1098	22.5028	49.1909	24.8431	34.3368	43.2614	42.6807	30.0506
sp|P70697|DCUP_MOUSE	Urod	Uroporphyrinogen decarboxylase OS=Mus musculus OX=10090 GN=Urod PE=1 SV=2	171	3	C	UR	152.269	123.987	81.0466	148.475	122.46	172.839	38.7566	143.708	143.567	172.905	98.1232
sp|Q8C547|HTR5B_MOUSE	Heatr5b	HEAT repeat-containing protein 5B OS=Mus musculus OX=10090 GN=Heatr5b PE=1 SV=3	172	5	C	UR	520.707	356.825	479.638	573.444	412.507	663.735	278.848	530.967	611.942	521.947	497.979
tr|A6ZI44|A6ZI44_MOUSE	Aldoa	Fructose-bisphosphate aldolase OS=Mus musculus OX=10090 GN=Aldoa PE=1 SV=1	173	24	C	UR	2765.44	5759.52	1641.46	2327.88	3335.21	1977.06	2214.85	2534.43	1822.33	2066.13	2187.24
tr|D3Z510|D3Z510_MOUSE	Aldoa	Fructose-bisphosphate aldolase A (Fragment) OS=Mus musculus OX=10090 GN=Aldoa PE=1 SV=2	173	1	C	UR	61.5896	82.2159	38.2852	122.728	107.09	93.4287	108.43	89.4734	63.0773	65.9865	73.5331
sp|P05063|ALDOC_MOUSE	Aldoc	Fructose-bisphosphate aldolase C OS=Mus musculus OX=10090 GN=Aldoc PE=1 SV=4	173	10	C	UR	1434.26	1431.92	670.315	1088.46	1901.41	842.668	932.236	1114	1037.82	855.552	1173.68
sp|Q91Y97|ALDOB_MOUSE	Aldob	Fructose-bisphosphate aldolase B OS=Mus musculus OX=10090 GN=Aldob PE=1 SV=3	173	17	C	UR	4226	4151.14	591.899	2462.34	4319.73	2534.25	1151.93	3097.7	2308.15	2057.8	2505.56
sp|Q9JIG7|CCD22_MOUSE	Ccdc22	Coiled-coil domain-containing protein 22 OS=Mus musculus OX=10090 GN=Ccdc22 PE=1 SV=1	174	5	C	UR	274.131	344.699	229.483	442.509	574.587	379.744	207.703	582.201	560.018	685.347	506.348
sp|Q6P5B0|RRP12_MOUSE	Rrp12	RRP12-like protein OS=Mus musculus OX=10090 GN=Rrp12 PE=1 SV=1	175	7	C	UR	858.796	934.445	1023.4	1463.84	548.366	1436.92	946.132	1154.54	1538.11	1098.46	871.938
tr|Q9D8C9|Q9D8C9_MOUSE	Pnp2	Purine nucleoside phosphorylase OS=Mus musculus OX=10090 GN=Pnp2 PE=1 SV=1	176	5	C	UR	93.8379	80.9366	105.649	57.4161	96.8259	48.0614	177.703	68.5968	50.6213	48.1664	74.8977
sp|P23492|PNPH_MOUSE	Pnp	Purine nucleoside phosphorylase OS=Mus musculus OX=10090 GN=Pnp PE=1 SV=2	176	13	C	UR	805.132	1775.22	855.829	1176.72	2094.23	1035.02	1205.96	1599.64	1868.65	1689.42	1599.31
sp|Q921G7|ETFD_MOUSE	Etfdh	Electron transfer flavoprotein-ubiquinone oxidoreductase, mitochondrial OS=Mus musculus OX=10090 GN=Etfdh PE=1 SV=1	177	14	C	UR	3728.67	2582.39	4949.57	3320.3	3362.33	2528.55	6147.57	2590.33	1469.33	1673.11	2368.72
sp|P62911|RL32_MOUSE	Rpl32	60S ribosomal protein L32 OS=Mus musculus OX=10090 GN=Rpl32 PE=1 SV=2	178	9	C	UR	451.93	973.391	403.999	785.584	742.526	416.665	361.555	762.582	963.26	713.996	746.72
sp|O08528|HXK2_MOUSE	Hk2	Hexokinase-2 OS=Mus musculus OX=10090 GN=Hk2 PE=1 SV=1	179	17	C	UR	3108.38	4024.62	871.3	3269.87	2403.83	3633.89	677.464	3976.93	4128.25	4339.36	3701.89
sp|P17710|HXK1_MOUSE	Hk1	Hexokinase-1 OS=Mus musculus OX=10090 GN=Hk1 PE=1 SV=3	179	18	C	UR	3366.09	4794	1914.78	3579.24	4119.46	3208.55	2141.91	3190.21	3128.97	2531.76	4198.95
sp|Q3TRM8|HXK3_MOUSE	Hk3	Hexokinase-3 OS=Mus musculus OX=10090 GN=Hk3 PE=1 SV=2	179	2	C	UR	179.801	249.903	139.256	297.664	96.0267	409.564	112.77	186.241	662.676	558.415	185.893
sp|Q91W97|HKDC1_MOUSE	Hkdc1	Hexokinase HKDC1 OS=Mus musculus OX=10090 GN=Hkdc1 PE=2 SV=1	179	2	C	UR	612.55	542.685	240.8	686.69	268.294	685.669	185.905	365.358	276.961	379.226	285.028
sp|Q9D7B6|ACAD8_MOUSE	Acad8	Isobutyryl-CoA dehydrogenase, mitochondrial OS=Mus musculus OX=10090 GN=Acad8 PE=1 SV=2	180	6	C	UR	515.033	797.52	653.744	539.076	564.483	489.157	394.071	523.867	492.655	497.419	533.421
sp|P02469|LAMB1_MOUSE	Lamb1	Laminin subunit beta-1 OS=Mus musculus OX=10090 GN=Lamb1 PE=1 SV=3	181	17	C	UR	1460.65	2202.01	7124.31	1330.54	1212.2	2262.04	7938.18	1024.81	1657.58	1388.08	879.778
sp|Q61292|LAMB2_MOUSE	Lamb2	Laminin subunit beta-2 OS=Mus musculus OX=10090 GN=Lamb2 PE=1 SV=2	181	13	C	UR	333.402	523.036	2304.28	403.06	264.22	1543.84	2939.12	234.717	390.306	513.515	192.661
sp|Q61249|IGBP1_MOUSE	Igbp1	Immunoglobulin-binding protein 1 OS=Mus musculus OX=10090 GN=Igbp1 PE=1 SV=1	182	1	C	UR	197.154	152.686	60.5958	219.759	341.328	256.454	35.304	316.374	324.552	293.868	323.507
sp|Q61087|LAMB3_MOUSE	Lamb3	Laminin subunit beta-3 OS=Mus musculus OX=10090 GN=Lamb3 PE=1 SV=2	183	16	C	UR	903.971	1082.48	1665.28	933.088	471.865	419.762	1642.49	464.187	524.796	351.091	693.573
sp|P46460|NSF_MOUSE	Nsf	Vesicle-fusing ATPase OS=Mus musculus OX=10090 GN=Nsf PE=1 SV=2	184	12	C	UR	1710.52	1298.61	884.426	1523.94	1083.99	1932.17	950.874	1849.92	1776.09	1923.2	1779.98
sp|Q93092|TALDO_MOUSE	Taldo1	Transaldolase OS=Mus musculus OX=10090 GN=Taldo1 PE=1 SV=2	185	17	C	UR	3477.76	4086	3194.2	2828.07	4369.71	2614.82	3093.4	3363.94	3150.22	2840.3	3047.19
sp|Q9D7Z6|CLCA1_MOUSE	Clca1	Calcium-activated chloride channel regulator 1 OS=Mus musculus OX=10090 GN=Clca1 PE=1 SV=2	186	19	C	UR	1685.86	3226.44	7181.38	1937.73	4221.36	1222.11	4965.93	1595.58	1999.92	1184.91	2394.06
tr|Q8K1M3|Q8K1M3_MOUSE	Prkar2a	Protein kinase, cAMP dependent regulatory, type II alpha OS=Mus musculus OX=10090 GN=Prkar2a PE=1 SV=1	187	7	C	UR	873.284	904.352	483.811	724.839	1199.84	946.977	297.74	1327.38	1036.3	1211.47	1220.04
sp|P31324|KAP3_MOUSE	Prkar2b	cAMP-dependent protein kinase type II-beta regulatory subunit OS=Mus musculus OX=10090 GN=Prkar2b PE=1 SV=3	187	3	C	UR	109.146	118.953	146.374	148.095	171.477	272.983	118.662	168.715	285.174	291.406	168.464
tr|E9Q411|E9Q411_MOUSE	Nbas	Neuroblastoma-amplified sequence OS=Mus musculus OX=10090 GN=Nbas PE=1 SV=1	188	6	C	UR	396.944	303.39	307.367	420.714	152.219	495.727	224.942	252.949	358.006	325.74	257.637
sp|P62259|1433E_MOUSE	Ywhae	14-3-3 protein epsilon OS=Mus musculus OX=10090 GN=Ywhae PE=1 SV=1	189	18	C	UR	3413.61	6454.27	1242.62	3216.13	4253.72	2587.05	1436.13	3540.22	2774.88	3168.08	3357.95
sp|P61982|1433G_MOUSE	Ywhag	14-3-3 protein gamma OS=Mus musculus OX=10090 GN=Ywhag PE=1 SV=2	189	6	C	UR	440.168	679.052	102.284	457.634	579.553	485.208	173.214	629.151	427.083	584.334	558.755
sp|P68510|1433F_MOUSE	Ywhah	14-3-3 protein eta OS=Mus musculus OX=10090 GN=Ywhah PE=1 SV=2	189	4	C	UR	674.196	572.181	313.231	480.994	1000.14	461.495	488.265	680.359	676.11	526.72	750.583
sp|P68254|1433T_MOUSE	Ywhaq	14-3-3 protein theta OS=Mus musculus OX=10090 GN=Ywhaq PE=1 SV=1	189	12	C	UR	969.057	1008.05	290.356	971.161	1585.06	1149.53	348.855	1332.07	1247.16	1081.64	1209.64
sp|Q9CQV8|1433B_MOUSE	Ywhab	14-3-3 protein beta/alpha OS=Mus musculus OX=10090 GN=Ywhab PE=1 SV=3	189	4	C	UR	568.85	323.079	233.487	444.061	937.097	655.449	143.148	891.626	583.732	609.526	710.956
sp|P63101|1433Z_MOUSE	Ywhaz	14-3-3 protein zeta/delta OS=Mus musculus OX=10090 GN=Ywhaz PE=1 SV=1	189	15	C	UR	2330.51	2954.91	573.747	1889.45	2820.56	1526.69	625.015	2179.36	1864.81	1776.92	2084.69
sp|O70456|1433S_MOUSE	Sfn	14-3-3 protein sigma OS=Mus musculus OX=10090 GN=Sfn PE=1 SV=2	189	13	C	UR	2702.01	2664.79	323.58	2106.85	3933.28	1601.04	294.698	3030.23	2228.14	2209.57	3635.16
sp|Q8C3X8|LMF2_MOUSE	Lmf2	Lipase maturation factor 2 OS=Mus musculus OX=10090 GN=Lmf2 PE=1 SV=1	190	2	C	UR	50.3005	60.7571	62.4627	59.4077	35.9195	59.6395	120.751	51.1812	55.8247	36.6563	34.5975
sp|P43276|H15_MOUSE	H1-5	Histone H1.5 OS=Mus musculus OX=10090 GN=H1-5 PE=1 SV=2	192	11	C	UR	245.321	473.88	517.681	346.846	1368.44	437.432	378.254	4716.99	6501.3	5335.99	5555.89
sp|P43274|H14_MOUSE	H1-4	Histone H1.4 OS=Mus musculus OX=10090 GN=H1-4 PE=1 SV=2	192	6	C	UR	705.765	620.511	312.333	417.135	1886.74	1125.25	260.015	3681.94	2860.86	3883.91	3268.12
sp|P15864|H12_MOUSE	H1-2	Histone H1.2 OS=Mus musculus OX=10090 GN=H1-2 PE=1 SV=2	192	4	C	UR	237.857	240.316	341.109	303.855	651.339	418.764	408.355	1688.81	2861.33	1703.54	1281.34
sp|P43275|H11_MOUSE	H1-1	Histone H1.1 OS=Mus musculus OX=10090 GN=H1-1 PE=1 SV=2	192	1	C	UR	7.50622	11.2611	4.07652	8.65515	61.0624	21.7055	7.92102	121.719	153.996	146.032	167.259
sp|P97429|ANXA4_MOUSE	Anxa4	Annexin A4 OS=Mus musculus OX=10090 GN=Anxa4 PE=1 SV=4	193	20	C	UR	1661.5	2009.63	5758.03	1945.74	1900.87	1099.38	4168.74	1472.6	1034.24	1094.01	1644.87
sp|P14824|ANXA6_MOUSE	Anxa6	Annexin A6 OS=Mus musculus OX=10090 GN=Anxa6 PE=1 SV=3	193	26	C	UR	2763.64	3122.33	11722.8	3396.96	2504.1	6064.33	6692.59	3154.24	4067.65	4300.27	2802.9
tr|F8WIT2|F8WIT2_MOUSE	Anxa6	Annexin OS=Mus musculus OX=10090 GN=Anxa6 PE=1 SV=1	193	2	C	UR	130.132	124.82	482.246	139.229	133.09	263.067	200.385	145.925	217.941	192.945	123.469
sp|P48036|ANXA5_MOUSE	Anxa5	Annexin A5 OS=Mus musculus OX=10090 GN=Anxa5 PE=1 SV=1	193	17	C	UR	2023.63	2150.34	6362.93	2037.62	2265.33	1731.15	4302.12	1447.48	2269.24	1980.42	1876.54
sp|Q8VCW8|ACSF2_MOUSE	Acsf2	Medium-chain acyl-CoA ligase ACSF2, mitochondrial OS=Mus musculus OX=10090 GN=Acsf2 PE=1 SV=1	194	14	C	UR	2003.96	1795.49	2402.54	2697.01	939.156	2512.7	1076.67	1583.18	1066.31	1692.52	1072.11
sp|Q9DB29|IAH1_MOUSE	Iah1	Isoamyl acetate-hydrolyzing esterase 1 homolog OS=Mus musculus OX=10090 GN=Iah1 PE=1 SV=1	195	7	C	UR	585.09	584.763	390.876	602.833	1137.1	609.953	140.916	643.995	525.892	523.574	638.656
sp|Q811D0-3|DLG1_MOUSE	Dlg1	Isoform 3 of Disks large homolog 1 OS=Mus musculus OX=10090 GN=Dlg1	196	5	C	UR	1340.06	1320.97	721.271	1118.68	1496.87	1082.27	614.026	1180.02	1085.2	1208.24	1309.95
sp|Q8BUH8|SENP7_MOUSE	Senp7	Sentrin-specific protease 7 OS=Mus musculus OX=10090 GN=Senp7 PE=1 SV=1	197	1	C	UR	40.0093	45.999	41.1469	31.7775	23.7487	29.8289	24.4284	26.2475	17.4597	18.8592	23.9007
tr|G3X956|G3X956_MOUSE	Supt16	SPT16, facilitates chromatin-remodeling subunit OS=Mus musculus OX=10090 GN=Supt16 PE=1 SV=1	198	14	C	UR	1983.24	2265.84	3579.5	2103.24	2876.66	2112.05	5398.15	2951.08	2646.02	2256.54	2811.2
sp|P27773|PDIA3_MOUSE	Pdia3	Protein disulfide-isomerase A3 OS=Mus musculus OX=10090 GN=Pdia3 PE=1 SV=2	199	21	C	UR	5220.18	9253.36	3471.15	7195.22	6983.25	3538.7	5968.01	5421.27	4414.55	3757.88	4723.59
sp|P08003|PDIA4_MOUSE	Pdia4	Protein disulfide-isomerase A4 OS=Mus musculus OX=10090 GN=Pdia4 PE=1 SV=3	199	17	C	UR	2553.18	2816.71	2327.87	2467.85	3356.79	2072.39	3213.78	2785.75	2814.72	2163.71	2905.61
sp|Q3U5C8|ARHGG_MOUSE	Arhgef16	Rho guanine nucleotide exchange factor 16 OS=Mus musculus OX=10090 GN=Arhgef16 PE=1 SV=3	201	9	C	UR	1264.02	854.91	760.634	1036.59	1459.97	1081.6	588.879	1995.76	1372.22	1651.29	2051.37
sp|Q9Z2G6|SE1L1_MOUSE	Sel1l	Protein sel-1 homolog 1 OS=Mus musculus OX=10090 GN=Sel1l PE=1 SV=2	202	2	C	UR	112.679	90.3485	107.97	122.906	54.3582	136.216	100.5	69.0683	111.199	80.2035	84.1338
sp|Q00493|CBPE_MOUSE	Cpe	Carboxypeptidase E OS=Mus musculus OX=10090 GN=Cpe PE=1 SV=2	203	7	C	UR	687.37	836.9	701.638	676.787	775.368	731.309	426.646	589.072	511.889	572.884	894.153
sp|Q921H9|COA7_MOUSE	Coa7	Cytochrome c oxidase assembly factor 7 OS=Mus musculus OX=10090 GN=Coa7 PE=1 SV=1	204	5	C	UR	1508.18	1382.94	839.893	1445.14	1333.2	1066.77	679.17	1430.82	1061.16	1239.41	1190.03
sp|Q91YP2|NEUL_MOUSE	Nln	Neurolysin, mitochondrial OS=Mus musculus OX=10090 GN=Nln PE=1 SV=1	205	15	C	UR	2487.31	3020.66	5206.86	2375.69	3476.24	1563.72	7811.27	2301.44	1640.32	1863.15	2444.54
tr|A0A0R4IZY0|A0A0R4IZY0_MOUSE	Thop1	Thimet oligopeptidase OS=Mus musculus OX=10090 GN=Thop1 PE=1 SV=1	205	18	C	UR	1361.49	1713.27	2668.01	1174.75	1916.38	979.147	4856.97	1409.67	1141.02	1027.59	1463.89
sp|P70202|LXN_MOUSE	Lxn	Latexin OS=Mus musculus OX=10090 GN=Lxn PE=1 SV=2	206	5	C	UR	157.973	183.075	215.453	116.971	196.699	111.707	512.063	146.608	121.283	106.248	160.944
sp|P97927|LAMA4_MOUSE	Lama4	Laminin subunit alpha-4 OS=Mus musculus OX=10090 GN=Lama4 PE=1 SV=2	207	11	C	UR	752.746	1108.68	516.821	850.521	964.391	2592.49	737.039	750.621	1378.7	1433.23	639.842
sp|Q922R8|PDIA6_MOUSE	Pdia6	Protein disulfide-isomerase A6 OS=Mus musculus OX=10090 GN=Pdia6 PE=1 SV=3	208	13	C	UR	2181.93	2044.72	1039.94	2041.2	2972.94	1869.02	576.988	2727.05	2401.35	2279.83	2799.9
tr|Q3TML0|Q3TML0_MOUSE	Pdia6	Protein disulfide-isomerase A6 OS=Mus musculus OX=10090 GN=Pdia6 PE=1 SV=1	208	1	C	UR	14.5021	26.8283	1.93939	29.4879	42.0901	9.52913	0	14.9543	21.5136	21.3783	25.1985
sp|Q8JZM7|CDC73_MOUSE	Cdc73	Parafibromin OS=Mus musculus OX=10090 GN=Cdc73 PE=1 SV=1	209	3	C	UR	416.924	402.219	257.299	390.525	403.421	410.508	356.816	455.495	429.856	374.314	364.063
sp|Q8CGY8|OGT1_MOUSE	Ogt	UDP-N-acetylglucosamine--peptide N-acetylglucosaminyltransferase 110 kDa subunit OS=Mus musculus OX=10090 GN=Ogt PE=1 SV=2	210	9	C	UR	1348.36	967.336	588.114	1448.69	1149.21	1571.01	450.3	1562.66	1553.53	1544.3	1165.87
sp|Q9QYI3|DNJC7_MOUSE	Dnajc7	DnaJ homolog subfamily C member 7 OS=Mus musculus OX=10090 GN=Dnajc7 PE=1 SV=2	211	9	C	UR	992.621	820.916	347.342	912.621	1230.32	932.134	443.299	1550.42	1574.68	1545.08	1631.91
sp|Q9D6T0|NOSIP_MOUSE	Nosip	Nitric oxide synthase-interacting protein OS=Mus musculus OX=10090 GN=Nosip PE=1 SV=1	212	2	C	UR	108.915	81.5991	69.537	154.229	93.0803	111.863	48.5035	336.934	281.75	458.416	254.025
sp|Q9DCC4|P5CR3_MOUSE	Pycr3	Pyrroline-5-carboxylate reductase 3 OS=Mus musculus OX=10090 GN=Pycr3 PE=1 SV=2	213	3	C	UR	326.551	100.484	279.46	203.357	532.579	273.32	950.845	276.505	128.76	159.788	181.012
sp|Q61033|LAP2A_MOUSE	Tmpo	Lamina-associated polypeptide 2, isoforms alpha/zeta OS=Mus musculus OX=10090 GN=Tmpo PE=1 SV=4	214	2	C	UR	84.5679	40.0533	14.6339	81.3848	138.672	105.43	14.5288	190.506	163.605	201.247	227.481
sp|Q61029|LAP2B_MOUSE	Tmpo	Lamina-associated polypeptide 2, isoforms beta/delta/epsilon/gamma OS=Mus musculus OX=10090 GN=Tmpo PE=1 SV=4	214	2	C	UR	2487.54	512.286	1387.6	331.503	181.932	15.3657	16.2018	31.5929	33.3463	40.869	29.9727
sp|Q68FH4|GALK2_MOUSE	Galk2	N-acetylgalactosamine kinase OS=Mus musculus OX=10090 GN=Galk2 PE=1 SV=1	215	6	C	UR	502.532	382.652	404.107	499.293	325.79	636.848	350.572	398.702	521.708	463.99	366.099
sp|Q8BR63|F177A_MOUSE	Fam177a1	Protein FAM177A1 OS=Mus musculus OX=10090 GN=Fam177a1 PE=1 SV=1	216	7	C	UR	805.804	505.789	1041.88	870.406	439.682	855.793	672.199	645.486	749.646	650.952	754.271
sp|Q8K3X6|ANS4B_MOUSE	Anks4b	Ankyrin repeat and SAM domain-containing protein 4B OS=Mus musculus OX=10090 GN=Anks4b PE=1 SV=1	217	2	C	UR	160.362	120.62	133.199	175.511	184.62	169.738	107.918	212.93	174.669	211.005	194.514
sp|Q9Z204|HNRPC_MOUSE	Hnrnpc	Heterogeneous nuclear ribonucleoproteins C1/C2 OS=Mus musculus OX=10090 GN=Hnrnpc PE=1 SV=1	218	8	C	UR	951.792	1477.27	1445.82	1055.4	827.386	1013.74	1791.82	1520.31	1493.51	1969.48	1419.9
sp|O88307|SORL_MOUSE	Sorl1	Sortilin-related receptor OS=Mus musculus OX=10090 GN=Sorl1 PE=1 SV=3	219	17	C	UR	1304.5	1448.75	3125.82	1723.17	1570.23	768.284	3152.03	855.695	875.492	783.944	1422.2
sp|Q9WV70|NOC2L_MOUSE	Noc2l	Nucleolar complex protein 2 homolog OS=Mus musculus OX=10090 GN=Noc2l PE=1 SV=2	220	1	C	UR	28.7413	31.3094	198.65	44.4897	12.3875	27.8504	149.127	25.0332	42.9655	19.5012	20.7291
sp|P51660|DHB4_MOUSE	Hsd17b4	Peroxisomal multifunctional enzyme type 2 OS=Mus musculus OX=10090 GN=Hsd17b4 PE=1 SV=3	221	14	C	UR	3199.01	2100.78	2077.85	2900.38	2175.56	1740.04	1121.61	1824.09	1871.02	1599.74	2180.28
sp|Q9D0G0|RT30_MOUSE	Mrps30	28S ribosomal protein S30, mitochondrial OS=Mus musculus OX=10090 GN=Mrps30 PE=1 SV=1	222	5	C	UR	484.603	764.634	139.465	782.901	642.397	305.423	154.12	650.276	616.475	548.697	884.877
sp|E9PYK3|PARP4_MOUSE	Parp4	Protein mono-ADP-ribosyltransferase PARP4 OS=Mus musculus OX=10090 GN=Parp4 PE=1 SV=1	223	16	C	UR	2436.67	1996.24	588.901	1910.59	2437.49	1674.37	671.371	2190.98	1719.28	1679.82	2203.38
sp|Q99LC5|ETFA_MOUSE	Etfa	Electron transfer flavoprotein subunit alpha, mitochondrial OS=Mus musculus OX=10090 GN=Etfa PE=1 SV=2	224	10	C	UR	1081.87	1213.34	453.581	1442.29	1027.86	1368.21	279.761	886.973	773.399	1116.2	814.139
sp|Q9WV68|DECR2_MOUSE	Decr2	Peroxisomal 2,4-dienoyl-CoA reductase OS=Mus musculus OX=10090 GN=Decr2 PE=1 SV=1	225	7	C	UR	1636.08	1163.08	2521.67	1595.51	667.84	1121.57	4956.03	837.995	891.368	886.182	980.477
sp|P63038|CH60_MOUSE	Hspd1	60 kDa heat shock protein, mitochondrial OS=Mus musculus OX=10090 GN=Hspd1 PE=1 SV=1	226	19	C	UR	2562.56	5628.79	1830.73	3702.82	3122.74	2345.87	1108.78	3171.04	3361.43	3562.62	3621.07
sp|P70168|IMB1_MOUSE	Kpnb1	Importin subunit beta-1 OS=Mus musculus OX=10090 GN=Kpnb1 PE=1 SV=2	227	9	C	UR	1072.16	1602.33	151.306	1457.29	1385.58	1149.51	334.107	1549.57	1444.05	1342.62	1340.58
sp|Q3TXS7|PSMD1_MOUSE	Psmd1	26S proteasome non-ATPase regulatory subunit 1 OS=Mus musculus OX=10090 GN=Psmd1 PE=1 SV=1	228	13	C	UR	1913.03	1678.12	426.443	2032.88	2598.69	1764.51	480.928	2531.24	2198.56	2376.07	2639.36
sp|Q61545|EWS_MOUSE	Ewsr1	RNA-binding protein EWS OS=Mus musculus OX=10090 GN=Ewsr1 PE=1 SV=2	229	4	C	UR	902.352	740.366	48.8737	417.041	996.43	482.877	40.2796	816.225	724.884	666.515	805.02
sp|P01027|CO3_MOUSE	C3	Complement C3 OS=Mus musculus OX=10090 GN=C3 PE=1 SV=3	230	23	C	UR	2663.16	3723.37	6659.67	3399.82	2622.86	2033.65	5697.54	2457.12	3635.26	4332.47	2987.79
sp|Q7TN12|INAVA_MOUSE	Inava	Innate immunity activator protein OS=Mus musculus OX=10090 GN=Inava PE=2 SV=1	231	1	C	UR	28.0814	20.9161	15.3779	34.2676	25.4456	19.2808	10.156	37.5908	43.6135	33.1865	40.6096
sp|Q64727|VINC_MOUSE	Vcl	Vinculin OS=Mus musculus OX=10090 GN=Vcl PE=1 SV=4	232	23	C	UR	2972.37	3441.77	2636.62	2998.91	3227.38	4842.66	5344.21	2581.99	3390.06	3280.15	2654.74
sp|Q8BL66|EEA1_MOUSE	Eea1	Early endosome antigen 1 OS=Mus musculus OX=10090 GN=Eea1 PE=1 SV=2	233	28	C	UR	5899.53	6643.19	1390.74	5581.1	4349.44	4616.49	955.068	4307.52	4941.87	4528.08	3983.61
sp|Q5SV80|MYO19_MOUSE	Myo19	Unconventional myosin-XIX OS=Mus musculus OX=10090 GN=Myo19 PE=1 SV=1	234	5	C	UR	306.98	148.563	146.4	216.815	119.509	209.545	135.895	157.294	178.234	189.667	157.471
sp|Q03173|ENAH_MOUSE	Enah	Protein enabled homolog OS=Mus musculus OX=10090 GN=Enah PE=1 SV=2	235	1	C	UR	8.44503	5.63585	7.02521	13.8954	5.22548	35.4888	47.7143	12.5078	14.6496	21.4576	7.94213
sp|Q3ULA2|FBW1A_MOUSE	Btrc	F-box/WD repeat-containing protein 1A OS=Mus musculus OX=10090 GN=Btrc PE=1 SV=2	236	2	C	UR	138.388	178.244	256.126	180.705	136.8	128.663	302.843	130.334	150.436	134.918	138.324
sp|P17183|ENOG_MOUSE	Eno2	Gamma-enolase OS=Mus musculus OX=10090 GN=Eno2 PE=1 SV=2	237	5	C	UR	425.937	442.446	343.844	316.861	919.586	326.726	441.007	604.17	386.313	346.802	513.141
sp|P21550|ENOB_MOUSE	Eno3	Beta-enolase OS=Mus musculus OX=10090 GN=Eno3 PE=1 SV=3	237	15	C	UR	2256.25	5055.4	4307.95	2392.84	6651	1272.77	3165.6	1764.85	1199.68	1318.37	2115.84
sp|P17182|ENOA_MOUSE	Eno1	Alpha-enolase OS=Mus musculus OX=10090 GN=Eno1 PE=1 SV=3	237	15	C	UR	1563.9	3879.09	1192.23	1836.27	2188.87	1127.24	3316.39	3005.1	1662.52	1704.89	1586.44
sp|P09405|NUCL_MOUSE	Ncl	Nucleolin OS=Mus musculus OX=10090 GN=Ncl PE=1 SV=2	238	12	C	UR	1678.3	1742.32	598.134	1826.13	2981.63	1655.14	269.334	4435.12	3592.7	3540.84	4564.21
sp|Q9EP71|RAI14_MOUSE	Rai14	Ankycorbin OS=Mus musculus OX=10090 GN=Rai14 PE=1 SV=1	239	5	C	UR	615.779	303.127	228.027	344.207	450.987	398.945	178.472	595.371	563.189	666.122	489.788
tr|O88325|O88325_MOUSE	Naglu	Alpha-N-acetylglucosaminidase OS=Mus musculus OX=10090 GN=Naglu PE=1 SV=1	240	11	C	UR	1064.47	1308.81	3962.54	1069.77	1368.23	849.395	4345.35	950.676	796.773	923.636	911.389
tr|A8DUK4|A8DUK4_MOUSE	Hbb-bs	Beta-globin OS=Mus musculus OX=10090 GN=Hbb-bs PE=1 SV=1	241	6	C	UR	703.381	978.071	479.707	847.769	994.87	907.534	842.271	848.419	1742.08	1329.88	1235.31
sp|P02088|HBB1_MOUSE	Hbb-b1	Hemoglobin subunit beta-1 OS=Mus musculus OX=10090 GN=Hbb-b1 PE=1 SV=2	241	12	C	UR	648.029	1083.73	1257.69	736.818	1050.26	1006.81	1350.98	883.564	1523.05	1311.69	1250.41
sp|P02104|HBE_MOUSE	Hbb-y	Hemoglobin subunit epsilon-Y2 OS=Mus musculus OX=10090 GN=Hbb-y PE=1 SV=2	241	4	C	UR	444.196	1197.18	789.415	503.458	702.871	575.235	1272.35	584.106	1053.62	1052.14	975.915
sp|P52624|UPP1_MOUSE	Upp1	Uridine phosphorylase 1 OS=Mus musculus OX=10090 GN=Upp1 PE=1 SV=2	242	7	C	UR	809.438	578.381	606.496	375.568	776.797	760.19	2122.42	931.8	805.25	706.156	972.585
sp|P47791|GSHR_MOUSE	Gsr	Glutathione reductase, mitochondrial OS=Mus musculus OX=10090 GN=Gsr PE=1 SV=3	243	18	C	UR	1582.41	1999.36	3098.95	1469.69	2177.3	1022.87	3946.22	1647.18	1320.39	1315.26	1465.93
sp|P45952|ACADM_MOUSE	Acadm	Medium-chain specific acyl-CoA dehydrogenase, mitochondrial OS=Mus musculus OX=10090 GN=Acadm PE=1 SV=1	244	12	C	UR	2410.43	1375.81	2572.79	2024.03	2732.15	2067.69	5119.26	1566.52	1144.51	1449.9	1464.55
sp|P01942|HBA_MOUSE	Hba	Hemoglobin subunit alpha OS=Mus musculus OX=10090 GN=Hba PE=1 SV=2	245	5	C	UR	332.096	2016.35	583.833	485.472	670.683	347.911	1145.31	573.764	841.826	1098.9	721.508
sp|Q9EPL9|ACOX3_MOUSE	Acox3	Peroxisomal acyl-coenzyme A oxidase 3 OS=Mus musculus OX=10090 GN=Acox3 PE=1 SV=2	246	8	C	UR	384.213	401.685	652.145	505.277	221.525	493.206	636.359	436.874	414.406	473.961	580.374
sp|Q62172|RBP1_MOUSE	Ralbp1	RalA-binding protein 1 OS=Mus musculus OX=10090 GN=Ralbp1 PE=1 SV=4	247	2	C	UR	62.7092	93.0374	58.0521	70.0968	55.7891	77.8689	29.0751	80.9491	83.8478	86.8433	73.7636
sp|P48678|LMNA_MOUSE	Lmna	Prelamin-A/C OS=Mus musculus OX=10090 GN=Lmna PE=1 SV=2	248	16	C	UR	2894.74	2245.43	316.868	2378.35	4509.71	2336.66	414.153	4763.44	3478.46	4741.2	5502.3
sp|P51881|ADT2_MOUSE	Slc25a5	ADP/ATP translocase 2 OS=Mus musculus OX=10090 GN=Slc25a5 PE=1 SV=3	249	6	C	UR	852.88	469.239	2326.13	772.049	170.916	379.81	1807.21	283.824	390.008	346.064	223.089
sp|P48962|ADT1_MOUSE	Slc25a4	ADP/ATP translocase 1 OS=Mus musculus OX=10090 GN=Slc25a4 PE=1 SV=4	249	8	C	UR	1440.14	1228.25	4178.5	1249.59	322.089	1717.84	2688.66	693.547	892.548	1032.51	595.045
sp|Q91YT0|NDUV1_MOUSE	Ndufv1	NADH dehydrogenase [ubiquinone] flavoprotein 1, mitochondrial OS=Mus musculus OX=10090 GN=Ndufv1 PE=1 SV=1	250	9	C	UR	869.526	807.427	640.939	891.81	1000.83	567.365	476.796	675.522	551.429	467.676	914.143
sp|P10107|ANXA1_MOUSE	Anxa1	Annexin A1 OS=Mus musculus OX=10090 GN=Anxa1 PE=1 SV=2	251	11	C	UR	1247.93	1632.9	3954.51	1714.02	935.139	843.305	1121.61	1328.31	1769.98	1555.79	2441.07
sp|A2BH40|ARI1A_MOUSE	Arid1a	AT-rich interactive domain-containing protein 1A OS=Mus musculus OX=10090 GN=Arid1a PE=1 SV=1	251	8	C	UR	1776.01	1698.86	1214.25	1700.58	1671.67	1436.99	764.568	1983.29	2143.65	1918.94	2225.54
sp|Q9CQI6|COTL1_MOUSE	Cotl1	Coactosin-like protein OS=Mus musculus OX=10090 GN=Cotl1 PE=1 SV=3	252	4	C	UR	461.184	506.921	70.8618	391.889	647.071	513.268	71.8501	528.175	573.171	571.172	538.532
sp|Q9D0I9|SYRC_MOUSE	Rars1	Arginine--tRNA ligase, cytoplasmic OS=Mus musculus OX=10090 GN=Rars1 PE=1 SV=2	253	16	C	UR	2595.07	2957.36	1262.39	2265.2	2383.53	2606.51	741.251	2453.43	2871.82	2310.25	2011.61
sp|Q9JKA5|GPA33_MOUSE	Gpa33	Cell surface A33 antigen OS=Mus musculus OX=10090 GN=Gpa33 PE=2 SV=2	254	6	C	UR	676.41	976.784	1204.12	967.438	787.725	579.431	1423.02	790.4	913.366	825.471	1192.5
sp|Q8R5H1|UBP15_MOUSE	Usp15	Ubiquitin carboxyl-terminal hydrolase 15 OS=Mus musculus OX=10090 GN=Usp15 PE=1 SV=1	255	11	C	UR	2065.29	1908.47	730.278	2088.15	1861.3	1716.65	538.4	1995.22	2122.6	2007.34	1969.49
sp|P35123|UBP4_MOUSE	Usp4	Ubiquitin carboxyl-terminal hydrolase 4 OS=Mus musculus OX=10090 GN=Usp4 PE=1 SV=3	255	7	C	UR	1470.56	1232.54	1614.66	1590.01	805.27	1529.01	1422.94	1115.18	1463.38	1227.61	1113.12
sp|O88685|PRS6A_MOUSE	Psmc3	26S proteasome regulatory subunit 6A OS=Mus musculus OX=10090 GN=Psmc3 PE=1 SV=2	256	8	C	UR	2465.61	2152.12	1044.6	2170.78	1949.35	1825.49	1737.53	2048.35	1846.28	2032.8	1942.12
sp|Q91ZX7|LRP1_MOUSE	Lrp1	Prolow-density lipoprotein receptor-related protein 1 OS=Mus musculus OX=10090 GN=Lrp1 PE=1 SV=1	257	24	C	UR	2348.62	2434.91	3444.67	2228.85	2002.89	2131.97	3349.46	1780.62	1927.93	2338.68	1895.79
sp|O88572|LRP6_MOUSE	Lrp6	Low-density lipoprotein receptor-related protein 6 OS=Mus musculus OX=10090 GN=Lrp6 PE=1 SV=1	257	7	C	UR	576.766	675.519	1173.22	627.392	690.557	551.901	1181.41	585.866	536.228	539.191	579.116
sp|Q9ES00|UBE4B_MOUSE	Ube4b	Ubiquitin conjugation factor E4 B OS=Mus musculus OX=10090 GN=Ube4b PE=1 SV=3	258	3	C	UR	131.998	107.559	150.77	144.028	93.6681	199.328	134.792	128.941	170.884	152.275	112.286
sp|P62874|GBB1_MOUSE	Gnb1	Guanine nucleotide-binding protein G(I)/G(S)/G(T) subunit beta-1 OS=Mus musculus OX=10090 GN=Gnb1 PE=1 SV=3	259	3	C	UR	147.624	207.732	97.1441	157.963	178.866	102.517	142.954	118.624	116.345	90.8517	162.433
sp|P62880|GBB2_MOUSE	Gnb2	Guanine nucleotide-binding protein G(I)/G(S)/G(T) subunit beta-2 OS=Mus musculus OX=10090 GN=Gnb2 PE=1 SV=3	259	4	C	UR	670.962	587.449	758.911	682.382	725.824	571.812	744.39	592.713	566.821	490.588	730.209
sp|Q9R0M5|TPK1_MOUSE	Tpk1	Thiamin pyrophosphokinase 1 OS=Mus musculus OX=10090 GN=Tpk1 PE=1 SV=1	260	5	C	UR	965.063	992.326	2051.11	635.666	1255.87	583.907	1424.67	720.264	590.667	601.506	757.892
sp|Q8K2V1|PP4R1_MOUSE	Ppp4r1	Serine/threonine-protein phosphatase 4 regulatory subunit 1 OS=Mus musculus OX=10090 GN=Ppp4r1 PE=1 SV=2	261	5	C	UR	272.072	258.008	107.777	328.341	242.68	316.65	86.8915	304.35	349.709	317.243	328.463
sp|Q921W4|QORL1_MOUSE	Cryzl1	Quinone oxidoreductase-like protein 1 OS=Mus musculus OX=10090 GN=Cryzl1 PE=1 SV=1	262	3	C	UR	1477.5	1318.33	206.645	1205.22	1554.94	1139.32	312.315	1162.3	1019.36	1199.64	1226.96
sp|Q8K2B3|SDHA_MOUSE	Sdha	Succinate dehydrogenase [ubiquinone] flavoprotein subunit, mitochondrial OS=Mus musculus OX=10090 GN=Sdha PE=1 SV=1	263	11	C	UR	1229.87	1572.98	1129.44	1293.79	1406.17	790.759	2613.48	1185.33	655.139	888.615	998.857
sp|Q8K296|MTMR3_MOUSE	Mtmr3	Myotubularin-related protein 3 OS=Mus musculus OX=10090 GN=Mtmr3 PE=1 SV=2	264	1	C	UR	24.9086	29.6302	21.7848	32.6197	23.3062	35.3623	18.6836	29.3313	39.564	27.4891	19.6016
sp|Q8C4Y3-3|NELFB_MOUSE	Nelfb	Isoform 2 of Negative elongation factor B OS=Mus musculus OX=10090 GN=Nelfb	265	3	C	UR	203.226	143.014	109.713	191.107	232.933	273.191	107.756	246.395	223.085	200.148	220.102
sp|A6H584|CO6A5_MOUSE	Col6a5	Collagen alpha-5(VI) chain OS=Mus musculus OX=10090 GN=Col6a5 PE=1 SV=4	266	5	C	UR	50.8248	96.7252	163.079	82.8694	95.1392	2479.24	302.397	184.962	585.3	576.68	80.0452
sp|Q9CYA0|CREL2_MOUSE	Creld2	Protein disulfide isomerase Creld2 OS=Mus musculus OX=10090 GN=Creld2 PE=1 SV=1	267	10	C	UR	1007.33	959.679	4869.91	835.108	981.147	650.511	4745.68	986.524	810.306	921.199	1101.32
sp|A2A863|ITB4_MOUSE	Itgb4	Integrin beta-4 OS=Mus musculus OX=10090 GN=Itgb4 PE=1 SV=1	268	25	C	UR	2547.41	2888.94	5550.3	3383.06	1959.06	2029.69	5947.59	2070.81	2217.37	1688.02	2731.9
sp|Q6Y7W8|GGYF2_MOUSE	Gigyf2	GRB10-interacting GYF protein 2 OS=Mus musculus OX=10090 GN=Gigyf2 PE=1 SV=2	269	3	C	UR	180.191	96.7931	73.4863	163.452	111.841	150.112	27.2336	165.864	213.085	142.493	166.358
sp|Q8BRK8|AAPK2_MOUSE	Prkaa2	5'-AMP-activated protein kinase catalytic subunit alpha-2 OS=Mus musculus OX=10090 GN=Prkaa2 PE=1 SV=3	270	6	C	UR	642.683	481.378	1663.28	645.917	267.645	586.488	1820.27	364.611	449.244	428.871	414.807
sp|Q5EG47|AAPK1_MOUSE	Prkaa1	5'-AMP-activated protein kinase catalytic subunit alpha-1 OS=Mus musculus OX=10090 GN=Prkaa1 PE=1 SV=2	270	8	C	UR	1050.88	791.689	963.633	1154.18	651.948	1041.64	698.073	863.765	952.542	938.468	799.289
sp|P29594|CASP2_MOUSE	Casp2	Caspase-2 OS=Mus musculus OX=10090 GN=Casp2 PE=1 SV=5	271	1	C	UR	306.294	285.865	252.729	213.174	259.282	249.905	325.247	298.727	250.793	272.121	282.329
sp|Q01237|HMDH_MOUSE	Hmgcr	3-hydroxy-3-methylglutaryl-coenzyme A reductase OS=Mus musculus OX=10090 GN=Hmgcr PE=1 SV=3	272	2	C	UR	264.477	281.082	208.954	489.624	111.328	186.492	81.2025	144.49	331.815	188.176	161.911
sp|E9Q7P9|CDHR2_MOUSE	Cdhr2	Cadherin-related family member 2 OS=Mus musculus OX=10090 GN=Cdhr2 PE=1 SV=1	273	6	C	UR	968.25	848.905	1469.35	773.466	731.048	395.983	1680.6	553.489	484.512	478.591	729.135
sp|Q8CC86|PNCB_MOUSE	Naprt	Nicotinate phosphoribosyltransferase OS=Mus musculus OX=10090 GN=Naprt PE=1 SV=1	274	9	C	UR	1683.98	1099.84	435.473	918.066	1927.08	1278.34	379.831	1313.12	953.193	1027.93	1242.61
sp|P63239|NEC1_MOUSE	Pcsk1	Neuroendocrine convertase 1 OS=Mus musculus OX=10090 GN=Pcsk1 PE=1 SV=1	275	3	C	UR	170.565	182.714	183.32	151.785	155.648	236.922	135.468	138.635	154.024	149.018	152.062
sp|Q61526|ERBB3_MOUSE	Erbb3	Receptor tyrosine-protein kinase erbB-3 OS=Mus musculus OX=10090 GN=Erbb3 PE=1 SV=2	276	9	C	UR	736.037	626.702	1586.02	550.012	551.062	573.09	2204.67	649.528	463.653	457.735	640.638
sp|Q61830|MRC1_MOUSE	Mrc1	Macrophage mannose receptor 1 OS=Mus musculus OX=10090 GN=Mrc1 PE=1 SV=2	277	14	C	UR	778.882	865.307	3024.94	827.682	507.902	1646.57	2229.4	557.914	1055.65	1291.13	436.389
sp|Q8VHQ9|ACO11_MOUSE	Acot11	Acyl-coenzyme A thioesterase 11 OS=Mus musculus OX=10090 GN=Acot11 PE=1 SV=1	278	11	C	UR	2186.52	1775.98	618.084	1934.39	2202.51	2231.79	582.72	2091.92	1834.78	1821.88	2107.07
sp|Q99M15|PPIP2_MOUSE	Pstpip2	Proline-serine-threonine phosphatase-interacting protein 2 OS=Mus musculus OX=10090 GN=Pstpip2 PE=1 SV=4	279	3	C	UR	190.603	74.8395	90.0712	168.499	124.223	211.888	76.4962	144.937	185.034	160.983	134.466
sp|A6H5X4|PHF11_MOUSE	Phf11	PHD finger protein 11 OS=Mus musculus OX=10090 GN=Phf11 PE=2 SV=1	280	1	C	UR	177.583	57.2821	157.083	66.1417	115.72	143.207	145.455	124.574	130.568	120.252	107.945
sp|Q91YP0|L2HDH_MOUSE	L2hgdh	L-2-hydroxyglutarate dehydrogenase, mitochondrial OS=Mus musculus OX=10090 GN=L2hgdh PE=1 SV=1	281	5	C	UR	450.429	606.316	775.441	548.615	479.463	452.922	1123.47	432.158	336.392	395.266	393.736
sp|Q8BFY9|TNPO1_MOUSE	Tnpo1	Transportin-1 OS=Mus musculus OX=10090 GN=Tnpo1 PE=1 SV=2	282	1	C	UR	129.187	57.2321	24.9189	113.63	82.7428	215.083	27.4717	109.407	166.942	141.798	93.5862
sp|Q5H8C4|VP13A_MOUSE	Vps13a	Vacuolar protein sorting-associated protein 13A OS=Mus musculus OX=10090 GN=Vps13a PE=1 SV=1	283	9	C	UR	1387.9	1616.46	2309.22	1489.86	884.639	1405.86	2261.97	910.603	1054.27	1013.14	1053.7
sp|Q80YX1-2|TENA_MOUSE	Tnc	Isoform 2 of Tenascin OS=Mus musculus OX=10090 GN=Tnc	284	20	C	UR	1797.41	1601.5	2925.98	1305.63	848.018	3924.37	5991.36	826.916	4119.96	4870.45	599.841
sp|Q99KC8|VMA5A_MOUSE	Vwa5a	von Willebrand factor A domain-containing protein 5A OS=Mus musculus OX=10090 GN=Vwa5a PE=1 SV=2	285	17	C	UR	2579.17	2430.73	438.56	1679.84	2499.17	1703.7	760.6	1922.24	1983.76	1906.09	1988.59
sp|Q91ZT5|FGD4_MOUSE	Fgd4	FYVE, RhoGEF and PH domain-containing protein 4 OS=Mus musculus OX=10090 GN=Fgd4 PE=1 SV=1	286	4	C	UR	1085.83	1078.33	654.82	935.426	1031.24	860.579	676.253	839.989	797.396	878.41	1064.06
sp|P56380|AP4A_MOUSE	Nudt2	Bis(5'-nucleosyl)-tetraphosphatase [asymmetrical] OS=Mus musculus OX=10090 GN=Nudt2 PE=1 SV=3	287	2	C	UR	27.6298	36.1972	8.48613	19.7263	50.1754	17.0115	9.06695	36.4449	27.3767	35.155	27.6721
sp|Q8BU85|MSRB3_MOUSE	Msrb3	Methionine-R-sulfoxide reductase B3, mitochondrial OS=Mus musculus OX=10090 GN=Msrb3 PE=1 SV=2	288	3	C	UR	78.9449	48.1614	77.5173	59.6298	76.4894	185.403	46.3752	134.157	156.824	269.115	97.8449
sp|Q01279|EGFR_MOUSE	Egfr	Epidermal growth factor receptor OS=Mus musculus OX=10090 GN=Egfr PE=1 SV=1	289	6	C	UR	276.989	320.281	626.45	292.185	201.424	276.56	844.492	236.204	293.349	262.494	331.135
sp|E9Q557|DESP_MOUSE	Dsp	Desmoplakin OS=Mus musculus OX=10090 GN=Dsp PE=1 SV=1	290	17	C	UR	4376.89	3039.68	427.986	4394.18	1575.28	2311.62	977.661	2288.54	3296.13	2378.42	2802.56
sp|P15924|DESP_HUMAN_contaminant	DSP	Desmoplakin OS=Homo sapiens GN=DSP PE=1 SV=3	290	23	C	UR	5892.2	5064.56	554.051	7018.52	2537.86	3925.73	854.261	4603.77	5726.49	4614.74	4851.44
sp|Q3V384|AFG1L_MOUSE	Afg1l	AFG1-like ATPase OS=Mus musculus OX=10090 GN=Afg1l PE=1 SV=1	291	1	C	UR	51.8342	67.5137	69.184	57.0733	36.0194	49.1166	36.3355	41.1069	40.2732	53.2696	28.7549
sp|Q8BWG8-2|ARRB1_MOUSE	Arrb1	Isoform 1B of Beta-arrestin-1 OS=Mus musculus OX=10090 GN=Arrb1	292	5	C	UR	700.873	722.767	130.799	793.825	688.206	1122.28	119.728	661.894	607.746	651.091	609.153
sp|Q99104|MYO5A_MOUSE	Myo5a	Unconventional myosin-Va OS=Mus musculus OX=10090 GN=Myo5a PE=1 SV=2	293	8	C	UR	1066.79	749.626	511.228	1031.23	729.774	901.518	491.356	880.874	1023.66	849.861	1054.17
sp|P21271-3|MYO5B_MOUSE	Myo5b	Isoform 3 of Unconventional myosin-Vb OS=Mus musculus OX=10090 GN=Myo5b	293	12	C	UR	1322.21	830.623	356.129	1131.42	1276.32	1043.6	300.049	1066.93	870.625	831.176	1339.96
tr|E9Q1F5|E9Q1F5_MOUSE	Myo5c	Myosin VC OS=Mus musculus OX=10090 GN=Myo5c PE=1 SV=1	293	10	C	UR	814.203	839.399	537.418	831.55	765.222	785.855	511.703	733.932	833.121	616.126	1113.2
sp|Q9D0T1|NH2L1_MOUSE	Snu13	NHP2-like protein 1 OS=Mus musculus OX=10090 GN=Snu13 PE=1 SV=4	294	4	C	UR	265.244	267.469	158.682	249.415	440.452	330.518	132.412	331.017	306.625	306.803	387.644
sp|P38649|BGAT_MOUSE	Abo	Histo-blood group ABO system transferase OS=Mus musculus OX=10090 GN=Abo PE=1 SV=2	295	2	C	UR	65.1936	72.3877	197.191	79.3144	59.6001	86.8759	176.817	56.8792	55.2225	50.2079	46.8599
sp|Q8CG76|ARK72_MOUSE	Akr7a2	Aflatoxin B1 aldehyde reductase member 2 OS=Mus musculus OX=10090 GN=Akr7a2 PE=1 SV=3	296	6	C	UR	439.351	259.714	186.467	331.538	311.631	361.797	119.726	362.885	279.013	332.754	262.114
sp|Q2TPA8|HSDL2_MOUSE	Hsdl2	Hydroxysteroid dehydrogenase-like protein 2 OS=Mus musculus OX=10090 GN=Hsdl2 PE=1 SV=1	297	5	C	UR	1193.61	862.348	729.067	1014.54	531.155	1080.05	398.744	640.553	651.749	690.559	623.751
sp|Q7TPR4|ACTN1_MOUSE	Actn1	Alpha-actinin-1 OS=Mus musculus OX=10090 GN=Actn1 PE=1 SV=1	298	20	C	UR	1380.86	1540.06	1369.98	1350.32	1733.61	1852.49	1592.86	1409	1401.1	1416.96	1520.54
sp|P57780|ACTN4_MOUSE	Actn4	Alpha-actinin-4 OS=Mus musculus OX=10090 GN=Actn4 PE=1 SV=1	298	25	C	UR	4677.59	5701.05	987.294	4483.6	5847.61	3821.57	1476.98	4920.21	3833.46	3796.82	6078.6
tr|A1BN54|A1BN54_MOUSE	Actn1	Alpha actinin 1a OS=Mus musculus OX=10090 GN=Actn1 PE=1 SV=1	298	1	C	UR	117.76	62.9685	23.8868	157.978	138.696	978.08	42.8655	156.889	204.841	447.099	66.5718
sp|Q8BNW9|KBTBB_MOUSE	Kbtbd11	Kelch repeat and BTB domain-containing protein 11 OS=Mus musculus OX=10090 GN=Kbtbd11 PE=1 SV=3	299	4	C	UR	264.387	199.678	91.0942	212.873	141.594	286.787	72.7654	137.68	158.178	170.143	136.744
sp|P45377|ALD2_MOUSE	Akr1b8	Aldose reductase-related protein 2 OS=Mus musculus OX=10090 GN=Akr1b8 PE=1 SV=2	300	11	C	UR	1491.04	2462.2	1233.26	1545.41	2567.46	1241.42	1335.32	2035.2	1485.4	1336.56	1746.03
sp|P21300|ALD1_MOUSE	Akr1b7	Aldo-keto reductase family 1 member B7 OS=Mus musculus OX=10090 GN=Akr1b7 PE=1 SV=4	300	4	C	UR	624.743	800.284	1931.11	678.394	746.509	836.27	2150.46	644.737	608.561	574.803	603.837
tr|G5E895|G5E895_MOUSE	Akr1b10	Aldo-keto reductase family 1, member B10 (aldose reductase) OS=Mus musculus OX=10090 GN=Akr1b10 PE=1 SV=1	300	4	C	UR	471.281	576.924	526.011	483.06	668.149	683.627	1104.03	483.249	516.784	460.393	470.327
tr|G3X9Y6|G3X9Y6_MOUSE	Akr1c19	Aldo-keto reductase family 1, member C19 OS=Mus musculus OX=10090 GN=Akr1c19 PE=1 SV=1	300	5	C	UR	1032.11	486.626	229.105	382.22	1024.37	668.681	316.657	844.164	467.109	700.88	675.54
sp|Q8VC28|AK1CD_MOUSE	Akr1c13	Aldo-keto reductase family 1 member C13 OS=Mus musculus OX=10090 GN=Akr1c13 PE=1 SV=2	300	14	C	UR	2492.13	3748.64	1273.19	2051.75	3249.87	1916.53	2675.11	2879.39	2258.67	2165.59	2263.24
sp|Q8K023|AKC1H_MOUSE	Akr1c18	Aldo-keto reductase family 1 member C18 OS=Mus musculus OX=10090 GN=Akr1c18 PE=1 SV=2	300	7	C	UR	1482.69	1504.99	322.006	1122.66	1215.21	1294.76	136.509	1085.21	814.121	981.328	826.884
tr|Q91WT7|Q91WT7_MOUSE	Akr1c14	3-alpha-hydroxysteroid dehydrogenase type 1 OS=Mus musculus OX=10090 GN=Akr1c14 PE=1 SV=1	300	4	C	UR	413.995	368.277	167.763	265.82	353.41	331.161	161.853	243.717	218.592	245.638	206.189
tr|Q9JLI0|Q9JLI0_MOUSE	Akr1c12	Aldo-keto reductase a OS=Mus musculus OX=10090 GN=Akr1c12 PE=1 SV=1	300	3	C	UR	179.903	135.946	18.2493	139.911	244.769	150.882	30.2168	158.018	149.614	148.093	134.343
sp|P45376|ALDR_MOUSE	Akr1b1	Aldo-keto reductase family 1 member B1 OS=Mus musculus OX=10090 GN=Akr1b1 PE=1 SV=3	300	7	C	UR	1156.91	1171.67	595.966	816.38	1674.92	1091.17	707.34	1042.54	772.47	965.986	731.097
sp|Q80U93|NU214_MOUSE	Nup214	Nuclear pore complex protein Nup214 OS=Mus musculus OX=10090 GN=Nup214 PE=1 SV=2	301	8	C	UR	813.504	1080.96	279.91	812.149	1040.03	752.704	324.629	993.188	859.196	868.649	821.564
sp|P15105|GLNA_MOUSE	Glul	Glutamine synthetase OS=Mus musculus OX=10090 GN=Glul PE=1 SV=6	302	8	C	UR	1037.16	1227.6	310.454	969.172	1675.19	1144.7	359.694	959.618	970.831	972.32	1081.68
sp|Q8R143|PTTG_MOUSE	Pttg1ip	Pituitary tumor-transforming gene 1 protein-interacting protein OS=Mus musculus OX=10090 GN=Pttg1ip PE=1 SV=1	303	1	C	UR	164.495	154.095	490.417	129.996	72.4772	102.9	718.204	98.441	96.8218	69.2002	110.034
sp|Q61092|LAMC2_MOUSE	Lamc2	Laminin subunit gamma-2 OS=Mus musculus OX=10090 GN=Lamc2 PE=1 SV=2	304	12	C	UR	889.654	1296.39	1322.79	1001.41	516.965	470.929	1192.69	487.302	535.608	377.224	838.005
sp|Q61129|CFAI_MOUSE	Cfi	Complement factor I OS=Mus musculus OX=10090 GN=Cfi PE=1 SV=3	305	11	C	UR	931.716	1054.99	448.81	875.381	1045.05	529.395	664.763	821.165	1087.19	1289.32	1115.39
sp|Q04592|PCSK5_MOUSE	Pcsk5	Proprotein convertase subtilisin/kexin type 5 OS=Mus musculus OX=10090 GN=Pcsk5 PE=1 SV=3	306	7	C	UR	956.4	616.94	1870.19	687.047	406.757	288.201	1798.74	331.656	199.763	340.112	333.21
sp|Q8K4G1|LTBP4_MOUSE	Ltbp4	Latent-transforming growth factor beta-binding protein 4 OS=Mus musculus OX=10090 GN=Ltbp4 PE=1 SV=2	307	12	C	UR	279.92	375.701	294.473	269.275	323.026	1256.43	183.983	241.171	872.529	887.034	203.385
sp|Q9D733|GP2_MOUSE	Gp2	Pancreatic secretory granule membrane major glycoprotein GP2 OS=Mus musculus OX=10090 GN=Gp2 PE=1 SV=3	308	4	C	UR	208.256	542.756	2552.02	550.409	127.545	350.612	1922	215.623	536.525	377.853	419.738
sp|Q6A009|LTN1_MOUSE	Ltn1	E3 ubiquitin-protein ligase listerin OS=Mus musculus OX=10090 GN=Ltn1 PE=1 SV=3	309	5	C	UR	859.872	662.117	1164.75	955.047	461.459	952.326	898.234	681.91	773.143	641.53	610.106
sp|Q922B9|ITPI2_MOUSE	Itprid2	Protein ITPRID2 OS=Mus musculus OX=10090 GN=Itprid2 PE=1 SV=3	310	4	C	UR	117.222	45.382	30.3002	108.371	42.867	165.78	36.2657	100.93	107.628	103.162	93.7565
sp|Q9R0H0|ACOX1_MOUSE	Acox1	Peroxisomal acyl-coenzyme A oxidase 1 OS=Mus musculus OX=10090 GN=Acox1 PE=1 SV=5	311	18	C	UR	5941.26	3152.04	1922.87	4584.05	2877.29	3306.8	2469.59	2230.93	2074.89	1935.02	2764.16
sp|Q8BI06|CEMIP_MOUSE	Cemip	Cell migration-inducing and hyaluronan-binding protein OS=Mus musculus OX=10090 GN=Cemip PE=1 SV=4	312	1	C	UR	26.5375	17.7277	15.2261	12.6456	13.0799	24.964	13.9279	20.3122	41.2202	18.4408	18.9964
sp|Q3THK7|GUAA_MOUSE	Gmps	GMP synthase [glutamine-hydrolyzing] OS=Mus musculus OX=10090 GN=Gmps PE=1 SV=2	313	5	C	UR	387.185	308.339	226.666	426.752	453.172	561.478	153.501	577.85	628.897	574.089	511.562
sp|Q64514|TPP2_MOUSE	Tpp2	Tripeptidyl-peptidase 2 OS=Mus musculus OX=10090 GN=Tpp2 PE=1 SV=3	314	23	C	UR	2922.21	3545.1	1256.27	2631.47	4179.42	2212.04	2339.51	2837.37	2845.21	2331.69	3114.92
sp|Q9JHU9|INO1_MOUSE	Isyna1	Inositol-3-phosphate synthase 1 OS=Mus musculus OX=10090 GN=Isyna1 PE=1 SV=1	315	11	C	UR	820.494	1131.85	1437.65	900.885	1221.7	897.546	2458.79	1470.86	1103.35	976.7	1172.35
tr|E9Q0B5|E9Q0B5_MOUSE	Fcgbp	Fc fragment of IgG-binding protein OS=Mus musculus OX=10090 GN=Fcgbp PE=1 SV=1	316	27	C	UR	3437.52	5152.22	8373.47	3350.11	6577.62	1466.82	5853.24	2557.62	2595.16	1710.7	2782.59
tr|E9PVG8|E9PVG8_MOUSE	9530053A07Rik	RIKEN cDNA 9530053A07 gene OS=Mus musculus OX=10090 GN=9530053A07Rik PE=1 SV=1	316	9	C	UR	986.507	3295.09	457.165	118.964	287.955	1322.14	433.842	177.731	267.744	167.259	192.815
sp|P59997|KDM2A_MOUSE	Kdm2a	Lysine-specific demethylase 2A OS=Mus musculus OX=10090 GN=Kdm2a PE=1 SV=2	317	1	C	UR	32.376	30.7498	9.51737	35.4022	39.9261	43.6805	2.33168	43.3217	61.3873	41.8552	43.4656
sp|P62908|RS3_MOUSE	Rps3	40S ribosomal protein S3 OS=Mus musculus OX=10090 GN=Rps3 PE=1 SV=1	318	16	C	UR	2273.34	2691.24	2631.19	3140.14	2592.06	2499.53	2673.08	2977.45	3005.86	2191.98	3164.16
sp|P61164|ACTZ_MOUSE	Actr1a	Alpha-centractin OS=Mus musculus OX=10090 GN=Actr1a PE=1 SV=1	319	7	C	UR	708.157	584.306	173.518	611.881	1274.34	692.862	150.81	927.927	739.533	729.596	1128.36
sp|Q8R5C5|ACTY_MOUSE	Actr1b	Beta-centractin OS=Mus musculus OX=10090 GN=Actr1b PE=1 SV=1	319	2	C	UR	80.7412	52.039	4.65412	57.3079	156.097	81.9031	3.52294	101.606	62.6914	80.3917	114.003
sp|P22682|CBL_MOUSE	Cbl	E3 ubiquitin-protein ligase CBL OS=Mus musculus OX=10090 GN=Cbl PE=1 SV=3	320	2	C	UR	87.9899	106.192	50.3177	111.168	72.8583	96.1275	31.0555	91.1752	130.331	109.22	77.3224
sp|Q8BFZ9|ERLN2_MOUSE	Erlin2	Erlin-2 OS=Mus musculus OX=10090 GN=Erlin2 PE=1 SV=1	321	11	C	UR	1681.54	1373.89	1225.93	1523.55	1521.74	1081.19	941.044	1153.62	1030.79	1062.66	1370.27
sp|Q91X78|ERLN1_MOUSE	Erlin1	Erlin-1 OS=Mus musculus OX=10090 GN=Erlin1 PE=1 SV=2	321	9	C	UR	1101.26	1031.28	1764.63	1093.05	473.49	737.734	1720.15	511.06	703.691	595.716	666.009
sp|P63044|VAMP2_MOUSE	Vamp2	Vesicle-associated membrane protein 2 OS=Mus musculus OX=10090 GN=Vamp2 PE=1 SV=2	322	1	C	UR	15.0114	11.3036	24.5507	16.3931	4.62638	21.9674	50.6898	7.94257	15.3206	15.1281	11.1209
sp|P08071|TRFL_MOUSE	Ltf	Lactotransferrin OS=Mus musculus OX=10090 GN=Ltf PE=1 SV=4	323	20	C	UR	3370.86	2500.36	5117.4	2271.84	1819.81	1578.38	6381.45	3183.56	5386.45	4997.19	3512.4
sp|Q9CRA8|EXOS5_MOUSE	Exosc5	Exosome complex component RRP46 OS=Mus musculus OX=10090 GN=Exosc5 PE=1 SV=1	324	3	C	UR	571.064	637.622	326.442	642.227	955.141	574.97	219.87	844.636	874.954	766.51	897.428
sp|A6X935|ITIH4_MOUSE	Itih4	Inter alpha-trypsin inhibitor, heavy chain 4 OS=Mus musculus OX=10090 GN=Itih4 PE=1 SV=2	325	16	C	UR	1468.88	1869.52	2053.21	1714.61	1321.73	1626.48	2641.11	1629.35	2508.24	2627.26	1735.97
tr|E9Q616|E9Q616_MOUSE	Ahnak	AHNAK nucleoprotein (desmoyokin) OS=Mus musculus OX=10090 GN=Ahnak PE=1 SV=1	326	22	C	UR	2240.45	2858.22	3929.23	4594.93	3678.01	1433.19	1074.88	4422.23	4865.63	4371.55	10298.1
sp|Q9QZN4|FBX6_MOUSE	Fbxo6	F-box only protein 6 OS=Mus musculus OX=10090 GN=Fbxo6 PE=1 SV=1	327	4	C	UR	242.473	267.385	824.095	190.244	252.735	144.122	798.632	196.5	199.098	185.803	254.839
sp|P35822|PTPRK_MOUSE	Ptprk	Receptor-type tyrosine-protein phosphatase kappa OS=Mus musculus OX=10090 GN=Ptprk PE=1 SV=1	328	14	C	UR	1921.58	2136.4	1300.21	1917.94	2209.14	1766.02	893.619	1876.31	1750.3	1609.77	1724.7
sp|Q69ZN7|MYOF_MOUSE	Myof	Myoferlin OS=Mus musculus OX=10090 GN=Myof PE=1 SV=2	329	22	C	UR	4442.39	5834.3	11250.6	5826	2721.29	4735.55	12902.8	3406.49	5411.5	3970.19	5026.02
sp|Q9ESD7-2|DYSF_MOUSE	Dysf	Isoform 2 of Dysferlin OS=Mus musculus OX=10090 GN=Dysf	329	5	C	UR	452.527	519.106	1371.84	518.212	198.282	2772.07	903.115	267.315	950.132	870.343	240.385
sp|Q9JHE3|ASAH2_MOUSE	Asah2	Neutral ceramidase OS=Mus musculus OX=10090 GN=Asah2 PE=1 SV=1	330	3	C	UR	352.339	213.215	969.193	193.219	235.984	224.61	769.634	168.916	244.858	194.753	323.818
sp|P70236|MP2K6_MOUSE	Map2k6	Dual specificity mitogen-activated protein kinase kinase 6 OS=Mus musculus OX=10090 GN=Map2k6 PE=1 SV=1	331	2	C	UR	451.237	440.015	635.248	496.291	378.117	584.09	434.433	472.496	534.347	543.192	416.557
sp|O09110|MP2K3_MOUSE	Map2k3	Dual specificity mitogen-activated protein kinase kinase 3 OS=Mus musculus OX=10090 GN=Map2k3 PE=1 SV=2	331	1	C	UR	179.319	70.873	103.874	129.408	63.2018	208.036	50.8891	170.102	177.828	164.095	127.021
sp|Q3UDE2|TTL12_MOUSE	Ttll12	Tubulin--tyrosine ligase-like protein 12 OS=Mus musculus OX=10090 GN=Ttll12 PE=1 SV=1	332	5	C	UR	360.811	345.771	157.886	396.288	453.907	428.298	156.452	501.656	448.433	448.545	412.1
sp|Q68FD5|CLH1_MOUSE	Cltc	Clathrin heavy chain 1 OS=Mus musculus OX=10090 GN=Cltc PE=1 SV=3	333	21	C	UR	4302	4287.42	600.015	5749.64	3773.46	4473.67	471.985	4136.01	4255.22	3719.17	4347.62
sp|Q922B2|SYDC_MOUSE	Dars1	Aspartate--tRNA ligase, cytoplasmic OS=Mus musculus OX=10090 GN=Dars1 PE=1 SV=2	334	15	C	UR	2412.34	1814.14	1959.39	2680.74	2053.67	3052.08	2450.18	2381.99	2702.68	2432.27	2204.44
sp|Q63829|COMD3_MOUSE	Commd3	COMM domain-containing protein 3 OS=Mus musculus OX=10090 GN=Commd3 PE=1 SV=1	335	6	C	UR	668.093	586.216	229.831	763.051	1431.71	672.186	121.03	1204.76	832.403	1013.9	1026.4
sp|P61971|NTF2_MOUSE	Nutf2	Nuclear transport factor 2 OS=Mus musculus OX=10090 GN=Nutf2 PE=1 SV=1	336	6	C	UR	916.412	1487.83	104.69	704.023	1286.55	661.546	1104.07	911.205	788.223	868.921	894.373
sp|P35700|PRDX1_MOUSE	Prdx1	Peroxiredoxin-1 OS=Mus musculus OX=10090 GN=Prdx1 PE=1 SV=1	337	16	C	UR	4539.48	4977.93	3194.85	3271.59	3485.1	3156.15	3782.92	4051.16	3331.7	4333.01	3885.29
sp|O08807|PRDX4_MOUSE	Prdx4	Peroxiredoxin-4 OS=Mus musculus OX=10090 GN=Prdx4 PE=1 SV=1	337	3	C	UR	845.236	876.097	1055.01	697.781	828.574	618.178	1057.9	834.116	790.854	811.268	836.344
sp|Q8BVF7|APH1A_MOUSE	Aph1a	Gamma-secretase subunit APH-1A OS=Mus musculus OX=10090 GN=Aph1a PE=1 SV=2	338	2	C	UR	253.563	219.621	334.147	256.449	118.108	195.704	316.907	134.3	191.557	148.36	200.561
sp|Q8BXN9-2|TM87A_MOUSE	Tmem87a	Isoform 2 of Transmembrane protein 87A OS=Mus musculus OX=10090 GN=Tmem87a	339	4	C	UR	499.109	251.668	850.576	630.221	215.542	756.307	387.012	312.638	390.694	381.577	238.631
sp|Q9CZW5|TOM70_MOUSE	Tomm70	Mitochondrial import receptor subunit TOM70 OS=Mus musculus OX=10090 GN=Tomm70 PE=1 SV=2	340	11	C	UR	1707.04	1146.01	1095.88	1944.11	863.599	1833.91	738.211	1209.05	1512.29	1515.72	1099.22
sp|Q61879|MYH10_MOUSE	Myh10	Myosin-10 OS=Mus musculus OX=10090 GN=Myh10 PE=1 SV=2	341	20	C	UR	2401.47	2543.33	801.77	3754.93	2485.19	9433.76	1425.86	2836.41	3618.18	4607.26	2378.02
sp|Q8VDD5|MYH9_MOUSE	Myh9	Myosin-9 OS=Mus musculus OX=10090 GN=Myh9 PE=1 SV=4	341	26	C	UR	3653.48	4203.32	1656.26	5959.43	3660.7	2725.1	2690.43	3731.58	4524.33	3506.87	4061.29
sp|Q6URW6|MYH14_MOUSE	Myh14	Myosin-14 OS=Mus musculus OX=10090 GN=Myh14 PE=1 SV=1	341	30	C	UR	4201.22	3836.39	549.448	4275.96	4096.9	3361.52	1068.5	3906.92	3003.1	3027.13	5063.21
sp|O08638-2|MYH11_MOUSE	Myh11	Isoform 2 of Myosin-11 OS=Mus musculus OX=10090 GN=Myh11	341	15	C	UR	782.1	701.793	541.609	2895.08	846.613	14791	646.602	2027.36	1857.86	4659.95	518.224
tr|A0A338P6K2|A0A338P6K2_MOUSE	Myh11	Myosin-11 OS=Mus musculus OX=10090 GN=Myh11 PE=1 SV=1	341	2	C	UR	62.5264	48.3671	64.706	181.819	97.5457	1792.57	53.6578	273.093	148.923	941.148	48.4107
sp|Q5SX40|MYH1_MOUSE	Myh1	Myosin-1 OS=Mus musculus OX=10090 GN=Myh1 PE=1 SV=1	341	6	C	UR	672.764	131.756	910.74	1092.49	60.2575	871.305	157.476	431.257	91.2701	391.233	114.849
sp|Q5SX39|MYH4_MOUSE	Myh4	Myosin-4 OS=Mus musculus OX=10090 GN=Myh4 PE=2 SV=1	341	1	C	UR	126.895	17.7791	26.4053	199.17	16.9314	11.7001	18.1286	117.745	9.86111	56.2128	30.7636
sp|Q99LB7|SARDH_MOUSE	Sardh	Sarcosine dehydrogenase, mitochondrial OS=Mus musculus OX=10090 GN=Sardh PE=1 SV=1	342	3	C	UR	407.231	275.33	290.077	308.8	455.732	248.574	337.192	262.999	312.802	175.556	213.94
sp|Q9Z1Q9|SYVC_MOUSE	Vars1	Valine--tRNA ligase OS=Mus musculus OX=10090 GN=Vars1 PE=1 SV=1	343	20	C	UR	2464.32	2888.35	697.481	2357.35	2898.55	2704.93	712.714	2913.47	2789.11	2504.06	2572.49
sp|Q80XP8|FA76B_MOUSE	Fam76b	Protein FAM76B OS=Mus musculus OX=10090 GN=Fam76b PE=1 SV=1	345	2	C	UR	101.517	61.8181	60.3959	78.0766	59.6401	117.543	36.7067	109.465	97.3658	113.256	79.353
sp|Q60854|SPB6_MOUSE	Serpinb6	Serpin B6 OS=Mus musculus OX=10090 GN=Serpinb6 PE=1 SV=1	346	18	C	UR	2932.83	3068.32	9916.86	1824.11	2867.71	1562.19	9187.46	1981.98	1620.35	1832.69	2186.15
tr|K7E6F1|K7E6F1_MOUSE	Serpinb6a	Serine (or cysteine) peptidase inhibitor, clade B, member 6a (Fragment) OS=Mus musculus OX=10090 GN=Serpinb6a PE=1 SV=1	346	1	C	UR	15.429	16.5032	41.2182	13.2682	17.9521	12.9445	12.2673	17	8.59767	12.9215	11.7675
sp|P13597|ICAM1_MOUSE	Icam1	Intercellular adhesion molecule 1 OS=Mus musculus OX=10090 GN=Icam1 PE=1 SV=1	347	5	C	UR	627.165	572.253	2091.12	778.574	401.6	1029.29	4421.93	858.112	1827.24	1224.52	746.973
sp|Q9CQ06|RM24_MOUSE	Mrpl24	39S ribosomal protein L24, mitochondrial OS=Mus musculus OX=10090 GN=Mrpl24 PE=1 SV=1	348	4	C	UR	297.675	429.457	118.792	372.863	699.397	157.525	106.522	529.451	337.408	339.857	563.897
sp|P13634|CAH1_MOUSE	Ca1	Carbonic anhydrase 1 OS=Mus musculus OX=10090 GN=Ca1 PE=1 SV=4	349	30	C	UR	6003.52	7431.76	4543.85	4059.52	5336.06	2704.78	3040.55	3255.19	2772.95	3060.12	2907.08
tr|D3YYQ4|D3YYQ4_MOUSE	Car1	Carbonic anhydrase (Fragment) OS=Mus musculus OX=10090 GN=Car1 PE=1 SV=1	349	1	C	UR	346.767	496.177	1421.3	318.189	363.954	172.138	1184.08	277.328	145.038	229.699	209.444
sp|O08749|DLDH_MOUSE	Dld	Dihydrolipoyl dehydrogenase, mitochondrial OS=Mus musculus OX=10090 GN=Dld PE=1 SV=2	350	13	C	UR	1999.45	2129.11	3700.71	2119.75	2357.34	1213.12	5470.11	1473.6	1252.44	1339.32	1875.18
sp|Q7TMY8|HUWE1_MOUSE	Huwe1	E3 ubiquitin-protein ligase HUWE1 OS=Mus musculus OX=10090 GN=Huwe1 PE=1 SV=5	351	13	C	UR	1849.32	1880.85	1067.89	1977.11	1778.5	1991.07	1420.22	1849.07	2053.52	1773.67	1858.24
sp|Q8CHR6|DPYD_MOUSE	Dpyd	Dihydropyrimidine dehydrogenase [NADP(+)] OS=Mus musculus OX=10090 GN=Dpyd PE=1 SV=1	352	8	C	UR	542.589	490.317	214.529	426.426	607.144	432.496	140.484	455.945	286.199	353.166	335.023
sp|P14206|RSSA_MOUSE	Rpsa	40S ribosomal protein SA OS=Mus musculus OX=10090 GN=Rpsa PE=1 SV=4	353	10	C	UR	1398.96	1802.32	355.213	1620.55	1990.8	1421.61	569.575	2084.35	1783.29	1664.9	2352.14
sp|P58137|ACOT8_MOUSE	Acot8	Acyl-coenzyme A thioesterase 8 OS=Mus musculus OX=10090 GN=Acot8 PE=1 SV=1	354	5	C	UR	604.223	532.514	479.039	577.667	588.883	479.193	388.066	531.721	403.747	374.002	700.529
sp|Q91VW5|GOGA4_MOUSE	Golga4	Golgin subfamily A member 4 OS=Mus musculus OX=10090 GN=Golga4 PE=1 SV=2	355	27	C	UR	6301.64	4487.36	850.388	4272.37	5452.07	4792.67	751.22	5474.7	5158.27	5379.35	5168.52
sp|P58021|TM9S2_MOUSE	Tm9sf2	Transmembrane 9 superfamily member 2 OS=Mus musculus OX=10090 GN=Tm9sf2 PE=1 SV=1	356	13	C	UR	3174.37	1488.55	3308.5	2748.66	1511.39	3080.39	2489.61	1402.08	1530.2	1380.97	1240.76
sp|Q6ZWX6|IF2A_MOUSE	Eif2s1	Eukaryotic translation initiation factor 2 subunit 1 OS=Mus musculus OX=10090 GN=Eif2s1 PE=1 SV=3	357	6	C	UR	1017.29	1180.51	714.009	968.489	1445.09	786.485	625.386	1153.09	1079.1	955.361	1276.63
sp|Q8VE62|PAIP1_MOUSE	Paip1	Polyadenylate-binding protein-interacting protein 1 OS=Mus musculus OX=10090 GN=Paip1 PE=1 SV=1	358	2	C	UR	216.046	212.571	91.6332	201.507	172.204	164.292	57.3652	152.403	218.313	144.517	184.754
sp|Q61503|5NTD_MOUSE	Nt5e	5'-nucleotidase OS=Mus musculus OX=10090 GN=Nt5e PE=1 SV=2	359	6	C	UR	277.944	493.192	1859.26	374.684	276.929	854.947	2058.56	300.516	325.148	266.141	571.611
sp|P15920|VPP2_MOUSE	Atp6v0a2	V-type proton ATPase 116 kDa subunit a2 OS=Mus musculus OX=10090 GN=Atp6v0a2 PE=1 SV=2	360	6	C	UR	1193.78	1170.5	1131.12	1247.17	804.113	1227.6	441.168	569.363	684.479	600.192	527.585
sp|Q9Z1G4|VPP1_MOUSE	Atp6v0a1	V-type proton ATPase 116 kDa subunit a1 OS=Mus musculus OX=10090 GN=Atp6v0a1 PE=1 SV=3	360	8	C	UR	842.011	854.906	1246.59	1097.41	469.794	1089.44	998.915	551.728	877.732	675.766	561.491
tr|Q9JHF5|Q9JHF5_MOUSE	Tcirg1	V-type proton ATPase subunit a OS=Mus musculus OX=10090 GN=Tcirg1 PE=1 SV=1	360	4	C	UR	270.805	250.822	126.789	258.034	155.669	288.93	108.353	173.386	311.907	247.823	158.348
sp|Q8VE22|RT23_MOUSE	Mrps23	28S ribosomal protein S23, mitochondrial OS=Mus musculus OX=10090 GN=Mrps23 PE=1 SV=1	361	6	C	UR	356.615	445.458	165.873	464.564	585.348	183.15	100.612	483.313	365.389	357.758	542.069
sp|P10649|GSTM1_MOUSE	Gstm1	Glutathione S-transferase Mu 1 OS=Mus musculus OX=10090 GN=Gstm1 PE=1 SV=2	362	13	C	UR	926.279	1150.1	1516.93	818.824	1483.14	818.202	1703.45	830.779	774.898	642.131	750.619
sp|Q80W21|GSTM7_MOUSE	Gstm7	Glutathione S-transferase Mu 7 OS=Mus musculus OX=10090 GN=Gstm7 PE=1 SV=1	362	7	C	UR	1062.95	1172.78	4877.08	928.798	1714.93	739.651	4038.74	868.387	853.876	658.511	1029.79
sp|P15626|GSTM2_MOUSE	Gstm2	Glutathione S-transferase Mu 2 OS=Mus musculus OX=10090 GN=Gstm2 PE=1 SV=2	362	5	C	UR	897.487	1206.68	2220.74	837.785	1478.97	800.825	2358.3	936.436	768.839	707.681	815.67
sp|P19639|GSTM3_MOUSE	Gstm3	Glutathione S-transferase Mu 3 OS=Mus musculus OX=10090 GN=Gstm3 PE=1 SV=2	362	8	C	UR	890.913	2748.77	1587.23	1112.74	1346.38	923.364	1725.6	1074.33	754.042	874.894	801.165
sp|P48774|GSTM5_MOUSE	Gstm5	Glutathione S-transferase Mu 5 OS=Mus musculus OX=10090 GN=Gstm5 PE=1 SV=1	362	8	C	UR	1504.15	1609.05	1130.4	1330.93	2045.96	1291.78	1265.4	1288.51	1141.54	1175.72	1281.64
sp|Q8R5I6|GSTM4_MOUSE	Gstm4	Glutathione S-transferase Mu 4 OS=Mus musculus OX=10090 GN=Gstm4 PE=1 SV=1	362	6	C	UR	234.482	303.412	531.701	215.159	340.633	209.071	463.09	212.5	173.847	172.187	174.767
sp|O35660|GSTM6_MOUSE	Gstm6	Glutathione S-transferase Mu 6 OS=Mus musculus OX=10090 GN=Gstm6 PE=1 SV=4	362	1	C	UR	30.9763	43.6272	17.6135	19.3426	29.9876	13.4769	16.9598	14.463	10.943	13.9643	15.4185
sp|Q8C159|TTC22_MOUSE	Ttc22	Tetratricopeptide repeat protein 22 OS=Mus musculus OX=10090 GN=Ttc22 PE=2 SV=1	363	1	C	UR	31.8893	25.7929	34.7195	21.8792	23.6768	24.3756	35.5691	22.594	26.9531	17.1067	26.5368
sp|Q00519|XDH_MOUSE	Xdh	Xanthine dehydrogenase/oxidase OS=Mus musculus OX=10090 GN=Xdh PE=1 SV=5	364	26	C	UR	2679.12	2378.53	6857.37	1840.81	2530.01	2685.75	8171.62	2836.81	2716	3167.2	2565.76
sp|Q8BJ37|TYDP1_MOUSE	Tdp1	Tyrosyl-DNA phosphodiesterase 1 OS=Mus musculus OX=10090 GN=Tdp1 PE=1 SV=2	365	3	C	UR	350.728	482.609	419.456	449.797	491.493	381.718	667.006	514.794	446.965	431.231	411.227
sp|P62897|CYC_MOUSE	Cycs	Cytochrome c, somatic OS=Mus musculus OX=10090 GN=Cycs PE=1 SV=2	366	11	C	UR	816.126	6296.62	1793.97	1638.31	1062.57	671.929	2519.41	1021.65	841.241	953.975	782.795
sp|P07901|HS90A_MOUSE	Hsp90aa1	Heat shock protein HSP 90-alpha OS=Mus musculus OX=10090 GN=Hsp90aa1 PE=1 SV=4	367	25	C	UR	3040.42	2094.11	855.528	2772.4	5319.45	3021.32	726.196	6453.63	5227.75	5280.48	4657.15
sp|P11499|HS90B_MOUSE	Hsp90ab1	Heat shock protein HSP 90-beta OS=Mus musculus OX=10090 GN=Hsp90ab1 PE=1 SV=3	367	15	C	UR	1943.41	928.43	528.343	1455.25	2657.6	1653.06	522.155	2918.05	2569.71	2280.08	2588.32
sp|Q9CQN1|TRAP1_MOUSE	Trap1	Heat shock protein 75 kDa, mitochondrial OS=Mus musculus OX=10090 GN=Trap1 PE=1 SV=1	367	12	C	UR	1723.97	1607.55	1743.09	2092.86	1005.1	2059.16	722.841	1502.71	1660.98	1813.07	1333.95
sp|P08113|ENPL_MOUSE	Hsp90b1	Endoplasmin OS=Mus musculus OX=10090 GN=Hsp90b1 PE=1 SV=2	367	19	C	UR	3007.77	2442.91	3468.74	3510.64	3733.3	2559.89	1598.34	3762.75	3718.45	2913.4	3507.04
sp|Q99J39|DCMC_MOUSE	Mlycd	Malonyl-CoA decarboxylase, mitochondrial OS=Mus musculus OX=10090 GN=Mlycd PE=1 SV=1	368	4	C	UR	390.854	422.849	393.957	435.477	471.901	345.848	304.912	368.843	313.089	259.35	402.791
sp|E9Q414|APOB_MOUSE	Apob	Apolipoprotein B-100 OS=Mus musculus OX=10090 GN=Apob PE=1 SV=1	369	16	C	UR	1806.78	1665.36	2979.92	1333.89	996.947	1327.39	3250.77	1079.43	2371.62	1955.14	1570.31
sp|Q8VHP7|ILEUB_MOUSE	Serpinb1b	Leukocyte elastase inhibitor B OS=Mus musculus OX=10090 GN=Serpinb1b PE=1 SV=1	370	7	C	UR	672.248	2100.03	2687.5	552.676	769.296	441.261	2224.41	516.257	417.793	557.824	543.7
sp|Q9D154|ILEUA_MOUSE	Serpinb1a	Leukocyte elastase inhibitor A OS=Mus musculus OX=10090 GN=Serpinb1a PE=1 SV=1	370	18	C	UR	3093.81	3418.05	11336.4	2146.29	2912.51	1703.21	9074.57	2535.02	1800.93	2042.77	2752.07
sp|Q9JK88|SPI2_MOUSE	Serpini2	Serpin I2 OS=Mus musculus OX=10090 GN=Serpini2 PE=1 SV=1	370	5	C	UR	173.498	303.548	2783.12	272.726	113.709	75.6354	2291.68	217.712	486.791	278.722	279.139
tr|O08797|O08797_MOUSE	Serpinb9	SPI6 OS=Mus musculus OX=10090 GN=Serpinb9 PE=1 SV=1	370	7	C	UR	675.1	647.064	3088.88	517.485	706.117	832.656	4280.86	630.575	975.9	730.212	617.773
sp|Q8BTI7|ANR52_MOUSE	Ankrd52	Serine/threonine-protein phosphatase 6 regulatory ankyrin repeat subunit C OS=Mus musculus OX=10090 GN=Ankrd52 PE=1 SV=1	371	1	C	UR	81.5589	75.0829	94.3335	117.28	78.3965	89.3593	39.3768	92.5641	111.37	88.9377	83.2236
sp|Q9D0R2|SYTC_MOUSE	Tars1	Threonine--tRNA ligase 1, cytoplasmic OS=Mus musculus OX=10090 GN=Tars1 PE=1 SV=2	372	18	C	UR	3697.75	5292.68	3512.64	3359.31	5500.7	2930.24	3503.42	4058.13	3973.83	2892.17	3690.88
sp|Q8BLY2|SYTC2_MOUSE	Tars3	Threonine--tRNA ligase 2, cytoplasmic OS=Mus musculus OX=10090 GN=Tars3 PE=1 SV=1	372	2	C	UR	146.413	162.38	159.912	168.378	144.031	164.671	127.091	126.451	125.931	107.744	128.833
sp|P52633|STAT6_MOUSE	Stat6	Signal transducer and transcription activator 6 OS=Mus musculus OX=10090 GN=Stat6 PE=1 SV=2	373	3	C	UR	552.125	647.416	65.2109	601.639	390.073	555.607	156.779	463.701	582.332	517.084	473.13
sp|Q9D0F9|PGM1_MOUSE	Pgm1	Phosphoglucomutase-1 OS=Mus musculus OX=10090 GN=Pgm1 PE=1 SV=4	374	14	C	UR	3658.15	3434.35	1685.49	2601.06	4161.43	2104.82	1136.68	2311.44	1951.18	1982.65	2197.95
sp|Q8BZF8|PGM5_MOUSE	Pgm5	Phosphoglucomutase-like protein 5 OS=Mus musculus OX=10090 GN=Pgm5 PE=1 SV=2	374	14	C	UR	713.804	776.132	2762.57	1109.02	829.172	6492.39	4175.06	591.429	1332.69	1936.08	578.396
sp|Q6PDG5|SMRC2_MOUSE	Smarcc2	SWI/SNF complex subunit SMARCC2 OS=Mus musculus OX=10090 GN=Smarcc2 PE=1 SV=2	375	13	C	UR	1494.66	1259.9	211.53	1148.91	1684.35	1162.47	158.221	1976.19	1802.88	1891.65	1566.77
sp|P97496|SMRC1_MOUSE	Smarcc1	SWI/SNF complex subunit SMARCC1 OS=Mus musculus OX=10090 GN=Smarcc1 PE=1 SV=2	375	4	C	UR	171.433	105.424	40.0752	193.797	344.746	133.395	18.3293	509.505	498.817	594.191	361.514
sp|Q9Z1F9|SAE2_MOUSE	Uba2	SUMO-activating enzyme subunit 2 OS=Mus musculus OX=10090 GN=Uba2 PE=1 SV=1	376	4	C	UR	804.737	455.123	384.059	739.792	745.509	1034.56	233.75	851.512	866.32	801.761	780.278
sp|Q8K009|AL1L2_MOUSE	Aldh1l2	Mitochondrial 10-formyltetrahydrofolate dehydrogenase OS=Mus musculus OX=10090 GN=Aldh1l2 PE=1 SV=2	377	12	C	UR	904.165	973.629	1202.28	963.66	1866.45	957.949	1872.83	997.82	692.112	755.793	1093.41
sp|Q8R0Y6|AL1L1_MOUSE	Aldh1l1	Cytosolic 10-formyltetrahydrofolate dehydrogenase OS=Mus musculus OX=10090 GN=Aldh1l1 PE=1 SV=1	377	24	C	UR	3197.28	4541.27	2156.09	2920.44	6783.47	1844.53	2427.36	3380.62	2509.92	2452.48	4586.94
sp|Q9DB05|SNAA_MOUSE	Napa	Alpha-soluble NSF attachment protein OS=Mus musculus OX=10090 GN=Napa PE=1 SV=1	378	10	C	UR	2047.57	1800.38	770.942	2015.05	2563.09	1715.36	551.17	1680.46	1654.64	1401.68	2192.32
sp|Q9WVE8|PACN2_MOUSE	Pacsin2	Protein kinase C and casein kinase substrate in neurons protein 2 OS=Mus musculus OX=10090 GN=Pacsin2 PE=1 SV=1	379	10	C	UR	1807.1	1953.03	396.21	1469.59	2279.93	1391.44	250.076	1892.33	1575.98	1453.95	1735.04
sp|P18654|KS6A3_MOUSE	Rps6ka3	Ribosomal protein S6 kinase alpha-3 OS=Mus musculus OX=10090 GN=Rps6ka3 PE=1 SV=2	380	11	C	UR	3086.17	2360.43	2024.21	3345.23	1968.35	3614.77	1518.55	2512.82	3034.71	2889.16	2795.9
sp|P18653|KS6A1_MOUSE	Rps6ka1	Ribosomal protein S6 kinase alpha-1 OS=Mus musculus OX=10090 GN=Rps6ka1 PE=1 SV=1	380	12	C	UR	2881.07	1943.71	1586.68	2313.52	1666.2	3046.58	1553.46	2336.28	2203.63	2512.03	2348.83
sp|Q60592|MAST2_MOUSE	Mast2	Microtubule-associated serine/threonine-protein kinase 2 OS=Mus musculus OX=10090 GN=Mast2 PE=1 SV=1	380	2	C	UR	113.306	81.5751	62.9115	137.104	95.814	131.996	46.2921	143.25	207.683	174.56	139.627
sp|Q8C0V0|TLK1_MOUSE	Tlk1	Serine/threonine-protein kinase tousled-like 1 OS=Mus musculus OX=10090 GN=Tlk1 PE=1 SV=2	380	2	C	UR	289.16	265.885	104.435	235.015	227.537	257.282	43.8986	245.435	241.974	223.832	213.103
sp|Q8BY87|UBP47_MOUSE	Usp47	Ubiquitin carboxyl-terminal hydrolase 47 OS=Mus musculus OX=10090 GN=Usp47 PE=1 SV=2	381	10	C	UR	1666.17	1255.52	530.659	1583.42	1259.56	1797.68	480.993	1623.18	1870.14	1813	1660.72
sp|Q60710|SAMH1_MOUSE	Samhd1	Deoxynucleoside triphosphate triphosphohydrolase SAMHD1 OS=Mus musculus OX=10090 GN=Samhd1 PE=1 SV=3	382	13	C	UR	1659.24	889.536	556.521	1145.21	1689.34	2130.19	654.37	1924.35	2190.43	2000.78	1530.42
sp|Q8VHF2-2|CDHR5_MOUSE	Cdhr5	Isoform 2 of Cadherin-related family member 5 OS=Mus musculus OX=10090 GN=Cdhr5	383	8	C	UR	575.655	578.054	771.925	499.153	479.239	324.481	949.005	379.178	340.021	317.183	452.775
sp|Q923G2|RPAB3_MOUSE	Polr2h	DNA-directed RNA polymerases I, II, and III subunit RPABC3 OS=Mus musculus OX=10090 GN=Polr2h PE=1 SV=3	384	2	C	UR	181.491	262.768	40.5716	217.03	319.828	193.042	49.3063	310.214	180.978	256.839	257.103
sp|Q8BJW5|NOL11_MOUSE	Nol11	Nucleolar protein 11 OS=Mus musculus OX=10090 GN=Nol11 PE=2 SV=1	385	4	C	UR	287.134	338.426	137.888	353.273	323.025	279.093	180.047	392.648	442.805	303.558	345.915
sp|B1AZI6|THOC2_MOUSE	Thoc2	THO complex subunit 2 OS=Mus musculus OX=10090 GN=Thoc2 PE=1 SV=1	386	3	C	UR	562.765	425.906	713.286	711.693	332.309	876.127	695.111	583.869	695.446	535.489	515.775
sp|P63321|RALA_MOUSE	Rala	Ras-related protein Ral-A OS=Mus musculus OX=10090 GN=Rala PE=1 SV=1	387	4	C	UR	393.094	461.163	509.033	485.289	257.286	435.494	508.471	332.072	308.2	325.195	418.072
sp|Q9JIW9|RALB_MOUSE	Ralb	Ras-related protein Ral-B OS=Mus musculus OX=10090 GN=Ralb PE=1 SV=1	387	3	C	UR	625.665	695.763	1063.05	788.526	416.445	623.746	1150.32	584.125	682.508	779.853	751.192
sp|P62264|RS14_MOUSE	Rps14	40S ribosomal protein S14 OS=Mus musculus OX=10090 GN=Rps14 PE=1 SV=3	388	3	C	UR	24.3546	127.542	15.4547	48.6902	29.7198	21.1935	15.46	40.3029	40.2179	42.4893	38.4095
sp|Q921I1|TRFE_MOUSE	Tf	Serotransferrin OS=Mus musculus OX=10090 GN=Tf PE=1 SV=1	389	32	C	UR	3743.63	5919.16	3932.27	4180.5	4116.59	2205.51	6097	2803.68	3424.45	3951.35	3140.48
sp|Q9DBD0|ICA_MOUSE	Ica	Inhibitor of carbonic anhydrase OS=Mus musculus OX=10090 GN=Ica PE=1 SV=1	389	9	C	UR	772.94	1051.38	1160.6	704.861	783.73	540.352	1307.84	675.489	672.494	876.317	719.079
sp|Q8BJ64|CHDH_MOUSE	Chdh	Choline dehydrogenase, mitochondrial OS=Mus musculus OX=10090 GN=Chdh PE=1 SV=1	390	14	C	UR	3274.73	2304.22	2725.08	2256.63	2315.62	2958.42	2357.32	2310.57	1883.69	2257.85	2067.4
sp|P54763-4|EPHB2_MOUSE	Ephb2	Isoform 4 of Ephrin type-B receptor 2 OS=Mus musculus OX=10090 GN=Ephb2	391	10	C	UR	1050.16	1234.75	1375.12	1205.25	1493.04	784.049	1180.66	1120.68	1005.14	886.084	1319.07
sp|Q9D2Z1|CEA20_MOUSE	Ceacam20	Carcinoembryonic antigen-related cell adhesion molecule 20 OS=Mus musculus OX=10090 GN=Ceacam20 PE=1 SV=1	392	11	C	UR	1036.86	1059.35	3564.36	1043.34	900.555	596.62	3606.71	893.029	866.088	719.956	1269.38
sp|Q9JLQ2|GIT2_MOUSE	Git2	ARF GTPase-activating protein GIT2 OS=Mus musculus OX=10090 GN=Git2 PE=1 SV=2	393	4	C	UR	170.681	152.932	120.274	213.104	145.365	231.519	69.048	226.382	311.992	295.497	227.248
sp|Q07113|MPRI_MOUSE	Igf2r	Cation-independent mannose-6-phosphate receptor OS=Mus musculus OX=10090 GN=Igf2r PE=1 SV=1	394	16	C	UR	1438.49	1379.2	4474.81	1570.51	991.219	1283.73	5528.55	981.909	1116.05	1068.48	1169.01
sp|Q02819|NUCB1_MOUSE	Nucb1	Nucleobindin-1 OS=Mus musculus OX=10090 GN=Nucb1 PE=1 SV=2	395	13	C	UR	934.347	1834.53	2201.27	1694.35	3918.43	550.65	494.068	2855.81	1850.79	2115.24	2942.8
sp|P16332|MUTA_MOUSE	Mmut	Methylmalonyl-CoA mutase, mitochondrial OS=Mus musculus OX=10090 GN=Mmut PE=1 SV=2	396	8	C	UR	1672.59	1694.53	817.639	1732.92	2211.85	1340.43	1035.76	1474.48	1047.81	1113.58	1550.26
sp|P54775|PRS6B_MOUSE	Psmc4	26S proteasome regulatory subunit 6B OS=Mus musculus OX=10090 GN=Psmc4 PE=1 SV=2	397	10	C	UR	2198.37	1952.05	1387.98	2176.84	1650.72	1772.2	1450.06	2190.17	2227.44	2187.37	2060.51
sp|Q64324|STXB2_MOUSE	Stxbp2	Syntaxin-binding protein 2 OS=Mus musculus OX=10090 GN=Stxbp2 PE=1 SV=1	398	8	C	UR	1365.91	1135.02	375.921	1079.13	1713.6	1655.21	406.052	1981.75	1365.59	1470.89	1796.56
sp|Q60770|STXB3_MOUSE	Stxbp3	Syntaxin-binding protein 3 OS=Mus musculus OX=10090 GN=Stxbp3 PE=1 SV=1	398	5	C	UR	808.692	566.289	2389.53	746	424.14	589.299	3266.8	516.566	585.68	656.816	716.992
sp|P84089|ERH_MOUSE	Erh	Enhancer of rudimentary homolog OS=Mus musculus OX=10090 GN=Erh PE=1 SV=1	399	8	C	UR	1644.73	688.056	210.372	1506.17	1654.87	1158.48	200.199	1924.63	1264.13	1457.79	1247.66
sp|Q9JLI6|SCLY_MOUSE	Scly	Selenocysteine lyase OS=Mus musculus OX=10090 GN=Scly PE=1 SV=1	400	1	C	UR	118.993	126.39	219.154	123.85	191.722	165.215	242.466	171.988	143.081	156.277	173.087
sp|Q8BJS4|SUN2_MOUSE	Sun2	SUN domain-containing protein 2 OS=Mus musculus OX=10090 GN=Sun2 PE=1 SV=3	401	4	C	UR	402.506	308.267	228.073	512.221	347.964	643.909	155.906	361.599	686.189	837.364	420.003
sp|G5E829|AT2B1_MOUSE	Atp2b1	Plasma membrane calcium-transporting ATPase 1 OS=Mus musculus OX=10090 GN=Atp2b1 PE=1 SV=1	402	19	C	UR	1996.4	1890.33	2153.12	2991.3	1503.46	2469.82	1461.24	1772.6	2277.71	2019.38	2064.07
tr|E9Q828|E9Q828_MOUSE	Atp2b4	Calcium-transporting ATPase OS=Mus musculus OX=10090 GN=Atp2b4 PE=1 SV=1	402	8	C	UR	247.521	234.612	778.395	383.715	196.661	3614.04	472.695	285.65	718.027	991.091	223.166
sp|Q6ZWQ0|SYNE2_MOUSE	Syne2	Nesprin-2 OS=Mus musculus OX=10090 GN=Syne2 PE=1 SV=2	403	12	C	UR	1288.31	792.024	620.336	1213.29	1300.51	1621.67	421.846	1385.9	1452.77	1575.82	1270.1
sp|Q08943-2|SSRP1_MOUSE	Ssrp1	Isoform 2 of FACT complex subunit SSRP1 OS=Mus musculus OX=10090 GN=Ssrp1	404	8	C	UR	1613.22	2030.6	774.392	2076.13	1411.86	1802.11	852.246	1842.93	1831.73	1711.37	1590.91
sp|Q62318|TIF1B_MOUSE	Trim28	Transcription intermediary factor 1-beta OS=Mus musculus OX=10090 GN=Trim28 PE=1 SV=3	405	8	C	UR	1254.31	1182.96	1355.14	1549.24	793.171	1691.04	1182.27	1283.91	1744.02	1220.76	1003.06
sp|Q3T9X0|GTR9_MOUSE	Slc2a9	Solute carrier family 2, facilitated glucose transporter member 9 OS=Mus musculus OX=10090 GN=Slc2a9 PE=1 SV=1	406	2	C	UR	131.19	64.1182	95.8718	112.312	65.8489	59.6382	36.8026	75.9272	56.7982	72.3565	61.6091
sp|P19783|COX41_MOUSE	Cox4i1	Cytochrome c oxidase subunit 4 isoform 1, mitochondrial OS=Mus musculus OX=10090 GN=Cox4i1 PE=1 SV=2	407	12	C	UR	1617.72	1311.67	432.276	1544.68	1299.39	1230.28	346.51	1055.91	832.254	1116.06	1436.95
sp|Q99PV0|PRP8_MOUSE	Prpf8	Pre-mRNA-processing-splicing factor 8 OS=Mus musculus OX=10090 GN=Prpf8 PE=1 SV=2	408	21	C	UR	3406.81	3324.61	1607.12	4083.84	2160.4	3960.59	1571.88	3808.25	3643.47	3495.72	3342.03
sp|Q8K2G4|BBS7_MOUSE	Bbs7	Bardet-Biedl syndrome 7 protein homolog OS=Mus musculus OX=10090 GN=Bbs7 PE=1 SV=1	409	1	C	UR	23.7696	31.9015	88.4721	27.6329	26.9504	30.4365	92.6476	17.4238	29.9968	22.5309	16.6969
sp|O88310|ITL1A_MOUSE	Itln1	Intelectin-1a OS=Mus musculus OX=10090 GN=Itln1 PE=1 SV=1	410	4	C	UR	240.269	200.18	134.233	181.111	144.425	75.1176	127.59	136.483	139.521	87.9501	184.588
sp|Q9JLB4|CUBN_MOUSE	Cubn	Cubilin OS=Mus musculus OX=10090 GN=Cubn PE=1 SV=3	411	9	C	UR	546.032	461.811	833.512	397.14	355.528	271.621	769.908	271.014	288.845	279.087	275.006
sp|Q8R1G6|PDLI2_MOUSE	Pdlim2	PDZ and LIM domain protein 2 OS=Mus musculus OX=10090 GN=Pdlim2 PE=1 SV=1	412	6	C	UR	1137.2	1141.06	433.815	906.94	683.533	757.213	421.553	853.845	845.59	825.393	967.712
sp|Q9QXS1-3|PLEC_MOUSE	Plec	Isoform PLEC-1A of Plectin OS=Mus musculus OX=10090 GN=Plec	413	25	C	UR	5555.8	4015.93	788.499	4485.96	3987.49	2932.05	632.012	6506.6	6611.3	6671.33	8082.71
sp|Q8R0W0|EPIPL_MOUSE	Eppk1	Epiplakin OS=Mus musculus OX=10090 GN=Eppk1 PE=1 SV=2	413	21	C	UR	5583.14	4801.71	407.083	5073.72	5396.06	3494.64	435.38	4873.69	3734.9	4247.39	5649.61
tr|A0A3B2W864|A0A3B2W864_MOUSE	Gm49804	Predicted gene, 49804 OS=Mus musculus OX=10090 GN=Gm49804 PE=4 SV=1	413	5	C	UR	1063.93	2208.17	403.36	1736.9	2462.02	986.402	641.588	1792.96	1899.73	1440.03	1766.87
sp|O88428|PAPS2_MOUSE	Papss2	Bifunctional 3'-phosphoadenosine 5'-phosphosulfate synthase 2 OS=Mus musculus OX=10090 GN=Papss2 PE=1 SV=2	414	17	C	UR	5736.18	4784.18	593.993	4254.39	4748.24	2836.12	772.131	3456.49	2859.83	3486.53	3185.11
sp|Q60967|PAPS1_MOUSE	Papss1	Bifunctional 3'-phosphoadenosine 5'-phosphosulfate synthase 1 OS=Mus musculus OX=10090 GN=Papss1 PE=1 SV=1	414	8	C	UR	1181.25	858.301	259.305	816.915	1254.58	885.277	356.646	881.058	767.864	811.869	792.152
sp|P97765|WBP2_MOUSE	Wbp2	WW domain-binding protein 2 OS=Mus musculus OX=10090 GN=Wbp2 PE=1 SV=1	415	2	C	UR	157.012	167.903	63.5152	117.332	189.023	138.472	98.3832	171.487	155.283	163.871	191.71
sp|Q9D7A8|ARMC1_MOUSE	Armc1	Armadillo repeat-containing protein 1 OS=Mus musculus OX=10090 GN=Armc1 PE=1 SV=1	416	3	C	UR	408.495	313.154	110.761	386.386	443.175	497.172	130.028	358.718	518.915	433.873	406.667
sp|Q8JZZ7-2|AGRL2_MOUSE	Adgrl2	Isoform 2 of Adhesion G protein-coupled receptor L2 OS=Mus musculus OX=10090 GN=Adgrl2	417	6	C	UR	367.06	422.069	238.307	468.28	765.095	359.378	237.316	508.933	402.925	409.361	458.74
sp|Q8R3F5|FABD_MOUSE	Mcat	Malonyl-CoA-acyl carrier protein transacylase, mitochondrial OS=Mus musculus OX=10090 GN=Mcat PE=1 SV=3	418	4	C	UR	201.134	260.434	43.1542	146.441	192.013	188.876	53.6405	236.09	170.146	175.122	209.556
sp|P98192|GNPAT_MOUSE	Gnpat	Dihydroxyacetone phosphate acyltransferase OS=Mus musculus OX=10090 GN=Gnpat PE=1 SV=1	419	3	C	UR	280.55	263.289	419.958	321.891	137.479	383.913	176.323	169.013	276.047	251.152	205.06
sp|Q8K2Q0|COMD9_MOUSE	Commd9	COMM domain-containing protein 9 OS=Mus musculus OX=10090 GN=Commd9 PE=1 SV=3	420	2	C	UR	59.7345	62.6365	65.2705	72.7529	101.94	106.913	38.7424	108.038	74.9802	81.3248	100.62
sp|Q80ZS3|RT26_MOUSE	Mrps26	28S ribosomal protein S26, mitochondrial OS=Mus musculus OX=10090 GN=Mrps26 PE=1 SV=1	421	5	C	UR	372.947	501.457	178.241	542.051	442.437	305.471	48.421	422.905	336.68	387.623	452.732
sp|Q9QZH3|PPIE_MOUSE	Ppie	Peptidyl-prolyl cis-trans isomerase E OS=Mus musculus OX=10090 GN=Ppie PE=1 SV=2	422	10	C	UR	1329.12	1504.17	1848.15	1463.68	1808.04	1060.72	1145.07	1741.26	1116	1540.99	1473.16
sp|Q99KR7|PPIF_MOUSE	Ppif	Peptidyl-prolyl cis-trans isomerase F, mitochondrial OS=Mus musculus OX=10090 GN=Ppif PE=1 SV=1	422	11	C	UR	1783.33	1991.63	1023.31	1877.32	2681.35	1063.06	535.301	1423.99	986.446	1260.45	1364.69
sp|P05202|AATM_MOUSE	Got2	Aspartate aminotransferase, mitochondrial OS=Mus musculus OX=10090 GN=Got2 PE=1 SV=1	423	11	C	UR	972.173	1512.36	2513.22	1251.28	1331.37	1024.29	4675.42	1239.68	646.355	1036.98	929.89
tr|E9QAH1|E9QAH1_MOUSE	Golgb1	Golgi autoantigen, golgin subfamily b, macrogolgin 1 OS=Mus musculus OX=10090 GN=Golgb1 PE=1 SV=1	424	27	C	UR	3800.54	2583.72	908.348	3132.93	4433.63	3491.89	762.438	4476.44	4012.73	4586.38	4209.9
sp|Q61081|CDC37_MOUSE	Cdc37	Hsp90 co-chaperone Cdc37 OS=Mus musculus OX=10090 GN=Cdc37 PE=1 SV=1	425	4	C	UR	522.073	986.707	324.098	868.245	828.871	706.948	163.717	1222.71	1342.78	1261.72	908.999
tr|A0A286YCV9|A0A286YCV9_MOUSE	Kif13b	Kinesin family member 13B OS=Mus musculus OX=10090 GN=Kif13b PE=1 SV=1	426	11	C	UR	1181.26	733.662	656.298	1041.4	847.053	1277.65	440.399	1146.09	1195.88	1185.88	1321.99
sp|O35071|KIF1C_MOUSE	Kif1c	Kinesin-like protein KIF1C OS=Mus musculus OX=10090 GN=Kif1c PE=1 SV=2	426	2	C	UR	149.668	102.517	46.8576	120	121.146	166.215	63.1123	158.007	176.656	171.283	185.943
sp|Q9EQW7|KI13A_MOUSE	Kif13a	Kinesin-like protein KIF13A OS=Mus musculus OX=10090 GN=Kif13a PE=1 SV=1	426	4	C	UR	228.176	155.297	112.526	209.387	202.026	257.073	77.5612	249.434	243.785	259.05	262.905
sp|Q60575|KIF1B_MOUSE	Kif1b	Kinesin-like protein KIF1B OS=Mus musculus OX=10090 GN=Kif1b PE=1 SV=2	426	4	C	UR	403.933	263.84	252.908	332.952	360.063	413.948	258.474	505.903	377.094	440.197	504.989
sp|Q8VCG4|CO8G_MOUSE	C8g	Complement component C8 gamma chain OS=Mus musculus OX=10090 GN=C8g PE=1 SV=1	427	2	C	UR	118.669	162.816	86.2577	124.053	105.376	88.8327	91.1561	113.243	128.276	140.839	146.49
tr|F8VQA4|F8VQA4_MOUSE	Pam	Peptidyl-glycine alpha-amidating monooxygenase OS=Mus musculus OX=10090 GN=Pam PE=1 SV=1	428	4	C	UR	601.963	698.13	1837.92	562.948	589.931	590.88	3655.82	401.686	654.606	510.014	614.519
sp|Q61233|PLSL_MOUSE	Lcp1	Plastin-2 OS=Mus musculus OX=10090 GN=Lcp1 PE=1 SV=4	429	18	C	UR	1588.54	1815.3	1609.85	1914.2	2620.59	2324.07	3131.19	3121.62	3874.42	4047.56	3028.49
sp|Q3V0K9|PLSI_MOUSE	Pls1	Plastin-1 OS=Mus musculus OX=10090 GN=Pls1 PE=1 SV=1	429	17	C	UR	3039.69	5658.18	1113.97	2598.57	3387.58	1664.15	1829.85	2258.71	2137.59	2062.26	3097.78
sp|Q99K51|PLST_MOUSE	Pls3	Plastin-3 OS=Mus musculus OX=10090 GN=Pls3 PE=1 SV=3	429	15	C	UR	2691.15	3771.87	2821.84	2710.49	3269.69	2253.14	4512.98	2668.59	3052.02	2513.37	3007.42
sp|P06801|MAOX_MOUSE	Me1	NADP-dependent malic enzyme OS=Mus musculus OX=10090 GN=Me1 PE=1 SV=2	430	6	C	UR	545.274	650.909	931.631	505.293	623.067	620.45	1051.93	533.434	723.129	639.935	485.049
sp|Q99NH2|PARD3_MOUSE	Pard3	Partitioning defective 3 homolog OS=Mus musculus OX=10090 GN=Pard3 PE=1 SV=2	431	2	C	UR	121.446	164.527	24.125	131.405	137.032	104.93	24.4845	148.688	133.243	158.744	164.085
sp|Q61147|CERU_MOUSE	Cp	Ceruloplasmin OS=Mus musculus OX=10090 GN=Cp PE=1 SV=2	432	19	C	UR	3608.72	4117.35	2472.11	3148.7	2880.24	2050.8	2534.54	2628.78	3933.48	4403.37	3739.75
sp|Q8R4U7|LUZP1_MOUSE	Luzp1	Leucine zipper protein 1 OS=Mus musculus OX=10090 GN=Luzp1 PE=1 SV=2	433	3	C	UR	145.765	144.172	91.1782	142.458	160.458	116.18	60.4489	187.618	183.733	187.77	208.419
sp|P26645|MARCS_MOUSE	Marcks	Myristoylated alanine-rich C-kinase substrate OS=Mus musculus OX=10090 GN=Marcks PE=1 SV=2	434	7	C	UR	325.892	687.478	756.193	764.018	1093.14	669.575	952.92	612.729	1133.23	1235.09	1032.65
sp|P48428|TBCA_MOUSE	Tbca	Tubulin-specific chaperone A OS=Mus musculus OX=10090 GN=Tbca PE=1 SV=3	435	2	C	UR	42.9447	146.526	68.7099	72.5269	148.032	45.6955	23.8631	425.355	398.534	528.067	572.302
sp|Q60604|ADSV_MOUSE	Scin	Adseverin OS=Mus musculus OX=10090 GN=Scin PE=1 SV=3	436	18	C	UR	4111.23	3734.84	1667.01	3524.01	6845.36	2156.39	1303.46	3010.57	2456.86	2299.75	4428.16
tr|D3YZZ5|D3YZZ5_MOUSE	Tmed7	Transmembrane p24-trafficking protein 7 OS=Mus musculus OX=10090 GN=Tmed7 PE=1 SV=1	437	5	C	UR	567.07	590.524	292.237	562.302	611.787	454.481	262.533	454.952	389.345	340.475	530.867
tr|D6RIL2|D6RIL2_MOUSE	3110040N11Rik	RIKEN cDNA 3110040N11 gene OS=Mus musculus OX=10090 GN=3110040N11Rik PE=4 SV=1	438	1	C	UR	39.6293	49.3448	18.3433	45.9987	23.8647	27.3803	12.0183	27.7556	21.6045	21.6113	19.7395
tr|E9PUQ7|E9PUQ7_MOUSE	Trmt2a	tRNA (uracil-5-)-methyltransferase homolog A OS=Mus musculus OX=10090 GN=Trmt2a PE=1 SV=1	439	1	C	UR	76.7371	64.8129	69.6625	91.9779	50.2122	107.916	72.1323	98.1586	111.624	78.9659	77.676
sp|P17918|PCNA_MOUSE	Pcna	Proliferating cell nuclear antigen OS=Mus musculus OX=10090 GN=Pcna PE=1 SV=2	440	7	C	UR	1248.57	1214.78	222.796	1771.47	1618.62	1328.08	268.031	1759.68	2332.09	1931.01	1634.09
sp|P70335|ROCK1_MOUSE	Rock1	Rho-associated protein kinase 1 OS=Mus musculus OX=10090 GN=Rock1 PE=1 SV=1	441	16	C	UR	1942.4	1692.01	900.973	1512.37	2682.61	1794.15	786.643	2535.86	2263.9	2428.52	2434.32
tr|A0A1Y7VMN0|A0A1Y7VMN0_MOUSE	Rock2	Rho-associated protein kinase 2 (Fragment) OS=Mus musculus OX=10090 GN=Rock2 PE=1 SV=1	441	16	C	UR	2203.25	1378.25	444.001	1205.8	1562.35	1515.16	363.166	1690.06	1977.31	1852.43	1923.54
sp|Q5EBP3|ARMC5_MOUSE	Armc5	Armadillo repeat-containing protein 5 OS=Mus musculus OX=10090 GN=Armc5 PE=2 SV=1	442	1	C	UR	3.26013	2.95071	6.55507	3.6024	12.597	3.26963	6.66621	90.3415	48.8561	97.1707	36.7368
sp|P35564|CALX_MOUSE	Canx	Calnexin OS=Mus musculus OX=10090 GN=Canx PE=1 SV=1	443	22	C	UR	3317.81	2888.51	4379.66	4683.31	1714.58	4174.31	4993.4	2966.55	3679.2	3643.04	2502.96
sp|P53810|PIPNA_MOUSE	Pitpna	Phosphatidylinositol transfer protein alpha isoform OS=Mus musculus OX=10090 GN=Pitpna PE=1 SV=2	444	9	C	UR	2611.56	2580.06	2547.56	2411.46	2514.12	1941.79	3510.03	2337.84	2088.09	2142.67	2559.56
sp|Q9CU62|SMC1A_MOUSE	Smc1a	Structural maintenance of chromosomes protein 1A OS=Mus musculus OX=10090 GN=Smc1a PE=1 SV=4	445	20	C	UR	4330.7	4624.27	549.266	4693.35	4695.26	4507.83	641.151	5358.21	4894.31	4881.26	4630.27
sp|Q62418|DBNL_MOUSE	Dbnl	Drebrin-like protein OS=Mus musculus OX=10090 GN=Dbnl PE=1 SV=2	446	4	C	UR	158.723	272.892	43.4513	139.855	176.153	137.463	42.1522	324.592	324.093	369.584	342.346
sp|Q3TBD2|HMHA1_MOUSE	Arhgap45	Rho GTPase-activating protein 45 OS=Mus musculus OX=10090 GN=Arhgap45 PE=1 SV=2	447	3	C	UR	337.067	242.811	251.106	490.088	347.364	858.285	260.112	646.029	883.668	1008.82	540.166
sp|Q9ERA6|TFP11_MOUSE	Tfip11	Tuftelin-interacting protein 11 OS=Mus musculus OX=10090 GN=Tfip11 PE=1 SV=1	448	3	C	UR	576.487	527.605	244.429	669.124	455.896	676.083	281.46	622.974	659.095	677.952	488.078
sp|Q9CXW4|RL11_MOUSE	Rpl11	60S ribosomal protein L11 OS=Mus musculus OX=10090 GN=Rpl11 PE=1 SV=4	449	5	C	UR	472.035	609.109	143.793	522.842	497.212	416.054	158.825	512.02	522.837	412.647	563.315
sp|P25976|UBF1_MOUSE	Ubtf	Nucleolar transcription factor 1 OS=Mus musculus OX=10090 GN=Ubtf PE=1 SV=1	450	10	C	UR	1299.57	1454.97	723.815	1344.46	1381.29	1325.66	892.723	1925.01	1820	1896.66	1743.51
sp|Q9Z0R4|ITSN1_MOUSE	Itsn1	Intersectin-1 OS=Mus musculus OX=10090 GN=Itsn1 PE=1 SV=2	451	4	C	UR	354.239	330.213	259.548	278.818	297.027	340.555	182.436	282.843	341.369	363.166	283.697
sp|Q9Z0R6|ITSN2_MOUSE	Itsn2	Intersectin-2 OS=Mus musculus OX=10090 GN=Itsn2 PE=1 SV=2	451	4	C	UR	353.68	305.219	138.029	287.858	276.034	339.195	115.434	390.112	439.531	458.621	455.991
sp|Q91WC0|SETD3_MOUSE	Setd3	Actin-histidine N-methyltransferase OS=Mus musculus OX=10090 GN=Setd3 PE=1 SV=1	452	6	C	UR	472.977	562.41	154.783	506.004	529.049	439.528	124.254	582.309	541.639	451.089	527.781
sp|A2ACP1|TT39A_MOUSE	Ttc39a	Tetratricopeptide repeat protein 39A OS=Mus musculus OX=10090 GN=Ttc39a PE=2 SV=1	453	5	C	UR	294.246	228.124	492.837	316.579	276.508	373.669	380.537	299.096	279.121	250.885	286.583
sp|Q3U0K8|OGFD1_MOUSE	Ogfod1	Prolyl 3-hydroxylase OGFOD1 OS=Mus musculus OX=10090 GN=Ogfod1 PE=1 SV=1	454	3	C	UR	156.878	195.696	89.6456	142.635	235.666	112.429	174.733	181.781	157.046	150.832	166.79
sp|Q3UP24|NLRC4_MOUSE	Nlrc4	NLR family CARD domain-containing protein 4 OS=Mus musculus OX=10090 GN=Nlrc4 PE=1 SV=1	455	12	C	UR	1779.69	1342.56	1488.16	1806.38	1238.32	1852.04	928.434	1431.23	1664.66	1538.41	1504.63
sp|Q7TQG1|PKHA6_MOUSE	Plekha6	Pleckstrin homology domain-containing family A member 6 OS=Mus musculus OX=10090 GN=Plekha6 PE=1 SV=1	456	4	C	UR	130.275	135.152	365.376	129.328	110.535	102.564	388.342	143.853	134.112	139.564	160.134
tr|Q8R5L1|Q8R5L1_MOUSE	C1qbp	Complement component 1 Q subcomponent-binding protein, mitochondrial OS=Mus musculus OX=10090 GN=C1qbp PE=1 SV=1	457	5	C	UR	237.596	279.02	90.3395	282.557	303.227	173.625	45.8496	284.836	215.981	243.897	266.965
sp|Q9JIX8|ACINU_MOUSE	Acin1	Apoptotic chromatin condensation inducer in the nucleus OS=Mus musculus OX=10090 GN=Acin1 PE=1 SV=3	458	2	C	UR	208.098	54.2688	265.84	205.21	349.123	209.812	132.564	236.33	381.904	329.628	196.369
sp|P23116|EIF3A_MOUSE	Eif3a	Eukaryotic translation initiation factor 3 subunit A OS=Mus musculus OX=10090 GN=Eif3a PE=1 SV=5	459	17	C	UR	2539.72	1668.59	1410.04	2481.14	2090.34	3101.84	1263.69	3123.22	3192.39	2876.61	2573.61
sp|Q04750|TOP1_MOUSE	Top1	DNA topoisomerase 1 OS=Mus musculus OX=10090 GN=Top1 PE=1 SV=2	460	12	C	UR	952.434	1687.76	176.988	1029.78	1541.76	751.051	139.913	1689.87	1550.03	1205.28	1615.09
sp|Q8CG47|SMC4_MOUSE	Smc4	Structural maintenance of chromosomes protein 4 OS=Mus musculus OX=10090 GN=Smc4 PE=1 SV=1	461	13	C	UR	1835.85	2405.59	818.461	2508.53	1838.26	1508.01	806.055	2111.52	2881.94	2099.65	1956.83
sp|Q8BRN9|C2D1B_MOUSE	Cc2d1b	Coiled-coil and C2 domain-containing protein 1B OS=Mus musculus OX=10090 GN=Cc2d1b PE=1 SV=1	462	1	C	UR	67.4617	48.6843	37.8105	76.3085	64.162	93.4203	38.4226	77.1826	86.9818	86.7708	63.2156
sp|Q99PT1|GDIR1_MOUSE	Arhgdia	Rho GDP-dissociation inhibitor 1 OS=Mus musculus OX=10090 GN=Arhgdia PE=1 SV=3	463	12	C	UR	994.651	1207.23	2821.94	876.605	1195.32	748.846	4080.56	1106.75	907.699	1043.31	1131.22
sp|Q9D753|EXOS8_MOUSE	Exosc8	Exosome complex component RRP43 OS=Mus musculus OX=10090 GN=Exosc8 PE=1 SV=1	464	3	C	UR	186.144	211.45	44.1161	182.635	319.352	174.931	46.9096	259.323	214.73	228.758	258.396
sp|P41317|MBL2_MOUSE	Mbl2	Mannose-binding protein C OS=Mus musculus OX=10090 GN=Mbl2 PE=1 SV=2	465	2	C	UR	112.883	164.926	625.081	182.167	115.121	91.3875	247.366	83.7816	115.28	132.348	139.622
sp|P39039|MBL1_MOUSE	Mbl1	Mannose-binding protein A OS=Mus musculus OX=10090 GN=Mbl1 PE=1 SV=1	465	2	C	UR	45.5411	76.6613	189.618	97.697	53.6445	37.2765	65.3292	37.4481	51.1626	63.9171	62.137
sp|Q9JMG2|C1GLC_MOUSE	C1galt1c1	C1GALT1-specific chaperone 1 OS=Mus musculus OX=10090 GN=C1galt1c1 PE=2 SV=1	466	8	C	UR	2182.53	1254.83	2304.85	2062.31	1140.93	2193.18	1057.62	1000.76	911.781	964.854	807.29
sp|Q9DBB8|DHDH_MOUSE	Dhdh	Trans-1,2-dihydrobenzene-1,2-diol dehydrogenase OS=Mus musculus OX=10090 GN=Dhdh PE=1 SV=1	467	4	C	UR	304.736	314.143	210.716	369.442	521.506	716.022	185.162	489.956	710.858	744.135	381.073
sp|Q07813|BAX_MOUSE	Bax	Apoptosis regulator BAX OS=Mus musculus OX=10090 GN=Bax PE=1 SV=1	467	7	C	UR	279.746	305.117	231.74	340.096	425.853	403.455	321.88	554.788	1032.08	923.042	719.711
sp|Q9JHQ5|LZTL1_MOUSE	Lztfl1	Leucine zipper transcription factor-like protein 1 OS=Mus musculus OX=10090 GN=Lztfl1 PE=1 SV=1	468	2	C	UR	159.779	72.274	120.683	89.9337	309.966	231.988	66.8177	401.823	301.271	453.209	376.427
sp|P59017|B2L13_MOUSE	Bcl2l13	Bcl-2-like protein 13 OS=Mus musculus OX=10090 GN=Bcl2l13 PE=1 SV=2	469	2	C	UR	38.7892	30.467	52.188	56.4423	61.3184	40.3452	29.6627	141.795	71.7282	163.11	81.6153
sp|Q61646|HPT_MOUSE	Hp	Haptoglobin OS=Mus musculus OX=10090 GN=Hp PE=1 SV=1	470	14	C	UR	822.761	1712.8	1113.69	875.191	553.48	1006.06	1863.93	1780.11	2304.03	2866.58	2069.1
sp|Q8VCZ2|TM45B_MOUSE	Tmem45b	Transmembrane protein 45B OS=Mus musculus OX=10090 GN=Tmem45b PE=1 SV=1	471	4	C	UR	720.095	567.153	3844.29	810.506	187.743	1205.69	2197.39	468.09	590.776	524.463	489.821
sp|Q8K019|BCLF1_MOUSE	Bclaf1	Bcl-2-associated transcription factor 1 OS=Mus musculus OX=10090 GN=Bclaf1 PE=1 SV=2	472	1	C	UR	13.9395	4.12697	2.74793	15.6043	24.7206	4.93602	4.32092	55.4811	30.1272	44.5577	22.0599
sp|Q569Z5|DDX46_MOUSE	Ddx46	Probable ATP-dependent RNA helicase DDX46 OS=Mus musculus OX=10090 GN=Ddx46 PE=1 SV=2	473	5	C	UR	295.873	295.557	167.446	293.65	170.345	266.536	198.137	229.54	290.895	289.709	245.366
sp|P04186|CFAB_MOUSE	Cfb	Complement factor B OS=Mus musculus OX=10090 GN=Cfb PE=1 SV=2	474	12	C	UR	1682.74	1749.17	2238.53	1629.52	1460.88	1013.43	3516.91	1684.38	1726.49	2068.33	1800.83
sp|Q8BK75|ELP6_MOUSE	Elp6	Elongator complex protein 6 OS=Mus musculus OX=10090 GN=Elp6 PE=2 SV=1	475	2	C	UR	137.234	124.706	110.975	137.782	141.066	137.785	122.164	113.339	112.859	87.2468	116.293
sp|Q5ND34|WDR81_MOUSE	Wdr81	WD repeat-containing protein 81 OS=Mus musculus OX=10090 GN=Wdr81 PE=1 SV=2	476	3	C	UR	118.544	108.35	95.9458	137.971	112.942	138.575	95.7459	140.594	157.973	145.712	122.91
sp|Q6GQT9|NOMO1_MOUSE	Nomo1	Nodal modulator 1 OS=Mus musculus OX=10090 GN=Nomo1 PE=1 SV=1	477	14	C	UR	3071.17	2411.02	3900.6	3386.78	2033.55	2799.24	2964.04	2552.26	2546.54	2554.05	2868.32
sp|Q9JHR7|IDE_MOUSE	Ide	Insulin-degrading enzyme OS=Mus musculus OX=10090 GN=Ide PE=1 SV=1	478	17	C	UR	1735.36	1338.97	790.828	1398	1980.83	2674.65	1574.15	1663.34	2168.19	1857.89	2464.82
sp|O54774|AP3D1_MOUSE	Ap3d1	AP-3 complex subunit delta-1 OS=Mus musculus OX=10090 GN=Ap3d1 PE=1 SV=1	479	11	C	UR	1565.72	1716.78	938.715	1553.81	1720.85	1621.2	1004.81	1474.35	1627.09	1334.44	1686.31
sp|Q00915|RET1_MOUSE	Rbp1	Retinol-binding protein 1 OS=Mus musculus OX=10090 GN=Rbp1 PE=1 SV=2	480	5	C	UR	999.424	1235.33	463.753	922.189	944.816	795.268	438.877	984.999	1236.35	1553.79	1245.25
sp|Q60676|PPP5_MOUSE	Ppp5c	Serine/threonine-protein phosphatase 5 OS=Mus musculus OX=10090 GN=Ppp5c PE=1 SV=3	481	10	C	UR	821.901	1047.08	1498.04	851.409	1098.13	871.055	1279.76	1191.64	918.849	1105.23	1062.3
sp|P37889|FBLN2_MOUSE	Fbln2	Fibulin-2 OS=Mus musculus OX=10090 GN=Fbln2 PE=1 SV=2	482	4	C	UR	175.095	180.061	101.741	147.831	109.02	275.308	40.1541	161.09	208.468	321.734	90.627
sp|P14733|LMNB1_MOUSE	Lmnb1	Lamin-B1 OS=Mus musculus OX=10090 GN=Lmnb1 PE=1 SV=3	483	18	C	UR	1118.06	831.172	1194.16	883.932	2322.99	802.273	1724.98	3718.04	2283.51	4889.61	3929.25
sp|P21619|LMNB2_MOUSE	Lmnb2	Lamin-B2 OS=Mus musculus OX=10090 GN=Lmnb2 PE=1 SV=2	483	13	C	UR	1312.45	806.346	187.397	764.748	2565.36	861.837	239.914	2530.97	1285.12	2568.56	2371.59
sp|Q8CI51|PDLI5_MOUSE	Pdlim5	PDZ and LIM domain protein 5 OS=Mus musculus OX=10090 GN=Pdlim5 PE=1 SV=4	484	4	C	UR	425.725	342.053	402.755	526.742	506.83	531.853	222.434	517.999	839.961	764.934	763.346
sp|Q9ERU9|RBP2_MOUSE	Ranbp2	E3 SUMO-protein ligase RanBP2 OS=Mus musculus OX=10090 GN=Ranbp2 PE=1 SV=2	485	18	C	UR	3193.79	2256.24	1651.07	3259.64	2314.8	3709.8	1513.97	3532.03	4528.44	4282.68	3084.29
sp|Q3U4G3|XXLT1_MOUSE	Xxylt1	Xyloside xylosyltransferase 1 OS=Mus musculus OX=10090 GN=Xxylt1 PE=1 SV=2	486	3	C	UR	387.352	364.967	1091.66	485.63	317.803	364.817	1018.79	243.437	278.58	243.106	273.101
sp|Q64518|AT2A3_MOUSE	Atp2a3	Sarcoplasmic/endoplasmic reticulum calcium ATPase 3 OS=Mus musculus OX=10090 GN=Atp2a3 PE=1 SV=3	488	14	C	UR	2059.5	1576.66	2169.9	2688.48	576.518	3007.01	2199.53	978.136	2017.23	1475.55	1033.98
sp|Q8R429|AT2A1_MOUSE	Atp2a1	Sarcoplasmic/endoplasmic reticulum calcium ATPase 1 OS=Mus musculus OX=10090 GN=Atp2a1 PE=1 SV=1	488	1	C	UR	28.9876	11.699	12.5185	107.114	2.86349	6.68758	6.21865	15.1906	4.27785	14.3968	8.1419
sp|O55143|AT2A2_MOUSE	Atp2a2	Sarcoplasmic/endoplasmic reticulum calcium ATPase 2 OS=Mus musculus OX=10090 GN=Atp2a2 PE=1 SV=2	488	20	C	UR	3228.64	2342.47	3098.77	3675.78	693.104	4254.31	3504.13	1492.88	3170.24	2394.73	1652.71
sp|Q61739-2|ITA6_MOUSE	Itga6	Isoform Alpha-6X1A of Integrin alpha-6 OS=Mus musculus OX=10090 GN=Itga6	489	1	C	UR	651.125	523.201	31.6595	1121.96	710.346	1002.81	34.0947	1117.77	1305.66	1081.86	1264.83
sp|Q61739|ITA6_MOUSE	Itga6	Integrin alpha-6 OS=Mus musculus OX=10090 GN=Itga6 PE=1 SV=3	489	25	C	UR	3908.79	4076.64	5831.28	4922	3234.99	3307.46	9308.57	3421.56	3459.08	2790.57	4453.58
sp|Q9CQ80|VPS25_MOUSE	Vps25	Vacuolar protein-sorting-associated protein 25 OS=Mus musculus OX=10090 GN=Vps25 PE=1 SV=1	490	5	C	UR	430.507	253.525	100.306	266.069	615.312	456.62	73.6341	363.552	285.899	337.751	409.942
sp|O35551-6|RABE1_MOUSE	Rabep1	Isoform 6 of Rab GTPase-binding effector protein 1 OS=Mus musculus OX=10090 GN=Rabep1	491	3	C	UR	287.174	160.09	111.351	226.498	235.779	327.836	103.809	264.964	291.573	325.517	218.537
tr|E9PWQ3|E9PWQ3_MOUSE	Col6a3	Collagen, type VI, alpha 3 OS=Mus musculus OX=10090 GN=Col6a3 PE=1 SV=2	492	27	C	UR	1606.24	2019.11	5085.17	2147.2	943.134	7566.15	6295.47	926.097	4089.58	2595.7	930.363
tr|J3QQ16|J3QQ16_MOUSE	Col6a3	Collagen, type VI, alpha 3 OS=Mus musculus OX=10090 GN=Col6a3 PE=1 SV=1	492	3	C	UR	46.4795	73.5186	166.048	85.333	31.4728	473.523	272.077	29.4542	171.334	148.11	25.5915
sp|Q05BC3-3|EMAL1_MOUSE	Eml1	Isoform 3 of Echinoderm microtubule-associated protein-like 1 OS=Mus musculus OX=10090 GN=Eml1	493	3	C	UR	209.126	249.016	154.144	259.351	297.722	757.969	517.072	190.516	296.095	346.897	196.679
tr|A0A1L1SQU7|A0A1L1SQU7_MOUSE	Fat1	FAT atypical cadherin 1 OS=Mus musculus OX=10090 GN=Fat1 PE=1 SV=1	494	14	C	UR	2691.52	3224.5	1043.87	3303.56	3116.38	1359.47	471.017	1554.93	1875.55	1898.6	2821.55
sp|Q91VC9|GHITM_MOUSE	Ghitm	Growth hormone-inducible transmembrane protein OS=Mus musculus OX=10090 GN=Ghitm PE=1 SV=1	495	3	C	UR	65.3892	78.9812	669.159	59.3262	42.3449	36.9894	424.408	42.0153	62.8337	65.6088	49.6542
sp|Q921H8|THIKA_MOUSE	Acaa1a	3-ketoacyl-CoA thiolase A, peroxisomal OS=Mus musculus OX=10090 GN=Acaa1a PE=1 SV=1	496	8	C	UR	763.185	623.19	231.635	877.161	347.98	630.807	138.624	415.013	657.707	605.387	487.634
sp|Q8VCH0|THIKB_MOUSE	Acaa1b	3-ketoacyl-CoA thiolase B, peroxisomal OS=Mus musculus OX=10090 GN=Acaa1b PE=1 SV=1	496	1	C	UR	117.941	64.4159	16.6882	114.984	25.0059	30.711	16.7906	18.0385	40.0515	45.4827	30.4145
sp|Q8BHN3|GANAB_MOUSE	Ganab	Neutral alpha-glucosidase AB OS=Mus musculus OX=10090 GN=Ganab PE=1 SV=1	497	18	C	UR	2181.67	1901.29	1065.14	2219.54	2899.86	1441.6	1185.57	2176.25	1809.2	1532.26	2085.04
sp|P52431|DPOD1_MOUSE	Pold1	DNA polymerase delta catalytic subunit OS=Mus musculus OX=10090 GN=Pold1 PE=1 SV=2	498	5	C	UR	446.885	418.648	171.774	465.709	329.788	459.88	144.696	357.209	438.663	361.299	292.88
sp|Q8VIJ6|SFPQ_MOUSE	Sfpq	Splicing factor, proline- and glutamine-rich OS=Mus musculus OX=10090 GN=Sfpq PE=1 SV=1	499	3	C	UR	493.253	464.799	28.0888	405.6	407.109	525.257	64.7928	526.525	641.359	555.025	500.263
sp|Q99K48|NONO_MOUSE	Nono	Non-POU domain-containing octamer-binding protein OS=Mus musculus OX=10090 GN=Nono PE=1 SV=3	499	5	C	UR	618.02	372.13	190.085	678.549	537.902	550.161	133.166	872.794	1070.59	866.747	637.237
sp|Q7TMS5|ABCG2_MOUSE	Abcg2	Broad substrate specificity ATP-binding cassette transporter ABCG2 OS=Mus musculus OX=10090 GN=Abcg2 PE=1 SV=1	500	3	C	UR	346.962	383.385	974.094	400.382	339.192	218.491	443.403	324.97	258.58	264.52	327.576
tr|E9Q6R7|E9Q6R7_MOUSE	Utrn	Utrophin OS=Mus musculus OX=10090 GN=Utrn PE=1 SV=1	501	15	C	UR	915.06	1085.36	548.414	1189.52	1501.81	1753.02	359.499	1642.14	2152.75	2265.83	1438.19
sp|P11531|DMD_MOUSE	Dmd	Dystrophin OS=Mus musculus OX=10090 GN=Dmd PE=1 SV=3	501	10	C	UR	203.898	212.57	243.013	280.607	202.655	1571.21	177.488	224.348	534.656	617.501	176.056
sp|Q62261|SPTB2_MOUSE	Sptbn1	Spectrin beta chain, non-erythrocytic 1 OS=Mus musculus OX=10090 GN=Sptbn1 PE=1 SV=2	502	33	C	UR	6185.83	5678.81	1149	5759.13	5576.6	5650.03	1084.7	5439.21	5621.57	5066.03	6115.86
sp|P15508|SPTB1_MOUSE	Sptb	Spectrin beta chain, erythrocytic OS=Mus musculus OX=10090 GN=Sptb PE=1 SV=4	502	5	C	UR	412.548	291.716	130.318	355.751	1031.6	535.458	77.9951	725.587	1026.07	1095.08	1175.71
sp|Q9QXG4|ACSA_MOUSE	Acss2	Acetyl-coenzyme A synthetase, cytoplasmic OS=Mus musculus OX=10090 GN=Acss2 PE=1 SV=2	503	4	C	UR	396.739	321.991	139.59	410.689	454.677	466.067	107.345	353.848	415.536	390.306	392.264
tr|F7CU63|F7CU63_MOUSE	Acss2	Acetyl-coenzyme A synthetase, cytoplasmic (Fragment) OS=Mus musculus OX=10090 GN=Acss2 PE=1 SV=1	503	1	C	UR	45.3896	49.3919	19.8285	50.9649	52.3413	34.8404	16.4092	57.786	48.434	53.805	47.9248
sp|Q69ZQ1|MYORG_MOUSE	Myorg	Myogenesis-regulating glycosidase OS=Mus musculus OX=10090 GN=Myorg PE=1 SV=2	504	2	C	UR	70.7737	57.8408	374.302	85.8452	44.7766	100.387	415.415	45.2803	51.1246	75.8738	46.4965
sp|Q8BZS9-2|DHX32_MOUSE	Dhx32	Isoform 2 of Putative pre-mRNA-splicing factor ATP-dependent RNA helicase DHX32 OS=Mus musculus OX=10090 GN=Dhx32	505	7	C	UR	1122.35	925.454	954.088	1111.32	826.932	1003.95	288.314	822.44	920.508	785.595	768.976
tr|A0A494BAW1|A0A494BAW1_MOUSE	Duox2	Dual oxidase 2 OS=Mus musculus OX=10090 GN=Duox2 PE=4 SV=1	506	16	C	UR	1807	2392.13	4245.26	2266.47	1094.45	2106.95	3300.63	1754.68	2427.79	1719.73	2839.2
sp|Q62230|SN_MOUSE	Siglec1	Sialoadhesin OS=Mus musculus OX=10090 GN=Siglec1 PE=1 SV=2	507	4	C	UR	233.112	232.653	333.187	248.362	134.786	707.203	258.101	203.34	463.247	525.262	113.817
sp|Q91YI0|ARLY_MOUSE	Asl	Argininosuccinate lyase OS=Mus musculus OX=10090 GN=Asl PE=1 SV=1	508	11	C	UR	1440.76	1413.32	1811	1169.03	2223.7	1319.34	3076.19	1493.59	980.706	1148.19	1468.96
sp|Q9DBG3-2|AP2B1_MOUSE	Ap2b1	Isoform 2 of AP-2 complex subunit beta OS=Mus musculus OX=10090 GN=Ap2b1	509	17	C	UR	3239.35	2970.14	3117.32	2907.87	3440.36	2890.01	3869.37	3085.3	3368.63	2842.17	3366.82
sp|O35643|AP1B1_MOUSE	Ap1b1	AP-1 complex subunit beta-1 OS=Mus musculus OX=10090 GN=Ap1b1 PE=1 SV=2	509	8	C	UR	1165.89	1074.3	3351.37	1116.27	1392.94	1444.54	3135.12	1306.96	1090.6	1256.6	1439.18
sp|O55106|STRN_MOUSE	Strn	Striatin OS=Mus musculus OX=10090 GN=Strn PE=1 SV=2	510	7	C	UR	805.742	713.43	238.294	703.311	693.607	643.882	713.275	626.461	451.417	681.226	748.618
sp|Q9R0E2|PLOD1_MOUSE	Plod1	Procollagen-lysine,2-oxoglutarate 5-dioxygenase 1 OS=Mus musculus OX=10090 GN=Plod1 PE=1 SV=1	512	5	C	UR	513.111	579.991	411.403	440.011	436.288	520.895	250.316	444.296	709.096	528.154	359.493
sp|Q9R0E1|PLOD3_MOUSE	Plod3	Multifunctional procollagen lysine hydroxylase and glycosyltransferase LH3 OS=Mus musculus OX=10090 GN=Plod3 PE=1 SV=1	512	4	C	UR	416.593	442.38	570.713	462.048	534.84	467.04	253.222	492.464	707.95	570.399	507.53
sp|Q9D162-2|CC167_MOUSE	Ccdc167	Isoform 2 of Coiled-coil domain-containing protein 167 OS=Mus musculus OX=10090 GN=Ccdc167	513	2	C	UR	360.655	420.944	246.146	509.553	160.083	414.371	79.0035	242.4	511.323	348.274	246.815
tr|D4AFX7|D4AFX7_MOUSE	Dnajc13	DnaJ heat shock protein family (Hsp40) member C13 OS=Mus musculus OX=10090 GN=Dnajc13 PE=1 SV=1	514	19	C	UR	2617.63	2412.92	1567.57	2824.34	1669.13	2613.87	1376.99	1773.52	2135.32	1841.64	2241.64
sp|P09803|CADH1_MOUSE	Cdh1	Cadherin-1 OS=Mus musculus OX=10090 GN=Cdh1 PE=1 SV=1	515	26	C	UR	2653	2937.55	4004.5	2496.88	3214.97	1372.71	3738.69	2664.06	2013.24	2030.92	2432.03
sp|Q920A5|RISC_MOUSE	Scpep1	Retinoid-inducible serine carboxypeptidase OS=Mus musculus OX=10090 GN=Scpep1 PE=1 SV=2	516	8	C	UR	1712.58	2663.28	497.771	1825.49	2488.83	1785.71	437.766	2232.85	2472.17	2287.72	2477.22
sp|P43025|TETN_MOUSE	Clec3b	Tetranectin OS=Mus musculus OX=10090 GN=Clec3b PE=1 SV=2	517	2	C	UR	53.1693	104.203	7.55059	90.8054	99.5704	69.8217	3.70387	49.9317	84.6957	120.3	94.701
sp|Q61335|BAP31_MOUSE	Bcap31	B-cell receptor-associated protein 31 OS=Mus musculus OX=10090 GN=Bcap31 PE=1 SV=4	518	9	C	UR	1776.62	927.658	180.649	1984.67	345.295	1981.39	98.4103	822.039	1475.29	1300.02	728.428
sp|Q8BH24|TM9S4_MOUSE	Tm9sf4	Transmembrane 9 superfamily member 4 OS=Mus musculus OX=10090 GN=Tm9sf4 PE=1 SV=1	519	9	C	UR	2133.72	1568.86	2403.21	2076.4	1049.01	1856.15	1562.69	975.623	1406.95	1069.27	931.831
sp|Q8VHI3|OFUT2_MOUSE	Pofut2	GDP-fucose protein O-fucosyltransferase 2 OS=Mus musculus OX=10090 GN=Pofut2 PE=1 SV=1	520	3	C	UR	918.413	900.885	818.339	887.256	1062.51	751.336	537.679	823.122	868.542	868.398	909.312
sp|Q05512|MARK2_MOUSE	Mark2	Serine/threonine-protein kinase MARK2 OS=Mus musculus OX=10090 GN=Mark2 PE=1 SV=3	521	4	C	UR	940.719	830.084	1212.24	933.052	684.774	854.362	953.433	662.286	749.284	600.151	808.942
sp|Q03141|MARK3_MOUSE	Mark3	MAP/microtubule affinity-regulating kinase 3 OS=Mus musculus OX=10090 GN=Mark3 PE=1 SV=2	521	2	C	UR	34.0572	35.8138	96.4968	36.4523	12.6153	35.4987	60.5451	26.2251	25.8646	27.0189	26.0992
sp|O70252|HMOX2_MOUSE	Hmox2	Heme oxygenase 2 OS=Mus musculus OX=10090 GN=Hmox2 PE=1 SV=1	522	9	C	UR	1574.02	869.814	615.019	1244.37	892.38	1317.35	537.377	860.374	1156.19	1185.34	799.771
sp|Q99JY9|ARP3_MOUSE	Actr3	Actin-related protein 3 OS=Mus musculus OX=10090 GN=Actr3 PE=1 SV=3	523	16	C	UR	2890.46	4633.69	486.849	2349.48	3463.8	1917.36	351.449	2580.37	2255.16	2248.57	3092.16
sp|Q9D1P4|CHRD1_MOUSE	Chordc1	Cysteine and histidine-rich domain-containing protein 1 OS=Mus musculus OX=10090 GN=Chordc1 PE=1 SV=1	524	3	C	UR	417.583	559.187	370.166	424.859	287.046	460.487	598.243	371.623	578.789	394.758	412.274
sp|Q9JKR6|HYOU1_MOUSE	Hyou1	Hypoxia up-regulated protein 1 OS=Mus musculus OX=10090 GN=Hyou1 PE=1 SV=1	525	16	C	UR	3034.37	3527.13	2596.22	3499.83	4469.52	2341.71	1086.34	3199.56	3127.28	3197.9	4153.36
sp|Q99MZ6|MYO7B_MOUSE	Myo7b	Unconventional myosin-VIIb OS=Mus musculus OX=10090 GN=Myo7b PE=1 SV=3	526	21	C	UR	6161.71	3805.06	4705.64	5174.7	3993.37	4818.26	3183.55	5330.99	4343.06	4578.09	5061.28
sp|P97479|MYO7A_MOUSE	Myo7a	Unconventional myosin-VIIa OS=Mus musculus OX=10090 GN=Myo7a PE=1 SV=2	526	3	C	UR	197.546	129.797	161.825	188.442	118.083	151.583	105.163	146.319	187.084	140.785	181.025
sp|Q9JLZ8|SIGIR_MOUSE	Sigirr	Single Ig IL-1-related receptor OS=Mus musculus OX=10090 GN=Sigirr PE=1 SV=2	527	4	C	UR	130.287	108.411	105.619	145.257	60.4714	166.523	84.9805	121.843	146.949	150.635	110.466
sp|Q64726|ZA2G_MOUSE	Azgp1	Zinc-alpha-2-glycoprotein OS=Mus musculus OX=10090 GN=Azgp1 PE=1 SV=2	528	5	C	UR	355.455	443.549	1507.21	258.42	356.569	214.497	901.495	255.165	355.241	331.043	395.702
sp|Q9CT10|RANB3_MOUSE	Ranbp3	Ran-binding protein 3 OS=Mus musculus OX=10090 GN=Ranbp3 PE=1 SV=2	529	4	C	UR	244.038	236.822	79.4081	185.266	224.025	322.633	132.644	284.849	355.333	302.809	310.802
sp|Q60597|ODO1_MOUSE	Ogdh	2-oxoglutarate dehydrogenase, mitochondrial OS=Mus musculus OX=10090 GN=Ogdh PE=1 SV=3	530	21	C	UR	2936.54	3292.54	2842.92	3411.61	4113.41	2685.58	2638.83	2807.11	2173.49	2291.58	2979.52
tr|E9Q7L0|E9Q7L0_MOUSE	Ogdhl	Oxoglutarate dehydrogenase-like OS=Mus musculus OX=10090 GN=Ogdhl PE=1 SV=1	530	4	C	UR	180.214	194.68	308.706	199.578	172.822	290.161	219.588	152.765	155.649	174.832	154.321
sp|Q99JB2|STML2_MOUSE	Stoml2	Stomatin-like protein 2, mitochondrial OS=Mus musculus OX=10090 GN=Stoml2 PE=1 SV=1	531	8	C	UR	583.388	545.009	104.517	549.421	696.125	358.571	319.434	545.577	472.477	502.495	686.615
tr|F8VQJ3|F8VQJ3_MOUSE	Lamc1	Laminin subunit gamma-1 OS=Mus musculus OX=10090 GN=Lamc1 PE=1 SV=1	532	23	C	UR	1366.24	2163.27	2635.3	1511.83	1660.99	3440.66	3134.48	1165.66	1852.9	1758.91	954.689
sp|P32507|NECT2_MOUSE	Nectin2	Nectin-2 OS=Mus musculus OX=10090 GN=Nectin2 PE=1 SV=2	533	8	C	UR	438.006	519.22	148.001	373.705	575.011	295.558	323.104	448.247	304.11	357.429	483.351
sp|Q80Z19|MUC2_MOUSE	Muc2	Mucin-2 (Fragments) OS=Mus musculus OX=10090 GN=Muc2 PE=1 SV=2	534	26	C	UR	2843.87	2932.26	10844.5	2714.8	3545.93	1764.14	5421.46	1570.64	1978.62	1172.96	1139.39
sp|Q8VHK9|DHX36_MOUSE	Dhx36	ATP-dependent DNA/RNA helicase DHX36 OS=Mus musculus OX=10090 GN=Dhx36 PE=1 SV=2	535	2	C	UR	290.488	243.824	326.695	318.537	239.481	317.555	326.991	257.371	361.856	260.986	266.228
sp|Q9CRB0|SNX24_MOUSE	Snx24	Sorting nexin-24 OS=Mus musculus OX=10090 GN=Snx24 PE=1 SV=1	536	1	C	UR	9.66061	5.34664	2.85885	7.82771	10.8102	23.4433	1.50328	9.09246	22.2164	8.93819	8.94365
sp|Q922R5|P4R3B_MOUSE	Ppp4r3b	Serine/threonine-protein phosphatase 4 regulatory subunit 3B OS=Mus musculus OX=10090 GN=Ppp4r3b PE=1 SV=2	537	3	C	UR	348.989	231.462	197.869	398.733	296.765	577.23	169.781	453.804	477.018	396.176	361.98
sp|Q6P2K6|P4R3A_MOUSE	Ppp4r3a	Serine/threonine-protein phosphatase 4 regulatory subunit 3A OS=Mus musculus OX=10090 GN=Ppp4r3a PE=1 SV=1	537	3	C	UR	357.628	263.265	249.124	336.982	357.064	402.467	258.861	352.973	382.365	293.571	334.7
sp|Q9ESE1|LRBA_MOUSE	Lrba	Lipopolysaccharide-responsive and beige-like anchor protein OS=Mus musculus OX=10090 GN=Lrba PE=1 SV=1	538	11	C	UR	1284.21	1130.7	783.757	1392.47	793.922	1185.52	584.853	972.588	1046.55	938.365	931.225
sp|Q9EPN1|NBEA_MOUSE	Nbea	Neurobeachin OS=Mus musculus OX=10090 GN=Nbea PE=1 SV=1	538	4	C	UR	1027.18	705.414	480.529	1047.04	626.564	1064.57	375.639	692.973	944.902	699.616	818.357
sp|Q8R146|APEH_MOUSE	Apeh	Acylamino-acid-releasing enzyme OS=Mus musculus OX=10090 GN=Apeh PE=1 SV=3	539	17	C	UR	1286.35	1620.48	2629.76	1129.81	1918.92	1038.64	3404.05	1358.62	1103.4	1085.88	1330.95
sp|O08788|DCTN1_MOUSE	Dctn1	Dynactin subunit 1 OS=Mus musculus OX=10090 GN=Dctn1 PE=1 SV=3	540	22	C	UR	3221.98	3585.99	668.116	3015.15	3651.49	2783.98	477.258	3566.08	2895.74	3243.21	3407.66
sp|Q61838|PZP_MOUSE	Pzp	Pregnancy zone protein OS=Mus musculus OX=10090 GN=Pzp PE=1 SV=3	541	21	C	UR	1680.05	2088.23	6186.4	1211.51	1896.19	1046.94	4785.51	1376.39	2516.5	2244.23	2129.9
sp|Q8JZY2|COMDA_MOUSE	Commd10	COMM domain-containing protein 10 OS=Mus musculus OX=10090 GN=Commd10 PE=1 SV=1	542	1	C	UR	19.9924	15.5383	8.5016	26.9725	38.5966	24.0318	1.0418	36.9468	30.025	31.2733	27.7283
sp|Q9JI90|RNF14_MOUSE	Rnf14	E3 ubiquitin-protein ligase RNF14 OS=Mus musculus OX=10090 GN=Rnf14 PE=1 SV=2	543	4	C	UR	110.784	66.0993	43.8713	82.1975	82.7652	103.825	39.4686	88.0834	85.7547	96.7877	87.4239
sp|Q01405|SC23A_MOUSE	Sec23a	Protein transport protein Sec23A OS=Mus musculus OX=10090 GN=Sec23a PE=1 SV=2	544	9	C	UR	1371.76	801.565	532.643	1009.35	851.55	1251.79	554.314	832.985	885.984	768.085	1011.32
sp|Q9D662|SC23B_MOUSE	Sec23b	Protein transport protein Sec23B OS=Mus musculus OX=10090 GN=Sec23b PE=1 SV=1	544	11	C	UR	1650.82	1372.27	380.893	1542.12	1552.36	1703.47	307.874	1386.92	1491.79	1177.58	1368.23
sp|Q8CHG3|GCC2_MOUSE	Gcc2	GRIP and coiled-coil domain-containing protein 2 OS=Mus musculus OX=10090 GN=Gcc2 PE=1 SV=2	545	17	C	UR	2605.29	1685.52	528.638	1983.61	3288.34	3109.81	461.989	3829.16	2638.82	3584.36	3013.51
sp|Q9D5J6|SHPK_MOUSE	Shpk	Sedoheptulokinase OS=Mus musculus OX=10090 GN=Shpk PE=1 SV=1	546	4	C	UR	287.397	325.503	216.856	223.115	362.452	177.809	74.4297	184.438	180.809	149.725	184.569
sp|Q8R2U0|SEH1_MOUSE	Seh1l	Nucleoporin SEH1 OS=Mus musculus OX=10090 GN=Seh1l PE=2 SV=1	547	6	C	UR	702.114	554.307	325.237	716.968	809.09	798.356	295.248	739.932	750.157	748.334	760.403
sp|Q9EPB4|ASC_MOUSE	Pycard	Apoptosis-associated speck-like protein containing a CARD OS=Mus musculus OX=10090 GN=Pycard PE=1 SV=1	548	5	C	UR	633.459	399.612	109.308	348.123	1305.12	850.136	92.4778	1053.04	465.373	726.856	647.031
sp|Q8C878|UBA3_MOUSE	Uba3	NEDD8-activating enzyme E1 catalytic subunit OS=Mus musculus OX=10090 GN=Uba3 PE=1 SV=2	549	5	C	UR	962.306	642.307	139.401	680.698	1103.03	840.544	199.974	832.92	810.822	691.5	818.083
sp|Q9JHU4|DYHC1_MOUSE	Dync1h1	Cytoplasmic dynein 1 heavy chain 1 OS=Mus musculus OX=10090 GN=Dync1h1 PE=1 SV=2	550	25	C	UR	4058.9	3355.34	1999.02	4179.7	3495.44	4650.66	1401.92	4223.51	4532.37	4476.38	3869.06
sp|Q6P5E4|UGGG1_MOUSE	Uggt1	UDP-glucose:glycoprotein glucosyltransferase 1 OS=Mus musculus OX=10090 GN=Uggt1 PE=1 SV=4	551	25	C	UR	4296.56	3917.32	4830.1	4491.92	4675.65	4260.42	4452.22	4071.55	4024.25	3554.12	4926.82
sp|Q61510|TRI25_MOUSE	Trim25	E3 ubiquitin/ISG15 ligase TRIM25 OS=Mus musculus OX=10090 GN=Trim25 PE=1 SV=2	552	5	C	UR	541.523	459.528	328.879	564.683	327.091	674.647	233.227	544.601	621.175	548.543	531.098
sp|Q9CR68|UCRI_MOUSE	Uqcrfs1	Cytochrome b-c1 complex subunit Rieske, mitochondrial OS=Mus musculus OX=10090 GN=Uqcrfs1 PE=1 SV=1	553	8	C	UR	811.368	1036.16	1802.26	914.427	1342.23	539.146	1405.83	861.836	673.233	746.841	958.766
sp|Q9CQC6|BZW1_MOUSE	Bzw1	Basic leucine zipper and W2 domain-containing protein 1 OS=Mus musculus OX=10090 GN=Bzw1 PE=1 SV=1	554	9	C	UR	1822.85	1220.45	1944.62	2057.15	1368.53	2724.1	1755.74	2097.65	1935.62	1903.25	1754.06
sp|Q91VK1|BZW2_MOUSE	Bzw2	Basic leucine zipper and W2 domain-containing protein 2 OS=Mus musculus OX=10090 GN=Bzw2 PE=1 SV=1	554	2	C	UR	279.103	258.452	353.672	419.623	254.473	547.007	316.932	384.19	453.397	339.498	288.709
sp|Q91YR7|PRP6_MOUSE	Prpf6	Pre-mRNA-processing factor 6 OS=Mus musculus OX=10090 GN=Prpf6 PE=1 SV=1	555	5	C	UR	359.354	304.566	217.719	421.418	283.028	435.652	242.769	357.997	476.488	378.494	332.2
sp|Q64311|NTAN1_MOUSE	Ntan1	Protein N-terminal asparagine amidohydrolase OS=Mus musculus OX=10090 GN=Ntan1 PE=1 SV=3	556	3	C	UR	260.694	130.645	55.3005	194.441	205.641	208.086	48.8006	201.771	127.61	189.733	169.078
sp|Q9R269|PEPL_MOUSE	Ppl	Periplakin OS=Mus musculus OX=10090 GN=Ppl PE=1 SV=1	557	3	C	UR	248.616	111.278	94.6054	166.059	248.639	120.728	92.1593	341.238	290.517	419.387	329.135
sp|Q6PFD9|NUP98_MOUSE	Nup98	Nuclear pore complex protein Nup98-Nup96 OS=Mus musculus OX=10090 GN=Nup98 PE=1 SV=2	558	10	C	UR	1180.26	1084.63	311.06	1016.12	1175.02	1148.76	195.837	1432.67	1469.53	1469.01	1362.89
sp|Q80UP5|AN13A_MOUSE	Ankrd13a	Ankyrin repeat domain-containing protein 13A OS=Mus musculus OX=10090 GN=Ankrd13a PE=1 SV=2	559	8	C	UR	865.481	792.817	718.742	1017.89	901.965	1128.91	664.088	1169.31	1081.66	1041.49	1036.01
sp|Q8VCF1-3|CANT1_MOUSE	Cant1	Isoform 3 of Soluble calcium-activated nucleotidase 1 OS=Mus musculus OX=10090 GN=Cant1	560	8	C	UR	3230.22	3163.28	1451.04	3191.61	2184.02	3135.03	1720.22	1894.76	1314.73	1676.23	1876.15
sp|Q80XR2|AT2C1_MOUSE	Atp2c1	Calcium-transporting ATPase type 2C member 1 OS=Mus musculus OX=10090 GN=Atp2c1 PE=1 SV=2	561	10	C	UR	1144.13	595.194	1000.11	1097.42	332.138	877.891	688.602	452.651	728.063	622.601	435.77
sp|Q9QUM0|ITA2B_MOUSE	Itga2b	Integrin alpha-IIb OS=Mus musculus OX=10090 GN=Itga2b PE=1 SV=2	562	1	C	UR	34.8445	36.4232	79.3235	25.246	25.5529	22.81	146.814	25.2814	34.3813	34.8542	28.8642
sp|Q9DC70|NDUS7_MOUSE	Ndufs7	NADH dehydrogenase [ubiquinone] iron-sulfur protein 7, mitochondrial OS=Mus musculus OX=10090 GN=Ndufs7 PE=1 SV=1	563	9	C	UR	2174.26	2178.06	1985.6	2327.89	1841.73	1499.9	753.048	1677.03	1749.46	1435.92	1760.49
sp|Q8BH95|ECHM_MOUSE	Echs1	Enoyl-CoA hydratase, mitochondrial OS=Mus musculus OX=10090 GN=Echs1 PE=1 SV=1	564	8	C	UR	2785.47	3937.48	354.64	3214.23	4157.51	1830.61	335.599	2875.74	2355.59	2889.67	4141.01
sp|Q8R3B1|PLCD1_MOUSE	Plcd1	1-phosphatidylinositol 4,5-bisphosphate phosphodiesterase delta-1 OS=Mus musculus OX=10090 GN=Plcd1 PE=1 SV=2	565	5	C	UR	607.904	497.32	302.019	476.149	500.284	395.861	253.785	418.275	379.887	401.992	529.146
sp|Q8VCC1|PGDH_MOUSE	Hpgd	15-hydroxyprostaglandin dehydrogenase [NAD(+)] OS=Mus musculus OX=10090 GN=Hpgd PE=1 SV=1	566	7	C	UR	1383.53	691.557	339.487	917.258	575.677	875.241	418.225	556.629	464.532	500.353	498.151
sp|Q61990|PCBP2_MOUSE	Pcbp2	Poly(rC)-binding protein 2 OS=Mus musculus OX=10090 GN=Pcbp2 PE=1 SV=1	567	6	C	UR	1059.43	528.078	168.753	860.22	642.608	1879.6	175.174	1085.2	1294.05	1303.39	1011.12
sp|P60335|PCBP1_MOUSE	Pcbp1	Poly(rC)-binding protein 1 OS=Mus musculus OX=10090 GN=Pcbp1 PE=1 SV=1	567	10	C	UR	876.941	385.759	128.772	592.518	703.759	1358.42	121.306	1053.54	1043.61	995.955	1078.42
sp|Q8C196|CPSM_MOUSE	Cps1	Carbamoyl-phosphate synthase [ammonia], mitochondrial OS=Mus musculus OX=10090 GN=Cps1 PE=1 SV=2	568	14	C	UR	731.24	911.354	854.964	1553.72	1432.71	3790.68	880.567	1778.7	553.15	873.699	1280.16
sp|Q8QZS1|HIBCH_MOUSE	Hibch	3-hydroxyisobutyryl-CoA hydrolase, mitochondrial OS=Mus musculus OX=10090 GN=Hibch PE=1 SV=1	569	7	C	UR	2506.86	2645.28	311.35	2201.43	3277.75	2045.57	279.636	2290.1	1951.17	2094.26	2589.9
sp|Q91WI7-2|ITFG2_MOUSE	Itfg2	Isoform 2 of KICSTOR complex protein ITFG2 OS=Mus musculus OX=10090 GN=Itfg2	570	3	C	UR	48.8552	76.6928	17.8603	41.5761	68.1445	43.3246	7.78623	53.9891	46.1637	53.3803	48.0931
sp|Q6NZL6|TONSL_MOUSE	Tonsl	Tonsoku-like protein OS=Mus musculus OX=10090 GN=Tonsl PE=1 SV=2	571	1	C	UR	23.9499	14.5954	5.67388	25.3959	14.8553	26.8856	5.1052	28.2838	31.9451	17.2413	11.6681
sp|Q5SVL6|RPGP2_MOUSE	Rap1gap2	Rap1 GTPase-activating protein 2 OS=Mus musculus OX=10090 GN=Rap1gap2 PE=1 SV=1	572	5	C	UR	826.872	644.952	379.013	869.054	943.84	1016.28	233.049	988.644	873.197	865.552	1030
sp|A2ALS5-2|RPGP1_MOUSE	Rap1gap	Isoform 2 of Rap1 GTPase-activating protein 1 OS=Mus musculus OX=10090 GN=Rap1gap	572	2	C	UR	600.283	391.746	180.386	591.348	663.569	809.849	130.517	674.119	602.303	651.307	564.454
sp|Q91VU6|DCA11_MOUSE	Dcaf11	DDB1- and CUL4-associated factor 11 OS=Mus musculus OX=10090 GN=Dcaf11 PE=1 SV=1	573	2	C	UR	417.462	351.072	182.93	310.007	432.988	316.71	190.518	400.323	375.913	305.807	365.528
tr|Q5SW46|Q5SW46_MOUSE	Lpo	Lactoperoxidase OS=Mus musculus OX=10090 GN=Lpo PE=1 SV=1	574	8	C	UR	587.881	625.966	1375.54	650.555	763.741	278.871	1079.28	476.055	393.604	336.872	491.789
sp|P35230|REG3B_MOUSE	Reg3b	Regenerating islet-derived protein 3-beta OS=Mus musculus OX=10090 GN=Reg3b PE=1 SV=1	575	4	C	UR	212.247	167.503	1880.59	67.5741	54.5187	63.3159	2976.97	98.7918	39.1505	93.3823	80.7804
sp|Q922H9|ZN330_MOUSE	Znf330	Zinc finger protein 330 OS=Mus musculus OX=10090 GN=Znf330 PE=1 SV=1	576	2	C	UR	209.241	346.732	169.543	181.733	283.688	218.686	206.933	355.533	270.385	251.26	231.694
sp|Q8BHG1|NRDC_MOUSE	Nrdc	Nardilysin OS=Mus musculus OX=10090 GN=Nrdc PE=1 SV=1	577	12	C	UR	2315.86	1912.18	1933.4	1915.22	2944.08	1876.13	3806.03	2541.16	2205.14	2041.51	2319.83
sp|Q7TSV4|PGM2_MOUSE	Pgm2	Phosphoglucomutase-2 OS=Mus musculus OX=10090 GN=Pgm2 PE=1 SV=1	578	15	C	UR	3247.79	3489.41	756.378	2357.92	4363.69	2344.54	817.36	2813.5	2474.23	2175.29	3068.41
sp|Q9CRY7|GDPD1_MOUSE	Gdpd1	Lysophospholipase D GDPD1 OS=Mus musculus OX=10090 GN=Gdpd1 PE=1 SV=1	579	8	C	UR	1440.36	1175.6	4483.18	1635.71	356.387	1656.72	4929.43	623.619	1099.54	872.417	641.12
sp|Q99MN9|PCCB_MOUSE	Pccb	Propionyl-CoA carboxylase beta chain, mitochondrial OS=Mus musculus OX=10090 GN=Pccb PE=1 SV=2	580	12	C	UR	2324.59	2727	902.398	2275.4	2984.23	1780.05	939.102	1872.32	1286.4	1451.63	1798.67
sp|Q8C147|DOCK8_MOUSE	Dock8	Dedicator of cytokinesis protein 8 OS=Mus musculus OX=10090 GN=Dock8 PE=1 SV=4	581	2	C	UR	325.81	289.603	286.122	432.823	209.625	453.086	234.474	296.279	492.833	490.586	294.804
sp|Q8R1A4|DOCK7_MOUSE	Dock7	Dedicator of cytokinesis protein 7 OS=Mus musculus OX=10090 GN=Dock7 PE=1 SV=3	581	9	C	UR	1655.18	1383.76	720.447	1748.47	816.575	1498.32	430.173	994.971	1341.3	1261.28	1092.5
sp|Q8VDR9|DOCK6_MOUSE	Dock6	Dedicator of cytokinesis protein 6 OS=Mus musculus OX=10090 GN=Dock6 PE=1 SV=4	581	1	C	UR	36.6086	19.7948	6.16809	42.2107	16.8251	47.2858	12.6158	23.7835	33.665	40.0358	32.0342
sp|O88879|APAF_MOUSE	Apaf1	Apoptotic protease-activating factor 1 OS=Mus musculus OX=10090 GN=Apaf1 PE=1 SV=3	582	11	C	UR	1191.71	1247.14	610.834	1303.3	1108.62	1640.43	609.841	1267.72	1711.14	1340.82	1358.73
sp|Q8R1I1|QCR9_MOUSE	Uqcr10	Cytochrome b-c1 complex subunit 9 OS=Mus musculus OX=10090 GN=Uqcr10 PE=1 SV=1	583	2	C	UR	824.347	692.418	579.348	848.956	924.873	484.621	628.851	562.64	488.745	474.409	850.615
sp|Q91V92|ACLY_MOUSE	Acly	ATP-citrate synthase OS=Mus musculus OX=10090 GN=Acly PE=1 SV=1	584	22	C	UR	2931.91	3618.83	1052.81	3631.55	5791.87	3321.5	1066.66	3470.82	2887.61	2645.14	3640.72
sp|Q9D8I3|GLOD5_MOUSE	Glod5	Glyoxalase domain-containing protein 5 OS=Mus musculus OX=10090 GN=Glod5 PE=1 SV=1	585	1	C	UR	158.482	193.658	24.4549	81.7961	160.038	61.8127	33.7647	87.1102	59.7812	86.1734	76.2681
sp|Q9CZ30|OLA1_MOUSE	Ola1	Obg-like ATPase 1 OS=Mus musculus OX=10090 GN=Ola1 PE=1 SV=1	586	11	C	UR	2665.6	2916.11	296.659	1774.06	3461.97	1735.52	153.499	2816.09	2511.77	2214.05	2809.54
sp|O35744|CHIL3_MOUSE	Chil3	Chitinase-like protein 3 OS=Mus musculus OX=10090 GN=Chil3 PE=1 SV=2	587	12	C	UR	2711.26	1566.05	2360.99	1896.75	1059.43	1299.79	2852.87	1026.73	4367.49	3167.36	1946.61
sp|Q4PZA2|ECE1_MOUSE	Ece1	Endothelin-converting enzyme 1 OS=Mus musculus OX=10090 GN=Ece1 PE=1 SV=1	588	3	C	UR	368.791	335.955	1274.87	367.896	218.568	335.285	879.846	242.366	215.426	239.99	289.449
tr|Q3U1U4|Q3U1U4_MOUSE	Gm49368	Predicted gene, 49368 OS=Mus musculus OX=10090 GN=Gm49368 PE=1 SV=1	589	7	C	UR	724.516	801.151	1705.58	1281.72	360.059	917.688	2684.7	639.322	1719.05	1697.24	881.593
sp|P50580|PA2G4_MOUSE	Pa2g4	Proliferation-associated protein 2G4 OS=Mus musculus OX=10090 GN=Pa2g4 PE=1 SV=3	590	6	C	UR	841.134	1289.57	62.4604	761.235	1513.98	630	57.2	1570.16	1141.49	953.692	1429.9
sp|Q3UQ28|PXDN_MOUSE	Pxdn	Peroxidasin homolog OS=Mus musculus OX=10090 GN=Pxdn PE=1 SV=2	591	5	C	UR	446.384	654.085	552.779	348.156	391.119	1143.72	615.267	366.368	665.37	532.672	310.2
sp|P61458|PHS_MOUSE	Pcbd1	Pterin-4-alpha-carbinolamine dehydratase OS=Mus musculus OX=10090 GN=Pcbd1 PE=1 SV=2	592	2	C	UR	350.838	370.363	110.677	347.042	445.159	204.108	121.823	285.293	237.673	245.054	299.675
sp|Q99J99|THTM_MOUSE	Mpst	3-mercaptopyruvate sulfurtransferase OS=Mus musculus OX=10090 GN=Mpst PE=1 SV=4	593	8	C	UR	1222.82	1843.41	813.691	804.36	1010.63	461.84	174.781	390.944	556.869	424.273	406.991
sp|B2RY04|DOCK5_MOUSE	Dock5	Dedicator of cytokinesis protein 5 OS=Mus musculus OX=10090 GN=Dock5 PE=1 SV=2	594	17	C	UR	2178.09	1467.51	1357.62	2198.68	1299.84	2159.99	929.35	1730.44	2014.65	1788.81	1908.84
sp|Q8BUR4|DOCK1_MOUSE	Dock1	Dedicator of cytokinesis protein 1 OS=Mus musculus OX=10090 GN=Dock1 PE=1 SV=3	594	8	C	UR	1426.67	1218.17	861.323	1527.55	1128.49	1673.65	591.21	1424.29	1260.5	1485.76	1139.32
sp|Q8C3J5|DOCK2_MOUSE	Dock2	Dedicator of cytokinesis protein 2 OS=Mus musculus OX=10090 GN=Dock2 PE=1 SV=3	594	5	C	UR	385.63	328.161	639.389	533.984	304.154	809.778	715.173	440.865	893.926	828.374	444.871
sp|Q9JJE4|PAQR4_MOUSE	Paqr4	Progestin and adipoQ receptor family member 4 OS=Mus musculus OX=10090 GN=Paqr4 PE=2 SV=1	595	2	C	UR	108.83	76.7939	312.464	128.022	46.6496	89.7598	189.157	42.2457	76.8423	52.4665	61.2661
sp|Q8BZB2|COAC_MOUSE	Ppcdc	Phosphopantothenoylcysteine decarboxylase OS=Mus musculus OX=10090 GN=Ppcdc PE=1 SV=1	596	3	C	UR	219.424	321.283	286.515	190.707	280.777	329.224	564.069	376.501	257.257	293.654	304.343
sp|Q5SUR0|PUR4_MOUSE	Pfas	Phosphoribosylformylglycinamidine synthase OS=Mus musculus OX=10090 GN=Pfas PE=1 SV=1	597	12	C	UR	1827.84	2552.51	351.434	1772.64	3050.53	1827.79	439.833	2245.26	2142.04	1674.06	2168.75
sp|Q6ZQK0|CNDD3_MOUSE	Ncapd3	Condensin-2 complex subunit D3 OS=Mus musculus OX=10090 GN=Ncapd3 PE=1 SV=3	598	2	C	UR	115.808	107.789	319.422	175.549	74.5856	172.079	261.585	116.308	177.298	117.885	93.3866
sp|Q9CZR2|NALD2_MOUSE	Naalad2	N-acetylated-alpha-linked acidic dipeptidase 2 OS=Mus musculus OX=10090 GN=Naalad2 PE=1 SV=2	599	4	C	UR	109.42	175.859	1172.84	178.244	81.8996	531.721	1085.91	107.399	188.729	249.095	87.6287
sp|Q9D1J1|NECP2_MOUSE	Necap2	Adaptin ear-binding coat-associated protein 2 OS=Mus musculus OX=10090 GN=Necap2 PE=1 SV=1	600	4	C	UR	355.449	264.964	154.995	341.468	205.977	392.782	129.14	373.72	372.06	462.373	309.483
sp|Q9WU00|NRF1_MOUSE	Nrf1	Nuclear respiratory factor 1 OS=Mus musculus OX=10090 GN=Nrf1 PE=1 SV=2	601	2	C	UR	402.847	481.022	45.3032	561.45	320.513	438.518	24.2493	412.781	599.36	456.127	391.587
sp|Q3UNX5-2|ACSM3_MOUSE	Acsm3	Isoform 2 of Acyl-coenzyme A synthetase ACSM3, mitochondrial OS=Mus musculus OX=10090 GN=Acsm3	602	11	C	UR	2792.54	3225.69	2243.31	3009.94	1760.04	2076.38	832.968	1279.7	1650.72	1688.98	2174.61
sp|Q6A0A9|F120A_MOUSE	FAM120A	Constitutive coactivator of PPAR-gamma-like protein 1 OS=Mus musculus OX=10090 GN=FAM120A PE=1 SV=2	603	9	C	UR	1030.59	655.066	381.606	987.993	564.411	1151.59	356.7	827.613	1074.31	875.407	832.87
sp|Q8BIK4-2|DOCK9_MOUSE	Dock9	Isoform 2 of Dedicator of cytokinesis protein 9 OS=Mus musculus OX=10090 GN=Dock9	604	2	C	UR	111.592	90.0013	90.4669	133.943	85.0428	179.296	75.5438	87.5048	151.718	120.961	98.9804
sp|Q8BG60|TXNIP_MOUSE	Txnip	Thioredoxin-interacting protein OS=Mus musculus OX=10090 GN=Txnip PE=1 SV=1	605	3	C	UR	142.61	93.6483	103.314	113.97	82.6882	132.307	103.495	75.2191	97.9274	79.0327	89.8496
sp|P14234|FGR_MOUSE	Fgr	Tyrosine-protein kinase Fgr OS=Mus musculus OX=10090 GN=Fgr PE=1 SV=2	606	1	C	UR	11.3797	6.25463	20.6731	16.2026	8.74598	20.9144	16.9798	14.6224	30.9308	35.2806	12.0737
tr|L7N1X8|L7N1X8_MOUSE	Gm43302	Predicted gene 43302 OS=Mus musculus OX=10090 GN=Gm43302 PE=4 SV=2	607	3	C	UR	571.746	493.444	237.306	403.656	809.155	706.779	155.282	1099.04	1588.29	940.785	759.896
tr|Q8BTS3|Q8BTS3_MOUSE	Gbp9	Guanylate-binding protein 9 OS=Mus musculus OX=10090 GN=Gbp9 PE=1 SV=1	607	2	C	UR	59.3322	51.6855	28.2356	59.5953	98.5386	96.3137	12.8344	113.069	162.549	125.709	90.1872
sp|Q8BZN6-3|DOC10_MOUSE	Dock10	Isoform 3 of Dedicator of cytokinesis protein 10 OS=Mus musculus OX=10090 GN=Dock10	608	2	C	UR	33.8863	26.135	54.4872	42.6502	65.945	61.6364	29.67	68.2368	105.743	137.879	76.0077
sp|P27046|MA2A1_MOUSE	Man2a1	Alpha-mannosidase 2 OS=Mus musculus OX=10090 GN=Man2a1 PE=1 SV=2	609	18	C	UR	2149.28	2010.18	3797.34	2279.79	1929.72	1677.64	5290.19	1342.6	1403.49	1367.11	1766.55
sp|Q60847|COCA1_MOUSE	Col12a1	Collagen alpha-1(XII) chain OS=Mus musculus OX=10090 GN=Col12a1 PE=2 SV=3	610	17	C	UR	1235.72	1200.82	4529.96	1039.08	676.153	2048.54	5285.84	787.939	4748.53	2178.78	592.349
sp|Q99K70|RRAGC_MOUSE	Rragc	Ras-related GTP-binding protein C OS=Mus musculus OX=10090 GN=Rragc PE=1 SV=1	611	8	C	UR	1321.56	1223.85	1199.97	1284.17	1090.1	1288.23	1297.42	985.928	1239.26	1078.9	1181.53
sp|Q9CY97|SSU72_MOUSE	Ssu72	RNA polymerase II subunit A C-terminal domain phosphatase SSU72 OS=Mus musculus OX=10090 GN=Ssu72 PE=1 SV=1	612	4	C	UR	293.876	186.614	123.611	276.933	272.573	358.9	144.685	374.689	342.565	391.97	288.917
sp|Q6PDQ2|CHD4_MOUSE	Chd4	Chromodomain-helicase-DNA-binding protein 4 OS=Mus musculus OX=10090 GN=Chd4 PE=1 SV=1	613	12	C	UR	852.156	681.128	646.052	1082.69	854.658	956.449	458.483	1290.45	1042.06	1543.1	1071.86
sp|Q3TCN2|PLBL2_MOUSE	Plbd2	Putative phospholipase B-like 2 OS=Mus musculus OX=10090 GN=Plbd2 PE=1 SV=2	614	4	C	UR	68.9023	84.4532	233.289	63.84	102.809	52.6674	342.55	65.4667	50.7919	56.5806	70.0423
sp|Q9EQ06|DHB11_MOUSE	Hsd17b11	Estradiol 17-beta-dehydrogenase 11 OS=Mus musculus OX=10090 GN=Hsd17b11 PE=1 SV=1	615	4	C	UR	499.743	274.301	341.412	439.748	100.292	394.37	606.874	151.779	258.262	206.236	191.831
sp|Q8VCR2-2|DHB13_MOUSE	Hsd17b13	Isoform 2 of 17-beta-hydroxysteroid dehydrogenase 13 OS=Mus musculus OX=10090 GN=Hsd17b13	615	5	C	UR	625.751	295.677	725.88	550.662	101.95	1035.54	988.664	319.91	461.539	571.685	471.806
sp|P19157|GSTP1_MOUSE	Gstp1	Glutathione S-transferase P 1 OS=Mus musculus OX=10090 GN=Gstp1 PE=1 SV=2	616	9	C	UR	1119.25	1366.76	355.02	1045.1	1350.03	757.791	711.079	972.384	838.286	785.253	810.127
sp|E9Q555|RN213_MOUSE	Rnf213	E3 ubiquitin-protein ligase RNF213 OS=Mus musculus OX=10090 GN=Rnf213 PE=1 SV=2	617	25	C	UR	3244.6	1403.62	1774.7	2620.87	1719	3554.36	1121.82	3174.36	3921.79	3545.91	2513.55
sp|Q3US41-5|ESRP1_MOUSE	Esrp1	Isoform 5 of Epithelial splicing regulatory protein 1 OS=Mus musculus OX=10090 GN=Esrp1	618	6	C	UR	1328.54	1379.88	594.34	1312.93	1388.99	1267.28	418.646	1607.44	1322.1	1284.19	1289.22
sp|Q8K0G8|ESRP2_MOUSE	Esrp2	Epithelial splicing regulatory protein 2 OS=Mus musculus OX=10090 GN=Esrp2 PE=1 SV=1	618	1	C	UR	98.1432	123.374	13.9688	106.908	106.203	96.7914	13.1013	126.645	107.968	109.566	104.511
sp|Q9R0N0|GALK1_MOUSE	Galk1	Galactokinase OS=Mus musculus OX=10090 GN=Galk1 PE=1 SV=2	619	4	C	UR	269.879	146.02	145.35	254.546	162.248	407.358	101.652	276.746	259.49	334.08	184.403
sp|P27659|RL3_MOUSE	Rpl3	60S ribosomal protein L3 OS=Mus musculus OX=10090 GN=Rpl3 PE=1 SV=3	620	17	C	UR	4394.45	5357.59	3328.06	6106.32	3182.75	4876.4	3710.23	5452.77	5411.2	4140.31	5237.83
sp|Q5U462|CDCP1_MOUSE	Cdcp1	CUB domain-containing protein 1 OS=Mus musculus OX=10090 GN=Cdcp1 PE=2 SV=1	621	10	C	UR	1201.33	1296.9	1879.9	1152.1	1383.36	920.349	3775.61	1308.13	918.342	882.79	1439.2
sp|Q924W5|SMC6_MOUSE	Smc6	Structural maintenance of chromosomes protein 6 OS=Mus musculus OX=10090 GN=Smc6 PE=1 SV=1	622	3	C	UR	118.247	117.867	34.7655	153.084	109.328	130.405	27.4936	123.809	158.699	111.549	110.957
sp|Q61699|HS105_MOUSE	Hsph1	Heat shock protein 105 kDa OS=Mus musculus OX=10090 GN=Hsph1 PE=1 SV=2	623	9	C	UR	531.589	259.47	450.55	555.012	890.994	964.938	315.459	1435.23	1445.87	1767.43	1277.12
sp|P11438|LAMP1_MOUSE	Lamp1	Lysosome-associated membrane glycoprotein 1 OS=Mus musculus OX=10090 GN=Lamp1 PE=1 SV=2	624	5	C	UR	845.635	928.613	3147.94	919.507	785.08	692.342	4038.64	738.576	456.379	674.763	849.128
sp|A2A5R2|BIG2_MOUSE	Arfgef2	Brefeldin A-inhibited guanine nucleotide-exchange protein 2 OS=Mus musculus OX=10090 GN=Arfgef2 PE=1 SV=1	625	7	C	UR	834.114	601.39	1556.3	1032.03	508.749	1259.35	1270.02	941.301	907.503	923.782	708.814
sp|G3X9K3|BIG1_MOUSE	Arfgef1	Brefeldin A-inhibited guanine nucleotide-exchange protein 1 OS=Mus musculus OX=10090 GN=Arfgef1 PE=1 SV=1	625	16	C	UR	2904.26	2152.37	2389.18	2958.13	1715.33	2942.5	1703.48	2176.17	2497.5	2056.03	2065.87
sp|Q923B6|STEA4_MOUSE	Steap4	Metalloreductase STEAP4 OS=Mus musculus OX=10090 GN=Steap4 PE=1 SV=1	626	4	C	UR	422.142	216.287	191.848	323.244	131.972	487.622	166.114	287.319	492.402	574.282	194.685
sp|Q9EQ20|MMSA_MOUSE	Aldh6a1	Methylmalonate-semialdehyde dehydrogenase [acylating], mitochondrial OS=Mus musculus OX=10090 GN=Aldh6a1 PE=1 SV=1	627	2	C	UR	566.817	774.918	164.875	569.844	567.455	802.873	109.72	457.882	608.279	638.688	611.495
sp|Q8BHC0|LYVE1_MOUSE	Lyve1	Lymphatic vessel endothelial hyaluronic acid receptor 1 OS=Mus musculus OX=10090 GN=Lyve1 PE=1 SV=1	628	3	C	UR	310.78	207.098	365.198	313.205	192.429	741.703	175.406	206.848	497.23	392.583	134.082
sp|Q6ZWR6|SYNE1_MOUSE	Syne1	Nesprin-1 OS=Mus musculus OX=10090 GN=Syne1 PE=1 SV=2	629	4	C	UR	164.875	182.263	198.577	254.485	136.856	455.686	150.09	208.708	449.726	438.349	157.721
sp|P11032|GRAA_MOUSE	Gzma	Granzyme A OS=Mus musculus OX=10090 GN=Gzma PE=1 SV=2	630	6	C	UR	767.551	225.608	1517.13	562.329	559.974	736.476	3913.62	913.053	693.523	636.284	956.323
sp|P20108|PRDX3_MOUSE	Prdx3	Thioredoxin-dependent peroxide reductase, mitochondrial OS=Mus musculus OX=10090 GN=Prdx3 PE=1 SV=1	631	6	C	UR	729.911	1432.26	543.745	1111.86	1132.37	535.557	510.956	831.896	540.447	800.166	823.982
sp|Q6GQT6|SCAP_MOUSE	Scap	Sterol regulatory element-binding protein cleavage-activating protein OS=Mus musculus OX=10090 GN=Scap PE=1 SV=1	633	2	C	UR	204.869	184.46	988.319	241.81	55.6166	196.078	533.955	104.156	205.63	155.354	115.38
sp|Q8BFR4|GNS_MOUSE	Gns	N-acetylglucosamine-6-sulfatase OS=Mus musculus OX=10090 GN=Gns PE=1 SV=1	634	6	C	UR	483.16	590.191	1892.98	448.012	687.091	421.33	2303.76	497.764	462.339	494.512	560.383
sp|O70503|DHB12_MOUSE	Hsd17b12	Very-long-chain 3-oxoacyl-CoA reductase OS=Mus musculus OX=10090 GN=Hsd17b12 PE=1 SV=1	635	2	C	UR	302.547	267.656	1593.17	330.592	41.0703	316.949	1432.09	128.765	271.518	196.938	156.944
sp|P46061|RAGP1_MOUSE	Rangap1	Ran GTPase-activating protein 1 OS=Mus musculus OX=10090 GN=Rangap1 PE=1 SV=2	636	6	C	UR	439.109	970.757	279.932	766.363	1475.72	647.642	209.56	1284.22	1045.03	1102.37	1315.99
tr|Q8R056|Q8R056_MOUSE	Prom1	Prom1 protein OS=Mus musculus OX=10090 GN=Prom1 PE=1 SV=1	637	9	C	UR	1511.87	1261.03	2490.72	1474.5	983.496	932.855	1041.41	1039.31	1039.45	858.588	1211
sp|P70280|VAMP7_MOUSE	Vamp7	Vesicle-associated membrane protein 7 OS=Mus musculus OX=10090 GN=Vamp7 PE=1 SV=1	638	3	C	UR	309.655	286.749	795.734	402.363	189.065	316.485	833.786	226.227	341.051	297.585	211.678
sp|Q9Z1T2|TSP4_MOUSE	Thbs4	Thrombospondin-4 OS=Mus musculus OX=10090 GN=Thbs4 PE=1 SV=1	639	6	C	UR	216.589	493.446	180.406	482.836	279.364	176.538	178.838	228.971	513.206	368.401	401.968
sp|Q9R0P3|ESTD_MOUSE	Esd	S-formylglutathione hydrolase OS=Mus musculus OX=10090 GN=Esd PE=1 SV=1	640	4	C	UR	989.486	949.325	557.565	776.761	587.854	841.175	340.732	737.701	816.417	804.684	663.219
tr|A0A338P722|A0A338P722_MOUSE	Alg3	Dol-P-Man:Man(5)GlcNAc(2)-PP-Dol alpha-1,3-mannosyltransferase (Fragment) OS=Mus musculus OX=10090 GN=Alg3 PE=4 SV=1	641	1	C	UR	198.032	210.566	56.1959	233.426	326.366	255.022	15.4038	248.424	223.375	241.582	398.517
sp|P26041|MOES_MOUSE	Msn	Moesin OS=Mus musculus OX=10090 GN=Msn PE=1 SV=3	642	9	C	UR	1010.42	703.868	582.643	839.651	1131.4	1433.64	462.227	2267.71	3084.03	3419.59	1720.98
sp|P26040|EZRI_MOUSE	Ezr	Ezrin OS=Mus musculus OX=10090 GN=Ezr PE=1 SV=3	642	20	C	UR	3626.15	3166.58	1464.86	3039.35	3976.68	2901.85	1064.35	5834.09	4284.52	4909.68	4986.36
sp|P26043|RADI_MOUSE	Rdx	Radixin OS=Mus musculus OX=10090 GN=Rdx PE=1 SV=3	642	1	C	UR	9.9148	16.3103	6.75996	18.4845	34.6832	14.7402	4.25288	66.5623	75.101	163.227	67.1444
sp|Q8BL97|SRSF7_MOUSE	Srsf7	Serine/arginine-rich splicing factor 7 OS=Mus musculus OX=10090 GN=Srsf7 PE=1 SV=1	643	4	C	UR	542.642	427.682	110.368	532.598	558.295	304.521	58.1597	674.222	778.261	657.288	724.087
sp|Q8BYW9|EOGT_MOUSE	Eogt	EGF domain-specific O-linked N-acetylglucosamine transferase OS=Mus musculus OX=10090 GN=Eogt PE=1 SV=1	644	3	C	UR	225.671	199.52	113.826	183.136	236.133	200.19	126.811	215.913	216.932	179.244	210.988
sp|Q9CWM4|PFD1_MOUSE	Pfdn1	Prefoldin subunit 1 OS=Mus musculus OX=10090 GN=Pfdn1 PE=1 SV=1	645	3	C	UR	1252.92	1160.78	66.9182	1153.52	2230.28	1067.44	50.6658	1519.94	1514.47	1608.09	1819.18
sp|Q9CWJ9|PUR9_MOUSE	Atic	Bifunctional purine biosynthesis protein ATIC OS=Mus musculus OX=10090 GN=Atic PE=1 SV=2	646	20	C	UR	2198.64	2595.81	3367.67	1860.51	3236.52	1708.41	4599.61	2574.56	1876.86	1766.49	2050.77
sp|Q9CW03|SMC3_MOUSE	Smc3	Structural maintenance of chromosomes protein 3 OS=Mus musculus OX=10090 GN=Smc3 PE=1 SV=2	647	27	C	UR	3573.06	3556.14	543.392	3768.16	2842.37	3507.85	499.755	3284.38	3865.61	3540.74	3106.38
sp|Q62351|TFR1_MOUSE	Tfrc	Transferrin receptor protein 1 OS=Mus musculus OX=10090 GN=Tfrc PE=1 SV=1	648	16	C	UR	1923.01	1699.5	9541.77	2413.98	980.759	1299.84	7992.31	1521.34	2324.44	1259.64	1322.73
sp|P25444|RS2_MOUSE	Rps2	40S ribosomal protein S2 OS=Mus musculus OX=10090 GN=Rps2 PE=1 SV=3	649	14	C	UR	2834.18	3106.48	2353.99	3782.26	2465.72	3265.57	2990.02	4195.72	3646.81	2682.45	3773.97
sp|Q9CYR6|AGM1_MOUSE	Pgm3	Phosphoacetylglucosamine mutase OS=Mus musculus OX=10090 GN=Pgm3 PE=1 SV=1	650	11	C	UR	1567.54	2102.29	406.01	1324.39	2418.3	1349.69	276.126	1535.59	1261.01	1174.92	1386.91
sp|P51174|ACADL_MOUSE	Acadl	Long-chain specific acyl-CoA dehydrogenase, mitochondrial OS=Mus musculus OX=10090 GN=Acadl PE=1 SV=2	651	11	C	UR	1406.44	1148.3	621.267	1182.7	1471.45	1029.75	697.894	1141.65	852.083	842.263	1171.77
sp|Q9QUR6|PPCE_MOUSE	Prep	Prolyl endopeptidase OS=Mus musculus OX=10090 GN=Prep PE=1 SV=1	652	21	C	UR	2104.13	2760.44	5223.5	1903.14	2848.21	1642.58	7072.63	2271.51	1848.96	1596.46	2180.32
sp|Q6ZPS6|AKIB1_MOUSE	Ankib1	Ankyrin repeat and IBR domain-containing protein 1 OS=Mus musculus OX=10090 GN=Ankib1 PE=1 SV=2	653	3	C	UR	52.0421	29.2059	40.98	49.4647	31.2827	43.4114	22.5381	45.6189	46.8617	46.6354	44.7942
sp|P97390|VPS45_MOUSE	Vps45	Vacuolar protein sorting-associated protein 45 OS=Mus musculus OX=10090 GN=Vps45 PE=1 SV=1	654	11	C	UR	1773.49	1678.51	544.626	1426.44	1751.61	1534.3	365.525	1530.91	1471.91	1378.83	1779.63
sp|Q711T7|NADE_MOUSE	Nadsyn1	Glutamine-dependent NAD(+) synthetase OS=Mus musculus OX=10090 GN=Nadsyn1 PE=1 SV=1	655	4	C	UR	255.306	188.058	61.6177	213.438	197.782	179.043	55.5272	162.482	157.222	129.687	135.004
sp|Q6P1B1|XPP1_MOUSE	Xpnpep1	Xaa-Pro aminopeptidase 1 OS=Mus musculus OX=10090 GN=Xpnpep1 PE=1 SV=1	656	10	C	UR	888.289	1101.02	412.511	663.349	1175.88	652.249	1053.39	817.963	713.37	690.974	832.242
sp|Q8VHC3|SELM_MOUSE	Selenom	Selenoprotein M OS=Mus musculus OX=10090 GN=Selenom PE=1 SV=3	657	2	C	UR	485.439	424.376	286.967	436.81	577.337	469.424	211.149	363.874	279.853	382.742	321.36
sp|Q8VDG5|PPCS_MOUSE	Ppcs	Phosphopantothenate--cysteine ligase OS=Mus musculus OX=10090 GN=Ppcs PE=1 SV=1	658	3	C	UR	762.493	524.236	82.0779	551.282	944.979	598.728	103.689	773.826	501.978	579.057	577.136
sp|Q3TJD7|PDLI7_MOUSE	Pdlim7	PDZ and LIM domain protein 7 OS=Mus musculus OX=10090 GN=Pdlim7 PE=1 SV=1	659	4	C	UR	103.803	75.0239	74.0312	166.971	61.7274	772.788	54.2403	155.205	240.433	573.074	182.02
sp|P48999|LOX5_MOUSE	Alox5	Polyunsaturated fatty acid 5-lipoxygenase OS=Mus musculus OX=10090 GN=Alox5 PE=1 SV=3	660	7	C	UR	315.796	361.659	1712.76	508.345	174.883	489.556	1956.28	212.428	381.247	504.075	243.62
sp|Q9R069|BCAM_MOUSE	Bcam	Basal cell adhesion molecule OS=Mus musculus OX=10090 GN=Bcam PE=1 SV=1	661	7	C	UR	420.708	559.898	591.024	580.304	505.067	2116.85	907.494	416.021	760.575	1235.73	307.786
sp|O08677-2|KNG1_MOUSE	Kng1	Isoform LMW of Kininogen-1 OS=Mus musculus OX=10090 GN=Kng1	662	12	C	UR	1153.31	863.257	789.031	751.712	1262.58	690.584	694.774	1186.35	1503.61	2665.99	1422.07
tr|Q6S9I3|Q6S9I3_MOUSE	Kng2	HMW kininogen-II OS=Mus musculus OX=10090 GN=Kng2 PE=1 SV=1	662	9	C	UR	1225.6	1159.87	220.984	946.278	1407.33	867.066	329.365	1035.97	1299.74	1868.77	1343.06
sp|Q3U0V2|TRADD_MOUSE	Tradd	Tumor necrosis factor receptor type 1-associated DEATH domain protein OS=Mus musculus OX=10090 GN=Tradd PE=1 SV=1	663	8	C	UR	1162.9	1028.95	604.798	1370.72	852.1	1376.25	404.012	1259.2	1304.65	1137.01	1065.54
sp|P14576|SRP54_MOUSE	Srp54	Signal recognition particle 54 kDa protein OS=Mus musculus OX=10090 GN=Srp54 PE=1 SV=2	664	4	C	UR	742.561	534.473	537.222	794.715	559.165	977.729	336.692	758.38	825.875	725.575	742.361
sp|P08249|MDHM_MOUSE	Mdh2	Malate dehydrogenase, mitochondrial OS=Mus musculus OX=10090 GN=Mdh2 PE=1 SV=3	665	14	C	UR	2818.95	3716.84	2029.55	2524.31	3639.13	1637.54	1539.25	2482.76	1748.68	2151.97	2703.9
sp|P14869|RLA0_MOUSE	Rplp0	60S acidic ribosomal protein P0 OS=Mus musculus OX=10090 GN=Rplp0 PE=1 SV=3	666	10	C	UR	2602.29	3245.88	919.904	3218.84	3520.87	2244.63	780.294	3307.38	2871.88	2303.44	3902.32
sp|Q9EPU0|RENT1_MOUSE	Upf1	Regulator of nonsense transcripts 1 OS=Mus musculus OX=10090 GN=Upf1 PE=1 SV=2	667	16	C	UR	2056.07	2168.08	1107.31	2314.4	1118.36	1959.35	1934.65	1557.4	2071.84	1662.25	1431.6
sp|O08784|TCOF_MOUSE	Tcof1	Treacle protein OS=Mus musculus OX=10090 GN=Tcof1 PE=1 SV=1	668	2	C	UR	32.6241	17.8467	52.8247	55.777	50.3135	18.7247	20.214	65.834	99.4857	125.615	84.1258
sp|Q9JLJ2|AL9A1_MOUSE	Aldh9a1	4-trimethylaminobutyraldehyde dehydrogenase OS=Mus musculus OX=10090 GN=Aldh9a1 PE=1 SV=1	669	12	C	UR	1648.06	1392.88	1458.15	1429.9	1920.17	1363.41	1112.16	1398.69	1755.92	1423.58	1285.69
sp|Q9D938|TM160_MOUSE	Tmem160	Transmembrane protein 160 OS=Mus musculus OX=10090 GN=Tmem160 PE=2 SV=1	670	1	C	UR	28.3301	27.749	247.73	23.2471	0	35.1149	250.817	12.0259	21.906	22.4639	11.8886
sp|P23780|BGAL_MOUSE	Glb1	Beta-galactosidase OS=Mus musculus OX=10090 GN=Glb1 PE=1 SV=1	671	8	C	UR	944.954	933.321	2529.09	870.239	1360.54	685.67	2113.66	802.767	664.375	588.318	941.056
sp|Q6PDJ6|FBX42_MOUSE	Fbxo42	F-box only protein 42 OS=Mus musculus OX=10090 GN=Fbxo42 PE=1 SV=1	672	3	C	UR	100.432	92.2968	62.4973	83.2438	89.7964	82.7497	87.8759	76.0826	77.4448	80.5901	72.0779
sp|P21447|MDR1A_MOUSE	Abcb1a	ATP-dependent translocase ABCB1 OS=Mus musculus OX=10090 GN=Abcb1a PE=1 SV=3	673	19	C	UR	5805.31	3633.35	3338.02	4804.13	3242.67	2799.77	2918.36	2713.75	2187.17	2066.3	2887.69
sp|Q923T9|KCC2G_MOUSE	Camk2g	Calcium/calmodulin-dependent protein kinase type II subunit gamma OS=Mus musculus OX=10090 GN=Camk2g PE=1 SV=1	674	4	C	UR	362.149	209.671	125.606	368.127	224.708	522.99	111.836	263.019	346.852	377.021	231.517
sp|Q6PHZ2|KCC2D_MOUSE	Camk2d	Calcium/calmodulin-dependent protein kinase type II subunit delta OS=Mus musculus OX=10090 GN=Camk2d PE=1 SV=1	674	6	C	UR	1505.92	1235.03	853.174	1324.59	787.503	1147.53	1119.54	656.02	801.529	831.494	751.364
sp|Q8CDN6|TXNL1_MOUSE	Txnl1	Thioredoxin-like protein 1 OS=Mus musculus OX=10090 GN=Txnl1 PE=1 SV=3	675	12	C	UR	2437.78	3272.75	406.156	2397.24	2786.12	2213.77	803.091	3020.67	2556.09	2969.78	3047.15
sp|Q8VCA8|SCRN2_MOUSE	Scrn2	Secernin-2 OS=Mus musculus OX=10090 GN=Scrn2 PE=1 SV=1	676	6	C	UR	726.82	1240.02	93.3687	446.676	942.734	473.292	104.887	844.348	696.353	764.125	812.876
sp|P32921|SYWC_MOUSE	Wars1	Tryptophan--tRNA ligase, cytoplasmic OS=Mus musculus OX=10090 GN=Wars1 PE=1 SV=2	677	19	C	UR	2370.71	2427.85	836.953	1897.86	4393.86	2260.86	729.215	4251.73	4180.52	3096.76	4343.85
sp|P10518|HEM2_MOUSE	Alad	Delta-aminolevulinic acid dehydratase OS=Mus musculus OX=10090 GN=Alad PE=1 SV=1	678	7	C	UR	909.183	998.855	580.456	569.312	1360.17	527.695	592.532	797.579	612.138	729.295	834.212
sp|B8ZXI1|QTRT2_MOUSE	Qtrt2	Queuine tRNA-ribosyltransferase accessory subunit 2 OS=Mus musculus OX=10090 GN=Qtrt2 PE=1 SV=2	680	5	C	UR	166.363	148.946	120.859	146.276	229.543	153.744	89.5677	167.749	178.941	139.862	153.345
sp|Q61425|HCDH_MOUSE	Hadh	Hydroxyacyl-coenzyme A dehydrogenase, mitochondrial OS=Mus musculus OX=10090 GN=Hadh PE=1 SV=2	681	10	C	UR	2035.17	1850.91	1516.02	1808.48	2520.24	1138.51	971.778	1562.04	1112.04	1170.88	1703.26
sp|Q01320|TOP2A_MOUSE	Top2a	DNA topoisomerase 2-alpha OS=Mus musculus OX=10090 GN=Top2a PE=1 SV=2	682	5	C	UR	575.269	941.701	777.045	1148.73	650.636	452.367	857.922	984.653	1737.62	802.564	808.724
sp|Q64511|TOP2B_MOUSE	Top2b	DNA topoisomerase 2-beta OS=Mus musculus OX=10090 GN=Top2b PE=1 SV=2	682	22	C	UR	2969.66	4163.32	3080.24	3533.83	2745.44	2904.11	4831.07	3509.84	4418.96	3309.5	3669.56
sp|Q3UVK0|ERMP1_MOUSE	Ermp1	Endoplasmic reticulum metallopeptidase 1 OS=Mus musculus OX=10090 GN=Ermp1 PE=1 SV=2	683	8	C	UR	729.534	430.858	2953.51	715.143	147.92	709.371	3213.84	515.86	774.49	805.364	515.551
sp|Q91XV3|BASP1_MOUSE	Basp1	Brain acid soluble protein 1 OS=Mus musculus OX=10090 GN=Basp1 PE=1 SV=3	684	4	C	UR	145.405	207.595	821.923	279.909	193.641	370.021	244.146	247.617	551.909	605.705	280.933
sp|Q99N94|RM09_MOUSE	Mrpl9	39S ribosomal protein L9, mitochondrial OS=Mus musculus OX=10090 GN=Mrpl9 PE=1 SV=2	685	3	C	UR	395.774	485.458	462.264	467.8	391.767	296.104	393.219	378.129	343.606	307.798	419.024
sp|Q8VI36|PAXI_MOUSE	Pxn	Paxillin OS=Mus musculus OX=10090 GN=Pxn PE=1 SV=1	686	5	C	UR	1139.55	633.09	599.156	1024.5	551.546	1767.3	399.372	1005.96	1270.07	1359.24	883.263
sp|Q99NF1|BCDO2_MOUSE	Bco2	Beta,beta-carotene 9',10'-oxygenase OS=Mus musculus OX=10090 GN=Bco2 PE=1 SV=1	687	5	C	UR	416.884	457.878	409.491	390.372	475.245	799.235	1162.12	869.608	767.653	437.182	747.227
sp|Q9D8V7|SC11C_MOUSE	Sec11c	Signal peptidase complex catalytic subunit SEC11C OS=Mus musculus OX=10090 GN=Sec11c PE=1 SV=3	688	3	C	UR	716.356	656.636	936.059	847.588	262.909	813.529	639.383	346.025	674.596	585.913	322.883
tr|E9Q512|E9Q512_MOUSE	Trip11	Thyroid hormone receptor interactor 11 OS=Mus musculus OX=10090 GN=Trip11 PE=1 SV=1	689	12	C	UR	2084.11	1261.4	350.346	1602.74	1751.57	1750	352.731	2389.6	2511.55	2784.07	2249.87
sp|P62737|ACTA_MOUSE	Acta2	Actin, aortic smooth muscle OS=Mus musculus OX=10090 GN=Acta2 PE=1 SV=1	690	42	C	UR	4979.75	6167.8	1944.02	6407.84	6868.76	9365	3405.09	6003.99	6241.71	6835.62	8027.8
tr|E9Q5F4|E9Q5F4_MOUSE	Actb	Actin, cytoplasmic 1 (Fragment) OS=Mus musculus OX=10090 GN=Actb PE=1 SV=1	690	2	C	UR	474.755	457.972	326.961	642.249	654.182	472.464	385.079	582.216	547.052	536.031	714.215
tr|F8WGM8|F8WGM8_MOUSE	Actg1	Actin, cytoplasmic 2 (Fragment) OS=Mus musculus OX=10090 GN=Actg1 PE=1 SV=1	690	6	C	UR	777.135	593.123	217.156	698.883	1005.83	775.165	501.761	841.23	702.677	642.95	1118.64
sp|Q8BFZ3|ACTBL_MOUSE	Actbl2	Beta-actin-like protein 2 OS=Mus musculus OX=10090 GN=Actbl2 PE=1 SV=1	690	3	C	UR	754.556	598.437	298.031	601.765	788.709	733.472	233.134	598.076	711.465	514.081	888.449
sp|Q5U458|DJC11_MOUSE	Dnajc11	DnaJ homolog subfamily C member 11 OS=Mus musculus OX=10090 GN=Dnajc11 PE=1 SV=2	691	4	C	UR	719.75	581.862	343.204	682.865	262.272	533.333	275.163	313.542	452.826	481.195	357.062
sp|Q9CQF9|PCYOX_MOUSE	Pcyox1	Prenylcysteine oxidase OS=Mus musculus OX=10090 GN=Pcyox1 PE=1 SV=1	692	11	C	UR	934.21	977.183	4338.32	1093.66	833.961	926.22	6442.23	769.521	718.909	759.514	831.473
sp|Q8K224|NAT10_MOUSE	Nat10	RNA cytidine acetyltransferase OS=Mus musculus OX=10090 GN=Nat10 PE=1 SV=1	693	10	C	UR	1058.75	1023.56	541.695	1498.9	737.264	1524.22	481.629	1317.45	1935.65	1410.49	1272.24
sp|Q9EPL4|METL9_MOUSE	Mettl9	Methyltransferase-like protein 9 OS=Mus musculus OX=10090 GN=Mettl9 PE=1 SV=1	694	2	C	UR	200.349	170.766	349.546	192.132	179.151	137.773	261.795	181.835	220.676	175.403	166.172
sp|Q08879-2|FBLN1_MOUSE	Fbln1	Isoform C of Fibulin-1 OS=Mus musculus OX=10090 GN=Fbln1	695	4	C	UR	284.928	332.436	700.441	329.859	285.767	736.886	613.385	307.961	531.131	707.511	310.745
sp|Q9D0K2|SCOT1_MOUSE	Oxct1	Succinyl-CoA:3-ketoacid coenzyme A transferase 1, mitochondrial OS=Mus musculus OX=10090 GN=Oxct1 PE=1 SV=1	696	12	C	UR	1534.74	1681.24	922.397	1753.7	2018.92	1432.19	565.678	2064.86	1439.42	1409.79	1942.31
sp|Q5SXY1|CYTSB_MOUSE	Specc1	Cytospin-B OS=Mus musculus OX=10090 GN=Specc1 PE=1 SV=2	697	3	C	UR	273.885	205.604	202.768	271.511	383.693	227.313	127.936	499.729	373.666	504.457	503.806
sp|Q8VDP4|CCAR2_MOUSE	Ccar2	Cell cycle and apoptosis regulator protein 2 OS=Mus musculus OX=10090 GN=Ccar2 PE=1 SV=2	698	8	C	UR	1263.83	781.307	526.103	1074.38	1230.11	1348.55	476.147	1842.02	1366.15	1593.39	1409.84
tr|E9QM38|E9QM38_MOUSE	Slc12a2	Solute carrier family 12 member 2 OS=Mus musculus OX=10090 GN=Slc12a2 PE=1 SV=1	699	11	C	UR	957.144	764.663	1480.28	1279.73	810.754	2313.76	1495.29	1206.14	1475.09	1601.52	1204.09
sp|Q8CHK3|MBOA7_MOUSE	Mboat7	Lysophospholipid acyltransferase 7 OS=Mus musculus OX=10090 GN=Mboat7 PE=1 SV=1	700	2	C	UR	70.6265	37.7001	52.6951	53.6225	11.2358	136.016	42.654	47.0141	94.9811	88.4327	36.8211
sp|Q9D1C9|RRP7A_MOUSE	Rrp7a	Ribosomal RNA-processing protein 7 homolog A OS=Mus musculus OX=10090 GN=Rrp7a PE=2 SV=1	701	3	C	UR	234.838	217.882	106.003	228.251	372.858	207.339	154.729	479.894	309.731	401.534	458.267
tr|Q3U2G2|Q3U2G2_MOUSE	Hspa4	Heat shock 70 kDa protein 4 OS=Mus musculus OX=10090 GN=Hspa4 PE=1 SV=1	702	15	C	UR	1615.59	1316.4	417.393	1326.14	3182	1589.75	366.817	3631.21	2697.68	2734.21	2811.09
sp|P48722|HS74L_MOUSE	Hspa4l	Heat shock 70 kDa protein 4L OS=Mus musculus OX=10090 GN=Hspa4l PE=1 SV=2	702	14	C	UR	1571.03	1100.41	854.848	1591.57	2115.96	1929.73	753.043	2993.58	2293.97	2462.94	2580.92
sp|O09061|PSB1_MOUSE	Psmb1	Proteasome subunit beta type-1 OS=Mus musculus OX=10090 GN=Psmb1 PE=1 SV=1	703	7	C	UR	937.81	1071.64	1492.15	811.404	1179.45	745.713	1623.05	1041.79	809.443	773.01	831.886
sp|P30933|SVS5_MOUSE	Svs5	Seminal vesicle secretory protein 5 OS=Mus musculus OX=10090 GN=Svs5 PE=2 SV=1	704	5	C	UR	57.6375	230.448	30.2004	29.0899	186.634	2017.34	44.0857	106.14	1031.38	27.4728	81.808
sp|Q02357-6|ANK1_MOUSE	Ank1	Isoform 6 of Ankyrin-1 OS=Mus musculus OX=10090 GN=Ank1	706	1	C	UR	259.995	109.646	96.6681	285.011	307.377	303.397	90.068	384.374	767.054	718.982	429.604
sp|P48281|VDR_MOUSE	Vdr	Vitamin D3 receptor OS=Mus musculus OX=10090 GN=Vdr PE=1 SV=2	707	6	C	UR	437.917	373.914	235.72	482.338	370.413	552.925	192.142	364.568	390	386.872	329.617
sp|Q8BGB2|TTC7A_MOUSE	Ttc7a	Tetratricopeptide repeat protein 7A OS=Mus musculus OX=10090 GN=Ttc7a PE=1 SV=1	708	2	C	UR	179.827	155.011	179.138	200.627	134.573	177.046	128.223	142.442	182.892	155.635	168.541
sp|Q99P88|NU155_MOUSE	Nup155	Nuclear pore complex protein Nup155 OS=Mus musculus OX=10090 GN=Nup155 PE=1 SV=1	709	3	C	UR	657.21	729.506	898.566	752.049	307.842	616.953	1543.5	356.821	514.556	489.74	419.635
sp|Q9CPQ1|COX6C_MOUSE	Cox6c	Cytochrome c oxidase subunit 6C OS=Mus musculus OX=10090 GN=Cox6c PE=1 SV=3	710	1	C	UR	292.071	269.768	224.188	221.259	105.042	147.157	121.571	155.265	174.514	186.633	127.893
sp|A1L314|MPEG1_MOUSE	Mpeg1	Macrophage-expressed gene 1 protein OS=Mus musculus OX=10090 GN=Mpeg1 PE=1 SV=1	711	7	C	UR	270.584	335.778	1272.27	450.767	188.142	386.807	1343.1	257.771	629.444	523.22	329.701
sp|Q61881|MCM7_MOUSE	Mcm7	DNA replication licensing factor MCM7 OS=Mus musculus OX=10090 GN=Mcm7 PE=1 SV=1	712	15	C	UR	1247.87	1154.74	533.062	1560.8	1346.24	1439.17	484.301	1732.77	2094.95	1706.26	1373.18
sp|Q8QZT1|THIL_MOUSE	Acat1	Acetyl-CoA acetyltransferase, mitochondrial OS=Mus musculus OX=10090 GN=Acat1 PE=1 SV=1	713	10	C	UR	1629.03	3652.58	278.517	1608.29	2598.07	1217.3	276.884	1811.87	1483.66	1587.63	2073.12
sp|P50247|SAHH_MOUSE	Ahcy	Adenosylhomocysteinase OS=Mus musculus OX=10090 GN=Ahcy PE=1 SV=3	714	15	C	UR	3648.52	6220.56	1565.11	2850.59	4454.55	3614.12	4700.61	3628.88	2977.87	2724.27	2983.44
sp|Q68FL4|SAHH3_MOUSE	Ahcyl2	Putative adenosylhomocysteinase 3 OS=Mus musculus OX=10090 GN=Ahcyl2 PE=1 SV=1	714	12	C	UR	2265.5	2645.75	1476.02	2018.09	1655.45	1795.49	1548.1	1672.65	1573.57	1493.18	1528.64
sp|Q80SW1|SAHH2_MOUSE	Ahcyl1	S-adenosylhomocysteine hydrolase-like protein 1 OS=Mus musculus OX=10090 GN=Ahcyl1 PE=1 SV=1	714	5	C	UR	339.286	325.422	268.014	307.04	258.325	340.075	232.819	261.415	335.873	283.552	296.916
sp|P49718|MCM5_MOUSE	Mcm5	DNA replication licensing factor MCM5 OS=Mus musculus OX=10090 GN=Mcm5 PE=1 SV=2	716	8	C	UR	930.645	861.209	295.535	1177.33	836.464	1068.51	332.535	1096.95	1416.02	1097.08	970.769
sp|P97310|MCM2_MOUSE	Mcm2	DNA replication licensing factor MCM2 OS=Mus musculus OX=10090 GN=Mcm2 PE=1 SV=3	717	7	C	UR	572.396	486.548	294.482	729.165	724.635	909.683	286.936	887.664	993.512	1003.19	725.856
sp|P13020|GELS_MOUSE	Gsn	Gelsolin OS=Mus musculus OX=10090 GN=Gsn PE=1 SV=3	718	20	C	UR	2353.65	3391.91	967.923	3156.21	4834.68	2519.09	1265.83	2875.7	2243.52	2855.24	3627.05
sp|Q8BI84|TGO1_MOUSE	Mia3	Transport and Golgi organization protein 1 homolog OS=Mus musculus OX=10090 GN=Mia3 PE=1 SV=2	719	20	C	UR	2560.88	2925.17	3091.25	3942.67	3717.52	2611.68	845.142	3091	2975.69	3267.17	2995.04
sp|O08914|FAAH1_MOUSE	Faah	Fatty-acid amide hydrolase 1 OS=Mus musculus OX=10090 GN=Faah PE=1 SV=1	720	4	C	UR	334.741	326.922	196.294	390.133	93.5554	303.461	416.907	179.811	338.381	239.789	159.948
sp|Q5FWI3|CEIP2_MOUSE	Cemip2	Cell surface hyaluronidase OS=Mus musculus OX=10090 GN=Cemip2 PE=1 SV=1	721	8	C	UR	620.748	728.121	2244.17	742.067	430.089	618.983	3357.78	627.66	652.058	539.915	703.768
sp|Q9WV98|TIM9_MOUSE	Timm9	Mitochondrial import inner membrane translocase subunit Tim9 OS=Mus musculus OX=10090 GN=Timm9 PE=1 SV=1	722	3	C	UR	478.16	371.59	167.28	385.051	571.104	296.296	93.0202	508.223	305.399	429.757	483.49
sp|Q99N85|RT18A_MOUSE	Mrps18a	28S ribosomal protein S18a, mitochondrial OS=Mus musculus OX=10090 GN=Mrps18a PE=2 SV=1	723	6	C	UR	1055.96	1430.31	1153.09	1522.45	1078.23	671.975	430.268	1134.9	829.305	709.326	1122.07
sp|Q9CZG9|PDZ11_MOUSE	Pdzd11	PDZ domain-containing protein 11 OS=Mus musculus OX=10090 GN=Pdzd11 PE=1 SV=1	724	4	C	UR	654.391	445.074	160.09	399.689	909.011	445.543	177.435	652.178	386.507	443.122	836.02
sp|P27661|H2AX_MOUSE	H2ax	Histone H2AX OS=Mus musculus OX=10090 GN=H2ax PE=1 SV=2	725	14	C	UR	2293.01	4372.66	358.006	3245.38	3280.31	2353.46	258.724	3731.39	3364.09	3543.25	2568.27
sp|Q8CGP7|H2A1K_MOUSE	H2ac15	Histone H2A type 1-K OS=Mus musculus OX=10090 GN=H2ac15 PE=1 SV=3	725	1	C	UR	118.488	126.981	0	106.743	138.837	113.962	0	123.523	134.246	166.699	125.47
sp|Q3THW5|H2AV_MOUSE	H2az2	Histone H2A.V OS=Mus musculus OX=10090 GN=H2az2 PE=1 SV=3	725	4	C	UR	1282.25	1744.84	99.1502	1341.68	2275.62	1288.32	119.721	1909.53	1474.99	1799.44	1776.79
sp|Q8BXQ2|PIGT_MOUSE	Pigt	GPI transamidase component PIG-T OS=Mus musculus OX=10090 GN=Pigt PE=1 SV=2	727	6	C	UR	982.108	867.912	2859.67	1178.96	399.795	1069.85	1610.96	559.311	815.159	681.158	599.688
sp|Q9QZZ6|DERM_MOUSE	Dpt	Dermatopontin OS=Mus musculus OX=10090 GN=Dpt PE=1 SV=1	729	3	C	UR	71.6895	78.3148	563.105	86.8651	35.5357	390.208	866.412	69.1703	167.521	357.804	29.9195
sp|Q9DCM2|GSTK1_MOUSE	Gstk1	Glutathione S-transferase kappa 1 OS=Mus musculus OX=10090 GN=Gstk1 PE=1 SV=3	730	6	C	UR	896.834	846.672	547.067	847.749	851.385	636.258	276.284	698.825	520.222	574.444	790.093
sp|P14148|RL7_MOUSE	Rpl7	60S ribosomal protein L7 OS=Mus musculus OX=10090 GN=Rpl7 PE=1 SV=2	731	9	C	UR	1024.68	2616.14	868.981	1981.63	1656.81	1241.39	523.685	5542.97	3113.88	3679.75	3795.44
sp|P67984|RL22_MOUSE	Rpl22	60S ribosomal protein L22 OS=Mus musculus OX=10090 GN=Rpl22 PE=1 SV=2	732	3	C	UR	177.483	254.936	144.765	213.381	229.158	155.266	122.518	240.521	251.916	182.991	230.014
sp|Q62120|JAK2_MOUSE	Jak2	Tyrosine-protein kinase JAK2 OS=Mus musculus OX=10090 GN=Jak2 PE=1 SV=2	733	2	C	UR	69.314	73.1878	58.4849	69.0324	38.5589	78.7866	43.4576	74.8686	78.5154	66.223	67.4121
tr|E9Q8I7|E9Q8I7_MOUSE	Nfxl1	Nuclear transcription factor, X-box-binding-like 1 OS=Mus musculus OX=10090 GN=Nfxl1 PE=1 SV=1	734	6	C	UR	595.389	346.204	246.179	567.259	214.947	712.387	139.035	397.23	657.676	559.704	315.528
sp|P29351-2|PTN6_MOUSE	Ptpn6	Isoform 2 of Tyrosine-protein phosphatase non-receptor type 6 OS=Mus musculus OX=10090 GN=Ptpn6	735	13	C	UR	1033.43	1075.76	471.053	1278.33	902.771	1515.29	717.873	1418.42	2191.14	2662.78	1363.11
sp|Q80YN3|BCAS1_MOUSE	Bcas1	Breast carcinoma-amplified sequence 1 homolog OS=Mus musculus OX=10090 GN=Bcas1 PE=1 SV=3	736	3	C	UR	195.593	220.086	268.474	240.469	408.06	134.593	118.225	254.131	254.928	251.235	408.579
sp|Q6NS46|RRP5_MOUSE	Pdcd11	Protein RRP5 homolog OS=Mus musculus OX=10090 GN=Pdcd11 PE=1 SV=2	737	4	C	UR	364.026	326.355	401.169	585.587	172.313	550.945	451.255	377.369	587.095	407.273	297.027
sp|P11672|NGAL_MOUSE	Lcn2	Neutrophil gelatinase-associated lipocalin OS=Mus musculus OX=10090 GN=Lcn2 PE=1 SV=1	738	5	C	UR	419.847	350.373	823.284	221.438	138.141	187.499	736.138	237.831	842.001	576.717	352.908
sp|Q8VDI9|ALG9_MOUSE	Alg9	Alpha-1,2-mannosyltransferase ALG9 OS=Mus musculus OX=10090 GN=Alg9 PE=2 SV=1	739	3	C	UR	49.5857	46.5175	120.494	68.3417	23.3446	55.0593	115.156	36.2457	44.4022	31.1085	26.5215
sp|E9PZJ8|ASCC3_MOUSE	Ascc3	Activating signal cointegrator 1 complex subunit 3 OS=Mus musculus OX=10090 GN=Ascc3 PE=1 SV=1	740	9	C	UR	1404.24	1096.35	368.743	1435.11	659.159	1503.56	514.443	975.135	1255.75	1022.94	924.595
sp|P47911|RL6_MOUSE	Rpl6	60S ribosomal protein L6 OS=Mus musculus OX=10090 GN=Rpl6 PE=1 SV=3	741	8	C	UR	1922.25	3222.78	831.457	3049.63	3002.67	1458.38	1480.06	5141.2	3778.02	3273.49	4930.33
sp|Q9QYB1|CLIC4_MOUSE	Clic4	Chloride intracellular channel protein 4 OS=Mus musculus OX=10090 GN=Clic4 PE=1 SV=3	742	4	C	UR	129.505	118.811	319.024	177.611	176.379	406.893	147.218	228.089	381.969	330.215	241.894
tr|V9GX76|V9GX76_MOUSE	Myo6	Unconventional myosin-VI OS=Mus musculus OX=10090 GN=Myo6 PE=1 SV=1	743	27	C	UR	5382.26	4730.83	2679.98	5590.97	4158.64	4129.92	1974.99	4977.92	5019.64	4190.71	5805.54
sp|Q8VCA5|TMPS4_MOUSE	Tmprss4	Transmembrane protease serine 4 OS=Mus musculus OX=10090 GN=Tmprss4 PE=2 SV=1	744	10	C	UR	982.034	906.618	2907	1056.95	731.853	524.964	4505.98	580.01	569.584	523.3	1003.44
sp|Q3TDQ1|STT3B_MOUSE	Stt3b	Dolichyl-diphosphooligosaccharide--protein glycosyltransferase subunit STT3B OS=Mus musculus OX=10090 GN=Stt3b PE=1 SV=2	745	4	C	UR	597.487	661.659	969.923	791.029	207.511	625.13	551.455	332.654	710.126	481.482	340.385
sp|O88455|DHCR7_MOUSE	Dhcr7	7-dehydrocholesterol reductase OS=Mus musculus OX=10090 GN=Dhcr7 PE=1 SV=1	746	2	C	UR	185.334	132.671	93.3391	231.866	30.8615	177.906	50.7381	73.4074	129.414	99.1458	63.6298
sp|Q9JHW2|NIT2_MOUSE	Nit2	Omega-amidase NIT2 OS=Mus musculus OX=10090 GN=Nit2 PE=1 SV=1	747	9	C	UR	1584.16	2007.55	704.651	1119.89	2374.58	1189.85	838.46	1324.32	1232.33	1139.97	1197.43
sp|Q3UYC0|PPM1H_MOUSE	Ppm1h	Protein phosphatase 1H OS=Mus musculus OX=10090 GN=Ppm1h PE=1 SV=1	748	3	C	UR	715.794	665.894	660.901	586.174	947.206	555.391	978.446	602.462	487.94	503.488	705.948
sp|O35350|CAN1_MOUSE	Capn1	Calpain-1 catalytic subunit OS=Mus musculus OX=10090 GN=Capn1 PE=1 SV=1	749	11	C	UR	1592.98	1523.11	1435.7	1440.45	1640.68	1140.18	1140.93	1222.05	1168.61	1019.06	1476.06
tr|M0QWP1|M0QWP1_MOUSE	Agrn	Agrin OS=Mus musculus OX=10090 GN=Agrn PE=1 SV=1	751	19	C	UR	1551.82	1505.13	660.803	1177.45	2221.69	1133.08	496.965	1150.51	960.363	1046.28	1007.28
sp|Q91V61|SFXN3_MOUSE	Sfxn3	Sideroflexin-3 OS=Mus musculus OX=10090 GN=Sfxn3 PE=1 SV=1	752	4	C	UR	372.211	255.244	472.165	334.2	98.2939	757.936	530.311	136.555	350.232	402.386	125.847
sp|Q91WG0|EST2C_MOUSE	Ces2c	Acylcarnitine hydrolase OS=Mus musculus OX=10090 GN=Ces2c PE=1 SV=1	753	14	C	UR	1605.51	1379.98	758.598	1011.79	1435.64	537.444	753.668	792.6	669.427	727.758	855.326
tr|E9PV38|E9PV38_MOUSE	Ces2g	Carboxylic ester hydrolase OS=Mus musculus OX=10090 GN=Ces2g PE=1 SV=1	753	1	C	UR	90.3117	131.603	127.378	104.137	171.301	47.5367	70.0083	74.3666	65.1301	58.7715	86.4329
tr|Q6PDB7|Q6PDB7_MOUSE	Ces2b	Carboxylic ester hydrolase OS=Mus musculus OX=10090 GN=Ces2b PE=1 SV=1	753	4	C	UR	1046.75	710.819	1369.69	678.013	650.229	259.449	677.382	500.588	329.046	357.397	426.562
sp|Q8BK48|EST2E_MOUSE	Ces2e	Pyrethroid hydrolase Ces2e OS=Mus musculus OX=10090 GN=Ces2e PE=1 SV=1	753	13	C	UR	3226.58	2696.93	3442.25	2684.9	2857.78	1129.41	3039.54	1968.6	1436	1395.06	1619.52
sp|Q8QZR3|EST2A_MOUSE	Ces2a	Pyrethroid hydrolase Ces2a OS=Mus musculus OX=10090 GN=Ces2a PE=1 SV=1	753	8	C	UR	2193.4	2361.12	668.037	1911.96	2442.84	787.437	929.789	1349.9	953.683	745.448	1221.3
sp|Q8CCK0|H2AW_MOUSE	Macroh2a2	Core histone macro-H2A.2 OS=Mus musculus OX=10090 GN=Macroh2a2 PE=1 SV=3	754	3	C	UR	273.626	261.382	90.946	244.282	296.355	422.478	93.39	354.5	457.802	432.955	272.065
sp|Q9QZQ8|H2AY_MOUSE	Macroh2a1	Core histone macro-H2A.1 OS=Mus musculus OX=10090 GN=Macroh2a1 PE=1 SV=3	754	7	C	UR	1024.5	1178.18	196.729	836.732	1546.17	892.96	337.169	1422.65	1174.63	1123.28	1403.95
sp|P50171-2|DHB8_MOUSE	Hsd17b8	Isoform Long of Estradiol 17-beta-dehydrogenase 8 OS=Mus musculus OX=10090 GN=Hsd17b8	755	4	C	UR	450.848	339.697	158.384	336.555	445.452	427.262	124.082	274.865	199.106	280.446	228.36
sp|Q9D009|LIPT2_MOUSE	Lipt2	Putative lipoyltransferase 2, mitochondrial OS=Mus musculus OX=10090 GN=Lipt2 PE=1 SV=2	756	2	C	UR	90.7817	78.2311	40.2233	50.9598	91.1403	66.1727	24.1093	77.8738	52.151	63.777	59.0123
sp|Q9CQE8|RTRAF_MOUSE	RTRAF	RNA transcription, translation and transport factor protein OS=Mus musculus OX=10090 GN=RTRAF PE=1 SV=1	757	4	C	UR	692.095	366.262	115.041	523.989	1065.11	617.639	78.2321	1328.95	804.459	1069.91	1072.24
sp|P12970|RL7A_MOUSE	Rpl7a	60S ribosomal protein L7a OS=Mus musculus OX=10090 GN=Rpl7a PE=1 SV=2	758	8	C	UR	1388.44	2972.26	177.175	2567.05	2059.58	1271.23	191.337	3517.63	3113.17	2909.89	3238.1
sp|Q8K2T8|PAF1_MOUSE	Paf1	RNA polymerase II-associated factor 1 homolog OS=Mus musculus OX=10090 GN=Paf1 PE=1 SV=1	760	4	C	UR	350.792	197.769	367.007	171.526	474.907	128.937	221.338	713.924	442.915	622.929	507.422
sp|P36552|HEM6_MOUSE	Cpox	Oxygen-dependent coproporphyrinogen-III oxidase, mitochondrial OS=Mus musculus OX=10090 GN=Cpox PE=1 SV=2	761	7	C	UR	422.199	506.659	1719.75	424.553	648.425	306.274	2098.04	466.781	381.848	382.576	468.776
sp|A2AFS3|ELAP1_MOUSE	Elapor1	Endosome/lysosome-associated apoptosis and autophagy regulator 1 OS=Mus musculus OX=10090 GN=Elapor1 PE=1 SV=1	762	16	C	UR	2357.76	1730.05	5471.25	2668.99	1186.78	2790.89	7403.71	1204.67	1341.89	1302.66	1075.18
sp|Q8R1G2|CMBL_MOUSE	Cmbl	Carboxymethylenebutenolidase homolog OS=Mus musculus OX=10090 GN=Cmbl PE=1 SV=1	763	10	C	UR	2997.79	2768.1	2458.3	1806.68	3214.83	1394.9	2519.01	1898.87	1342.46	1689.48	1884.35
sp|Q8CGK3|LONM_MOUSE	Lonp1	Lon protease homolog, mitochondrial OS=Mus musculus OX=10090 GN=Lonp1 PE=1 SV=2	764	7	C	UR	948.263	891.286	1091.02	998.26	538.658	792.138	461.219	542.579	659.562	690.375	564.078
sp|Q8C3K6|SC5A1_MOUSE	Slc5a1	Sodium/glucose cotransporter 1 OS=Mus musculus OX=10090 GN=Slc5a1 PE=1 SV=1	765	2	C	UR	86.2704	70.6658	139.739	61.9625	63.5393	51.8167	93.0293	44.4909	47.0435	41.1662	56.3416
sp|O70481|UBR1_MOUSE	Ubr1	E3 ubiquitin-protein ligase UBR1 OS=Mus musculus OX=10090 GN=Ubr1 PE=1 SV=2	766	3	C	UR	355.394	277.148	237.838	331.854	233.35	446.245	236.311	282.737	375.886	291.94	289.072
sp|Q6PB66|LPPRC_MOUSE	Lrpprc	Leucine-rich PPR motif-containing protein, mitochondrial OS=Mus musculus OX=10090 GN=Lrpprc PE=1 SV=2	767	18	C	UR	2607.67	2314.74	9419.44	2684.12	948.986	3108.31	5133.6	1673.11	1647.96	2016.49	1335.99
sp|Q61554|FBN1_MOUSE	Fbn1	Fibrillin-1 OS=Mus musculus OX=10090 GN=Fbn1 PE=1 SV=2	768	25	C	UR	453.376	662.971	7307.71	495.131	184.603	2422.01	7142.37	253.36	849.173	697.328	216.656
sp|Q61555|FBN2_MOUSE	Fbn2	Fibrillin-2 OS=Mus musculus OX=10090 GN=Fbn2 PE=1 SV=2	768	1	C	UR	5.14696	8.87766	53.5666	4.54134	5.22167	18.2184	12.1012	2.81242	9.02413	6.64771	3.27688
tr|J3QNU1|J3QNU1_MOUSE	Ate1	Arginyl-tRNA--protein transferase 1 OS=Mus musculus OX=10090 GN=Ate1 PE=1 SV=1	769	2	C	UR	554.928	468.934	131.85	546.274	331.384	688.324	84.6713	541.699	718.82	731.019	494.212
sp|Q99J09|MEP50_MOUSE	Wdr77	Methylosome protein 50 OS=Mus musculus OX=10090 GN=Wdr77 PE=1 SV=1	770	5	C	UR	282.725	340.455	100.245	221.527	469.489	180.481	82.056	418.533	311.467	377.233	361.269
sp|Q99LC2|CSTF1_MOUSE	Cstf1	Cleavage stimulation factor subunit 1 OS=Mus musculus OX=10090 GN=Cstf1 PE=1 SV=1	771	9	C	UR	1021.35	1035.45	517.016	960.551	861.411	809.886	608.058	838.454	884.681	869.839	839.463
sp|O88342|WDR1_MOUSE	Wdr1	WD repeat-containing protein 1 OS=Mus musculus OX=10090 GN=Wdr1 PE=1 SV=3	772	24	C	UR	4244.01	3191.85	1887.57	3149.23	4946.59	3037.36	4266.29	3342.17	2936.82	2639.3	3010.31
sp|P48453|PP2BB_MOUSE	Ppp3cb	Serine/threonine-protein phosphatase 2B catalytic subunit beta isoform OS=Mus musculus OX=10090 GN=Ppp3cb PE=1 SV=2	773	4	C	UR	357.636	374.631	576.954	362.186	375.227	329.633	389.192	355.689	368.875	324.52	349.242
sp|P42932|TCPQ_MOUSE	Cct8	T-complex protein 1 subunit theta OS=Mus musculus OX=10090 GN=Cct8 PE=1 SV=3	774	19	C	UR	3297	4703.95	712.941	4180.02	4317.61	3327.72	758.16	4409.32	4738.84	3880.66	4560.69
sp|P35585|AP1M1_MOUSE	Ap1m1	AP-1 complex subunit mu-1 OS=Mus musculus OX=10090 GN=Ap1m1 PE=1 SV=3	776	6	C	UR	858.798	679.066	318.642	754.527	1133.11	1260.27	377.988	1022.74	1168.17	1120.55	1240.61
sp|Q9WVP1-2|AP1M2_MOUSE	Ap1m2	Isoform 2 of AP-1 complex subunit mu-2 OS=Mus musculus OX=10090 GN=Ap1m2	776	9	C	UR	1907.75	1807.66	672.222	1842.3	1915.7	1376.54	663.275	1685.14	1437.05	1323.67	1847.73
sp|Q9WVP1|AP1M2_MOUSE	Ap1m2	AP-1 complex subunit mu-2 OS=Mus musculus OX=10090 GN=Ap1m2 PE=1 SV=3	776	1	C	UR	242.386	203.259	59.7463	212.138	263.955	213.073	36.8509	211.15	185.231	173.738	262.428
sp|P00688|AMYP_MOUSE	Amy2	Pancreatic alpha-amylase OS=Mus musculus OX=10090 GN=Amy2 PE=1 SV=2	777	17	C	UR	192.951	281.558	10464.2	497.899	171.562	140.111	5433.49	224.387	179.686	219.424	325.668
sp|P00687|AMY1_MOUSE	Amy1	Alpha-amylase 1 OS=Mus musculus OX=10090 GN=Amy1 PE=1 SV=2	777	16	C	UR	237.693	432.234	25075.4	564.647	126.5	188.232	8752.14	260.605	183.714	217.041	345.544
sp|P28665|MUG1_MOUSE	Mug1	Murinoglobulin-1 OS=Mus musculus OX=10090 GN=Mug1 PE=1 SV=3	778	15	C	UR	984.109	1357.21	2282.77	1108.99	920.731	922.956	2653.06	1392.94	1456.89	1701.76	1771.12
sp|Q60778|IKBB_MOUSE	Nfkbib	NF-kappa-B inhibitor beta OS=Mus musculus OX=10090 GN=Nfkbib PE=1 SV=2	779	1	C	UR	227.505	184.925	74.9674	246.977	248.293	274.408	65.4249	383.851	349.136	337.899	326.836
sp|P56480|ATPB_MOUSE	Atp5f1b	ATP synthase subunit beta, mitochondrial OS=Mus musculus OX=10090 GN=Atp5f1b PE=1 SV=2	780	17	C	UR	3884.11	3915.19	1577.12	4244.37	5289.98	2787.41	923.32	3778.58	2794.22	3536.7	3878.74
sp|Q9CYW4|HDHD3_MOUSE	Hdhd3	Haloacid dehalogenase-like hydrolase domain-containing protein 3 OS=Mus musculus OX=10090 GN=Hdhd3 PE=1 SV=1	781	5	C	UR	803.17	741.229	90.4578	589.991	805.154	449.575	87.4923	618.887	418.898	488.692	611.212
sp|Q91V76|CK054_MOUSE		Ester hydrolase C11orf54 homolog OS=Mus musculus OX=10090 PE=1 SV=1	782	12	C	UR	2164.92	2829.95	3588.49	1633.57	2634.02	1170.67	2269.83	1398.35	1065.28	1372.85	1146.51
sp|P62267|RS23_MOUSE	Rps23	40S ribosomal protein S23 OS=Mus musculus OX=10090 GN=Rps23 PE=1 SV=3	783	4	C	UR	1101.76	1306.85	584.717	1503.8	866.747	1195.77	477.051	1448.27	1643.88	1351.92	1280.09
sp|Q5SUA5|MYO1G_MOUSE	Myo1g	Unconventional myosin-Ig OS=Mus musculus OX=10090 GN=Myo1g PE=1 SV=1	784	5	C	UR	512.447	292.459	675.292	647.741	387.547	1175.98	757.145	621.569	1277.56	1272.83	644.336
sp|Q5SYD0|MYO1D_MOUSE	Myo1d	Unconventional myosin-Id OS=Mus musculus OX=10090 GN=Myo1d PE=1 SV=1	784	18	C	UR	3472.16	3182.64	2568.71	3682.17	2282.14	2952.6	2486.69	2771.01	2778.3	2333.07	3220.27
sp|A6H630|ARMT1_MOUSE	Armt1	Damage-control phosphatase ARMT1 OS=Mus musculus OX=10090 GN=Armt1 PE=1 SV=1	785	5	C	UR	463.381	637.6	211.869	442.474	722.485	415.041	398.254	581.089	474.362	451.736	486.999
tr|H3BJD6|H3BJD6_MOUSE	Ppp1r9a	Protein phosphatase 1, regulatory subunit 9A OS=Mus musculus OX=10090 GN=Ppp1r9a PE=1 SV=1	786	3	C	UR	377.432	288.055	55.8602	285.816	390.486	280.925	42.5022	316.131	268.096	322.181	311.61
sp|Q0VBM2|FA83B_MOUSE	Fam83b	Protein FAM83B OS=Mus musculus OX=10090 GN=Fam83b PE=2 SV=1	787	2	C	UR	924.553	896.098	1807.55	1134.06	491.327	837.389	1209.92	591.372	780.002	588.968	704.148
sp|P97384|ANX11_MOUSE	Anxa11	Annexin A11 OS=Mus musculus OX=10090 GN=Anxa11 PE=1 SV=2	788	15	C	UR	1167.44	1284.67	4932.04	1311.89	1113.89	983.099	5708.52	993.225	832.07	831.381	1163.99
sp|O35639|ANXA3_MOUSE	Anxa3	Annexin A3 OS=Mus musculus OX=10090 GN=Anxa3 PE=1 SV=4	788	12	C	UR	1347.74	1929.07	5071.19	1645.19	2231.45	945.477	5405.11	1731.03	1411.99	1478.75	3475.82
sp|Q7TMR0|PCP_MOUSE	Prcp	Lysosomal Pro-X carboxypeptidase OS=Mus musculus OX=10090 GN=Prcp PE=1 SV=2	789	5	C	UR	468.365	583.736	220.318	436.384	804.882	392.928	515.775	427.253	343.279	336.301	441.954
sp|P08775|RPB1_MOUSE	Polr2a	DNA-directed RNA polymerase II subunit RPB1 OS=Mus musculus OX=10090 GN=Polr2a PE=1 SV=3	790	10	C	UR	1429.72	1286.59	358.603	1300.4	1445.06	1858	387.105	1693.46	1770.37	1446.98	1287.6
sp|P08122|CO4A2_MOUSE	Col4a2	Collagen alpha-2(IV) chain OS=Mus musculus OX=10090 GN=Col4a2 PE=1 SV=4	791	15	C	UR	446.823	688.578	9284.88	427.818	85.6702	813.368	8695.64	239.376	509.98	362.715	213.725
tr|B1AVK5|B1AVK5_MOUSE	Col4a6	Collagen, type IV, alpha 6 OS=Mus musculus OX=10090 GN=Col4a6 PE=1 SV=1	791	2	C	UR	39.0985	67.8507	476.991	32.7769	15.3678	34.1844	265.864	15.7058	18.5931	14.7968	14.7937
sp|P11352|GPX1_MOUSE	Gpx1	Glutathione peroxidase 1 OS=Mus musculus OX=10090 GN=Gpx1 PE=1 SV=2	792	8	C	UR	1019.28	1225.41	3449.4	839.71	1204.77	829.204	2789.92	728.002	695.661	766.808	715.78
sp|P62309|RUXG_MOUSE	Snrpg	Small nuclear ribonucleoprotein G OS=Mus musculus OX=10090 GN=Snrpg PE=1 SV=1	793	1	C	UR	674.012	411.698	535.045	1166.71	540.093	330.696	1502.75	495.748	593.295	246.609	300.44
sp|Q61001|LAMA5_MOUSE	Lama5	Laminin subunit alpha-5 OS=Mus musculus OX=10090 GN=Lama5 PE=1 SV=4	794	11	C	UR	850.054	1161.74	1304.36	890.781	896.99	1591.83	2066.21	589.888	821.133	748.686	602.625
sp|P99029|PRDX5_MOUSE	Prdx5	Peroxiredoxin-5, mitochondrial OS=Mus musculus OX=10090 GN=Prdx5 PE=1 SV=2	795	8	C	UR	2509.6	1012.05	358.231	1077.3	2089.14	1484.94	277.784	1830.08	1395.3	1564.25	1408.17
sp|Q9CQR6|PPP6_MOUSE	Ppp6c	Serine/threonine-protein phosphatase 6 catalytic subunit OS=Mus musculus OX=10090 GN=Ppp6c PE=1 SV=1	796	7	C	UR	1341.33	1460.15	1334.73	1322.58	1649.38	1129.84	1527.43	1178.1	1270.08	1128.19	1486.62
sp|P62715|PP2AB_MOUSE	Ppp2cb	Serine/threonine-protein phosphatase 2A catalytic subunit beta isoform OS=Mus musculus OX=10090 GN=Ppp2cb PE=1 SV=1	797	12	C	UR	726.679	754.52	1011.45	604.901	778.562	560.346	1190.24	664.85	510.802	608.197	644.657
sp|P63330|PP2AA_MOUSE	Ppp2ca	Serine/threonine-protein phosphatase 2A catalytic subunit alpha isoform OS=Mus musculus OX=10090 GN=Ppp2ca PE=1 SV=1	797	3	C	UR	1061.64	1300.8	2789.24	1084	1277.68	898.474	2833.52	1224.98	853.566	1084.81	1048.86
sp|P97470|PP4C_MOUSE	Ppp4c	Serine/threonine-protein phosphatase 4 catalytic subunit OS=Mus musculus OX=10090 GN=Ppp4c PE=1 SV=2	797	9	C	UR	291.395	401.989	290.94	272.033	333.299	223.513	309.342	300.079	287.716	274.762	307.53
sp|O09044|SNP23_MOUSE	Snap23	Synaptosomal-associated protein 23 OS=Mus musculus OX=10090 GN=Snap23 PE=1 SV=1	798	7	C	UR	363.135	324.385	2131.91	458.228	271.303	355.122	1487.86	385.015	552.773	475.323	528.71
sp|P60879-2|SNP25_MOUSE	Snap25	Isoform 2 of Synaptosomal-associated protein 25 OS=Mus musculus OX=10090 GN=Snap25	798	2	C	UR	76.296	96.519	197.685	99.7986	56.3606	237.173	201.278	61.9019	96.4767	100.363	71.1933
sp|P62717|RL18A_MOUSE	Rpl18a	60S ribosomal protein L18a OS=Mus musculus OX=10090 GN=Rpl18a PE=1 SV=1	800	5	C	UR	983.644	1068.78	577.737	1223.2	651.414	1019.36	816.59	1105.28	1264.51	930.245	1206.18
sp|Q8CFA2|GCST_MOUSE	Amt	Aminomethyltransferase, mitochondrial OS=Mus musculus OX=10090 GN=Amt PE=1 SV=1	801	5	C	UR	1282.23	1641.63	1534.99	1141.54	1307.93	1064.41	735.72	1125.11	820.791	819.017	913.898
sp|P09411|PGK1_MOUSE	Pgk1	Phosphoglycerate kinase 1 OS=Mus musculus OX=10090 GN=Pgk1 PE=1 SV=4	802	11	C	UR	1149.01	2000.86	691.155	1035.01	2149.92	729.073	1239.37	1537	1439.39	1088.68	1243.77
sp|P09041|PGK2_MOUSE	Pgk2	Phosphoglycerate kinase 2 OS=Mus musculus OX=10090 GN=Pgk2 PE=1 SV=4	802	5	C	UR	516.817	700.681	180.291	348.014	865.912	387.259	292.193	615.668	377.171	357.271	567.67
sp|Q8CFI0|NED4L_MOUSE	Nedd4l	E3 ubiquitin-protein ligase NEDD4-like OS=Mus musculus OX=10090 GN=Nedd4l PE=1 SV=2	803	8	C	UR	616.847	601.656	942.965	745.4	508.208	756.621	993.815	455.123	511.129	424.195	472.982
sp|P46935|NEDD4_MOUSE	Nedd4	E3 ubiquitin-protein ligase NEDD4 OS=Mus musculus OX=10090 GN=Nedd4 PE=1 SV=3	803	7	C	UR	748.326	721.685	1580.43	898.932	693.077	832.902	1230.71	622.422	893.516	744.777	632.247
sp|A2A5Z6|SMUF2_MOUSE	Smurf2	E3 ubiquitin-protein ligase SMURF2 OS=Mus musculus OX=10090 GN=Smurf2 PE=1 SV=1	803	3	C	UR	90.3383	91.9357	269.78	96.7082	70.3406	98.6762	311.487	66.6366	77.6859	66.9198	81.5451
sp|P61202-2|CSN2_MOUSE	Cops2	Isoform 2 of COP9 signalosome complex subunit 2 OS=Mus musculus OX=10090 GN=Cops2	804	9	C	UR	1444.57	1295.14	726.483	1264.33	1410.16	1593.94	507.743	1376.16	1424.62	1398.14	1407.86
sp|Q91ZJ5|UGPA_MOUSE	Ugp2	UTP--glucose-1-phosphate uridylyltransferase OS=Mus musculus OX=10090 GN=Ugp2 PE=1 SV=3	805	14	C	UR	3542.03	4496.22	1688.53	3516.96	4868.29	2829.28	1352.5	3496.2	2909.35	2640.52	2967.77
sp|Q01853|TERA_MOUSE	Vcp	Transitional endoplasmic reticulum ATPase OS=Mus musculus OX=10090 GN=Vcp PE=1 SV=4	806	26	C	UR	2284.49	3014.56	901.669	2508.15	4885.43	2499.87	1355.12	4210.44	3525.99	3477.31	4077.07
sp|P26231|CTNA1_MOUSE	Ctnna1	Catenin alpha-1 OS=Mus musculus OX=10090 GN=Ctnna1 PE=1 SV=1	807	16	C	UR	3967.6	3028.57	2883.1	4258.65	2837.2	3054.98	2040.08	3509.53	3814.73	3389.63	4206.66
sp|Q61301|CTNA2_MOUSE	Ctnna2	Catenin alpha-2 OS=Mus musculus OX=10090 GN=Ctnna2 PE=1 SV=3	807	3	C	UR	413.124	186.144	258.518	597.51	350.068	212.869	246.549	349.043	347.166	305.573	362.918
sp|P01899|HA11_MOUSE	H2-D1	H-2 class I histocompatibility antigen, D-B alpha chain OS=Mus musculus OX=10090 GN=H2-D1 PE=1 SV=2	808	8	C	UR	1216.01	465.501	1623.44	858.262	602.293	1346.4	2703.95	839.063	1114.48	1063.25	826.675
sp|P06339|HA15_MOUSE	H2-T23	H-2 class I histocompatibility antigen, D-37 alpha chain OS=Mus musculus OX=10090 GN=H2-T23 PE=1 SV=1	808	4	C	UR	228.881	155.659	340.794	174.369	149.995	192.832	399.573	188.117	202.451	194.682	153.733
sp|P14429|HA17_MOUSE	H2-Q7	H-2 class I histocompatibility antigen, Q7 alpha chain OS=Mus musculus OX=10090 GN=H2-Q7 PE=1 SV=1	808	2	C	UR	113.138	65.7572	534.85	91.8373	113.799	164.986	1090.7	180.924	184.657	182.288	139.35
sp|P01901|HA1B_MOUSE	H2-K1	H-2 class I histocompatibility antigen, K-B alpha chain OS=Mus musculus OX=10090 GN=H2-K1 PE=1 SV=1	808	11	C	UR	834.962	472.571	1553.15	637.478	650.915	767.727	2584.59	694.478	582.937	659.811	544.919
sp|P01898|HA10_MOUSE	H2-Q10	H-2 class I histocompatibility antigen, Q10 alpha chain OS=Mus musculus OX=10090 GN=H2-Q10 PE=1 SV=3	808	1	C	UR	16.9927	30.3091	6.34919	16.3898	19.6623	9.33871	8.98199	17.0235	17.2529	27.5	15.5781
tr|Q8HWB2|Q8HWB2_MOUSE	H2-Q4	Histocompatibility 2, Q region locus 4 OS=Mus musculus OX=10090 GN=H2-Q4 PE=1 SV=1	808	3	C	UR	166.645	117.914	387.049	129.375	191.156	146.598	607.679	184.231	265.171	220.207	201.687
tr|Q05A75|Q05A75_MOUSE	H2-T3	H-2 class I histocompatibility antigen, TLA(B) alpha chain OS=Mus musculus OX=10090 GN=H2-T3 PE=1 SV=1	808	2	C	UR	133.756	74.2294	198.937	98.3543	79.1513	81.2719	261.216	82.4682	56.36	71.3504	74.139
sp|Q8K0E8|FIBB_MOUSE	Fgb	Fibrinogen beta chain OS=Mus musculus OX=10090 GN=Fgb PE=1 SV=1	809	24	C	UR	1415.37	3289.6	3808.55	3501.07	703.812	1628.6	6018.66	797.189	2411.55	3859.7	1551
sp|P14152|MDHC_MOUSE	Mdh1	Malate dehydrogenase, cytoplasmic OS=Mus musculus OX=10090 GN=Mdh1 PE=1 SV=3	810	15	C	UR	2620.99	4014	3705.75	2429.91	3117.09	2052.54	4825.46	2253.7	1918.88	1783.02	1965.64
sp|P63005|LIS1_MOUSE	Pafah1b1	Platelet-activating factor acetylhydrolase IB subunit alpha OS=Mus musculus OX=10090 GN=Pafah1b1 PE=1 SV=2	811	10	C	UR	1466.31	1371.72	1020.58	1185.17	1753.94	1137.33	1654.62	1392.32	1151.91	1155.89	1393.07
sp|Q9D1Q6|ERP44_MOUSE	Erp44	Endoplasmic reticulum resident protein 44 OS=Mus musculus OX=10090 GN=Erp44 PE=1 SV=1	811	8	C	UR	999.338	1466.89	735.701	1377.17	1584.75	720.805	488.52	1085.79	1106.73	1097.17	1246.56
sp|Q8VC03|EMAL3_MOUSE	Eml3	Echinoderm microtubule-associated protein-like 3 OS=Mus musculus OX=10090 GN=Eml3 PE=1 SV=1	812	4	C	UR	401.519	362.482	175.181	396.297	338.49	473.156	129.989	388.175	397.162	352.744	324.107
sp|P22315|HEMH_MOUSE	Fech	Ferrochelatase, mitochondrial OS=Mus musculus OX=10090 GN=Fech PE=1 SV=2	813	5	C	UR	1059.54	1316.42	1003.54	1070.67	1143.28	994.036	2275.68	661.766	582.583	677.946	685.429
sp|Q9Z0S1|BPNT1_MOUSE	Bpnt1	3'(2'),5'-bisphosphate nucleotidase 1 OS=Mus musculus OX=10090 GN=Bpnt1 PE=1 SV=2	814	11	C	UR	2211.43	2759.07	3681.21	1687.11	2366.47	1332.59	3378.25	1542.83	1266.28	1269.27	1564.1
tr|A0A1B0GRV0|A0A1B0GRV0_MOUSE	Bpnt1	3'(2'),5'-bisphosphate nucleotidase 1 OS=Mus musculus OX=10090 GN=Bpnt1 PE=1 SV=1	814	1	C	UR	16.937	10.3447	17.633	10.6875	15.7023	16.0649	12.5552	12.3397	6.84441	10.5805	15.5177
sp|Q62383|SPT6H_MOUSE	Supt6h	Transcription elongation factor SPT6 OS=Mus musculus OX=10090 GN=Supt6h PE=1 SV=2	815	11	C	UR	2018.23	1900.54	459.958	1933.67	1803.17	1897.01	490.12	1985.82	2007.23	1658.1	1769.78
sp|P97427|DPYL1_MOUSE	Crmp1	Dihydropyrimidinase-related protein 1 OS=Mus musculus OX=10090 GN=Crmp1 PE=1 SV=1	816	4	C	UR	284.562	323.245	153.499	255.332	331.206	613.047	136.874	284.367	389.109	368.935	283.704
tr|E9PWE8|E9PWE8_MOUSE	Dpysl3	Dihydropyrimidinase-related protein 3 OS=Mus musculus OX=10090 GN=Dpysl3 PE=1 SV=1	816	7	C	UR	744.925	466.51	133.581	510.114	820.149	1872.73	169.079	981.531	1231.11	1530.71	837.523
sp|O08553|DPYL2_MOUSE	Dpysl2	Dihydropyrimidinase-related protein 2 OS=Mus musculus OX=10090 GN=Dpysl2 PE=1 SV=2	816	11	C	UR	1583.06	1662.94	200.237	1134.67	2426.63	2473.08	428.394	1638.28	1986.86	1899.33	1706.45
sp|P56389|CDD_MOUSE	Cda	Cytidine deaminase OS=Mus musculus OX=10090 GN=Cda PE=1 SV=2	817	3	C	UR	289.641	547.064	39.1791	257.893	316.071	99.8133	68.093	153.849	165.564	149.804	147.716
sp|O70228|ATP9A_MOUSE	Atp9a	Probable phospholipid-transporting ATPase IIA OS=Mus musculus OX=10090 GN=Atp9a PE=1 SV=3	818	3	C	UR	248.287	213.868	806.108	298.637	121.306	227.803	723.537	142.552	208.601	157.419	151.828
tr|F8VQ05|F8VQ05_MOUSE	Fryl	FRY-like transcription coactivator OS=Mus musculus OX=10090 GN=Fryl PE=1 SV=1	819	7	C	UR	788.628	459.944	664.857	715.97	472.081	1006.09	579.972	739.538	789.493	726.851	647.215
sp|E9Q8I9-2|FRY_MOUSE	Fry	Isoform 2 of Protein furry homolog OS=Mus musculus OX=10090 GN=Fry	819	2	C	UR	109.783	108.697	196.506	121.828	80.3229	180.478	119.202	92.7153	151.359	136.171	94.9688
sp|P63154|CRNL1_MOUSE	Crnkl1	Crooked neck-like protein 1 OS=Mus musculus OX=10090 GN=Crnkl1 PE=1 SV=1	820	1	C	UR	39.1222	28.8785	11.597	44.4196	21.4072	41.6761	21.6023	39.3813	40.7793	34.5353	27.7038
sp|Q9DC69|NDUA9_MOUSE	Ndufa9	NADH dehydrogenase [ubiquinone] 1 alpha subcomplex subunit 9, mitochondrial OS=Mus musculus OX=10090 GN=Ndufa9 PE=1 SV=2	821	6	C	UR	886.256	733.239	2111.7	799.034	422.082	752.981	997.974	397.911	420.857	504.001	448.953
sp|Q8VCC2|EST1_MOUSE	Ces1	Liver carboxylesterase 1 OS=Mus musculus OX=10090 GN=Ces1 PE=1 SV=1	822	11	C	UR	2426.02	2061.08	2985.39	2346.94	2359.03	1435.42	2845.07	2013.96	1050.6	1186.87	1727.74
sp|Q91WU0|EST1F_MOUSE	Ces1f	Carboxylesterase 1F OS=Mus musculus OX=10090 GN=Ces1f PE=1 SV=1	822	18	C	UR	2685.93	2867.93	2283.93	2833.82	3117.67	1936.82	3686.33	2528.63	1619.11	2192.05	1719.59
sp|Q64176|EST1E_MOUSE	Ces1e	Carboxylesterase 1E OS=Mus musculus OX=10090 GN=Ces1e PE=1 SV=1	822	3	C	UR	483.752	433.347	535.797	445.223	662.341	312.145	330.539	433.361	291.159	335.484	370.752
sp|Q9R0M8|S35A2_MOUSE	Slc35a2	UDP-galactose translocator OS=Mus musculus OX=10090 GN=Slc35a2 PE=1 SV=1	823	2	C	UR	326.012	105.85	374.17	212.528	227.636	623.394	307.72	231.985	164.144	281.75	124.97
sp|Q62469|ITA2_MOUSE	Itga2	Integrin alpha-2 OS=Mus musculus OX=10090 GN=Itga2 PE=1 SV=2	824	14	C	UR	1632.39	1300.85	3667.49	1672.63	1265.18	1254.76	3941.66	1114.81	871.472	919.26	1194.35
sp|Q8CJG0|AGO2_MOUSE	Ago2	Protein argonaute-2 OS=Mus musculus OX=10090 GN=Ago2 PE=1 SV=3	825	7	C	UR	538.782	453.953	185.032	439.929	425.432	602.536	244.45	403.443	456.685	414.297	442.227
sp|Q8CJG1|AGO1_MOUSE	Ago1	Protein argonaute-1 OS=Mus musculus OX=10090 GN=Ago1 PE=1 SV=2	825	6	C	UR	381.239	327.903	166.125	312.28	332.342	408.784	162.555	277.901	331.771	309.973	297.314
sp|Q8BIP0|SYDM_MOUSE	Dars2	Aspartate--tRNA ligase, mitochondrial OS=Mus musculus OX=10090 GN=Dars2 PE=1 SV=1	826	8	C	UR	833.735	725.468	761.711	825.637	984.749	623.241	800.543	736.299	622.933	543.22	809.626
sp|Q8C5W0|CLMN_MOUSE	Clmn	Calmin OS=Mus musculus OX=10090 GN=Clmn PE=1 SV=2	827	3	C	UR	490.616	421.745	225.88	592.767	545.802	541.708	196.507	658.227	593.686	558.536	728.883
sp|P35505|FAAA_MOUSE	Fah	Fumarylacetoacetase OS=Mus musculus OX=10090 GN=Fah PE=1 SV=2	828	5	C	UR	275.249	313.592	548.106	237.23	326.664	224.325	796.31	216.563	218.26	274.533	182.583
sp|Q9QY33|TSN3_MOUSE	Tspan3	Tetraspanin-3 OS=Mus musculus OX=10090 GN=Tspan3 PE=1 SV=1	829	2	C	UR	150.113	148.798	827.868	192.572	95.8663	95.0127	952.666	81.6166	99.3382	86.9278	112.314
sp|Q9DBC0|SELO_MOUSE	Selenoo	Protein adenylyltransferase SelO, mitochondrial OS=Mus musculus OX=10090 GN=Selenoo PE=1 SV=4	830	3	C	UR	357.676	283.562	114.673	280.1	317.909	372.953	84.442	295.392	273.634	287.824	276.607
sp|O08692|NGP_MOUSE	Ngp	Neutrophilic granule protein OS=Mus musculus OX=10090 GN=Ngp PE=1 SV=1	831	3	C	UR	207.34	120.336	148.101	177.433	108.9	152.216	71.2606	113.186	471.176	353.912	224.391
sp|D3YXK2|SAFB1_MOUSE	Safb	Scaffold attachment factor B1 OS=Mus musculus OX=10090 GN=Safb PE=1 SV=2	832	3	C	UR	304.84	212.173	96.2013	336.427	382.799	448.304	61.2006	1054.67	981.042	1414.27	858.277
sp|Q8BWM0|PGES2_MOUSE	Ptges2	Prostaglandin E synthase 2 OS=Mus musculus OX=10090 GN=Ptges2 PE=1 SV=3	833	7	C	UR	2069.51	1662.48	2030.39	1852.94	1227.06	1660.84	2707.38	1254.21	970.964	1184.86	1328.96
sp|O70310|NMT1_MOUSE	Nmt1	Glycylpeptide N-tetradecanoyltransferase 1 OS=Mus musculus OX=10090 GN=Nmt1 PE=1 SV=1	834	3	C	UR	303.455	312.124	179.807	290.805	314.526	288.552	806.301	435.442	290.478	309.25	327.795
sp|O70311|NMT2_MOUSE	Nmt2	Glycylpeptide N-tetradecanoyltransferase 2 OS=Mus musculus OX=10090 GN=Nmt2 PE=1 SV=1	834	2	C	UR	183.321	272.62	200.311	198.69	211.68	167.791	197.009	223.786	268.518	201.158	213.577
sp|Q9EQJ9|MAGI3_MOUSE	Magi3	Membrane-associated guanylate kinase, WW and PDZ domain-containing protein 3 OS=Mus musculus OX=10090 GN=Magi3 PE=1 SV=2	835	3	C	UR	423.539	484.041	242.588	376.937	458.495	306.739	415.759	373.198	325.255	354.373	385.94
tr|F8VQC1|F8VQC1_MOUSE	Srp72	Signal recognition particle subunit SRP72 OS=Mus musculus OX=10090 GN=Srp72 PE=1 SV=1	836	7	C	UR	1094.11	438.467	360.096	952.142	668.407	1501.8	290.822	951.842	935.716	1007.43	853.751
sp|Q9D7X8|GGCT_MOUSE	Ggct	Gamma-glutamylcyclotransferase OS=Mus musculus OX=10090 GN=Ggct PE=1 SV=1	837	2	C	UR	87.1151	97.1534	240.336	78.8188	96.0461	62.3809	307.706	97.579	65.7098	65.8885	79.3118
sp|Q8CI32|BAG5_MOUSE	Bag5	BAG family molecular chaperone regulator 5 OS=Mus musculus OX=10090 GN=Bag5 PE=1 SV=1	838	3	C	UR	111.715	99.9445	25.1108	101.223	145.35	160.326	16.8274	159.645	150.292	149.419	126.521
sp|P61967|AP1S1_MOUSE	Ap1s1	AP-1 complex subunit sigma-1A OS=Mus musculus OX=10090 GN=Ap1s1 PE=1 SV=1	839	1	C	UR	48.4614	56.3345	5.61962	68.6577	72.516	58.569	6.6208	82.6594	72.2153	64.7165	74.0432
sp|Q60870|REEP5_MOUSE	Reep5	Receptor expression-enhancing protein 5 OS=Mus musculus OX=10090 GN=Reep5 PE=1 SV=1	840	2	C	UR	135.334	133.346	2128.3	227.096	20.1474	312.961	1348.94	103.702	172.74	139.568	90.9266
sp|Q9D2Q8|S10AE_MOUSE	S100a14	Protein S100-A14 OS=Mus musculus OX=10090 GN=S100a14 PE=1 SV=1	841	3	C	UR	359.733	659.375	785.149	738.801	323.534	284.369	259.095	433.857	600.299	292.039	1015.31
sp|Q922L6|NELFD_MOUSE	Nelfcd	Negative elongation factor D OS=Mus musculus OX=10090 GN=Nelfcd PE=1 SV=2	842	1	C	UR	177.64	95.6714	36.059	212.604	143.337	391.534	48.7106	246.473	176.81	239.247	141.827
sp|O55142|RL35A_MOUSE	Rpl35a	60S ribosomal protein L35a OS=Mus musculus OX=10090 GN=Rpl35a PE=1 SV=2	843	5	C	UR	591.38	694.671	898.239	772.855	683.983	522.23	1076.39	745.916	643.308	506.491	726.452
sp|Q9CR42|ANKR1_MOUSE	Ankrd1	Ankyrin repeat domain-containing protein 1 OS=Mus musculus OX=10090 GN=Ankrd1 PE=1 SV=1	844	2	C	UR	136.256	348.781	1627.26	651.954	968.372	203.347	448.493	59.3901	97.8911	122.064	167.901
sp|Q9WUM4|COR1C_MOUSE	Coro1c	Coronin-1C OS=Mus musculus OX=10090 GN=Coro1c PE=1 SV=2	845	10	C	UR	2644.15	2641.55	887.289	2037.69	3328.28	2533.16	604.889	2778.13	2395.02	2490.13	3036.91
sp|O89053|COR1A_MOUSE	Coro1a	Coronin-1A OS=Mus musculus OX=10090 GN=Coro1a PE=1 SV=5	845	7	C	UR	779.948	789.567	280.389	926.921	1902.18	1538.65	306.196	2171.56	2446.62	2810.47	1753.62
sp|Q9DCD0|6PGD_MOUSE	Pgd	6-phosphogluconate dehydrogenase, decarboxylating OS=Mus musculus OX=10090 GN=Pgd PE=1 SV=3	846	12	C	UR	2696.85	4748.11	780.982	2836.39	3364.83	2329.58	1159.36	3353.75	2862.52	2430.17	3265.53
tr|Q9WUR0|Q9WUR0_MOUSE	Tinag	Tubulo-interstitial nephritis antigen OS=Mus musculus OX=10090 GN=Tinag PE=1 SV=1	847	4	C	UR	129.544	188.99	255.744	135.053	215.883	72.4649	360.239	61.7864	72.2286	52.4873	65.8046
sp|P07339|CATD_HUMAN_contaminant	CTSD	Cathepsin D OS=Homo sapiens GN=CTSD PE=1 SV=1	848	4	C	UR	132.264	204.63	514.703	156.783	221.727	123.062	427.871	141.307	143.99	168.564	147.329
sp|P18242|CATD_MOUSE	Ctsd	Cathepsin D OS=Mus musculus OX=10090 GN=Ctsd PE=1 SV=1	848	10	C	UR	1605.25	1569.19	2123.91	1265.86	1924.42	1031.43	2162.03	1201.66	872.461	1215.63	1205.83
sp|Q8BJU0|SGTA_MOUSE	Sgta	Small glutamine-rich tetratricopeptide repeat-containing protein alpha OS=Mus musculus OX=10090 GN=Sgta PE=1 SV=2	849	6	C	UR	1599.15	1990.69	80.6639	1472.35	1552.61	1113.02	65.3683	1888.88	1728.22	1708.43	1753.66
sp|P12710|FABPL_MOUSE	Fabp1	Fatty acid-binding protein, liver OS=Mus musculus OX=10090 GN=Fabp1 PE=1 SV=2	850	2	C	UR	83.6494	37.0864	71.1128	28.86	32.3321	18.0158	38.4855	20.7518	18.1159	15.9696	19.149
sp|Q99PI5|LPIN2_MOUSE	Lpin2	Phosphatidate phosphatase LPIN2 OS=Mus musculus OX=10090 GN=Lpin2 PE=1 SV=2	851	3	C	UR	242.447	174.066	123.094	214.097	131.254	214.572	118.881	150.359	193.888	179.526	163.052
sp|Q9JLZ3|AUHM_MOUSE	Auh	Methylglutaconyl-CoA hydratase, mitochondrial OS=Mus musculus OX=10090 GN=Auh PE=1 SV=1	852	2	C	UR	332.938	281.402	144.655	267.497	422.555	210.614	86.8996	248.072	201.24	208.462	296.174
sp|Q9DCX2|ATP5H_MOUSE	Atp5pd	ATP synthase subunit d, mitochondrial OS=Mus musculus OX=10090 GN=Atp5pd PE=1 SV=3	853	7	C	UR	927.785	554.822	125.629	1713.36	1384.31	639.136	128.182	932.396	762.329	615.346	695.374
sp|Q9Z2U1|PSA5_MOUSE	Psma5	Proteasome subunit alpha type-5 OS=Mus musculus OX=10090 GN=Psma5 PE=1 SV=1	855	12	C	UR	590.791	726.243	773.604	465.849	808.849	405.722	1204.13	621.819	502.711	532.167	538.763
sp|Q64516|GLPK_MOUSE	Gk	Glycerol kinase OS=Mus musculus OX=10090 GN=Gk PE=1 SV=2	856	10	C	UR	1097.75	2082.09	3069.08	1329.73	1359.78	1219.25	3187.1	1050.8	1202.33	800.255	2028.07
sp|O88441|MTX2_MOUSE	Mtx2	Metaxin-2 OS=Mus musculus OX=10090 GN=Mtx2 PE=1 SV=1	857	7	C	UR	1302.42	1390.94	3065.61	1277.68	1104.56	1024.82	3489.09	809.97	688.6	815.25	1029.91
sp|Q6P2B1-2|TNPO3_MOUSE	Tnpo3	Isoform 2 of Transportin-3 OS=Mus musculus OX=10090 GN=Tnpo3	858	3	C	UR	454.951	321.636	332.04	481.764	341.681	580.582	323.434	408.931	479.639	432.101	414.24
sp|Q8BYJ6|TBCD4_MOUSE	Tbc1d4	TBC1 domain family member 4 OS=Mus musculus OX=10090 GN=Tbc1d4 PE=1 SV=2	859	7	C	UR	984.24	768.023	951.333	1069.11	795.807	1332.6	750.819	825.963	905.719	834.607	582.418
sp|Q9JL26|FMNL1_MOUSE	Fmnl1	Formin-like protein 1 OS=Mus musculus OX=10090 GN=Fmnl1 PE=1 SV=1	860	4	C	UR	255.675	181.904	331.287	357.538	211.981	425.126	382.32	387.022	613.781	604.108	311.133
sp|Q91VH6|MEMO1_MOUSE	Memo1	Protein MEMO1 OS=Mus musculus OX=10090 GN=Memo1 PE=1 SV=1	861	6	C	UR	748.727	1077.75	107.461	659.196	894.374	598.957	135.192	784.764	655.034	602.995	800.977
sp|O88942|NFAC1_MOUSE	Nfatc1	Nuclear factor of activated T-cells, cytoplasmic 1 OS=Mus musculus OX=10090 GN=Nfatc1 PE=1 SV=1	862	2	C	UR	112.913	105.887	37.7187	111.262	105.076	122.326	42.8774	91.4926	146.748	107.994	93.9993
sp|Q8K2Z4-2|CND1_MOUSE	Ncapd2	Isoform 2 of Condensin complex subunit 1 OS=Mus musculus OX=10090 GN=Ncapd2	863	6	C	UR	381.116	385.26	255.699	608.668	367.949	454.66	229.868	482.457	633.689	482.77	408.042
sp|Q9QWY8|ASAP1_MOUSE	Asap1	Arf-GAP with SH3 domain, ANK repeat and PH domain-containing protein 1 OS=Mus musculus OX=10090 GN=Asap1 PE=1 SV=2	864	3	C	UR	580.018	563.907	220.557	528.428	536.533	585.681	161.813	431.283	749.472	590.29	601.502
sp|Q6NZJ6|IF4G1_MOUSE	Eif4g1	Eukaryotic translation initiation factor 4 gamma 1 OS=Mus musculus OX=10090 GN=Eif4g1 PE=1 SV=1	865	12	C	UR	2778.84	2885.89	1084.98	3199.87	3843.87	2712.15	977.328	3181.38	3236.37	2745.97	3443.63
sp|Q80XI3-3|IF4G3_MOUSE	Eif4g3	Isoform 3 of Eukaryotic translation initiation factor 4 gamma 3 OS=Mus musculus OX=10090 GN=Eif4g3	865	3	C	UR	478.604	400.259	293.854	469.713	304.282	533.407	205.966	388.802	420.892	371.44	346.078
sp|O89001|CBPD_MOUSE	Cpd	Carboxypeptidase D OS=Mus musculus OX=10090 GN=Cpd PE=1 SV=2	866	15	C	UR	2010.29	1705.16	5483.84	1930.29	1851.69	1888.53	6326.05	1377.64	1122.12	1085.9	1672.85
sp|P49698|HNF4A_MOUSE	Hnf4a	Hepatocyte nuclear factor 4-alpha OS=Mus musculus OX=10090 GN=Hnf4a PE=1 SV=2	867	7	C	UR	1039.57	750.416	343.402	1026.25	525.152	904.611	274.16	653.119	828.003	563.538	621.966
sp|Q9WUU6|HNF4G_MOUSE	Hnf4g	Hepatocyte nuclear factor 4-gamma OS=Mus musculus OX=10090 GN=Hnf4g PE=2 SV=2	867	1	C	UR	12.1314	17.2902	5.52401	16.285	9.80899	30.1387	4.10854	13.8808	15.7225	13.0484	10.4435
sp|Q71RI9|KAT3_MOUSE	Kyat3	Kynurenine--oxoglutarate transaminase 3 OS=Mus musculus OX=10090 GN=Kyat3 PE=1 SV=1	868	5	C	UR	1061.67	1076.79	2183.59	1230.06	1941	892.112	3122.26	1087.35	759.859	953.594	1103.83
sp|Q8BTY1|KAT1_MOUSE	Kyat1	Kynurenine--oxoglutarate transaminase 1 OS=Mus musculus OX=10090 GN=Kyat1 PE=1 SV=1	868	4	C	UR	302.53	473.797	762.96	279.578	520.983	231.243	577.197	285.498	180.471	244.046	312.91
sp|Q9WVJ3|CBPQ_MOUSE	Cpq	Carboxypeptidase Q OS=Mus musculus OX=10090 GN=Cpq PE=1 SV=1	869	6	C	UR	668.805	780.365	2592.24	587.239	1036.25	490.287	1871.37	523.79	422.021	546.699	554.143
sp|Q99KY4|GAK_MOUSE	Gak	Cyclin-G-associated kinase OS=Mus musculus OX=10090 GN=Gak PE=1 SV=2	870	10	C	UR	1283.22	871.099	383.186	1084.76	941.391	1327.56	318.716	1175.8	1351.49	1187.26	1137.3
sp|P80313|TCPH_MOUSE	Cct7	T-complex protein 1 subunit eta OS=Mus musculus OX=10090 GN=Cct7 PE=1 SV=1	871	16	C	UR	2317.42	2995.35	774.211	2887.17	2933.45	2292.83	597.809	2797.6	2674.71	2211.44	2821.02
sp|Q8VDG7|PAFA2_MOUSE	Pafah2	Platelet-activating factor acetylhydrolase 2, cytoplasmic OS=Mus musculus OX=10090 GN=Pafah2 PE=1 SV=2	872	9	C	UR	943.036	1129.82	665.608	893.152	1028.34	827.887	1311.19	802.923	732.909	658.566	901.607
sp|Q62083|PICK1_MOUSE	Pick1	PRKCA-binding protein OS=Mus musculus OX=10090 GN=Pick1 PE=1 SV=2	873	2	C	UR	231.778	269.384	164.065	274.147	187.171	255.511	92.1949	176.191	299.639	174.499	219.961
sp|Q8VED9|LEGL_MOUSE	Lgalsl	Galectin-related protein OS=Mus musculus OX=10090 GN=Lgalsl PE=1 SV=1	873	5	C	UR	805.034	989.37	856.378	639.681	837.106	612.575	965.251	709.993	604.633	593.686	865.95
sp|Q9D6Z1|NOP56_MOUSE	Nop56	Nucleolar protein 56 OS=Mus musculus OX=10090 GN=Nop56 PE=1 SV=2	874	9	C	UR	1027.51	1083.81	338.978	1736.15	960.474	1853.34	282.655	1563.92	1878.65	1502.07	1317.08
sp|Q03311|CHLE_MOUSE	Bche	Cholinesterase OS=Mus musculus OX=10090 GN=Bche PE=1 SV=2	875	6	C	UR	151.388	142.785	143.869	107.226	160.127	136.141	195.122	138.491	92.484	130.479	126.47
sp|Q9D8N0|EF1G_MOUSE	Eef1g	Elongation factor 1-gamma OS=Mus musculus OX=10090 GN=Eef1g PE=1 SV=3	876	13	C	UR	1666.34	1942.46	1772	1945.61	1925.17	1742.95	2316.98	2792.78	2652.31	1894.42	1919.93
sp|Q8R2S9|ARP8_MOUSE	Actr8	Actin-related protein 8 OS=Mus musculus OX=10090 GN=Actr8 PE=2 SV=1	877	4	C	UR	485.97	364.881	243.528	562.016	333.533	504.968	231.359	431.621	506.886	399.893	396.044
sp|P61924|COPZ1_MOUSE	Copz1	Coatomer subunit zeta-1 OS=Mus musculus OX=10090 GN=Copz1 PE=1 SV=1	878	2	C	UR	159.312	160.935	45.6269	172.41	146.614	115.602	28.6668	122.754	167.621	129.906	139.695
sp|Q80XN0|BDH_MOUSE	Bdh1	D-beta-hydroxybutyrate dehydrogenase, mitochondrial OS=Mus musculus OX=10090 GN=Bdh1 PE=1 SV=2	879	11	C	UR	2169.95	1747.3	2401.92	2106.39	1128.82	1793.28	754.089	1224.99	1237.14	1331.39	1259.53
sp|P13745|GSTA1_MOUSE	Gsta1	Glutathione S-transferase A1 OS=Mus musculus OX=10090 GN=Gsta1 PE=1 SV=2	880	6	C	UR	997.648	790.77	321.399	827.731	878.069	921.493	228.273	1569.8	601.957	978.036	910.692
sp|P30115|GSTA3_MOUSE	Gsta3	Glutathione S-transferase A3 OS=Mus musculus OX=10090 GN=Gsta3 PE=1 SV=2	880	1	C	UR	20.8523	32.0698	12.441	23.0125	46.6912	29.6525	35.0129	37.9008	21.0711	28.1176	25.603
sp|Q8VCH7|RDH10_MOUSE	Rdh10	Retinol dehydrogenase 10 OS=Mus musculus OX=10090 GN=Rdh10 PE=1 SV=2	881	1	C	UR	63.8584	48.522	86.1379	72.5697	13.5677	71.0629	68.1352	32.8293	60.3954	37.9986	32.4202
sp|Q9CZ42|NNRD_MOUSE	Naxd	ATP-dependent (S)-NAD(P)H-hydrate dehydratase OS=Mus musculus OX=10090 GN=Naxd PE=1 SV=1	882	5	C	UR	1139.36	1160.73	337.78	1103.91	661.235	1374.47	235.328	1005.05	960.388	1145.38	871.441
sp|P61211|ARL1_MOUSE	Arl1	ADP-ribosylation factor-like protein 1 OS=Mus musculus OX=10090 GN=Arl1 PE=1 SV=1	883	7	C	UR	355.288	289.673	216.27	443.944	243.235	511.942	201.654	334.927	389.372	409.988	309.163
sp|Q9Z2C9|MTMR7_MOUSE	Mtmr7	Myotubularin-related protein 7 OS=Mus musculus OX=10090 GN=Mtmr7 PE=1 SV=2	884	7	C	UR	787.191	602.229	439.055	692.592	522.667	793.787	365.97	570.25	677.514	520.688	663.266
sp|Q8VE11-2|MTMR6_MOUSE	Mtmr6	Isoform 2 of Myotubularin-related protein 6 OS=Mus musculus OX=10090 GN=Mtmr6	884	1	C	UR	121.817	129.29	30.2136	128.506	94.2582	119.362	77.5871	80.9255	96.7674	71.8562	77.0728
sp|Q5M8N4|D39U1_MOUSE	Sdr39u1	Epimerase family protein SDR39U1 OS=Mus musculus OX=10090 GN=Sdr39u1 PE=1 SV=2	885	1	C	UR	71.963	36.3005	9.92061	34.4858	51.829	25.3611	18.7628	48.617	26.4286	27.3176	31.3128
sp|Q64521|GPDM_MOUSE	Gpd2	Glycerol-3-phosphate dehydrogenase, mitochondrial OS=Mus musculus OX=10090 GN=Gpd2 PE=1 SV=2	886	13	C	UR	1439.41	1662.73	5306.41	1383.6	862.36	1060.36	11155.2	913.883	880.952	1023.96	1169.98
sp|Q9DCJ9|NPL_MOUSE	Npl	N-acetylneuraminate lyase OS=Mus musculus OX=10090 GN=Npl PE=1 SV=1	887	1	C	UR	21.8905	22.9468	75.4545	29.3063	22.6796	35.7743	76.0642	35.3889	39.4213	43.208	36.1325
sp|Q9R0Q3|TMED2_MOUSE	Tmed2	Transmembrane emp24 domain-containing protein 2 OS=Mus musculus OX=10090 GN=Tmed2 PE=1 SV=1	888	5	C	UR	1146.94	996.215	3502.9	1173.61	481.953	1044.6	2616.45	532.713	708.658	626.565	733.355
sp|Q8BML9|SYQ_MOUSE	Qars1	Glutamine--tRNA ligase OS=Mus musculus OX=10090 GN=Qars1 PE=1 SV=1	889	15	C	UR	2350.91	1636.43	978.338	2296.07	2303.29	2669.64	852.942	2496.82	2522.74	2384.3	2235.43
sp|Q9Z2V4|PCKGC_MOUSE	Pck1	Phosphoenolpyruvate carboxykinase, cytosolic [GTP] OS=Mus musculus OX=10090 GN=Pck1 PE=1 SV=1	890	4	C	UR	337.484	446.839	291.62	309.425	379.595	423.531	242.188	343.755	378.242	404.821	249.445
sp|Q91VJ1|AIM2_MOUSE	Aim2	Interferon-inducible protein AIM2 OS=Mus musculus OX=10090 GN=Aim2 PE=1 SV=2	891	3	C	UR	257.673	247.484	229.698	249.245	282.217	184.028	317.795	238.65	246.111	187.354	279.036
sp|Q5FWK3|RHG01_MOUSE	Arhgap1	Rho GTPase-activating protein 1 OS=Mus musculus OX=10090 GN=Arhgap1 PE=1 SV=1	892	8	C	UR	1246.21	808.167	572.358	1411.72	1362.72	1813.44	538.255	1699.03	1734.78	1910.63	1674.17
sp|Q9QUM9|PSA6_MOUSE	Psma6	Proteasome subunit alpha type-6 OS=Mus musculus OX=10090 GN=Psma6 PE=1 SV=1	894	14	C	UR	1770.26	2344.33	3321.62	1462.05	2351.35	1248.21	5099.49	1829.84	1285.1	1457.82	1460.95
sp|Q80ZM7|T2AG_MOUSE	Gtf2a2	Transcription initiation factor IIA subunit 2 OS=Mus musculus OX=10090 GN=Gtf2a2 PE=1 SV=2	895	2	C	UR	262.791	298.926	967.915	318.83	171.52	255.051	1254.78	198.122	212.012	194.416	156.067
sp|Q8BWW4|LARP4_MOUSE	Larp4	La-related protein 4 OS=Mus musculus OX=10090 GN=Larp4 PE=1 SV=2	896	2	C	UR	97.7871	74.4439	53.4906	119.995	58.8263	129.442	59.1201	140.726	158.477	130.747	126.343
sp|P16546-2|SPTN1_MOUSE	Sptan1	Isoform 2 of Spectrin alpha chain, non-erythrocytic 1 OS=Mus musculus OX=10090 GN=Sptan1	897	29	C	UR	2652.18	2122.83	557.354	2763.88	3491.98	2559.22	655.42	3624.69	2810.83	2971.67	3191.75
sp|Q3UJU9|RMD3_MOUSE	Rmdn3	Regulator of microtubule dynamics protein 3 OS=Mus musculus OX=10090 GN=Rmdn3 PE=1 SV=2	898	6	C	UR	352.019	308.439	505.564	328.877	394.97	359.863	469.441	622.06	515.501	706.598	599.179
sp|O08601-2|MTP_MOUSE	Mttp	Isoform 2 of Microsomal triglyceride transfer protein large subunit OS=Mus musculus OX=10090 GN=Mttp	899	7	C	UR	1276.01	484.631	854.566	649.289	848.357	311.501	1383.49	438.216	292.388	375.724	626.471
sp|P40936|INMT_MOUSE	Inmt	Indolethylamine N-methyltransferase OS=Mus musculus OX=10090 GN=Inmt PE=1 SV=1	900	2	C	UR	188.791	159.478	114.811	152.721	160.678	174.494	180.375	102.295	78.4722	74.7606	89.9114
sp|Q3UVL4|VPS51_MOUSE	Vps51	Vacuolar protein sorting-associated protein 51 homolog OS=Mus musculus OX=10090 GN=Vps51 PE=1 SV=2	901	9	C	UR	981.496	747.706	1166.33	1045.56	569.267	1191.32	924.347	744.654	843.378	732.31	699.432
sp|Q9QZ06|TOLIP_MOUSE	Tollip	Toll-interacting protein OS=Mus musculus OX=10090 GN=Tollip PE=1 SV=1	902	4	C	UR	495.217	499.132	616.887	498.274	396.394	485.96	912.027	467.775	527.779	512.841	492.959
sp|Q05D44|IF2P_MOUSE	Eif5b	Eukaryotic translation initiation factor 5B OS=Mus musculus OX=10090 GN=Eif5b PE=1 SV=2	903	11	C	UR	1368.36	827.917	341.892	956.755	1420.51	1129.54	262.283	1991.47	1465.17	1606.34	1616.41
sp|Q9JLN9|MTOR_MOUSE	Mtor	Serine/threonine-protein kinase mTOR OS=Mus musculus OX=10090 GN=Mtor PE=1 SV=2	904	4	C	UR	336.983	294.194	210.264	368.381	251.867	406.965	234.82	262.951	276.67	299.988	250.351
sp|Q8VE19|MIO_MOUSE	Mios	GATOR complex protein MIOS OS=Mus musculus OX=10090 GN=Mios PE=1 SV=2	905	4	C	UR	663.65	407.486	350	629.859	573.131	694.99	254.969	573.057	557.064	539.061	487.468
sp|Q9QYI4|DJB12_MOUSE	Dnajb12	DnaJ homolog subfamily B member 12 OS=Mus musculus OX=10090 GN=Dnajb12 PE=1 SV=2	906	5	C	UR	695.033	654.557	332.246	531.562	227.469	351.437	224.959	314.559	356.01	354.244	313.074
sp|Q3TCH7|CUL4A_MOUSE	Cul4a	Cullin-4A OS=Mus musculus OX=10090 GN=Cul4a PE=1 SV=1	907	4	C	UR	878.481	453.23	593.743	902.951	534.334	1138.79	564.236	634.62	601.69	630.205	541.02
sp|A2A432|CUL4B_MOUSE	Cul4b	Cullin-4B OS=Mus musculus OX=10090 GN=Cul4b PE=1 SV=1	907	4	C	UR	516.99	416.176	569.123	580.708	418.164	575.44	346.186	458.531	560.895	484.234	460.756
sp|Q8VCM7|FIBG_MOUSE	Fgg	Fibrinogen gamma chain OS=Mus musculus OX=10090 GN=Fgg PE=1 SV=1	908	24	C	UR	2117.94	3061.84	4776.26	4016.75	940.365	1915.92	6244.64	958.42	3397.38	5128.98	2127.53
sp|Q3UB74|TBRG1_MOUSE	Tbrg1	Transforming growth factor beta regulator 1 OS=Mus musculus OX=10090 GN=Tbrg1 PE=1 SV=2	910	1	C	UR	215.945	122.577	66.1279	233.819	147.708	327.03	53.6513	218.992	308.241	230.464	173.693
sp|P56695|WFS1_MOUSE	Wfs1	Wolframin OS=Mus musculus OX=10090 GN=Wfs1 PE=1 SV=1	911	2	C	UR	213.888	239.869	96.6036	208.471	158.329	214.256	96.7192	172.624	268.818	188.382	163.84
sp|P23953|EST1C_MOUSE	Ces1c	Carboxylesterase 1C OS=Mus musculus OX=10090 GN=Ces1c PE=1 SV=4	912	10	C	UR	940.894	1651.12	3875.43	954.462	1600.25	607.561	4295.11	999.488	1231.55	1720.58	1338.43
sp|Q8VCT4|EST1D_MOUSE	Ces1d	Carboxylesterase 1D OS=Mus musculus OX=10090 GN=Ces1d PE=1 SV=1	912	7	C	UR	1513.64	1246.73	2218.68	1070.62	1289.38	943.305	1735.32	856.831	880.218	965.729	794.835
tr|D3Z5G7|D3Z5G7_MOUSE	Ces1b	Carboxylic ester hydrolase OS=Mus musculus OX=10090 GN=Ces1b PE=1 SV=1	912	5	C	UR	270.48	273.869	285.397	286.326	295.095	183.989	434.337	278.179	170.178	256.919	247.469
sp|Q64464|CP3AD_MOUSE	Cyp3a13	Cytochrome P450 3A13 OS=Mus musculus OX=10090 GN=Cyp3a13 PE=1 SV=1	913	10	C	UR	3176.89	1616.48	758.286	2389.27	634.703	2368.73	827.477	1648.45	1421.82	1644.84	1434.38
sp|Q8VCE6|NT5M_MOUSE	Nt5m	5'(3')-deoxyribonucleotidase, mitochondrial OS=Mus musculus OX=10090 GN=Nt5m PE=1 SV=1	914	1	C	UR	72.5703	83.9872	99.4803	93.7972	85.6459	57.6533	116.285	62.6606	50.9778	60.7038	66.0785
sp|O88532|ZFR_MOUSE	Zfr	Zinc finger RNA-binding protein OS=Mus musculus OX=10090 GN=Zfr PE=1 SV=2	915	3	C	UR	253.619	256.172	62.4611	214.292	261.657	259.62	45.4862	242.801	336.803	247.672	292.637
sp|P70695|F16P2_MOUSE	Fbp2	Fructose-1,6-bisphosphatase isozyme 2 OS=Mus musculus OX=10090 GN=Fbp2 PE=1 SV=2	916	8	C	UR	1579.3	1706.96	295.462	973.142	1924.01	796.096	341.079	1207.77	916.861	891.02	1187.4
sp|Q9QXD6|F16P1_MOUSE	Fbp1	Fructose-1,6-bisphosphatase 1 OS=Mus musculus OX=10090 GN=Fbp1 PE=1 SV=3	916	4	C	UR	895.829	627.476	186.02	513.63	1015.26	490.22	131.174	472.062	383.543	384.299	484.433
sp|Q99JT1|GATB_MOUSE	Gatb	Glutamyl-tRNA(Gln) amidotransferase subunit B, mitochondrial OS=Mus musculus OX=10090 GN=Gatb PE=1 SV=1	917	3	C	UR	334.531	527.059	228.792	484.651	337.448	465.576	119.595	413.016	403.832	392.454	342.467
sp|P70372|ELAV1_MOUSE	Elavl1	ELAV-like protein 1 OS=Mus musculus OX=10090 GN=Elavl1 PE=1 SV=2	918	7	C	UR	726.607	833.658	130.279	702.521	730.154	611.691	115.969	797.57	739.933	775.785	848.953
sp|B2RXS4|PLXB2_MOUSE	Plxnb2	Plexin-B2 OS=Mus musculus OX=10090 GN=Plxnb2 PE=1 SV=1	919	17	C	UR	1656.29	1396.46	3251.32	1672.72	1124.14	1643.75	3216.12	1325.14	1424.11	1230.33	1685.8
sp|Q91VS8|FARP2_MOUSE	Farp2	FERM, ARHGEF and pleckstrin domain-containing protein 2 OS=Mus musculus OX=10090 GN=Farp2 PE=1 SV=2	920	6	C	UR	438.408	422.337	465.015	574.855	292.274	513.819	292.676	378.612	390.507	328.464	329.159
sp|Q8BP67|RL24_MOUSE	Rpl24	60S ribosomal protein L24 OS=Mus musculus OX=10090 GN=Rpl24 PE=1 SV=2	921	7	C	UR	792.327	893.607	368.683	895.189	638.517	739.502	270.728	891.399	946.891	635.942	745.739
sp|Q60759|GCDH_MOUSE	Gcdh	Glutaryl-CoA dehydrogenase, mitochondrial OS=Mus musculus OX=10090 GN=Gcdh PE=1 SV=2	922	2	C	UR	361.697	263.349	244.147	410.083	453.918	365.376	139.136	359.902	262.422	292.658	355.874
sp|Q8R081|HNRPL_MOUSE	Hnrnpl	Heterogeneous nuclear ribonucleoprotein L OS=Mus musculus OX=10090 GN=Hnrnpl PE=1 SV=2	923	12	C	UR	886.012	736.817	139.563	717.709	1393.53	1291.78	164.516	1831.22	1158.09	1568.6	1498.85
tr|Q9ER05|Q9ER05_MOUSE	Ctrl	Chymopasin OS=Mus musculus OX=10090 GN=Ctrl PE=1 SV=1	924	9	C	UR	63.0684	63.551	2238.97	79.1302	59.3819	50.488	2045.98	57.2142	63.3789	49.7124	99.3752
sp|Q9Z0E6|GBP2_MOUSE	Gbp2	Guanylate-binding protein 2 OS=Mus musculus OX=10090 GN=Gbp2 PE=1 SV=1	925	4	C	UR	173.308	196.835	49.8292	190.04	192.1	349.352	66.3229	446.477	814.896	500.643	337.718
sp|Q148W0|AT8B1_MOUSE	Atp8b1	Phospholipid-transporting ATPase IC OS=Mus musculus OX=10090 GN=Atp8b1 PE=1 SV=2	926	8	C	UR	804.306	765.105	1822.81	1010.46	558.339	704.98	2057.8	764.996	701.449	645.452	775.488
sp|P98200|AT8A2_MOUSE	Atp8a2	Phospholipid-transporting ATPase IB OS=Mus musculus OX=10090 GN=Atp8a2 PE=1 SV=1	926	2	C	UR	40.2778	47.9337	55.629	52.2706	33.8336	54.4009	66.4041	29.5628	34.8964	30.0242	32.847
sp|P70704|AT8A1_MOUSE	Atp8a1	Phospholipid-transporting ATPase IA OS=Mus musculus OX=10090 GN=Atp8a1 PE=1 SV=2	926	6	C	UR	717.09	688.752	1083.42	772.24	231.479	588.679	1270.14	313.867	530.834	427.184	341.824
sp|Q8BGF7|PAN2_MOUSE	Pan2	PAN2-PAN3 deadenylation complex catalytic subunit Pan2 OS=Mus musculus OX=10090 GN=Pan2 PE=1 SV=1	927	2	C	UR	120.635	70.6382	50.4342	124.479	60.2428	143.076	44.5463	108.093	124.428	107.514	87.6616
sp|P70424|ERBB2_MOUSE	Erbb2	Receptor tyrosine-protein kinase erbB-2 OS=Mus musculus OX=10090 GN=Erbb2 PE=1 SV=3	928	6	C	UR	676.025	600.349	1059.54	666.691	459.029	515.177	1841.39	488.46	510.235	428.025	568.209
sp|P97447|FHL1_MOUSE	Fhl1	Four and a half LIM domains protein 1 OS=Mus musculus OX=10090 GN=Fhl1 PE=1 SV=3	929	10	C	UR	2383.81	1936.05	1124.05	2513.4	1492.92	4111.41	479.733	1973.85	2857.12	3824.01	2226.82
sp|Q9Z2U0|PSA7_MOUSE	Psma7	Proteasome subunit alpha type-7 OS=Mus musculus OX=10090 GN=Psma7 PE=1 SV=1	930	9	C	UR	1166.84	1518.5	2569.59	1333.57	1424.21	802.709	4354.31	1322.19	1064.99	884.223	873.76
sp|Q08481|PECA1_MOUSE	Pecam1	Platelet endothelial cell adhesion molecule OS=Mus musculus OX=10090 GN=Pecam1 PE=1 SV=1	931	1	C	UR	128.398	124.868	109.1	123.746	97.5471	319.125	403.781	107.044	223.308	184.362	82.6023
sp|D3Z6Q9|BIN2_MOUSE	Bin2	Bridging integrator 2 OS=Mus musculus OX=10090 GN=Bin2 PE=1 SV=1	933	4	C	UR	286.112	305.716	231.624	330	529.482	402.185	211.602	577.984	836.358	829.258	590.227
sp|Q8VDM6|HNRL1_MOUSE	Hnrnpul1	Heterogeneous nuclear ribonucleoprotein U-like protein 1 OS=Mus musculus OX=10090 GN=Hnrnpul1 PE=1 SV=1	934	5	C	UR	754.104	834.905	811.721	555.1	687.225	501.566	2851.42	668.469	559.975	650.801	646.457
sp|P28700|RXRA_MOUSE	Rxra	Retinoic acid receptor RXR-alpha OS=Mus musculus OX=10090 GN=Rxra PE=1 SV=1	935	2	C	UR	234.641	133.261	270.743	217.414	143.171	315.117	239.336	162.305	172.521	153.337	140.88
sp|Q99NB9|SF3B1_MOUSE	Sf3b1	Splicing factor 3B subunit 1 OS=Mus musculus OX=10090 GN=Sf3b1 PE=1 SV=1	936	8	C	UR	845.589	744.927	577.997	1031.34	787.906	1372.16	708.123	1047.97	1082.64	886.204	950.439
sp|Q8CGF7|TCRG1_MOUSE	Tcerg1	Transcription elongation regulator 1 OS=Mus musculus OX=10090 GN=Tcerg1 PE=1 SV=2	937	4	C	UR	379.121	374.994	204.017	395.181	514.172	434.713	168.176	573.918	512.95	593.991	534.504
sp|Q69ZR2|HECD1_MOUSE	Hectd1	E3 ubiquitin-protein ligase HECTD1 OS=Mus musculus OX=10090 GN=Hectd1 PE=1 SV=2	938	12	C	UR	622.821	604.495	272.764	673.381	613.074	661.667	319.616	685.552	820.275	749.416	687.7
sp|Q9D8W5|PSD12_MOUSE	Psmd12	26S proteasome non-ATPase regulatory subunit 12 OS=Mus musculus OX=10090 GN=Psmd12 PE=1 SV=4	939	17	C	UR	1830.68	1907.46	1092.43	2014.17	1652.9	1913.5	1029.2	1724.3	2260.16	1566.11	1871.45
sp|Q11136|PEPD_MOUSE	Pepd	Xaa-Pro dipeptidase OS=Mus musculus OX=10090 GN=Pepd PE=1 SV=3	940	13	C	UR	1074.68	1521.37	2848.43	950.5	1296.17	870.251	3743.84	1175.2	892.767	983.272	959.69
sp|Q8K0D5|EFGM_MOUSE	Gfm1	Elongation factor G, mitochondrial OS=Mus musculus OX=10090 GN=Gfm1 PE=1 SV=1	941	8	C	UR	1230.15	1695.42	1540.28	1616.5	930.848	1158	2028.86	1296.38	1247.99	1340.67	1240.7
sp|Q5JCT0|GCNT3_MOUSE	Gcnt3	Beta-1,3-galactosyl-O-glycosyl-glycoprotein beta-1,6-N-acetylglucosaminyltransferase 3 OS=Mus musculus OX=10090 GN=Gcnt3 PE=2 SV=2	942	12	C	UR	1738.99	1064.3	2480.43	1725.82	1311.5	1810.12	849.141	1073.88	937.454	1038.37	835.28
sp|Q64471|GSTT1_MOUSE	Gstt1	Glutathione S-transferase theta-1 OS=Mus musculus OX=10090 GN=Gstt1 PE=1 SV=4	943	3	C	UR	948.971	690.281	721.445	1041.12	762.278	2059.45	472.064	1013.33	1429.14	1299.62	944.25
sp|O55234|PSB5_MOUSE	Psmb5	Proteasome subunit beta type-5 OS=Mus musculus OX=10090 GN=Psmb5 PE=1 SV=3	944	10	C	UR	1081.87	1790.14	1432.25	1136.87	1320.37	656.047	2116.84	1058.08	892.856	734.573	992.463
sp|Q3TCJ1|ABRX2_MOUSE	Abraxas2	BRISC complex subunit Abraxas 2 OS=Mus musculus OX=10090 GN=Abraxas2 PE=1 SV=1	945	5	C	UR	705.286	667.152	190.061	693.238	534.074	707.252	174.695	554.231	610.32	559.53	580.426
sp|Q61543|GSLG1_MOUSE	Glg1	Golgi apparatus protein 1 OS=Mus musculus OX=10090 GN=Glg1 PE=1 SV=1	946	15	C	UR	3608.91	2953.16	3861.08	2533.19	2270.07	1765.15	3715.54	1703.52	1435.2	1480.26	1697.82
sp|P14094|AT1B1_MOUSE	Atp1b1	Sodium/potassium-transporting ATPase subunit beta-1 OS=Mus musculus OX=10090 GN=Atp1b1 PE=1 SV=1	947	15	C	UR	1239.91	1188.29	3712.2	2281.43	953.879	1152.4	2760.08	1142.26	1139.18	738.261	927.398
sp|F6ZDS4|TPR_MOUSE	Tpr	Nucleoprotein TPR OS=Mus musculus OX=10090 GN=Tpr PE=1 SV=1	948	20	C	UR	3581.78	3480.48	491.006	3472.34	3023.86	3047.49	435.862	4209.7	4048.15	4581.05	3566.05
sp|Q07235|GDN_MOUSE	Serpine2	Glia-derived nexin OS=Mus musculus OX=10090 GN=Serpine2 PE=1 SV=2	949	3	C	UR	560.92	477.739	1374.22	337.899	272.346	782.063	1566.1	320.283	467.378	487.432	344.28
sp|P62983|RS27A_MOUSE	Rps27a	Ubiquitin-40S ribosomal protein S27a OS=Mus musculus OX=10090 GN=Rps27a PE=1 SV=2	950	17	C	UR	1518.84	2043.18	2745.99	1775.6	1987.65	1686.75	3101.42	2038.85	1434.05	1655.55	1766.32
sp|Q80XH1|KXDL1_MOUSE	Kxd1	KxDL motif-containing protein 1 OS=Mus musculus OX=10090 GN=Kxd1 PE=1 SV=1	950	1	C	UR	96.918	116.454	39.25	100.173	87.6827	99.046	34.6902	74.2251	76.632	78.0657	87.0913
sp|O88844|IDHC_MOUSE	Idh1	Isocitrate dehydrogenase [NADP] cytoplasmic OS=Mus musculus OX=10090 GN=Idh1 PE=1 SV=2	951	26	C	UR	2938.22	4839	431.354	2280.24	3684.93	1482.84	434.755	2435.05	2410.57	1913.1	2435.72
sp|P54071|IDHP_MOUSE	Idh2	Isocitrate dehydrogenase [NADP], mitochondrial OS=Mus musculus OX=10090 GN=Idh2 PE=1 SV=3	951	9	C	UR	1291.31	1313.95	1245.15	1176.33	1681.21	1302.83	362.072	1350.36	1021.9	948.066	1455.21
sp|Q9D2G2|ODO2_MOUSE	Dlst	Dihydrolipoyllysine-residue succinyltransferase component of 2-oxoglutarate dehydrogenase complex, mitochondrial OS=Mus musculus OX=10090 GN=Dlst PE=1 SV=1	952	7	C	UR	1291	1489.08	384.565	1606.07	2563.7	1272.31	337.134	1488.92	1068.09	1611.25	1819.32
sp|P34914|HYES_MOUSE	Ephx2	Bifunctional epoxide hydrolase 2 OS=Mus musculus OX=10090 GN=Ephx2 PE=1 SV=2	953	11	C	UR	836.708	1049.68	388.528	1115.31	1314.96	733.462	256.756	868.707	753.259	948.186	1195.82
sp|P14685|PSMD3_MOUSE	Psmd3	26S proteasome non-ATPase regulatory subunit 3 OS=Mus musculus OX=10090 GN=Psmd3 PE=1 SV=3	954	12	C	UR	2423.68	2190.37	1414.08	2498.23	2905.89	2749.9	1122.07	4124.73	2758.43	3295.23	3127.67
sp|Q9CZW4|ACSL3_MOUSE	Acsl3	Long-chain-fatty-acid--CoA ligase 3 OS=Mus musculus OX=10090 GN=Acsl3 PE=1 SV=2	955	6	C	UR	542.363	358.598	185.092	715.922	189.859	600.599	172.328	321.426	448.791	406.887	369.551
sp|Q9WUM5|SUCA_MOUSE	Suclg1	Succinate--CoA ligase [ADP/GDP-forming] subunit alpha, mitochondrial OS=Mus musculus OX=10090 GN=Suclg1 PE=1 SV=4	956	7	C	UR	1298.82	1064.77	1458.36	1300.26	1120.95	1228	882.897	1007.06	808.469	957.241	1122.31
sp|Q9CPW4|ARPC5_MOUSE	Arpc5	Actin-related protein 2/3 complex subunit 5 OS=Mus musculus OX=10090 GN=Arpc5 PE=1 SV=3	957	5	C	UR	614.136	367.984	154.117	347.312	715.443	417.232	155.889	476.576	392.048	382.999	665.695
sp|P49717|MCM4_MOUSE	Mcm4	DNA replication licensing factor MCM4 OS=Mus musculus OX=10090 GN=Mcm4 PE=1 SV=1	958	6	C	UR	587.301	641.216	244.256	912.692	1022.65	856.707	153.926	1007.56	1111.53	896.092	834.623
sp|Q9D0M3|CY1_MOUSE	Cyc1	Cytochrome c1, heme protein, mitochondrial OS=Mus musculus OX=10090 GN=Cyc1 PE=1 SV=1	959	9	C	UR	336.569	518.395	1287.53	600.122	299.334	268.99	1277.94	328.639	288.351	266.237	247.889
sp|Q64434|PTK6_MOUSE	Ptk6	Protein-tyrosine kinase 6 OS=Mus musculus OX=10090 GN=Ptk6 PE=1 SV=1	960	3	C	UR	302.329	311.883	74.4723	204.774	299.222	276.44	50.6825	357.407	262.912	236.496	408.558
sp|A3KGF7|PLCB2_MOUSE	Plcb2	1-phosphatidylinositol 4,5-bisphosphate phosphodiesterase beta-2 OS=Mus musculus OX=10090 GN=Plcb2 PE=1 SV=1	961	4	C	UR	338.849	354.981	93.6722	299.248	471.405	268.653	59.988	327.252	286.724	291.739	353.003
sp|Q8BZX4-2|SREK1_MOUSE	Srek1	Isoform 2 of Splicing regulatory glutamine/lysine-rich protein 1 OS=Mus musculus OX=10090 GN=Srek1	962	2	C	UR	171.875	183.703	53.4409	156.084	131.392	132.868	46.7553	172.578	165.891	164.61	171.089
sp|O08644|EPHB6_MOUSE	Ephb6	Ephrin type-B receptor 6 OS=Mus musculus OX=10090 GN=Ephb6 PE=2 SV=4	963	1	C	UR	53.9309	47.5022	145.386	104.111	66.7333	31.2209	101.689	29.4077	221.882	83.5047	101.223
sp|Q3UEB3|PUF60_MOUSE	Puf60	Poly(U)-binding-splicing factor PUF60 OS=Mus musculus OX=10090 GN=Puf60 PE=1 SV=2	964	8	C	UR	1694.78	1764.38	296.709	1559.94	1724.23	1315.43	501.025	1928.99	1833.02	1777.1	1817.48
sp|Q9DBS5|KLC4_MOUSE	Klc4	Kinesin light chain 4 OS=Mus musculus OX=10090 GN=Klc4 PE=1 SV=1	965	7	C	UR	1549.14	1121.44	275.234	1210.44	999.821	1311.5	228.916	1431.77	1544.85	1677.56	1522.61
tr|A0A5F8MPZ2|A0A5F8MPZ2_MOUSE	Klc1	Kinesin light chain OS=Mus musculus OX=10090 GN=Klc1 PE=1 SV=1	965	5	C	UR	836.53	503.188	557.158	815.33	692.053	1390.77	417.965	1053.08	1113.45	1322.04	819.559
sp|Q7TNG8|LDHD_MOUSE	Ldhd	Probable D-lactate dehydrogenase, mitochondrial OS=Mus musculus OX=10090 GN=Ldhd PE=1 SV=1	966	3	C	UR	502.969	329.438	338.273	382.942	497.679	440.986	334.965	379.179	295.309	330.402	437.873
sp|Q9CZP5|BCS1_MOUSE	Bcs1l	Mitochondrial chaperone BCS1 OS=Mus musculus OX=10090 GN=Bcs1l PE=1 SV=1	967	2	C	UR	292.206	481.588	858.226	381.687	235.196	301.543	1750.76	216.181	189.49	216.114	233.301
sp|Q99JY0|ECHB_MOUSE	Hadhb	Trifunctional enzyme subunit beta, mitochondrial OS=Mus musculus OX=10090 GN=Hadhb PE=1 SV=1	968	17	C	UR	5186.34	5314.14	1802.08	4931.69	4729.3	3220.15	1219.06	3254.03	2826.36	2567.24	3378.04
tr|E9Q166|E9Q166_MOUSE	Atad2b	ATPase family, AAA domain-containing 2B OS=Mus musculus OX=10090 GN=Atad2b PE=1 SV=1	969	1	C	UR	35.3144	27.7985	0.774274	30.9859	45.5513	48.9528	4.98944	52.3085	68.0031	59.5329	67.2867
sp|P57716|NICA_MOUSE	Ncstn	Nicastrin OS=Mus musculus OX=10090 GN=Ncstn PE=1 SV=3	970	7	C	UR	1396.7	1590.75	3946.09	1571.85	1364.34	1170.33	5429.67	1130.83	1042.27	974.376	1359.55
sp|Q91W90|TXND5_MOUSE	Txndc5	Thioredoxin domain-containing protein 5 OS=Mus musculus OX=10090 GN=Txndc5 PE=1 SV=2	971	16	C	UR	3993.62	2160.11	772.707	2824.75	4984.06	3940.34	826.982	3622.45	2416.17	3119.66	2799.78
sp|Q9WVM3|APC7_MOUSE	Anapc7	Anaphase-promoting complex subunit 7 OS=Mus musculus OX=10090 GN=Anapc7 PE=1 SV=3	972	1	C	UR	272.781	259.649	81.8519	395.053	226.939	331.556	101.695	356.294	490.857	368.982	298.572
sp|Q3UHA3|SPTCS_MOUSE	Spg11	Spatacsin OS=Mus musculus OX=10090 GN=Spg11 PE=1 SV=3	973	2	C	UR	103.17	78.5183	192.101	91.23	78.6398	99.8429	190.7	77.9471	102.722	77.6932	83.6042
sp|P26443|DHE3_MOUSE	Glud1	Glutamate dehydrogenase 1, mitochondrial OS=Mus musculus OX=10090 GN=Glud1 PE=1 SV=1	974	17	C	UR	2485.31	2488.61	2425.54	2469.48	3061.55	1966.6	3120.69	2024.03	1818.52	1766.36	2545.32
sp|A2AN08-5|UBR4_MOUSE	Ubr4	Isoform 5 of E3 ubiquitin-protein ligase UBR4 OS=Mus musculus OX=10090 GN=Ubr4	975	18	C	UR	2512.19	1808.99	1314.6	2507.54	1643.67	2959.37	1084.67	2256.93	2545.73	2278.45	2045.75
sp|E9QAM5|HELZ2_MOUSE	Helz2	Helicase with zinc finger domain 2 OS=Mus musculus OX=10090 GN=Helz2 PE=1 SV=1	976	11	C	UR	640.966	480.152	543.611	637.779	425.062	676.567	499.352	545.785	638.611	512.394	557.327
tr|A0A0R4J094|A0A0R4J094_MOUSE	Fahd2a	Fumarylacetoacetate hydrolase domain-containing 2A OS=Mus musculus OX=10090 GN=Fahd2a PE=1 SV=1	977	3	C	UR	158.597	155.008	137.569	162.848	207.116	165.758	152.733	134.892	106.675	124.383	150.061
sp|Q68FF6|GIT1_MOUSE	Git1	ARF GTPase-activating protein GIT1 OS=Mus musculus OX=10090 GN=Git1 PE=1 SV=1	978	3	C	UR	157.958	106.157	67.8643	99.3414	142.016	66.9907	40.7435	174.958	177.081	195.629	150.985
sp|Q9D898|ARP5L_MOUSE	Arpc5l	Actin-related protein 2/3 complex subunit 5-like protein OS=Mus musculus OX=10090 GN=Arpc5l PE=1 SV=1	979	3	C	UR	112.258	65.5778	37.4487	80.6781	188.357	105.715	42.1427	128.289	103.532	122.488	178.943
sp|O70475|UGDH_MOUSE	Ugdh	UDP-glucose 6-dehydrogenase OS=Mus musculus OX=10090 GN=Ugdh PE=1 SV=1	980	17	C	UR	5377.4	6629.83	1122.3	3343.92	5495.53	2767.3	973.162	4351.08	2793.9	3266.74	3406.8
sp|E9PVA8|GCN1_MOUSE	Gcn1	eIF-2-alpha kinase activator GCN1 OS=Mus musculus OX=10090 GN=Gcn1 PE=1 SV=1	981	12	C	UR	1660.9	1184.22	1443.64	1923.8	1159.01	2619.19	1402.92	1675.33	1938.89	1545.25	1492.22
sp|Q9CRC0|VKOR1_MOUSE	Vkorc1	Vitamin K epoxide reductase complex subunit 1 OS=Mus musculus OX=10090 GN=Vkorc1 PE=1 SV=1	982	1	C	UR	88.1857	67.8155	48.0881	83.37	31.303	111.918	53.0876	35.475	76.2791	56.6158	32.5556
sp|Q8JZQ5|AOC1_MOUSE	Aoc1	Amiloride-sensitive amine oxidase [copper-containing] OS=Mus musculus OX=10090 GN=Aoc1 PE=2 SV=1	983	6	C	UR	883.038	714.931	568.986	637.965	897.146	485.68	955.731	599.361	440.448	461.725	496.996
sp|Q8K1R3|PNPT1_MOUSE	Pnpt1	Polyribonucleotide nucleotidyltransferase 1, mitochondrial OS=Mus musculus OX=10090 GN=Pnpt1 PE=1 SV=1	984	8	C	UR	528.67	539.022	354.74	537.13	690.821	456.673	265.288	571.487	413.308	451.115	613.915
sp|Q9QZE5|COPG1_MOUSE	Copg1	Coatomer subunit gamma-1 OS=Mus musculus OX=10090 GN=Copg1 PE=1 SV=1	985	10	C	UR	1962.65	1717.68	818.342	1757.07	1404.77	1993.43	1584.07	1343.5	1633.53	1358.76	1461.21
sp|Q9QXK3|COPG2_MOUSE	Copg2	Coatomer subunit gamma-2 OS=Mus musculus OX=10090 GN=Copg2 PE=1 SV=1	985	5	C	UR	576.813	476.93	430.245	727.655	469.006	784.273	347.071	572.673	563.651	509.984	473.143
tr|Q7TNQ1|Q7TNQ1_MOUSE	Copg1	Coatomer protein complex, subunit gamma OS=Mus musculus OX=10090 GN=Copg1 PE=1 SV=1	985	1	C	UR	6.5283	11.059	495.348	16.2345	4.84726	4.30877	32.2664	4.19094	9.04678	5.22019	2.99746
sp|Q9R1I1|CHST4_MOUSE	Chst4	Carbohydrate sulfotransferase 4 OS=Mus musculus OX=10090 GN=Chst4 PE=2 SV=1	986	5	C	UR	475.288	329.402	633.364	505.383	335.084	719.331	412.139	396.241	437.155	346.491	298.62
sp|Q91YM2|RHG35_MOUSE	Arhgap35	Rho GTPase-activating protein 35 OS=Mus musculus OX=10090 GN=Arhgap35 PE=1 SV=3	987	3	C	UR	161.867	155.19	61.088	160.695	184.686	166.353	49.4642	175.756	198.807	170.274	201.718
sp|Q9R190|MTA2_MOUSE	Mta2	Metastasis-associated protein MTA2 OS=Mus musculus OX=10090 GN=Mta2 PE=1 SV=1	988	7	C	UR	559.635	399.888	159.888	454.29	659.469	582.483	171.557	827.415	822.202	766.735	682.85
sp|Q8K4B0|MTA1_MOUSE	Mta1	Metastasis-associated protein MTA1 OS=Mus musculus OX=10090 GN=Mta1 PE=1 SV=1	988	2	C	UR	249.708	220.496	80.7117	295.54	266.685	369.57	86.1702	346.627	356.954	363.286	258.746
tr|Q3UII8|Q3UII8_MOUSE	Mta3	Metastasis-associated protein MTA3 OS=Mus musculus OX=10090 GN=Mta3 PE=1 SV=1	988	1	C	UR	200.142	143.357	0	185.647	169.677	176.291	8.46687	179.469	172.563	154.554	140.651
sp|Q9D8S4|ORN_MOUSE	Rexo2	Oligoribonuclease, mitochondrial OS=Mus musculus OX=10090 GN=Rexo2 PE=1 SV=2	989	6	C	UR	865.227	1090.37	3148.31	890.297	976.328	1092.24	3750.94	1106.24	864.193	933.68	879.869
sp|Q8CG16|C1RA_MOUSE	C1ra	Complement C1r-A subcomponent OS=Mus musculus OX=10090 GN=C1ra PE=1 SV=1	990	2	C	UR	193.304	239.22	988.68	128.494	116.268	121.664	424.677	114.667	216.483	188.55	121.761
sp|P98083|SHC1_MOUSE	Shc1	SHC-transforming protein 1 OS=Mus musculus OX=10090 GN=Shc1 PE=1 SV=3	991	4	C	UR	188.001	165.155	127.379	182.889	163.247	153.042	140.282	202.222	213.773	192.98	204.996
sp|P12265|BGLR_MOUSE	Gusb	Beta-glucuronidase OS=Mus musculus OX=10090 GN=Gusb PE=1 SV=2	992	8	C	UR	643.499	822.537	2578.29	747.67	955.629	530.726	3086.03	804.711	659.76	694.288	728.607
sp|Q8CFX1|G6PE_MOUSE	H6pd	GDH/6PGL endoplasmic bifunctional protein OS=Mus musculus OX=10090 GN=H6pd PE=1 SV=2	993	5	C	UR	523.113	440.405	774.786	419.819	494.154	487.317	1095.36	477.637	475.445	496.101	521.306
sp|Q924C1|XPO5_MOUSE	Xpo5	Exportin-5 OS=Mus musculus OX=10090 GN=Xpo5 PE=1 SV=1	994	8	C	UR	267.65	254.195	317.632	418.141	245.32	406.768	295.909	402.657	565.342	422.795	305.69
sp|P63085|MK01_MOUSE	Mapk1	Mitogen-activated protein kinase 1 OS=Mus musculus OX=10090 GN=Mapk1 PE=1 SV=3	995	6	C	UR	1527.62	1950.53	590.887	1376.16	1749.58	1429.66	672.542	1664.74	1663.24	1375.31	1448.1
sp|Q63844|MK03_MOUSE	Mapk3	Mitogen-activated protein kinase 3 OS=Mus musculus OX=10090 GN=Mapk3 PE=1 SV=5	995	12	C	UR	1322.97	2005.97	1028.16	1263.29	1119.47	1371.01	793.067	1352.17	1445.22	1192.59	1068.97
sp|Q9D855|QCR7_MOUSE	Uqcrb	Cytochrome b-c1 complex subunit 7 OS=Mus musculus OX=10090 GN=Uqcrb PE=1 SV=3	996	8	C	UR	2150.37	2181.14	2404.38	2241.83	2533.96	1380.4	3001.21	1614.75	965.746	1188.91	1916.04
sp|Q61074|PPM1G_MOUSE	Ppm1g	Protein phosphatase 1G OS=Mus musculus OX=10090 GN=Ppm1g PE=1 SV=3	997	8	C	UR	1285.86	1302.47	256.873	1257.87	2201.82	1138.45	189.736	2070.17	1713.48	1632.57	1707.1
sp|O70423|AOC3_MOUSE	Aoc3	Membrane primary amine oxidase OS=Mus musculus OX=10090 GN=Aoc3 PE=1 SV=3	998	6	C	UR	63.9159	107.926	474.314	152.087	74.2066	1086.61	306.039	74.9802	232.604	316.502	50.1717
sp|Q9QY81|PO210_MOUSE	Nup210	Nuclear pore membrane glycoprotein 210 OS=Mus musculus OX=10090 GN=Nup210 PE=1 SV=2	999	7	C	UR	1163.26	1251.03	1458.22	1596.5	705.486	1190.53	1563.94	535.778	932.605	948.282	660.691
sp|O35047|HOP2_MOUSE	Psmc3ip	Homologous-pairing protein 2 homolog OS=Mus musculus OX=10090 GN=Psmc3ip PE=1 SV=1	1000	1	C	UR	28.993	59.8796	33.9384	50.8839	75.0926	33.2185	14.8675	82.1448	101.829	94.0553	68.8118
tr|D3YYT1|D3YYT1_MOUSE	Glyr1	Putative oxidoreductase GLYR1 OS=Mus musculus OX=10090 GN=Glyr1 PE=1 SV=1	1001	8	C	UR	1046.11	921.676	197.899	956.788	1012.2	1021.41	151.93	831.913	1057.81	863.314	875.636
sp|P29341|PABP1_MOUSE	Pabpc1	Polyadenylate-binding protein 1 OS=Mus musculus OX=10090 GN=Pabpc1 PE=1 SV=2	1002	14	C	UR	1715.89	1573.86	247.101	1732.8	1557.72	1908.88	274.38	3497.02	3379.37	3237.55	3387.63
tr|Q6PHQ9|Q6PHQ9_MOUSE	Pabpc4	Polyadenylate-binding protein OS=Mus musculus OX=10090 GN=Pabpc4 PE=1 SV=1	1002	7	C	UR	403.407	350.079	142.399	513.818	401.27	440.896	126.484	668.73	720.537	647.549	736.139
sp|P23506-2|PIMT_MOUSE	Pcmt1	Isoform 2 of Protein-L-isoaspartate(D-aspartate) O-methyltransferase OS=Mus musculus OX=10090 GN=Pcmt1	1003	6	C	UR	413.877	337.291	144.968	500.799	1100.96	754.061	100.881	918.556	600.21	949.155	843.321
sp|Q6NZB0|DNJC8_MOUSE	Dnajc8	DnaJ homolog subfamily C member 8 OS=Mus musculus OX=10090 GN=Dnajc8 PE=1 SV=2	1004	1	C	UR	430.665	244.003	22.4205	273.651	449.184	495.649	21.8941	799.535	648.96	909.033	489.081
sp|Q60737|CSK21_MOUSE	Csnk2a1	Casein kinase II subunit alpha OS=Mus musculus OX=10090 GN=Csnk2a1 PE=1 SV=2	1005	11	C	UR	1906.85	1823.06	1786	1770.18	2038.27	1187.68	3239.69	1734.01	1276.17	1385.54	1784.57
sp|O54833|CSK22_MOUSE	Csnk2a2	Casein kinase II subunit alpha' OS=Mus musculus OX=10090 GN=Csnk2a2 PE=1 SV=1	1005	5	C	UR	666.624	678.447	1164.9	699.356	680.549	567.696	1400.65	650.187	522.12	512.273	704.669
sp|Q9WV02|RBMX_MOUSE	Rbmx	RNA-binding motif protein, X chromosome OS=Mus musculus OX=10090 GN=Rbmx PE=1 SV=1	1006	3	C	UR	789.192	637.869	77.9023	436.795	769.535	703.001	97.071	1003.11	947.306	991.534	869.199
sp|Q9Z0W3|NU160_MOUSE	Nup160	Nuclear pore complex protein Nup160 OS=Mus musculus OX=10090 GN=Nup160 PE=1 SV=2	1007	6	C	UR	602.102	662.573	686.509	723.974	262.614	675.949	732.441	354.638	604.027	458.29	375.289
sp|P32020|NLTP_MOUSE	Scp2	Non-specific lipid-transfer protein OS=Mus musculus OX=10090 GN=Scp2 PE=1 SV=3	1008	9	C	UR	1154.28	798.244	1367.3	856.165	449.28	657.332	534.203	414.434	604.847	625.222	587.68
sp|P41216|ACSL1_MOUSE	Acsl1	Long-chain-fatty-acid--CoA ligase 1 OS=Mus musculus OX=10090 GN=Acsl1 PE=1 SV=2	1009	5	C	UR	496.842	625.867	891.393	773.613	274.066	1085.87	1069.51	431.082	952.793	1305.38	406.373
sp|Q8JZR0|ACSL5_MOUSE	Acsl5	Long-chain-fatty-acid--CoA ligase 5 OS=Mus musculus OX=10090 GN=Acsl5 PE=1 SV=1	1009	4	C	UR	989.715	683.64	711.604	1094.38	217.581	855.865	550.089	535.376	723.315	708.271	472.706
sp|Q8CG48|SMC2_MOUSE	Smc2	Structural maintenance of chromosomes protein 2 OS=Mus musculus OX=10090 GN=Smc2 PE=1 SV=2	1010	10	C	UR	1722.86	2298.76	330.822	2419.98	1773.03	1478.77	220.962	2127.12	2679.15	2296.89	2043.91
sp|Q8BH35|CO8B_MOUSE	C8b	Complement component C8 beta chain OS=Mus musculus OX=10090 GN=C8b PE=1 SV=1	1011	11	C	UR	1217.71	1626.04	1363.41	1419.11	1069.84	1081.29	1078.3	1191.26	1763.31	1437.84	1804.28
sp|Q99J47|DRS7B_MOUSE	Dhrs7b	Dehydrogenase/reductase SDR family member 7B OS=Mus musculus OX=10090 GN=Dhrs7b PE=1 SV=1	1012	2	C	UR	315.101	272.098	933.371	323.423	44.1862	232.605	1583.8	127.291	191.515	193.828	144.645
sp|P54227|STMN1_MOUSE	Stmn1	Stathmin OS=Mus musculus OX=10090 GN=Stmn1 PE=1 SV=2	1013	2	C	UR	41.1428	73.0375	74.5239	85.769	122.755	17.7997	33.8436	75.1953	115.691	88.501	112.563
tr|D3Z286|D3Z286_MOUSE	Tmppe	Transmembrane protein with metallophosphoesterase domain OS=Mus musculus OX=10090 GN=Tmppe PE=1 SV=2	1014	1	C	UR	29.3709	21.6378	7.53827	24.8833	7.43866	21.8424	5.52743	9.61239	14.6731	11.8875	10.7958
sp|Q8R0I4|TM2D2_MOUSE	Tm2d2	TM2 domain-containing protein 2 OS=Mus musculus OX=10090 GN=Tm2d2 PE=2 SV=1	1015	1	C	UR	24.339	21.3697	180.72	20.1443	5.55658	11.0321	208.256	7.70263	10.9909	10.7553	13.2888
sp|Q6NZL8|SCUB1_MOUSE	Scube1	Signal peptide, CUB and EGF-like domain-containing protein 1 OS=Mus musculus OX=10090 GN=Scube1 PE=2 SV=2	1016	2	C	UR	110.681	139.702	62.0637	100.19	117.116	53.7891	70.9998	94.4718	100.358	96.5957	67.8835
sp|P70698|PYRG1_MOUSE	Ctps1	CTP synthase 1 OS=Mus musculus OX=10090 GN=Ctps1 PE=1 SV=2	1017	5	C	UR	434.781	382.216	219.145	488.136	415.2	457.298	158.025	566.156	609.06	504.281	491.783
sp|P70303|PYRG2_MOUSE	Ctps2	CTP synthase 2 OS=Mus musculus OX=10090 GN=Ctps2 PE=1 SV=1	1017	3	C	UR	450.102	354.966	194.965	376.537	390.232	418.487	140.416	361.338	363.413	352.077	371.367
sp|P43247|MSH2_MOUSE	Msh2	DNA mismatch repair protein Msh2 OS=Mus musculus OX=10090 GN=Msh2 PE=1 SV=1	1018	3	C	UR	174.294	144.327	48.6541	212.165	139.848	190.163	43.5023	163.497	218.433	175.894	128.264
sp|Q0KK56|F184B_MOUSE	Fam184b	Protein FAM184B OS=Mus musculus OX=10090 GN=Fam184b PE=2 SV=1	1019	1	C	UR	4.48138	45.9559	27.5317	41.433	15.6808	1.09643	6.46307	12.1095	7.96983	22.6113	17.5663
sp|Q6PB44|PTN23_MOUSE	Ptpn23	Tyrosine-protein phosphatase non-receptor type 23 OS=Mus musculus OX=10090 GN=Ptpn23 PE=1 SV=2	1020	5	C	UR	300.497	387.931	122.137	308.971	448.274	413.035	144.557	510.595	521.758	461.898	427.581
sp|Q91XB0|TREX1_MOUSE	Trex1	Three-prime repair exonuclease 1 OS=Mus musculus OX=10090 GN=Trex1 PE=1 SV=2	1021	3	C	UR	236.214	207.629	396.766	174.208	266.634	158.723	600.732	252.594	269.168	277.382	243.919
sp|Q810J8|ZFYV1_MOUSE	Zfyve1	Zinc finger FYVE domain-containing protein 1 OS=Mus musculus OX=10090 GN=Zfyve1 PE=1 SV=2	1022	4	C	UR	1111.91	691.109	578.645	1019.46	490.639	982.36	384.04	672.029	756.551	698.745	614.454
sp|Q9CX34|SGT1_MOUSE	Sugt1	Protein SGT1 homolog OS=Mus musculus OX=10090 GN=Sugt1 PE=1 SV=3	1023	2	C	UR	553.102	360.437	117.886	490.61	443.423	583.62	97.2344	546.397	425.916	552.91	447.772
sp|P55937|GOGA3_MOUSE	Golga3	Golgin subfamily A member 3 OS=Mus musculus OX=10090 GN=Golga3 PE=1 SV=3	1024	14	C	UR	1907.23	1552.56	563.552	1599.4	3054.2	2119.22	345.935	3214.15	2486.11	3080.67	3053.52
sp|Q9JII6|AK1A1_MOUSE	Akr1a1	Aldo-keto reductase family 1 member A1 OS=Mus musculus OX=10090 GN=Akr1a1 PE=1 SV=3	1025	10	C	UR	2226.68	2352.08	1117.12	1454.05	2769.27	1287.03	1320.67	1752.37	1164.96	1275.03	1632.58
sp|Q9DCL2|CIA2A_MOUSE	Ciao2a	Cytosolic iron-sulfur assembly component 2A OS=Mus musculus OX=10090 GN=Ciao2a PE=1 SV=1	1026	1	C	UR	97.6417	63.2679	42.3672	86.2591	124.237	118.659	69.2165	131.524	104.42	116.689	103.436
sp|Q9D7I5|LHPP_MOUSE	Lhpp	Phospholysine phosphohistidine inorganic pyrophosphate phosphatase OS=Mus musculus OX=10090 GN=Lhpp PE=1 SV=1	1027	2	C	UR	436.763	532.936	570.432	329.137	654.211	333.085	782.053	375.039	291.105	347.121	357.447
sp|Q80Y81|RNZ2_MOUSE	Elac2	Zinc phosphodiesterase ELAC protein 2 OS=Mus musculus OX=10090 GN=Elac2 PE=1 SV=1	1028	6	C	UR	336.277	411.929	160.574	357.249	450.142	275.274	134.201	424.143	393.998	335.437	406.293
sp|Q9QYY8|SPAST_MOUSE	Spast	Spastin OS=Mus musculus OX=10090 GN=Spast PE=1 SV=3	1029	3	C	UR	210.498	160.224	118.869	164.98	185.299	247.095	77.5204	296.403	260.703	246.273	266.902
sp|P46467|VPS4B_MOUSE	Vps4b	Vacuolar protein sorting-associated protein 4B OS=Mus musculus OX=10090 GN=Vps4b PE=1 SV=2	1029	7	C	UR	1684.63	1245.98	1364.82	1726.12	1274.23	2012.04	749.334	1587.84	1733.49	1671.71	1734.4
sp|Q9CQF3|CPSF5_MOUSE	Nudt21	Cleavage and polyadenylation specificity factor subunit 5 OS=Mus musculus OX=10090 GN=Nudt21 PE=1 SV=1	1030	4	C	UR	1813.45	2050.87	153.813	1568.52	1435.51	1496.66	304.486	1595.93	1435.9	1620.1	1396.84
sp|Q9Z2D3|GSDME_MOUSE	Gsdme	Gasdermin-E OS=Mus musculus OX=10090 GN=Gsdme PE=1 SV=1	1031	6	C	UR	700.705	400.679	421.649	538.352	439.119	879.663	351.793	470.598	422.443	439.183	373.393
sp|A2AT37|RENT2_MOUSE	Upf2	Regulator of nonsense transcripts 2 OS=Mus musculus OX=10090 GN=Upf2 PE=1 SV=1	1032	3	C	UR	213.263	180.871	238.004	269.935	149.514	300.058	275.88	230.738	288.258	240.659	190.028
sp|Q8R1S0|COQ6_MOUSE	Coq6	Ubiquinone biosynthesis monooxygenase COQ6, mitochondrial OS=Mus musculus OX=10090 GN=Coq6 PE=1 SV=3	1033	5	C	UR	877.922	728.85	210.814	763.222	927.497	524.02	325.47	755.184	425.637	506.947	720.599
sp|Q8BJ56|PLPL2_MOUSE	Pnpla2	Patatin-like phospholipase domain-containing protein 2 OS=Mus musculus OX=10090 GN=Pnpla2 PE=1 SV=1	1034	2	C	UR	31.1995	33.5836	14.3078	33.4157	25.9881	45.5724	16.0938	38.6534	44.0882	48.4175	28.5225
sp|P29391|FRIL1_MOUSE	Ftl1	Ferritin light chain 1 OS=Mus musculus OX=10090 GN=Ftl1 PE=1 SV=2	1035	4	C	UR	307.089	305.571	311.883	184.011	241.863	226.762	503.004	225.464	148.52	260.085	201.018
sp|Q8C025|CHPT1_MOUSE	Chpt1	Cholinephosphotransferase 1 OS=Mus musculus OX=10090 GN=Chpt1 PE=1 SV=1	1037	1	C	UR	97.6832	61.8149	29.2206	113.611	41.7756	143.309	19.3868	61.185	115.187	111.351	48.7488
sp|Q9CZU6|CISY_MOUSE	Cs	Citrate synthase, mitochondrial OS=Mus musculus OX=10090 GN=Cs PE=1 SV=1	1038	16	C	UR	2008.71	4363.15	6342.1	2572.21	2718.72	1706.49	7593.26	1956.29	1511.35	1538.75	2438.06
sp|P11835|ITB2_MOUSE	Itgb2	Integrin beta-2 OS=Mus musculus OX=10090 GN=Itgb2 PE=1 SV=2	1039	16	C	UR	654.758	708.472	2832.43	959.94	398.493	680.542	3164.03	543.47	1065.34	1234.43	620.611
sp|O70309-2|ITB5_MOUSE	Itgb5	Isoform Beta-5B of Integrin beta-5 OS=Mus musculus OX=10090 GN=Itgb5	1039	6	C	UR	484.931	411.09	1244.23	474.194	319.664	500.557	1120.01	340.454	496.594	417.293	375.885
sp|P26011|ITB7_MOUSE	Itgb7	Integrin beta-7 OS=Mus musculus OX=10090 GN=Itgb7 PE=1 SV=2	1039	4	C	UR	71.5189	54.666	217.266	72.3195	54.7873	104.372	236.894	90.052	81.2048	64.415	74.2004
sp|Q8CFI7|RPB2_MOUSE	Polr2b	DNA-directed RNA polymerase II subunit RPB2 OS=Mus musculus OX=10090 GN=Polr2b PE=1 SV=2	1040	12	C	UR	1842.88	1623.66	663.261	2397.03	1636.3	2591.19	545.033	1809.52	2180.45	1823.26	1518.72
sp|Q80TA6|MTMRC_MOUSE	Mtmr12	Myotubularin-related protein 12 OS=Mus musculus OX=10090 GN=Mtmr12 PE=1 SV=2	1041	3	C	UR	316.587	266.959	223.242	299.213	349.007	317.488	182.618	320.912	272.968	208.542	306.062
sp|P22437|PGH1_MOUSE	Ptgs1	Prostaglandin G/H synthase 1 OS=Mus musculus OX=10090 GN=Ptgs1 PE=1 SV=1	1042	7	C	UR	647.607	587.145	2536.07	697.767	475.935	1421.15	1672.37	495.427	750.248	747.128	440.551
sp|A2AIG8|1A1L1_MOUSE	Accs	1-aminocyclopropane-1-carboxylate synthase-like protein 1 OS=Mus musculus OX=10090 GN=Accs PE=2 SV=1	1043	1	C	UR	60.0319	49.4371	33.8497	76.382	49.4749	85.1435	22.3885	49.8491	72.2849	63.046	49.4708
sp|Q64378|FKBP5_MOUSE	Fkbp5	Peptidyl-prolyl cis-trans isomerase FKBP5 OS=Mus musculus OX=10090 GN=Fkbp5 PE=1 SV=1	1044	11	C	UR	1179.47	668.13	627.603	954.137	564.43	1354.09	696.26	1220.73	1404.42	1409.16	1019.8
sp|Q8VI56|LRP4_MOUSE	Lrp4	Low-density lipoprotein receptor-related protein 4 OS=Mus musculus OX=10090 GN=Lrp4 PE=1 SV=3	1045	3	C	UR	140.567	145.982	46.1985	157.535	136.289	143.151	53.514	94.7686	112.712	130.953	107.691
sp|Q8K202|RPA49_MOUSE	Polr1e	DNA-directed RNA polymerase I subunit RPA49 OS=Mus musculus OX=10090 GN=Polr1e PE=1 SV=2	1046	2	C	UR	282.149	232.953	560.831	449.175	271.464	476.807	632.552	461.948	583.741	410.927	407.247
sp|Q8VI94|OASL1_MOUSE	Oasl1	2'-5'-oligoadenylate synthase-like protein 1 OS=Mus musculus OX=10090 GN=Oasl1 PE=2 SV=1	1047	4	C	UR	370.104	143.216	103.092	270.185	130.867	499.853	142.971	278.104	235.113	212.293	280.616
sp|Q9Z2F2|OASL2_MOUSE	Oasl2	2'-5'-oligoadenylate synthase-like protein 2 OS=Mus musculus OX=10090 GN=Oasl2 PE=1 SV=2	1047	4	C	UR	675.806	387.606	625.988	512.239	559.333	727.094	802.488	724.566	779.511	640.831	856.923
sp|Q9QUK4|BIR1B_MOUSE	Naip2	Baculoviral IAP repeat-containing protein 1b OS=Mus musculus OX=10090 GN=Naip2 PE=1 SV=2	1048	9	C	UR	1538.44	1187.01	863.012	1594.22	885.336	1478.96	828.772	1269.45	1256.15	1145.7	1173.36
sp|Q9QWK5|BIR1A_MOUSE	Naip1	Baculoviral IAP repeat-containing protein 1a OS=Mus musculus OX=10090 GN=Naip1 PE=2 SV=3	1048	8	C	UR	1034.28	491.859	308.228	778.227	489.832	1041.69	360.269	892.638	840.387	854.884	825.508
sp|Q9R016|BIR1E_MOUSE	Naip5	Baculoviral IAP repeat-containing protein 1e OS=Mus musculus OX=10090 GN=Naip5 PE=1 SV=3	1048	1	C	UR	31.0594	21.781	33.0755	26.8712	20.5132	39.0579	21.6826	30.745	31.5063	22.3076	20.5824
sp|Q60605|MYL6_MOUSE	Myl6	Myosin light polypeptide 6 OS=Mus musculus OX=10090 GN=Myl6 PE=1 SV=3	1049	9	C	UR	555.905	451.792	512.281	770.686	780.51	840.737	498.42	686.001	551.627	557.205	517.267
sp|P05977|MYL1_MOUSE	Myl1	Myosin light chain 1/3, skeletal muscle isoform OS=Mus musculus OX=10090 GN=Myl1 PE=1 SV=2	1049	2	C	UR	98.6512	65.1625	73.3002	125.049	79.2238	121.807	67.2757	117.304	77.5422	105.756	67.0948
sp|Q99J77|SIAS_MOUSE	Nans	Sialic acid synthase OS=Mus musculus OX=10090 GN=Nans PE=1 SV=1	1050	12	C	UR	1553.65	1474.53	377.486	861.745	2803.65	1123.43	210.472	2042.89	1346.99	1342.23	1825.62
sp|Q6PDC8|MFD4A_MOUSE	Mfsd4a	Major facilitator superfamily domain-containing protein 4A OS=Mus musculus OX=10090 GN=Mfsd4a PE=2 SV=2	1051	3	C	UR	76.1249	73.2785	127.825	115.324	45.1014	81.5792	105.835	65.4539	91.4627	53.6574	90.2535
sp|P27808|MGAT1_MOUSE	Mgat1	Alpha-1,3-mannosyl-glycoprotein 2-beta-N-acetylglucosaminyltransferase OS=Mus musculus OX=10090 GN=Mgat1 PE=1 SV=1	1052	4	C	UR	564.363	303.114	844.236	430.582	289.954	460.599	508.951	235.353	299.305	277.673	281.625
sp|Q9Z2I0|LETM1_MOUSE	Letm1	Mitochondrial proton/calcium exchanger protein OS=Mus musculus OX=10090 GN=Letm1 PE=1 SV=1	1053	12	C	UR	1343.86	1099.77	1867	1336.8	799.007	999.59	1103.15	956.702	929.86	1141.25	1067.5
sp|Q07797|LG3BP_MOUSE	Lgals3bp	Galectin-3-binding protein OS=Mus musculus OX=10090 GN=Lgals3bp PE=1 SV=1	1054	14	C	UR	2164.71	1429.57	2550.66	1509.12	1984.29	1026.05	3261.63	1405.8	1192.1	1419.18	1630.13
tr|E9PYD1|E9PYD1_MOUSE	Fam98c	Family with sequence similarity 98, member C OS=Mus musculus OX=10090 GN=Fam98c PE=1 SV=1	1055	2	C	UR	81.8204	47.3749	35.7003	71.3732	53.9276	85.2048	23.367	53.1295	45.5933	53.685	52.793
sp|Q8K297|GT251_MOUSE	Colgalt1	Procollagen galactosyltransferase 1 OS=Mus musculus OX=10090 GN=Colgalt1 PE=1 SV=2	1056	4	C	UR	261.994	217.175	529.764	301.412	149.321	317.423	156.725	206.805	335.518	299.396	213.027
sp|Q9JJD0|THA11_MOUSE	Thap11	THAP domain-containing protein 11 OS=Mus musculus OX=10090 GN=Thap11 PE=1 SV=1	1057	1	C	UR	265.32	186.722	42.6932	274.562	145.003	366.217	30.9978	254.171	275.919	251.251	195.658
sp|P16675|PPGB_MOUSE	Ctsa	Lysosomal protective protein OS=Mus musculus OX=10090 GN=Ctsa PE=1 SV=1	1058	5	C	UR	495.997	636.745	606.327	438.157	567.441	323.455	970.296	388.602	279.074	320.557	379.73
sp|Q8C8U0-3|LIPB1_MOUSE	Ppfibp1	Isoform 3 of Liprin-beta-1 OS=Mus musculus OX=10090 GN=Ppfibp1	1059	4	C	UR	224.152	203.027	90.1887	221.021	206.894	296.143	62.7626	266.919	377.338	315.282	257.117
sp|P63089|PTN_MOUSE	Ptn	Pleiotrophin OS=Mus musculus OX=10090 GN=Ptn PE=1 SV=1	1060	1	C	UR	94.8293	120.792	39.6952	150.079	104.188	131.894	11.5506	73.6808	67.4263	158.472	87.7624
sp|Q6P4T0|ATG2A_MOUSE	Atg2a	Autophagy-related protein 2 homolog A OS=Mus musculus OX=10090 GN=Atg2a PE=1 SV=2	1061	3	C	UR	267.23	303.781	780.081	330.819	132.944	229.333	679.363	183.498	260.058	198.808	200.01
sp|Q8BGS0|MAK16_MOUSE	Mak16	Protein MAK16 homolog OS=Mus musculus OX=10090 GN=Mak16 PE=1 SV=1	1062	1	C	UR	37.1837	54.3258	22.3229	60.8259	36.943	36.563	13.8987	63.1787	53.1545	57.6583	58.3535
sp|Q9D8U8|SNX5_MOUSE	Snx5	Sorting nexin-5 OS=Mus musculus OX=10090 GN=Snx5 PE=1 SV=1	1063	6	C	UR	873.756	995.811	348.7	705.855	1078.13	623.268	252.063	971.618	1180.5	986.574	1140.48
sp|Q6P8X1|SNX6_MOUSE	Snx6	Sorting nexin-6 OS=Mus musculus OX=10090 GN=Snx6 PE=1 SV=2	1063	4	C	UR	824.9	542.056	126.89	566.026	840.913	872.038	159.011	1146.49	813.09	1179.54	874.093
sp|Q8K411|PREP_MOUSE	Pitrm1	Presequence protease, mitochondrial OS=Mus musculus OX=10090 GN=Pitrm1 PE=1 SV=1	1064	25	C	UR	4289.46	4629.22	6113.94	4774.64	5695.04	3564.09	9621.51	4275.1	3148.41	3067.9	4372.92
sp|Q8BTZ7|GMPPB_MOUSE	Gmppb	Mannose-1-phosphate guanyltransferase beta OS=Mus musculus OX=10090 GN=Gmppb PE=1 SV=1	1065	5	C	UR	146.971	172.155	72.3996	126.332	232.075	137.158	125.384	157.058	148.62	114.162	188.952
sp|P97823|LYPA1_MOUSE	Lypla1	Acyl-protein thioesterase 1 OS=Mus musculus OX=10090 GN=Lypla1 PE=1 SV=1	1066	4	C	UR	640.007	879.703	136.063	498.748	764.464	418.744	442.225	562.718	494.92	535.945	667.217
sp|Q99LD4-2|CSN1_MOUSE	Gps1	Isoform 2 of COP9 signalosome complex subunit 1 OS=Mus musculus OX=10090 GN=Gps1	1067	6	C	UR	684.504	592.061	724.991	614.236	701.704	729.654	491.738	640.268	765.089	596.744	668.009
sp|Q80UW8|RPAB1_MOUSE	Polr2e	DNA-directed RNA polymerases I, II, and III subunit RPABC1 OS=Mus musculus OX=10090 GN=Polr2e PE=1 SV=1	1068	3	C	UR	248.166	271.57	108.658	243.501	381.207	191.641	129.661	288.757	231.554	207.546	277.305
sp|Q9QXK7|CPSF3_MOUSE	Cpsf3	Cleavage and polyadenylation specificity factor subunit 3 OS=Mus musculus OX=10090 GN=Cpsf3 PE=1 SV=2	1069	4	C	UR	408.59	360.499	74.5791	497.511	306.86	526.503	130.734	450.574	561.502	529.117	406.104
sp|E9Q4N7|ARI1B_MOUSE	Arid1b	AT-rich interactive domain-containing protein 1B OS=Mus musculus OX=10090 GN=Arid1b PE=1 SV=1	1070	4	C	UR	219.91	153.221	256.509	222.939	228.836	275.09	116.501	227.574	218.258	222.328	203.923
sp|Q9CR67|TMM33_MOUSE	Tmem33	Transmembrane protein 33 OS=Mus musculus OX=10090 GN=Tmem33 PE=1 SV=1	1071	2	C	UR	153.138	137.818	152.822	167.208	30.0407	134.749	267.672	68.0559	140.195	99.1247	64.7328
sp|Q9JJL8|SYSM_MOUSE	Sars2	Serine--tRNA ligase, mitochondrial OS=Mus musculus OX=10090 GN=Sars2 PE=1 SV=2	1072	2	C	UR	70.4775	95.068	12.8687	76.221	79.8588	67.9365	8.26202	84.9729	84.1674	74.1106	87.6765
sp|P40124|CAP1_MOUSE	Cap1	Adenylyl cyclase-associated protein 1 OS=Mus musculus OX=10090 GN=Cap1 PE=1 SV=4	1073	13	C	UR	3180.09	3073.22	985.931	2353.11	3736.28	2980.1	1849.26	3551.34	3011.17	3302.49	4668.74
sp|Q9CYT6|CAP2_MOUSE	Cap2	Adenylyl cyclase-associated protein 2 OS=Mus musculus OX=10090 GN=Cap2 PE=1 SV=1	1073	6	C	UR	519.677	639.387	1570.04	641.007	653.931	2409.31	3462.25	583.82	663.148	1011.2	496.823
sp|Q9QY06-2|MYO9B_MOUSE	Myo9b	Isoform 2 of Unconventional myosin-IXb OS=Mus musculus OX=10090 GN=Myo9b	1074	2	C	UR	297.985	249.781	250.867	363.26	160.83	386.84	243.92	247.723	381.21	289.914	239.938
tr|E9Q3X0|E9Q3X0_MOUSE	Mvp	Major vault protein OS=Mus musculus OX=10090 GN=Mvp PE=1 SV=1	1076	25	C	UR	5001.75	6192.39	556.506	4299.69	6908.31	3007.81	642.952	4415.59	3951.18	3756.35	5496.56
sp|A3KGS3|RGPA2_MOUSE	Ralgapa2	Ral GTPase-activating protein subunit alpha-2 OS=Mus musculus OX=10090 GN=Ralgapa2 PE=1 SV=2	1077	4	C	UR	373.447	302.502	420.559	347.914	220.777	305.766	300.938	259.825	319.261	238.834	260.235
sp|Q6GYP7-2|RGPA1_MOUSE	Ralgapa1	Isoform 2 of Ral GTPase-activating protein subunit alpha-1 OS=Mus musculus OX=10090 GN=Ralgapa1	1077	2	C	UR	196.263	166.266	73.4959	194.951	146.554	184.414	49.3249	165.142	242.207	194.42	191.652
sp|Q9WTK5|NFKB2_MOUSE	Nfkb2	Nuclear factor NF-kappa-B p100 subunit OS=Mus musculus OX=10090 GN=Nfkb2 PE=1 SV=1	1079	8	C	UR	755.258	422.425	181.056	558.265	616.884	677.41	137.015	776.121	850.734	783.605	698.337
sp|Q8K2T1|NMRL1_MOUSE	Nmral1	NmrA-like family domain-containing protein 1 OS=Mus musculus OX=10090 GN=Nmral1 PE=1 SV=1	1080	6	C	UR	550.739	385.907	208.764	541.694	520.419	698.689	278.979	671.562	820.153	622.703	403.348
sp|B9EKI3|TMF1_MOUSE	Tmf1	TATA element modulatory factor OS=Mus musculus OX=10090 GN=Tmf1 PE=1 SV=2	1081	7	C	UR	711.18	551.69	153.667	594.724	749.7	637.502	148.068	872.971	752.887	889.452	754.465
sp|Q8K0Q5|RHG18_MOUSE	Arhgap18	Rho GTPase-activating protein 18 OS=Mus musculus OX=10090 GN=Arhgap18 PE=1 SV=1	1082	3	C	UR	219.416	192.876	657.903	234.522	137.429	254.984	680.713	185.216	202.225	161.812	184.119
sp|Q9WVL1|AP4S1_MOUSE	Ap4s1	AP-4 complex subunit sigma-1 OS=Mus musculus OX=10090 GN=Ap4s1 PE=2 SV=1	1083	1	C	UR	148.147	162.513	67.8196	140.409	131.97	102.764	50.1465	104.803	110.482	116.01	125.1
sp|Q99KB8|GLO2_MOUSE	Hagh	Hydroxyacylglutathione hydrolase, mitochondrial OS=Mus musculus OX=10090 GN=Hagh PE=1 SV=2	1084	6	C	UR	1183.59	1526.26	3261	1061.86	1477.4	801.6	4195.38	1071.13	710.487	985.738	965.029
sp|Q6ZPU9|KBP_MOUSE	Kifbp	KIF-binding protein OS=Mus musculus OX=10090 GN=Kifbp PE=1 SV=2	1085	2	C	UR	18.6659	17.6852	29.3829	24.7937	20.0984	33.1331	9.88812	21.5495	31.7008	33.674	23.9032
sp|O08810|U5S1_MOUSE	Eftud2	116 kDa U5 small nuclear ribonucleoprotein component OS=Mus musculus OX=10090 GN=Eftud2 PE=1 SV=1	1086	16	C	UR	2449.78	2687.04	464.507	2791.05	2274.11	2197.63	589.002	2426.01	2434.8	2097.2	2505.68
sp|P58252|EF2_MOUSE	Eef2	Elongation factor 2 OS=Mus musculus OX=10090 GN=Eef2 PE=1 SV=2	1086	19	C	UR	4341.7	4311.52	3216.16	4280.04	4443.52	3659.86	2638.27	3985.24	4805.8	3609.52	4726.38
sp|Q8VCS3|XYLK_MOUSE	Fam20b	Glycosaminoglycan xylosylkinase OS=Mus musculus OX=10090 GN=Fam20b PE=1 SV=1	1087	6	C	UR	999.849	600.858	1981.49	773.858	367.545	745.112	1250.28	386.867	402.081	399.879	425.843
sp|Q3URS9|MITOK_MOUSE	Ccdc51	Mitochondrial potassium channel OS=Mus musculus OX=10090 GN=Ccdc51 PE=1 SV=1	1088	5	C	UR	618.009	526.986	103.54	551.449	333.304	503.81	70.1004	282.909	284.872	281.88	347.113
sp|Q9EQI8|RM46_MOUSE	Mrpl46	39S ribosomal protein L46, mitochondrial OS=Mus musculus OX=10090 GN=Mrpl46 PE=1 SV=1	1089	3	C	UR	214.494	222.599	92.4559	252.393	332.193	128.434	71.7198	255.9	193.588	182.456	308.021
sp|P04919|B3AT_MOUSE	Slc4a1	Band 3 anion transport protein OS=Mus musculus OX=10090 GN=Slc4a1 PE=1 SV=1	1090	4	C	UR	289.035	212.482	185.687	254.895	197.119	307.856	149.531	158.977	498.365	342.477	279.346
sp|O35405|PLD3_MOUSE	Pld3	5'-3' exonuclease PLD3 OS=Mus musculus OX=10090 GN=Pld3 PE=1 SV=1	1091	3	C	UR	112.912	137.64	212.162	108.191	155.422	93.0607	158.006	114.01	115.007	94.0195	117.982
sp|Q80X19|COEA1_MOUSE	Col14a1	Collagen alpha-1(XIV) chain OS=Mus musculus OX=10090 GN=Col14a1 PE=1 SV=2	1092	9	C	UR	392.033	585.754	1722.5	600.27	618.163	4968.52	2437.65	338.78	499.668	1530.39	283.925
sp|Q6PDH0-2|PHLB1_MOUSE	Phldb1	Isoform 2 of Pleckstrin homology-like domain family B member 1 OS=Mus musculus OX=10090 GN=Phldb1	1093	3	C	UR	112.592	107.44	86.3894	91.2969	202.409	133.961	44.3073	194.167	168.475	170.038	162.716
sp|Q8BHN1|TXLNG_MOUSE	Txlng	Gamma-taxilin OS=Mus musculus OX=10090 GN=Txlng PE=1 SV=1	1094	3	C	UR	278.941	188.187	100.406	252.565	190.989	268.362	65.7007	201.326	244.062	236.828	149.931
sp|Q8BVA4|LMOD1_MOUSE	Lmod1	Leiomodin-1 OS=Mus musculus OX=10090 GN=Lmod1 PE=1 SV=1	1095	3	C	UR	41.6042	53.6083	305.904	112.22	29.0519	861.676	227.251	51.6595	190.131	348.039	31.0712
sp|P29416|HEXA_MOUSE	Hexa	Beta-hexosaminidase subunit alpha OS=Mus musculus OX=10090 GN=Hexa PE=1 SV=2	1096	14	C	UR	1269.99	1695.76	2389.58	1232.54	2243.55	941.904	2758.16	1133.35	984.81	1121.43	1207.02
sp|Q924H9|DQX1_MOUSE	Dqx1	ATP-dependent RNA helicase DQX1 OS=Mus musculus OX=10090 GN=Dqx1 PE=2 SV=1	1097	4	C	UR	767.632	740.447	207.392	570.831	701.412	541.521	220.677	634.528	416.794	528.061	629.253
sp|Q91V24|ABCA7_MOUSE	Abca7	ATP-binding cassette sub-family A member 7 OS=Mus musculus OX=10090 GN=Abca7 PE=1 SV=1	1098	1	C	UR	16.6185	11.1584	26.9543	24.623	14.8098	27.2531	7.1909	15.6528	13.3213	14.4327	11.9353
sp|Q810B6|ANFY1_MOUSE	Ankfy1	Rabankyrin-5 OS=Mus musculus OX=10090 GN=Ankfy1 PE=1 SV=2	1099	10	C	UR	1618.21	829.484	1050.06	1372.36	1015.35	1967.98	841.275	1374.53	1463.07	1370.55	1202.68
tr|Q6DFZ1|Q6DFZ1_MOUSE	Gbf1	Golgi-specific brefeldin A-resistance factor 1 OS=Mus musculus OX=10090 GN=Gbf1 PE=1 SV=1	1100	3	C	UR	968.474	618.741	653.987	950.139	418.949	1221.95	611.062	577.059	640.374	544.515	509.609
sp|P07356|ANXA2_MOUSE	Anxa2	Annexin A2 OS=Mus musculus OX=10090 GN=Anxa2 PE=1 SV=2	1101	25	C	UR	4008.71	4100.89	7527.01	4594.42	3397.11	2346.27	2295.15	3279.41	2852.64	2373.4	5638.86
tr|E9Q366|E9Q366_MOUSE	Speer4f2	Spermatogenesis-associated glutamate (E)-rich protein 4f2 OS=Mus musculus OX=10090 GN=Speer4f2 PE=4 SV=2	1102	2	C	UR	85.284	85.2605	165.877	91.0121	111.34	75.2586	121.991	67.8898	72.9287	66.7424	70.937
sp|Q8BMS1|ECHA_MOUSE	Hadha	Trifunctional enzyme subunit alpha, mitochondrial OS=Mus musculus OX=10090 GN=Hadha PE=1 SV=1	1103	18	C	UR	5086.76	5702.37	2727.44	5237.93	4951.84	2964.38	1583.31	3521.38	2954.82	2542.15	3570.7
sp|Q9Z1Q2|ABHGA_MOUSE	Abhd16a	Phosphatidylserine lipase ABHD16A OS=Mus musculus OX=10090 GN=Abhd16a PE=1 SV=3	1104	8	C	UR	492.749	356.36	883.289	501.433	104.36	525.081	672.561	234.103	378.944	314.393	209.708
sp|Q8BP47|SYNC_MOUSE	NARS1	Asparagine--tRNA ligase, cytoplasmic OS=Mus musculus OX=10090 GN=NARS1 PE=1 SV=2	1105	13	C	UR	1378.84	1091.62	854.997	1396.18	980.415	1513.76	400.611	1161.83	1477.45	1204.72	1176.9
sp|P02663|CASA2_BOVIN_contaminant	CSN1S2	Alpha-S2-casein OS=Bos taurus GN=CSN1S2 PE=1 SV=2	1106	3	C	UR	60.518	80.368	181.464	95.6006	752.117	149.578	144.67	667.292	96.2527	55.792	84.9294
sp|Q80X80|C2C2L_MOUSE	C2cd2l	Phospholipid transfer protein C2CD2L OS=Mus musculus OX=10090 GN=C2cd2l PE=1 SV=3	1107	4	C	UR	403.458	403.541	160.14	494.779	201.104	450.814	69.7014	199.164	423.038	299.404	338.766
sp|Q8C5H8|NAKD2_MOUSE	Nadk2	NAD kinase 2, mitochondrial OS=Mus musculus OX=10090 GN=Nadk2 PE=1 SV=2	1108	6	C	UR	451.151	434.572	447.285	467.64	513.867	423.598	680.949	508.95	454.557	476.351	583.924
sp|Q8CI75-2|DI3L2_MOUSE	Dis3l2	Isoform 2 of DIS3-like exonuclease 2 OS=Mus musculus OX=10090 GN=Dis3l2	1109	9	C	UR	1272.32	1649.75	371.822	1134.39	1775.62	1073.78	483.893	1306.43	1041.5	1007.02	1287.74
sp|P97290|IC1_MOUSE	Serping1	Plasma protease C1 inhibitor OS=Mus musculus OX=10090 GN=Serping1 PE=1 SV=3	1110	8	C	UR	729.133	841.52	4214.51	706.798	594.436	599.212	3238.76	539.62	964.937	957.419	807.304
sp|Q9EQJ0|TPC1_MOUSE	Tpcn1	Two pore calcium channel protein 1 OS=Mus musculus OX=10090 GN=Tpcn1 PE=1 SV=1	1111	1	C	UR	35.0926	35.1206	44.5438	46.7272	13.0656	42.9628	25.9024	19.4619	37.502	29.2829	21.2455
sp|P59325|IF5_MOUSE	Eif5	Eukaryotic translation initiation factor 5 OS=Mus musculus OX=10090 GN=Eif5 PE=1 SV=1	1112	4	C	UR	317.956	284.661	339.715	435.727	286.976	444.492	160.913	409.537	437.887	414.354	354.503
sp|Q8R105|VP37C_MOUSE	Vps37c	Vacuolar protein sorting-associated protein 37C OS=Mus musculus OX=10090 GN=Vps37c PE=1 SV=1	1113	3	C	UR	99.3892	79.075	53.5726	83.8602	153.488	71.4075	54.3591	135.198	99.294	114.807	133.988
sp|Q9DBJ1|PGAM1_MOUSE	Pgam1	Phosphoglycerate mutase 1 OS=Mus musculus OX=10090 GN=Pgam1 PE=1 SV=3	1114	9	C	UR	941.617	943.459	131.077	729.833	1163.21	706.175	142.691	973.066	712.01	694.146	813.214
sp|Q9JHK4|PGTA_MOUSE	Rabggta	Geranylgeranyl transferase type-2 subunit alpha OS=Mus musculus OX=10090 GN=Rabggta PE=1 SV=1	1115	5	C	UR	476.496	491.033	193.715	432.034	686.621	402.242	168.516	493.106	514.283	412.838	543.81
tr|F6TQW2|F6TQW2_MOUSE	Ighg2c	Immunoglobulin heavy constant gamma 2C (Fragment) OS=Mus musculus OX=10090 GN=Ighg2c PE=1 SV=2	1116	3	C	UR	239.564	390.235	1687.39	192.152	502.481	353.38	2506.01	488.464	620.248	705.723	591.085
sp|Q61037|TSC2_MOUSE	Tsc2	Tuberin OS=Mus musculus OX=10090 GN=Tsc2 PE=1 SV=1	1117	2	C	UR	301.124	268.313	526.162	367.194	167.868	380.592	543.783	217.333	345.104	252.32	231.269
sp|P70268-2|PKN1_MOUSE	Pkn1	Isoform 2 of Serine/threonine-protein kinase N1 OS=Mus musculus OX=10090 GN=Pkn1	1118	2	C	UR	121.833	153.06	187.865	142.627	104.057	179.654	162.95	144.396	184.095	140.574	138.583
sp|Q8BWW9|PKN2_MOUSE	Pkn2	Serine/threonine-protein kinase N2 OS=Mus musculus OX=10090 GN=Pkn2 PE=1 SV=3	1118	6	C	UR	528.506	524.42	353.161	527.247	436.881	621.127	373.719	532.721	637.873	573.093	544.547
sp|Q99KP6|PRP19_MOUSE	Prpf19	Pre-mRNA-processing factor 19 OS=Mus musculus OX=10090 GN=Prpf19 PE=1 SV=1	1119	15	C	UR	1915.81	1730.46	365.519	1473.96	2668.85	1785.39	546.718	2181.09	1926.69	1971.29	2053.99
sp|Q7TT50|MRCKB_MOUSE	Cdc42bpb	Serine/threonine-protein kinase MRCK beta OS=Mus musculus OX=10090 GN=Cdc42bpb PE=1 SV=2	1120	11	C	UR	1024.56	865.551	1137.96	1068.16	671.521	1120.61	765.546	872.831	1019.46	984.926	944.344
sp|Q3UU96|MRCKA_MOUSE	Cdc42bpa	Serine/threonine-protein kinase MRCK alpha OS=Mus musculus OX=10090 GN=Cdc42bpa PE=1 SV=2	1120	5	C	UR	498.531	430.88	513.144	546.731	338.589	601.008	354.37	455.003	538.347	517.726	454.689
sp|Q810A7|DDX42_MOUSE	Ddx42	ATP-dependent RNA helicase DDX42 OS=Mus musculus OX=10090 GN=Ddx42 PE=1 SV=3	1121	15	C	UR	2957.13	2049.47	415.673	1972.29	2765.6	2167.94	719.423	3087.18	2660.32	2349.67	2292.05
sp|Q8BH15|CNO10_MOUSE	Cnot10	CCR4-NOT transcription complex subunit 10 OS=Mus musculus OX=10090 GN=Cnot10 PE=1 SV=1	1122	1	C	UR	77.9823	45.4553	21.5754	99.3052	50.0719	129.612	9.71037	92.8153	102.958	88.5763	71.2782
sp|P80317|TCPZ_MOUSE	Cct6a	T-complex protein 1 subunit zeta OS=Mus musculus OX=10090 GN=Cct6a PE=1 SV=3	1123	12	C	UR	1692.38	2248.71	572.337	2097.89	2656.14	1875.33	547.321	2505.21	2335.08	2198.16	2538.37
sp|Q8BX10|PGAM5_MOUSE	Pgam5	Serine/threonine-protein phosphatase PGAM5, mitochondrial OS=Mus musculus OX=10090 GN=Pgam5 PE=1 SV=1	1124	2	C	UR	130.088	138.562	157.331	115.187	223.14	60.0909	130.08	214.593	128.199	148.317	219.654
sp|Q9EPB5|SERHL_MOUSE	Serhl	Serine hydrolase-like protein OS=Mus musculus OX=10090 GN=Serhl PE=1 SV=1	1125	6	C	UR	1972.02	1397.08	453.53	1322.84	2522.48	961.73	150.01	1874.8	1104.55	1186.5	2004.08
sp|Q65Z40|WAPL_MOUSE	Wapl	Wings apart-like protein homolog OS=Mus musculus OX=10090 GN=Wapl PE=1 SV=2	1126	5	C	UR	291.019	187.611	98.391	262.402	134.52	409.466	107.186	245.003	283.346	237.15	182.72
sp|P42125|ECI1_MOUSE	Eci1	Enoyl-CoA delta isomerase 1, mitochondrial OS=Mus musculus OX=10090 GN=Eci1 PE=1 SV=2	1127	11	C	UR	4547.63	3653.03	2590.06	4550.8	4199.97	3188.21	1129.61	3136.13	2263.01	2398.52	3170.94
sp|Q8C7R4|UBA6_MOUSE	Uba6	Ubiquitin-like modifier-activating enzyme 6 OS=Mus musculus OX=10090 GN=Uba6 PE=1 SV=1	1128	8	C	UR	845.189	594.905	291.106	873.66	710.881	1077.98	444.783	937.324	1030.55	907.916	898.237
sp|Q9D8Y1|T126A_MOUSE	Tmem126a	Transmembrane protein 126A OS=Mus musculus OX=10090 GN=Tmem126a PE=1 SV=1	1129	1	C	UR	40.76	26.2199	115.035	35.8036	12.1372	36.9585	35.5048	20.862	20.2736	28.7282	20.3127
sp|P47934|CACP_MOUSE	Crat	Carnitine O-acetyltransferase OS=Mus musculus OX=10090 GN=Crat PE=1 SV=3	1130	8	C	UR	1524.93	2499.78	1352.29	1612.24	1777.36	1247.08	1063.2	1469.04	1180	1310.03	1254.71
sp|A6H8H2-2|DEN4C_MOUSE	Dennd4c	Isoform 2 of DENN domain-containing protein 4C OS=Mus musculus OX=10090 GN=Dennd4c	1131	8	C	UR	1116.54	762.65	765.82	1128.67	692.263	1320.99	664.072	982.859	996.036	988.731	877.581
sp|Q61097|KSR1_MOUSE	Ksr1	Kinase suppressor of Ras 1 OS=Mus musculus OX=10090 GN=Ksr1 PE=1 SV=1	1132	3	C	UR	268.57	146.075	241.73	207.11	136.503	253.284	151.081	212.963	286.807	259.276	237.006
sp|Q61753|SERA_MOUSE	Phgdh	D-3-phosphoglycerate dehydrogenase OS=Mus musculus OX=10090 GN=Phgdh PE=1 SV=3	1133	3	C	UR	135.118	113.74	61.1962	190.661	216.828	359.997	73.0931	320.028	478.316	432.846	302.546
sp|Q91XE8|TM205_MOUSE	Tmem205	Transmembrane protein 205 OS=Mus musculus OX=10090 GN=Tmem205 PE=1 SV=1	1134	2	C	UR	372.365	329.336	280.593	512.852	83.3856	557.483	227.479	170.172	370.687	328.458	164.417
sp|Q9JLV5|CUL3_MOUSE	Cul3	Cullin-3 OS=Mus musculus OX=10090 GN=Cul3 PE=1 SV=1	1135	7	C	UR	902.493	821.947	400.892	853.533	774.743	1134.46	319.061	895.675	1188.49	1082.5	789.287
tr|Q8K094|Q8K094_MOUSE	Pvr	Poliovirus receptor OS=Mus musculus OX=10090 GN=Pvr PE=1 SV=1	1136	4	C	UR	140.459	131.971	36.5855	124.48	135.092	103.024	24.7502	125.69	109.705	121.644	149.737
sp|Q8BJY1|PSMD5_MOUSE	Psmd5	26S proteasome non-ATPase regulatory subunit 5 OS=Mus musculus OX=10090 GN=Psmd5 PE=1 SV=4	1137	7	C	UR	1425.38	1510.47	301.241	1358.72	1922.75	1577.69	243.647	1776.78	1706.87	1474.95	1554.49
sp|Q8BK72|RT27_MOUSE	Mrps27	28S ribosomal protein S27, mitochondrial OS=Mus musculus OX=10090 GN=Mrps27 PE=1 SV=2	1138	6	C	UR	622.635	671.383	136.041	672.665	688.473	483.63	119.47	596.657	518.113	514.04	718.298
sp|Q9DBM2|ECHP_MOUSE	Ehhadh	Peroxisomal bifunctional enzyme OS=Mus musculus OX=10090 GN=Ehhadh PE=1 SV=4	1139	13	C	UR	1324.6	1504.02	1049.18	1680.53	560.973	834.937	296.12	749.329	875.455	787.493	857.745
sp|Q8BTX9|HSDL1_MOUSE	Hsdl1	Inactive hydroxysteroid dehydrogenase-like protein 1 OS=Mus musculus OX=10090 GN=Hsdl1 PE=1 SV=1	1140	1	C	UR	151.683	127.73	42.1501	180.907	60.0188	193.766	66.0799	79.2809	141.075	142.102	91.0927
sp|P48758|CBR1_MOUSE	Cbr1	Carbonyl reductase [NADPH] 1 OS=Mus musculus OX=10090 GN=Cbr1 PE=1 SV=3	1141	13	C	UR	3483.45	2152.89	1107.19	3533.43	1985.3	3001.43	752.888	2324.3	2337.96	2087.59	1782.11
sp|Q8K354|CBR3_MOUSE	Cbr3	Carbonyl reductase [NADPH] 3 OS=Mus musculus OX=10090 GN=Cbr3 PE=1 SV=1	1141	3	C	UR	504.491	387.129	298.008	682.591	605.8	723.804	167.547	671.834	540.994	523.433	426.241
sp|Q9R1P4|PSA1_MOUSE	Psma1	Proteasome subunit alpha type-1 OS=Mus musculus OX=10090 GN=Psma1 PE=1 SV=1	1142	14	C	UR	1322.78	1518.25	4372.8	1184.51	1704.3	970.057	6211.42	1461.39	1130.84	1194.26	1220.47
sp|P61979-2|HNRPK_MOUSE	Hnrnpk	Isoform 2 of Heterogeneous nuclear ribonucleoprotein K OS=Mus musculus OX=10090 GN=Hnrnpk	1143	9	C	UR	1325.74	1784.37	319.573	1365.75	1534.42	1385.09	229.715	1901.5	2026.32	2033.3	2034.45
sp|Q9WV91|FPRP_MOUSE	Ptgfrn	Prostaglandin F2 receptor negative regulator OS=Mus musculus OX=10090 GN=Ptgfrn PE=1 SV=2	1144	12	C	UR	1671.86	2011.45	1921.77	2314.33	1813.9	2005.09	3830.72	1548.75	1578.3	1417.17	1903.2
sp|Q8VDF2|UHRF1_MOUSE	Uhrf1	E3 ubiquitin-protein ligase UHRF1 OS=Mus musculus OX=10090 GN=Uhrf1 PE=1 SV=2	1145	3	C	UR	298.524	373.028	123.992	544.407	495.681	223.241	76.4936	373.832	419.905	343.123	322.626
sp|Q8R422|CD109_MOUSE	Cd109	CD109 antigen OS=Mus musculus OX=10090 GN=Cd109 PE=1 SV=1	1146	6	C	UR	421.99	346.844	1200.37	436.385	336.643	1979.38	1827.56	475.691	520.78	607.823	294.245
sp|Q8BGR2|LRC8D_MOUSE	Lrrc8d	Volume-regulated anion channel subunit LRRC8D OS=Mus musculus OX=10090 GN=Lrrc8d PE=1 SV=1	1147	2	C	UR	207.442	110.881	200.098	259.242	73.1188	284.346	77.6545	169.859	302.579	218.293	148.942
sp|Q80WG5|LRC8A_MOUSE	Lrrc8a	Volume-regulated anion channel subunit LRRC8A OS=Mus musculus OX=10090 GN=Lrrc8a PE=1 SV=1	1147	5	C	UR	235.07	211.796	378.728	327.711	139.152	341.373	229.762	213.76	332.903	264.005	233.247
sp|Q8R502|LRC8C_MOUSE	Lrrc8c	Volume-regulated anion channel subunit LRRC8C OS=Mus musculus OX=10090 GN=Lrrc8c PE=1 SV=1	1147	2	C	UR	129.192	127.911	347.266	171.334	120.666	215.37	206.274	160.195	318.143	303.31	138.692
sp|Q66JT1|LRC8E_MOUSE	Lrrc8e	Volume-regulated anion channel subunit LRRC8E OS=Mus musculus OX=10090 GN=Lrrc8e PE=2 SV=2	1147	2	C	UR	116.189	99.3914	181.001	138.85	78.9635	124.786	108.419	92.7696	122.651	91.5827	117.944
sp|Q62165|DAG1_MOUSE	Dag1	Dystroglycan OS=Mus musculus OX=10090 GN=Dag1 PE=1 SV=4	1148	5	C	UR	435.073	512.131	1054.56	357.007	585.815	576.557	1025.12	382.477	383.695	384.811	356.234
sp|P09581|CSF1R_MOUSE	Csf1r	Macrophage colony-stimulating factor 1 receptor OS=Mus musculus OX=10090 GN=Csf1r PE=1 SV=3	1149	1	C	UR	16.097	14.9687	8.36325	21.447	21.1002	20.5304	8.72613	24.5042	31.782	27.8602	21.4548
sp|P55288|CAD11_MOUSE	Cdh11	Cadherin-11 OS=Mus musculus OX=10090 GN=Cdh11 PE=1 SV=1	1150	1	C	UR	76.1762	108.536	45.7382	126.139	50.8148	70.8772	19.2919	60.8058	125.818	158.747	68.7997
sp|Q91VI7|RINI_MOUSE	Rnh1	Ribonuclease inhibitor OS=Mus musculus OX=10090 GN=Rnh1 PE=1 SV=1	1151	11	C	UR	1049.64	1689.99	249.906	1205.59	1523.69	861.995	761.48	1624.41	1572.83	1581.95	1636.41
sp|P20029|BIP_MOUSE	Hspa5	Endoplasmic reticulum chaperone BiP OS=Mus musculus OX=10090 GN=Hspa5 PE=1 SV=3	1152	38	C	UR	4869.9	5837.3	11283.7	5681.02	5913.5	4103.29	12565.5	5379.77	4728.96	4759.2	5241.79
sp|P17879|HS71B_MOUSE	Hspa1b	Heat shock 70 kDa protein 1B OS=Mus musculus OX=10090 GN=Hspa1b PE=1 SV=3	1152	13	C	UR	1243.66	1356.21	1301.82	1336.63	1180.16	1166.17	849.78	1460.88	1516.06	1615.42	1470.02
sp|P38647|GRP75_MOUSE	Hspa9	Stress-70 protein, mitochondrial OS=Mus musculus OX=10090 GN=Hspa9 PE=1 SV=3	1152	23	C	UR	2233.27	3449.42	5396.26	2520.9	2680.07	1385.47	6151.93	2034.24	1573.54	1736.69	2084.59
sp|P63017|HSP7C_MOUSE	Hspa8	Heat shock cognate 71 kDa protein OS=Mus musculus OX=10090 GN=Hspa8 PE=1 SV=1	1152	33	C	UR	4063.3	9262.75	6874.65	5175.22	5482.54	2996.66	8033.92	4976.2	4745.04	4598.48	4418.11
sp|P17156|HSP72_MOUSE	Hspa2	Heat shock-related 70 kDa protein 2 OS=Mus musculus OX=10090 GN=Hspa2 PE=1 SV=2	1152	3	C	UR	295.186	338.752	74.4382	384.525	313.881	765.478	67.62	378.756	409.545	810.096	271.884
sp|P16627|HS71L_MOUSE	Hspa1l	Heat shock 70 kDa protein 1-like OS=Mus musculus OX=10090 GN=Hspa1l PE=1 SV=4	1152	1	C	UR	34.5827	43.7049	151.615	36.1514	42.6584	27.2094	190.021	49.7317	29.2141	27.2187	35.0938
sp|Q9JLI8|SART3_MOUSE	Sart3	Squamous cell carcinoma antigen recognized by T-cells 3 OS=Mus musculus OX=10090 GN=Sart3 PE=1 SV=1	1153	7	C	UR	1290.59	1101.34	684.773	1019.41	1008.67	1390.2	816.013	1151.03	1115.53	1076.71	1116.75
sp|P17742|PPIA_MOUSE	Ppia	Peptidyl-prolyl cis-trans isomerase A OS=Mus musculus OX=10090 GN=Ppia PE=1 SV=2	1154	14	C	UR	1517.71	6756.2	639.713	1937.69	2314.89	1060	614.881	1437.62	1167.58	1849.99	1338.08
sp|O35955|PSB10_MOUSE	Psmb10	Proteasome subunit beta type-10 OS=Mus musculus OX=10090 GN=Psmb10 PE=1 SV=1	1155	4	C	UR	716.944	636.396	459.12	550.1	923.642	591.18	1179.79	896.119	613.382	692.118	622.484
sp|Q8C9S4|CC186_MOUSE	Ccdc186	Coiled-coil domain-containing protein 186 OS=Mus musculus OX=10090 GN=Ccdc186 PE=1 SV=2	1156	3	C	UR	377.292	370.097	301.32	286.131	223.903	273.188	146.505	258.433	281.939	250.17	273.218
sp|Q9JJF3|RIOX1_MOUSE	Riox1	Ribosomal oxygenase 1 OS=Mus musculus OX=10090 GN=Riox1 PE=1 SV=2	1157	2	C	UR	510.529	380.124	9.83241	608.291	841.838	645.546	21.8152	833.037	635.593	646.806	772.675
sp|Q9CW46|RAVR1_MOUSE	Raver1	Ribonucleoprotein PTB-binding 1 OS=Mus musculus OX=10090 GN=Raver1 PE=1 SV=2	1158	5	C	UR	229.766	299.117	93.3062	177.495	254.741	207.047	90.9212	275.734	227.444	221.839	199.189
sp|Q8BRF7|SCFD1_MOUSE	Scfd1	Sec1 family domain-containing protein 1 OS=Mus musculus OX=10090 GN=Scfd1 PE=1 SV=1	1159	4	C	UR	800.136	421.66	690.761	593.912	519.114	876.543	388.732	784.939	743.904	693.359	665.649
sp|Q8K3K8|OPTN_MOUSE	Optn	Optineurin OS=Mus musculus OX=10090 GN=Optn PE=1 SV=1	1160	2	C	UR	128.38	138.33	122.152	127.206	170.558	123.015	87.5062	359.719	279.852	412.058	368.301
sp|Q64285|CEL_MOUSE	Cel	Bile salt-activated lipase OS=Mus musculus OX=10090 GN=Cel PE=1 SV=1	1161	4	C	UR	91.9209	125.819	5098.58	268.742	91.2945	63.465	4561.73	112.208	94.5638	90.4494	175.326
sp|Q9D0L7|ARM10_MOUSE	Armc10	Armadillo repeat-containing protein 10 OS=Mus musculus OX=10090 GN=Armc10 PE=1 SV=1	1162	6	C	UR	456.862	189.109	291.116	289.57	292.435	637.811	192.462	322.863	383.159	376.101	347.954
sp|Q6ZQ38|CAND1_MOUSE	Cand1	Cullin-associated NEDD8-dissociated protein 1 OS=Mus musculus OX=10090 GN=Cand1 PE=1 SV=2	1163	19	C	UR	3682.42	3339.98	2971.55	3631.97	3373.54	5527.89	2034.17	3608.31	4499.25	4005.66	3122.47
sp|Q9ERK4|XPO2_MOUSE	Cse1l	Exportin-2 OS=Mus musculus OX=10090 GN=Cse1l PE=1 SV=1	1164	7	C	UR	1588.52	695.977	1012.64	1302.99	1020.22	2115.02	1057.57	1312.47	1278.75	1026.36	901.453
sp|Q8R3Q0|SARAF_MOUSE	Saraf	Store-operated calcium entry-associated regulatory factor OS=Mus musculus OX=10090 GN=Saraf PE=1 SV=2	1165	4	C	UR	398.091	315.166	1848.51	385.702	82.4471	343.212	1462.66	188.72	288.645	234.795	157.384
sp|Q9DBZ5|EIF3K_MOUSE	Eif3k	Eukaryotic translation initiation factor 3 subunit K OS=Mus musculus OX=10090 GN=Eif3k PE=1 SV=1	1166	9	C	UR	734.02	645.598	113.079	728.519	1561.93	626.445	104.896	1074.66	650.666	784.564	1049.13
sp|Q8K0G5|EIPR1_MOUSE	Eipr1	EARP and GARP complex-interacting protein 1 OS=Mus musculus OX=10090 GN=Eipr1 PE=1 SV=2	1167	1	C	UR	19.754	13.2784	9.85208	22.5485	24.6055	31.262	4.47682	25.1859	20.9277	24.5801	21.5032
sp|Q9JI75|NQO2_MOUSE	Nqo2	Ribosyldihydronicotinamide dehydrogenase [quinone] OS=Mus musculus OX=10090 GN=Nqo2 PE=1 SV=3	1168	8	C	UR	698.735	792.803	150.371	466.195	942.29	503.273	235.673	592.263	615.701	590.938	608.287
sp|Q04519|ASM_MOUSE	Smpd1	Sphingomyelin phosphodiesterase OS=Mus musculus OX=10090 GN=Smpd1 PE=1 SV=2	1169	1	C	UR	44.3997	46.0541	85.4244	43.1859	61.7461	39.927	106.602	35.3893	38.8278	37.1959	34.49
sp|Q6P069|SORCN_MOUSE	Sri	Sorcin OS=Mus musculus OX=10090 GN=Sri PE=1 SV=1	1170	8	C	UR	342.77	1184.73	526.283	525.238	376.705	192.859	543.084	309.182	270.949	343.117	370.945
sp|Q99KE1|MAOM_MOUSE	Me2	NAD-dependent malic enzyme, mitochondrial OS=Mus musculus OX=10090 GN=Me2 PE=1 SV=1	1171	15	C	UR	1328.59	1824.15	1211.82	1353.54	1715.55	1131	2222.02	1520.8	868.503	1046.96	1485.86
sp|G5E870|TRIPC_MOUSE	Trip12	E3 ubiquitin-protein ligase TRIP12 OS=Mus musculus OX=10090 GN=Trip12 PE=1 SV=1	1173	3	C	UR	189.336	143.536	61.0646	191.685	190.093	292.641	57.6749	217.398	280.603	264.433	218.873
sp|Q9R008|KIME_MOUSE	Mvk	Mevalonate kinase OS=Mus musculus OX=10090 GN=Mvk PE=1 SV=1	1174	3	C	UR	424.118	238.931	169.972	346.774	340.665	446.215	272.158	358.565	270.533	243.268	339.241
sp|P14131|RS16_MOUSE	Rps16	40S ribosomal protein S16 OS=Mus musculus OX=10090 GN=Rps16 PE=1 SV=4	1175	6	C	UR	1279.4	1567.39	810.299	1592.6	1138.03	1635.87	900.96	1821.41	1517.45	1462.63	1475.27
sp|Q9QXT0|CNPY2_MOUSE	Cnpy2	Protein canopy homolog 2 OS=Mus musculus OX=10090 GN=Cnpy2 PE=1 SV=1	1176	4	C	UR	171.311	151.613	96.3453	148.562	300.231	130.158	94.7715	251.052	185.355	223.795	233.231
sp|O88207|CO5A1_MOUSE	Col5a1	Collagen alpha-1(V) chain OS=Mus musculus OX=10090 GN=Col5a1 PE=1 SV=2	1177	2	C	UR	390.581	315.002	214.636	241.318	340.569	254.4	251.397	263.678	568.312	456.32	264.748
sp|Q61687|ATRX_MOUSE	Atrx	Transcriptional regulator ATRX OS=Mus musculus OX=10090 GN=Atrx PE=1 SV=3	1178	7	C	UR	364.112	279.101	159.25	427.557	401.311	540.044	101.607	543.451	579.734	595.381	427.235
sp|A2AQ25|SKT_MOUSE	Skt	Sickle tail protein OS=Mus musculus OX=10090 GN=Skt PE=1 SV=1	1179	9	C	UR	1274.31	1036.56	434.558	1138.1	902.704	1098.89	445.331	1222.75	1291.02	1396.26	1337.34
sp|Q9JK81|MYG1_MOUSE	Myg1	MYG1 exonuclease OS=Mus musculus OX=10090 GN=Myg1 PE=1 SV=1	1181	7	C	UR	586.226	719.341	1196.64	524.464	888.208	475.79	1957.97	605.549	496.536	491.337	583.754
sp|O88738|BIRC6_MOUSE	Birc6	Baculoviral IAP repeat-containing protein 6 OS=Mus musculus OX=10090 GN=Birc6 PE=1 SV=2	1182	14	C	UR	1196.37	1022.85	1462.12	1443.84	980.522	1609.81	1367.44	1543.03	1721.5	1570.57	1254.88
sp|Q99LX0|PARK7_MOUSE	Park7	Parkinson disease protein 7 homolog OS=Mus musculus OX=10090 GN=Park7 PE=1 SV=1	1183	8	C	UR	2168.29	3332.41	567.988	2018.04	3821.85	1964.73	1267.46	3422.38	2400.69	2884.35	2939.69
tr|J3QML2|J3QML2_MOUSE	Abcc3	Canalicular multispecific organic anion transporter 2 OS=Mus musculus OX=10090 GN=Abcc3 PE=1 SV=1	1184	8	C	UR	2260.09	1858.98	2801.69	3341.07	1317.83	2122.57	1787.42	2159.91	2157.08	2005.02	2039.6
sp|Q02053|UBA1_MOUSE	Uba1	Ubiquitin-like modifier-activating enzyme 1 OS=Mus musculus OX=10090 GN=Uba1 PE=1 SV=1	1185	22	C	UR	4259.08	4687.24	1070.27	4123.67	6372.56	3772.55	1032.35	5681.49	4502.93	4504.75	4446.02
sp|Q924T3|XRCC4_MOUSE	Xrcc4	DNA repair protein XRCC4 OS=Mus musculus OX=10090 GN=Xrcc4 PE=1 SV=1	1186	1	C	UR	153.025	174.682	5.99494	140.044	109.589	104.843	9.39104	106.225	106.432	110.78	96.763
sp|P0DMN7|DCAM1_MOUSE	Amd1	S-adenosylmethionine decarboxylase proenzyme 1 OS=Mus musculus OX=10090 GN=Amd1 PE=1 SV=1	1187	1	C	UR	144.905	217.533	707.239	221.492	191.197	121.484	686.085	221.45	231.188	168.779	235.523
sp|Q3U1J4|DDB1_MOUSE	Ddb1	DNA damage-binding protein 1 OS=Mus musculus OX=10090 GN=Ddb1 PE=1 SV=2	1188	21	C	UR	1951.29	2265.67	1947.98	2171.32	3098.78	1636.11	3080.13	2220.99	1784.33	1532.82	2119.71
sp|Q9ER72|SYCC_MOUSE	Cars1	Cysteine--tRNA ligase, cytoplasmic OS=Mus musculus OX=10090 GN=Cars1 PE=1 SV=2	1189	14	C	UR	1605.34	1760.93	369.913	1351.33	2474.36	2240.58	281.543	2709.05	2298.77	2507.89	2628.9
sp|Q3ULD5|MCCB_MOUSE	Mccc2	Methylcrotonoyl-CoA carboxylase beta chain, mitochondrial OS=Mus musculus OX=10090 GN=Mccc2 PE=1 SV=1	1190	10	C	UR	1467.58	1332.57	370.001	1323.34	2047.45	1140.29	141.727	1003.84	863.956	1004.24	1068.91
sp|O35286|DHX15_MOUSE	Dhx15	Pre-mRNA-splicing factor ATP-dependent RNA helicase DHX15 OS=Mus musculus OX=10090 GN=Dhx15 PE=1 SV=2	1191	17	C	UR	2687.18	2369.77	1172.15	3040.47	2121.47	3211.05	1441.35	2871.23	3291.56	2763.72	2522.71
tr|G3X8X0|G3X8X0_MOUSE	Dhx16	DEAH (Asp-Glu-Ala-His) box polypeptide 16 OS=Mus musculus OX=10090 GN=Dhx16 PE=1 SV=1	1191	4	C	UR	224.434	197.205	88.4541	207.924	163.855	213.693	99.0702	181.8	278.519	207.052	197.297
sp|A2A4P0|DHX8_MOUSE	Dhx8	ATP-dependent RNA helicase DHX8 OS=Mus musculus OX=10090 GN=Dhx8 PE=2 SV=1	1191	3	C	UR	465.036	448.378	142.979	482.241	438.112	489.8	156.359	472.513	534.942	467.356	473.692
sp|Q9NYQ2|HAOX2_MOUSE	Hao2	Hydroxyacid oxidase 2 OS=Mus musculus OX=10090 GN=Hao2 PE=1 SV=1	1192	14	C	UR	2095.99	2153.14	1549.71	1509.83	2162.86	798.696	2452.81	1197.44	792.14	776.701	1117.89
sp|Q9DCS3|MECR_MOUSE	Mecr	Enoyl-[acyl-carrier-protein] reductase, mitochondrial OS=Mus musculus OX=10090 GN=Mecr PE=1 SV=2	1193	9	C	UR	1626.21	2009.29	623.42	1618.29	2143.24	1366.3	702.573	1463.41	1136.28	1084.62	1834.19
sp|P63094-3|GNAS2_MOUSE	Gnas	Isoform Gnas-3 of Guanine nucleotide-binding protein G(s) subunit alpha isoforms short OS=Mus musculus OX=10090 GN=Gnas	1194	6	C	UR	604.989	461.783	803.392	770.772	558.818	802.436	487.554	689.681	736.202	740.524	653.233
sp|Q8K310|MATR3_MOUSE	Matr3	Matrin-3 OS=Mus musculus OX=10090 GN=Matr3 PE=1 SV=1	1195	3	C	UR	707.734	627.675	443.298	905.346	656.639	923.327	440.729	914.227	1213.21	1154.32	903.71
tr|A0A494BAL7|A0A494BAL7_MOUSE	Snhg4	Small nucleolar RNA host gene 4 (Fragment) OS=Mus musculus OX=10090 GN=Snhg4 PE=4 SV=1	1195	1	C	UR	90.8127	39.6125	1286.79	59.7903	0	21.1058	319.569	12.2295	27.6467	22.8363	17.9306
sp|Q61140-2|BCAR1_MOUSE	Bcar1	Isoform Cas-A of Breast cancer anti-estrogen resistance protein 1 OS=Mus musculus OX=10090 GN=Bcar1	1196	3	C	UR	161.363	164.307	124.823	213.499	165.833	122.495	102.719	199.019	199.459	186.242	184.809
sp|Q5XG71|UTP20_MOUSE	Utp20	Small subunit processome component 20 homolog OS=Mus musculus OX=10090 GN=Utp20 PE=1 SV=2	1197	7	C	UR	554.957	546.372	1003.16	853.881	467.758	751.16	862.325	668.474	989.869	624.882	587.022
sp|Q8CIN4|PAK2_MOUSE	Pak2	Serine/threonine-protein kinase PAK 2 OS=Mus musculus OX=10090 GN=Pak2 PE=1 SV=1	1198	7	C	UR	1465.95	1158.75	515.64	1447.2	1766.56	1708.32	352.064	2029.49	1778.48	2148.55	1849.44
sp|Q61036|PAK3_MOUSE	Pak3	Serine/threonine-protein kinase PAK 3 OS=Mus musculus OX=10090 GN=Pak3 PE=1 SV=2	1198	3	C	UR	238.329	198.721	135.531	249.483	355.804	218.996	75.4629	339.04	335.114	335.497	381.819
tr|G3X8T9|G3X8T9_MOUSE	Serpina3n	Serine protease inhibitor A3N OS=Mus musculus OX=10090 GN=Serpina3n PE=1 SV=1	1199	6	C	UR	1676.92	1407.04	2588.09	563.473	645.716	1906.74	4190.2	759.13	1387.78	1506.57	700.146
tr|A0A0R4J0I1|A0A0R4J0I1_MOUSE	Serpina3k	Serine protease inhibitor A3K OS=Mus musculus OX=10090 GN=Serpina3k PE=1 SV=1	1199	5	C	UR	1948.8	1497.76	4620.9	864.197	862.229	726.794	2356.21	846.705	1058.82	1124.51	1052.54
sp|Q03734|SPA3M_MOUSE	Serpina3m	Serine protease inhibitor A3M OS=Mus musculus OX=10090 GN=Serpina3m PE=1 SV=2	1199	12	C	UR	1717.56	1699.27	5692.54	788.247	1115.46	1016.93	4138.67	1008.22	1258.06	1758.19	1340.54
sp|Q8C0C7|SYFA_MOUSE	Farsa	Phenylalanine--tRNA ligase alpha subunit OS=Mus musculus OX=10090 GN=Farsa PE=1 SV=1	1200	5	C	UR	843.607	670.271	494.667	938.842	1016.97	1480.37	291.131	1420.53	1237.64	1472.83	906.881
sp|Q8C7K6|PCYXL_MOUSE	Pcyox1l	Prenylcysteine oxidase-like OS=Mus musculus OX=10090 GN=Pcyox1l PE=1 SV=1	1201	6	C	UR	412.968	531.536	1953.51	645.574	525.632	635.81	4391.46	547.962	512.554	450.875	621.677
sp|Q61703|ITIH2_MOUSE	Itih2	Inter-alpha-trypsin inhibitor heavy chain H2 OS=Mus musculus OX=10090 GN=Itih2 PE=1 SV=1	1202	6	C	UR	965.447	1059.37	622.471	1076.26	1329.21	780.911	430.301	1027.1	1765.5	1498.95	1641.89
sp|Q8BVA5|LDAH_MOUSE	Ldah	Lipid droplet-associated hydrolase OS=Mus musculus OX=10090 GN=Ldah PE=1 SV=1	1203	3	C	UR	591.222	505.982	224.513	630.266	332.669	739.13	192.671	522.701	634.721	561.254	498.113
sp|Q80VC9-14|CAMP3_MOUSE	Camsap3	Isoform 14 of Calmodulin-regulated spectrin-associated protein 3 OS=Mus musculus OX=10090 GN=Camsap3	1204	2	C	UR	112.002	89.1991	42.4349	109.924	76.7641	126.621	66.3099	101.777	119.149	96.0733	116.51
sp|Q8VCM8|NCLN_MOUSE	Ncln	Nicalin OS=Mus musculus OX=10090 GN=Ncln PE=1 SV=2	1205	9	C	UR	1150.63	833.805	1482.55	1095.07	251.701	1032.72	1368.07	392.98	859.926	681.953	504.032
tr|Q3U687|Q3U687_MOUSE	Ifit1bl2	Interferon-induced protein with tetratricopeptide repeats 1B-like 2 OS=Mus musculus OX=10090 GN=Ifit1bl2 PE=1 SV=1	1206	3	C	UR	178.358	100.366	121.951	171.009	92.1432	158.123	82.7849	122.145	108.642	119.842	132.802
tr|E9PXF7|E9PXF7_MOUSE	Ifit1bl1	Interferon-induced protein with tetratricpeptide repeats 1B-like 1 OS=Mus musculus OX=10090 GN=Ifit1bl1 PE=1 SV=1	1206	6	C	UR	1731.17	839.595	735.807	1106.54	821.597	1657	767.404	1383.14	973.466	1082.96	1477.74
sp|Q64282|IFIT1_MOUSE	Ifit1	Interferon-induced protein with tetratricopeptide repeats 1 OS=Mus musculus OX=10090 GN=Ifit1 PE=1 SV=2	1206	5	C	UR	697.26	222.129	166.284	375.6	291.249	473.666	136.918	403.768	409.731	404.192	482.614
sp|P49817|CAV1_MOUSE	Cav1	Caveolin-1 OS=Mus musculus OX=10090 GN=Cav1 PE=1 SV=1	1207	2	C	UR	260.2	260.423	2247.29	323.142	53.1999	1204.59	1950.17	146.606	471.237	391.745	146.383
sp|B7ZNG0|KIF7_MOUSE	Kif7	Kinesin-like protein KIF7 OS=Mus musculus OX=10090 GN=Kif7 PE=1 SV=1	1208	1	C	UR	91.335	21.4032	43.6404	43.0858	35.8737	36.1363	61.5757	54.7726	19.2059	57.1648	33.1207
sp|Q8R086|SUOX_MOUSE	Suox	Sulfite oxidase, mitochondrial OS=Mus musculus OX=10090 GN=Suox PE=1 SV=2	1210	6	C	UR	1340.29	1361.02	2044.99	1081.58	1404.31	921.717	1883.42	996.443	796.635	915.814	1233.45
sp|O88543|CSN3_MOUSE	Cops3	COP9 signalosome complex subunit 3 OS=Mus musculus OX=10090 GN=Cops3 PE=1 SV=3	1211	5	C	UR	502.041	439.178	125.838	463.181	689.968	539.174	86.5772	510.841	495.732	419.145	582.942
sp|P18872-2|GNAO_MOUSE	Gnao1	Isoform Alpha-2 of Guanine nucleotide-binding protein G(o) subunit alpha OS=Mus musculus OX=10090 GN=Gnao1	1212	4	C	UR	238.774	181.854	656.083	285.468	164.219	859.861	283.021	228.714	352.272	429.959	171.864
sp|Q7TMK9|HNRPQ_MOUSE	Syncrip	Heterogeneous nuclear ribonucleoprotein Q OS=Mus musculus OX=10090 GN=Syncrip PE=1 SV=2	1214	13	C	UR	1824.83	3185.86	569.437	2049.8	2578.03	1693.64	540.151	3642.63	3560.33	2993.78	3399.73
tr|Q8VHM5|Q8VHM5_MOUSE	Hnrnpr	Heterogeneous nuclear ribonucleoprotein R OS=Mus musculus OX=10090 GN=Hnrnpr PE=1 SV=1	1214	6	C	UR	205.91	230.812	47.0776	176.816	280.098	200.282	72.1704	357.669	283.086	294.676	305.346
sp|Q9ESP1|SDF2L_MOUSE	Sdf2l1	Stromal cell-derived factor 2-like protein 1 OS=Mus musculus OX=10090 GN=Sdf2l1 PE=1 SV=2	1215	5	C	UR	1310.29	1059.5	1260.45	1301.31	1591.29	1077.85	1092.26	1363.07	998.973	1171.19	1379.92
sp|Q9DCT5|SDF2_MOUSE	Sdf2	Stromal cell-derived factor 2 OS=Mus musculus OX=10090 GN=Sdf2 PE=1 SV=1	1216	6	C	UR	798.448	714.986	501.48	735.154	1022.12	506.895	420.636	609.506	482.168	555.182	859.983
sp|Q63886|UD11_MOUSE	Ugt1a1	UDP-glucuronosyltransferase 1A1 OS=Mus musculus OX=10090 GN=Ugt1a1 PE=1 SV=2	1217	8	C	UR	1827.67	988.278	3744.72	1686.54	313.094	1653.92	2071.8	609.032	796.019	813.342	691.607
sp|Q64435|UD16_MOUSE	Ugt1a6	UDP-glucuronosyltransferase 1-6 OS=Mus musculus OX=10090 GN=Ugt1a6 PE=1 SV=1	1217	4	C	UR	152.336	102.206	158.402	191.895	42.0396	130.316	75.7138	76.9575	89.6034	89.6659	71.9765
sp|Q6ZQM8|UD17C_MOUSE	Ugt1a7c	UDP-glucuronosyltransferase 1-7C OS=Mus musculus OX=10090 GN=Ugt1a7c PE=1 SV=1	1217	7	C	UR	543.75	455.171	786.273	663.511	142.052	492.175	572.28	215.506	288.555	277.61	264.111
sp|P17717|UDB17_MOUSE	Ugt2b17	UDP-glucuronosyltransferase 2B17 OS=Mus musculus OX=10090 GN=Ugt2b17 PE=1 SV=1	1217	2	C	UR	146.621	83.1957	341.287	153.954	49.0401	144.276	95.7309	80.2544	63.4552	78.7611	81.7734
sp|Q8BKT7|THOC5_MOUSE	Thoc5	THO complex subunit 5 homolog OS=Mus musculus OX=10090 GN=Thoc5 PE=1 SV=2	1218	3	C	UR	94.8273	77.719	23.5387	96.8672	99.7432	73.0351	23.7371	81.4305	89.6083	71.8197	82.1441
sp|Q64442|DHSO_MOUSE	Sord	Sorbitol dehydrogenase OS=Mus musculus OX=10090 GN=Sord PE=1 SV=3	1219	11	C	UR	1990.19	3422.79	1768.42	1624.02	2986.04	1648.44	3563.11	2007.54	1167.47	1554.13	1702.53
sp|O55029|COPB2_MOUSE	Copb2	Coatomer subunit beta' OS=Mus musculus OX=10090 GN=Copb2 PE=1 SV=2	1220	24	C	UR	2901.66	2743.88	1353.01	3025.44	3015.58	2689.65	2214.3	2777.68	2872.4	2520.24	3225.68
sp|Q8CI59-2|STEA3_MOUSE	Steap3	Isoform 2 of Metalloreductase STEAP3 OS=Mus musculus OX=10090 GN=Steap3	1221	5	C	UR	336.329	327.972	480.972	559.024	234.797	664.036	356.276	396.387	477.383	484.338	255.607
sp|P49442|INPP_MOUSE	Inpp1	Inositol polyphosphate 1-phosphatase OS=Mus musculus OX=10090 GN=Inpp1 PE=1 SV=2	1222	5	C	UR	1124.82	1199.35	691.995	887.641	1241.56	859.64	460.267	969.062	873.894	812.304	992.679
sp|Q8CGP2-2|H2B1P_MOUSE	Hist1h2bp	Isoform 2 of Histone H2B type 1-P OS=Mus musculus OX=10090 GN=Hist1h2bp	1223	22	C	UR	6395.14	7976.26	1049.76	7433.7	8872.4	7167.87	875.847	9369.23	7331.41	7375.73	7444.16
sp|P10854|H2B1M_MOUSE	H2bc14	Histone H2B type 1-M OS=Mus musculus OX=10090 GN=H2bc14 PE=1 SV=2	1223	1	C	UR	200.991	244.262	20.287	194.76	261.629	180.879	19.9687	224.949	231.686	229.977	252.767
sp|A2BE28|LAS1L_MOUSE	Las1l	Ribosomal biogenesis protein LAS1L OS=Mus musculus OX=10090 GN=Las1l PE=1 SV=1	1224	2	C	UR	144.51	116.167	222.343	220.795	93.625	201.331	160.546	150.073	205.48	188.993	141.48
sp|Q9DB34|CHM2A_MOUSE	Chmp2a	Charged multivesicular body protein 2a OS=Mus musculus OX=10090 GN=Chmp2a PE=1 SV=1	1225	8	C	UR	1338.51	1023.83	1372.32	1055.96	1214.14	1071.78	1629.19	1190.7	859.809	820.28	1219.38
sp|P28659-4|CELF1_MOUSE	Celf1	Isoform 4 of CUGBP Elav-like family member 1 OS=Mus musculus OX=10090 GN=Celf1	1226	4	C	UR	419.393	511.216	532.153	400.751	368.811	457.558	286.605	442.832	499.083	499.885	470.321
sp|Q9WV84|NDKM_MOUSE	Nme4	Nucleoside diphosphate kinase, mitochondrial OS=Mus musculus OX=10090 GN=Nme4 PE=1 SV=1	1227	1	C	UR	59.7877	41.6325	24.2743	68.5987	81.7002	47.8539	39.8515	61.4898	52.0889	48.2089	59.0585
sp|Q8R3G9|TSN8_MOUSE	Tspan8	Tetraspanin-8 OS=Mus musculus OX=10090 GN=Tspan8 PE=1 SV=1	1228	10	C	UR	915.707	1774.87	3623.67	1219.49	558.959	541.427	5479.07	677.973	403.142	572.124	533.771
sp|Q7TNC4|LC7L2_MOUSE	Luc7l2	Putative RNA-binding protein Luc7-like 2 OS=Mus musculus OX=10090 GN=Luc7l2 PE=1 SV=1	1229	4	C	UR	581.693	733.632	131.768	902.565	789.64	805.997	197.804	1567.98	1062.55	1504.74	894.427
tr|A2A7S7|A2A7S7_MOUSE	Yars	Tyrosine--tRNA ligase OS=Mus musculus OX=10090 GN=Yars PE=1 SV=1	1230	15	C	UR	1379.05	1551.53	1081.79	1094.14	2197.74	1195.88	817.036	1442.75	1363.92	1021.5	1637.64
sp|Q08189|TGM3_MOUSE	Tgm3	Protein-glutamine gamma-glutamyltransferase E OS=Mus musculus OX=10090 GN=Tgm3 PE=1 SV=2	1231	15	C	UR	1087.71	3403.62	2947.7	2136.01	6606.29	627.509	2439.92	1031.22	570.006	509.188	3129.6
sp|Q8CIM8|INT4_MOUSE	Ints4	Integrator complex subunit 4 OS=Mus musculus OX=10090 GN=Ints4 PE=1 SV=1	1232	2	C	UR	457.255	335.845	311.982	505.753	223.883	696.662	279.256	348.117	443.682	400.86	306.576
sp|Q9EPE9|AT131_MOUSE	Atp13a1	Manganese-transporting ATPase 13A1 OS=Mus musculus OX=10090 GN=Atp13a1 PE=1 SV=2	1233	9	C	UR	1943.72	1424.13	612.509	2410.98	529.344	2331.47	585.256	1063.33	2081.76	1582.21	971.625
sp|Q99JW2|ACY1_MOUSE	Acy1	Aminoacylase-1 OS=Mus musculus OX=10090 GN=Acy1 PE=1 SV=1	1235	10	C	UR	1919.97	2590.39	3450.82	1550.08	2711.02	806.829	3661.57	1100.2	1121.53	885.895	1431.56
sp|Q8K1H1|TDRD7_MOUSE	Tdrd7	Tudor domain-containing protein 7 OS=Mus musculus OX=10090 GN=Tdrd7 PE=1 SV=1	1236	1	C	UR	118.27	122.924	47.8625	132.17	89.4593	110.88	45.8515	90.1548	117.541	110.697	101.87
sp|Q8VEA4|MIA40_MOUSE	Chchd4	Mitochondrial intermembrane space import and assembly protein 40 OS=Mus musculus OX=10090 GN=Chchd4 PE=1 SV=1	1237	3	C	UR	57.0806	53.9007	137.734	66.5694	68.4868	29.7009	51.9705	55.8417	57.8615	51.1126	44.1432
sp|Q9QXL2|KI21A_MOUSE	Kif21a	Kinesin-like protein KIF21A OS=Mus musculus OX=10090 GN=Kif21a PE=1 SV=2	1238	5	C	UR	195.483	168.101	123.927	200.472	263.337	260.971	101.308	288.539	254.406	263.079	287.86
sp|Q07076|ANXA7_MOUSE	Anxa7	Annexin A7 OS=Mus musculus OX=10090 GN=Anxa7 PE=1 SV=2	1239	7	C	UR	735.426	954.757	2982.79	821.409	591.923	511.14	2260.09	513.89	544.626	463.976	681.328
sp|P26369|U2AF2_MOUSE	U2af2	Splicing factor U2AF 65 kDa subunit OS=Mus musculus OX=10090 GN=U2af2 PE=1 SV=3	1240	6	C	UR	473.785	537.276	188.831	540.749	442.398	488.994	202.129	545.85	539.57	494.846	501.77
sp|Q9CQ75|NDUA2_MOUSE	Ndufa2	NADH dehydrogenase [ubiquinone] 1 alpha subcomplex subunit 2 OS=Mus musculus OX=10090 GN=Ndufa2 PE=1 SV=3	1241	3	C	UR	603.932	529.492	692.227	664.626	744.515	392.686	273.776	417.988	366.486	317.963	603.729
sp|Q9CQ10|CHMP3_MOUSE	Chmp3	Charged multivesicular body protein 3 OS=Mus musculus OX=10090 GN=Chmp3 PE=1 SV=3	1242	3	C	UR	621.032	551.697	329.528	553.415	575.624	575.122	363.444	626.164	526.874	525.975	612.662
sp|A7L9Z8|AT2C2_MOUSE	Atp2c2	Calcium-transporting ATPase type 2C member 2 OS=Mus musculus OX=10090 GN=Atp2c2 PE=2 SV=1	1243	1	C	UR	16.1213	6.89501	13.7118	18.7167	11.6562	25.9722	22.2401	11.7723	10.2283	7.0974	8.22424
sp|P70227|ITPR3_MOUSE	Itpr3	Inositol 1,4,5-trisphosphate receptor type 3 OS=Mus musculus OX=10090 GN=Itpr3 PE=1 SV=3	1244	22	C	UR	3069.55	2943.75	1446.1	3674.14	1310.23	3504.31	1241.74	2046.8	2886.33	2459.49	2595.98
sp|P11881|ITPR1_MOUSE	Itpr1	Inositol 1,4,5-trisphosphate receptor type 1 OS=Mus musculus OX=10090 GN=Itpr1 PE=1 SV=2	1244	8	C	UR	1106.56	1057.19	1443.06	1452.85	491.014	1797.64	819.771	712.61	1185.4	1038.94	784.323
sp|Q9Z329|ITPR2_MOUSE	Itpr2	Inositol 1,4,5-trisphosphate receptor type 2 OS=Mus musculus OX=10090 GN=Itpr2 PE=1 SV=4	1244	4	C	UR	637.679	483.457	191.396	784.66	187.926	694.692	169.922	333.94	575.976	570.054	341.625
sp|Q61024|ASNS_MOUSE	Asns	Asparagine synthetase [glutamine-hydrolyzing] OS=Mus musculus OX=10090 GN=Asns PE=1 SV=3	1245	4	C	UR	237.519	224.036	78.6905	249.905	222.265	223.526	124.693	211.223	232.563	205.369	220.84
sp|P80318|TCPG_MOUSE	Cct3	T-complex protein 1 subunit gamma OS=Mus musculus OX=10090 GN=Cct3 PE=1 SV=1	1246	17	C	UR	2134.3	2523.39	380.985	2310.4	3357.15	2130.36	286.792	3343.73	3156.9	2908.93	3321.36
sp|Q9CQ62|DECR_MOUSE	Decr1	2,4-dienoyl-CoA reductase, mitochondrial OS=Mus musculus OX=10090 GN=Decr1 PE=1 SV=1	1247	8	C	UR	2231.4	1997.55	1946.54	2022.56	2553.71	1380.98	1128.33	1516.43	1309.12	1238.67	2075.45
sp|Q9WTP6|KAD2_MOUSE	Ak2	Adenylate kinase 2, mitochondrial OS=Mus musculus OX=10090 GN=Ak2 PE=1 SV=5	1248	13	C	UR	1469.13	1121.33	1098.86	1091.43	2367.98	1003.05	583.72	2524.36	1150.4	1682.02	1796.5
sp|Q91VT1|NSE2_MOUSE	Nsmce2	E3 SUMO-protein ligase NSE2 OS=Mus musculus OX=10090 GN=Nsmce2 PE=2 SV=1	1249	1	C	UR	78.0917	81.915	25.6551	108.7	117.471	78.3065	21.9851	110.79	86.212	109.554	91.8918
sp|P50544|ACADV_MOUSE	Acadvl	Very long-chain specific acyl-CoA dehydrogenase, mitochondrial OS=Mus musculus OX=10090 GN=Acadvl PE=1 SV=3	1250	20	C	UR	3291.04	2469.21	3741.68	3489.34	3015.91	2319.78	4200.66	2190.76	1588.91	1645.19	2346.02
sp|Q91WS0|CISD1_MOUSE	Cisd1	CDGSH iron-sulfur domain-containing protein 1 OS=Mus musculus OX=10090 GN=Cisd1 PE=1 SV=1	1251	1	C	UR	97.5246	134.628	154.468	74.7293	54.4288	91.4305	191.827	61.7583	52.5082	54.6981	39.5812
sp|Q9CQJ8|NDUB9_MOUSE	Ndufb9	NADH dehydrogenase [ubiquinone] 1 beta subcomplex subunit 9 OS=Mus musculus OX=10090 GN=Ndufb9 PE=1 SV=3	1252	3	C	UR	292.058	251.206	309.747	267.545	200.909	241.506	82.0837	142.903	127.48	144.507	159.623
sp|P21278|GNA11_MOUSE	Gna11	Guanine nucleotide-binding protein subunit alpha-11 OS=Mus musculus OX=10090 GN=Gna11 PE=1 SV=1	1253	2	C	UR	457.328	351.445	424.435	455.549	370.943	418.121	581.459	407.333	327.775	293.254	410.272
sp|P27601|GNA13_MOUSE	Gna13	Guanine nucleotide-binding protein subunit alpha-13 OS=Mus musculus OX=10090 GN=Gna13 PE=1 SV=1	1253	7	C	UR	897.023	580.202	831.455	798.802	558.526	830.481	677.514	608.95	694.69	606.91	710.544
sp|P21279|GNAQ_MOUSE	Gnaq	Guanine nucleotide-binding protein G(q) subunit alpha OS=Mus musculus OX=10090 GN=Gnaq PE=1 SV=4	1253	7	C	UR	1226.74	957.646	1011.71	1081.42	920.733	1252.18	1208.01	960.282	853.44	802.462	1106.84
sp|P30677|GNA14_MOUSE	Gna14	Guanine nucleotide-binding protein subunit alpha-14 OS=Mus musculus OX=10090 GN=Gna14 PE=1 SV=2	1253	2	C	UR	94.1479	87.9674	120.464	96.8529	79.5365	93.6464	111.804	96.0886	103.236	63.9851	139.644
sp|Q8VDI7|UBAC1_MOUSE	Ubac1	Ubiquitin-associated domain-containing protein 1 OS=Mus musculus OX=10090 GN=Ubac1 PE=1 SV=2	1254	1	C	UR	7.49529	3.8123	8.11957	9.90562	20.2362	10.5745	9.90281	39.0331	17.932	36.7614	24.8902
sp|P35550|FBRL_MOUSE	Fbl	rRNA 2'-O-methyltransferase fibrillarin OS=Mus musculus OX=10090 GN=Fbl PE=1 SV=2	1255	4	C	UR	305.31	271.754	169.172	388.209	373.891	550.084	158.982	499.508	451.957	469.064	402.598
sp|Q8BYB9|PGLT1_MOUSE	Poglut1	Protein O-glucosyltransferase 1 OS=Mus musculus OX=10090 GN=Poglut1 PE=1 SV=2	1256	3	C	UR	384.981	350.376	543.948	397.566	212.552	472.989	266.322	330.243	459.269	395.705	293.566
sp|Q9CXF4|TBC15_MOUSE	Tbc1d15	TBC1 domain family member 15 OS=Mus musculus OX=10090 GN=Tbc1d15 PE=1 SV=1	1257	4	C	UR	504.182	338.894	315.276	371.811	318.551	334.321	204.986	269.256	422.666	371.535	337.156
tr|F7BJK1|F7BJK1_MOUSE	Pcdh1	Protocadherin 1 (Fragment) OS=Mus musculus OX=10090 GN=Pcdh1 PE=1 SV=1	1258	3	C	UR	234.876	509.256	104.121	526.494	226.77	189.658	79.3217	199.114	161.814	325.717	276.795
sp|Q61176|ARGI1_MOUSE	Arg1	Arginase-1 OS=Mus musculus OX=10090 GN=Arg1 PE=1 SV=1	1259	1	C	UR	10.0269	15.1186	14.2518	12.2367	16.1289	7.005	41.2216	17.4852	11.2415	22.199	19.3264
sp|P05089|ARGI1_HUMAN_contaminant	ARG1	Arginase-1 OS=Homo sapiens GN=ARG1 PE=1 SV=2	1259	3	C	UR	496.12	985.27	1313.31	759.447	818.818	440.609	1905.51	1232.96	666.669	1517.77	954.964
sp|Q9Z0U1|ZO2_MOUSE	Tjp2	Tight junction protein ZO-2 OS=Mus musculus OX=10090 GN=Tjp2 PE=1 SV=2	1260	8	C	UR	905.392	876.275	360.143	755.483	1024.89	655.254	299.876	1193.09	836.114	1023.36	1493.28
sp|P09242|PPBT_MOUSE	Alpl	Alkaline phosphatase, tissue-nonspecific isozyme OS=Mus musculus OX=10090 GN=Alpl PE=1 SV=2	1261	3	C	UR	76.7937	161.532	489.342	120.789	79.9724	157.837	487.976	84.7814	121.036	187.213	56.556
sp|Q8R349|CDC16_MOUSE	Cdc16	Cell division cycle protein 16 homolog OS=Mus musculus OX=10090 GN=Cdc16 PE=1 SV=1	1262	4	C	UR	585.294	606.733	189.42	739.172	435.11	813.586	110.131	599.228	765.728	610.073	497.804
sp|Q9D939|ST1C2_MOUSE	Sult1c2	Sulfotransferase 1C2 OS=Mus musculus OX=10090 GN=Sult1c2 PE=1 SV=1	1263	3	C	UR	329.206	278.064	234.818	430.806	454.654	240.642	189.535	351.937	352.093	337.167	308.021
sp|Q3UV70|PDP1_MOUSE	Pdp1	[Pyruvate dehydrogenase [acetyl-transferring]]-phosphatase 1, mitochondrial OS=Mus musculus OX=10090 GN=Pdp1 PE=1 SV=1	1264	4	C	UR	100.784	103.784	58.7756	107.86	138.203	110.763	43.1755	129.979	113.871	130.409	133.29
sp|P62996|TRA2B_MOUSE	Tra2b	Transformer-2 protein homolog beta OS=Mus musculus OX=10090 GN=Tra2b PE=1 SV=1	1265	1	C	UR	142.949	181.048	61.5846	139.069	244.649	125.42	29.3113	261.263	248.958	230.86	282.473
sp|Q7TQK4|EXOS3_MOUSE	Exosc3	Exosome complex component RRP40 OS=Mus musculus OX=10090 GN=Exosc3 PE=1 SV=3	1266	5	C	UR	682.941	592.739	313.724	784.687	728.136	836.709	299.667	773.285	890.786	714.12	780.706
sp|B2RY56|RBM25_MOUSE	Rbm25	RNA-binding protein 25 OS=Mus musculus OX=10090 GN=Rbm25 PE=1 SV=2	1267	4	C	UR	1533.43	923.203	554.126	1436.02	797.377	1741.07	622.409	1641.6	1477.55	1678.73	1303.41
sp|Q9ERI2|RB27A_MOUSE	Rab27a	Ras-related protein Rab-27A OS=Mus musculus OX=10090 GN=Rab27a PE=1 SV=1	1268	2	C	UR	273.629	259.222	652.136	274.432	312.86	338.095	482.67	254.585	332.991	269.357	306.927
sp|Q99P58|RB27B_MOUSE	Rab27b	Ras-related protein Rab-27B OS=Mus musculus OX=10090 GN=Rab27b PE=1 SV=3	1268	3	C	UR	89.1219	70.5378	154.207	84.335	99.6362	122.668	86.8164	103.276	98.8894	94.1781	112.913
sp|P01845|LAC3_MOUSE	Iglc3	Ig lambda-3 chain C region OS=Mus musculus OX=10090 GN=Iglc3 PE=1 SV=1	1269	6	C	UR	217.123	275.132	1439.15	437.718	1288.72	1570.39	2892.89	712.162	287.357	1383.08	678.315
sp|P61255|RL26_MOUSE	Rpl26	60S ribosomal protein L26 OS=Mus musculus OX=10090 GN=Rpl26 PE=1 SV=1	1270	8	C	UR	1245.33	1668.49	606.547	2148.93	1336.09	1161.34	1204.41	1797.01	1599.21	1174.81	1487.82
tr|Q5NC41|Q5NC41_MOUSE	1810065E05Rik	RIKEN cDNA 1810065E05 gene OS=Mus musculus OX=10090 GN=1810065E05Rik PE=1 SV=1	1271	8	C	UR	1025.78	844.758	1366.76	630.189	625.631	269.235	1653.63	419.065	237.449	438.46	391.672
sp|Q62189|SNRPA_MOUSE	Snrpa	U1 small nuclear ribonucleoprotein A OS=Mus musculus OX=10090 GN=Snrpa PE=1 SV=3	1273	4	C	UR	555.901	516.513	645.258	518.797	615.803	624.549	666.649	712.701	604.877	530.191	629.859
sp|Q9CQI7|RU2B_MOUSE	Snrpb2	U2 small nuclear ribonucleoprotein B'' OS=Mus musculus OX=10090 GN=Snrpb2 PE=1 SV=1	1273	2	C	UR	1190.18	1397.16	401.046	979.183	1300.6	948.068	975.061	1492.23	927.865	1040.69	927.023
sp|Q8QZR5|ALAT1_MOUSE	Gpt	Alanine aminotransferase 1 OS=Mus musculus OX=10090 GN=Gpt PE=1 SV=3	1274	9	C	UR	1598.33	1780.55	769.087	1020.88	1458.53	878.617	456.996	973.42	946.908	1014.25	858.487
sp|Q99KR3|LACB2_MOUSE	Lactb2	Endoribonuclease LACTB2 OS=Mus musculus OX=10090 GN=Lactb2 PE=1 SV=1	1275	11	C	UR	1249.34	1646.91	430.944	1001.54	1741.47	918.765	551.471	1261.79	1018.36	1120.01	1073.68
sp|Q8BW41|PMGT2_MOUSE	Pomgnt2	Protein O-linked-mannose beta-1,4-N-acetylglucosaminyltransferase 2 OS=Mus musculus OX=10090 GN=Pomgnt2 PE=1 SV=1	1276	2	C	UR	173.454	153.505	677.192	208.166	112.623	160.232	406.778	108.334	129.48	107.073	131.338
sp|Q9Z2L6|MINP1_MOUSE	Minpp1	Multiple inositol polyphosphate phosphatase 1 OS=Mus musculus OX=10090 GN=Minpp1 PE=1 SV=3	1277	8	C	UR	759.908	1066.74	757.179	1026.84	1345.49	689.817	349.235	977.115	718.172	773.759	1171.66
sp|Q9DBR3|ARMC8_MOUSE	Armc8	Armadillo repeat-containing protein 8 OS=Mus musculus OX=10090 GN=Armc8 PE=1 SV=2	1278	5	C	UR	289.047	241.202	145.269	285.289	277.673	245.509	92.4314	230.293	296.58	214.6	258.634
sp|P29699|FETUA_MOUSE	Ahsg	Alpha-2-HS-glycoprotein OS=Mus musculus OX=10090 GN=Ahsg PE=1 SV=1	1279	6	C	UR	369.068	423.852	115.675	425.557	464.983	493.138	77.5274	369.391	898.251	1005.79	700.021
tr|A0A0R4J065|A0A0R4J065_MOUSE	Atg4b	Cysteine protease OS=Mus musculus OX=10090 GN=Atg4b PE=1 SV=1	1280	1	C	UR	12.6775	15.1297	1.94726	10.3217	30.5574	22.0145	3.18318	22.285	22.5678	15.7641	18.1239
tr|Q923L7|Q923L7_MOUSE	Ear6	Ear6 protein OS=Mus musculus OX=10090 GN=Ear6 PE=1 SV=1	1281	2	C	UR	54.3001	81.7344	549.877	67.9153	83.1536	56.1243	677.812	55.4861	57.0905	99.7341	51.7114
sp|Q78PY7|SND1_MOUSE	Snd1	Staphylococcal nuclease domain-containing protein 1 OS=Mus musculus OX=10090 GN=Snd1 PE=1 SV=1	1282	13	C	UR	1692.78	1608.06	452.903	1519.2	2227.78	2020.64	306.569	2819.47	2506.99	2344.39	2725.55
sp|Q8R0I0|ACE2_MOUSE	Ace2	Angiotensin-converting enzyme 2 OS=Mus musculus OX=10090 GN=Ace2 PE=1 SV=1	1283	5	C	UR	528.247	1368.43	798.861	647.793	370.587	641.859	1856.68	607.669	775.391	415.267	857.204
sp|Q6A051|ATRN1_MOUSE	Atrnl1	Attractin-like protein 1 OS=Mus musculus OX=10090 GN=Atrnl1 PE=1 SV=2	1284	2	C	UR	86.2769	71.1447	53.7685	59.1978	56.9692	61.6638	94.1254	48.5126	61.8259	52.4435	64.971
sp|Q9D7N9|APMAP_MOUSE	Apmap	Adipocyte plasma membrane-associated protein OS=Mus musculus OX=10090 GN=Apmap PE=1 SV=1	1285	6	C	UR	576.086	472.971	2511.83	587.669	189.74	622.586	2281.01	348.955	457.601	431.809	390.21
sp|Q9CQ88|TSN31_MOUSE	Tspan31	Tetraspanin-31 OS=Mus musculus OX=10090 GN=Tspan31 PE=1 SV=1	1286	4	C	UR	279.609	224.833	267.609	264.592	264.577	410.254	121.647	198.271	183.661	166.208	192.258
sp|Q9D8C2|TSN13_MOUSE	Tspan13	Tetraspanin-13 OS=Mus musculus OX=10090 GN=Tspan13 PE=1 SV=1	1286	4	C	UR	533.135	475.666	279.226	624.824	437.082	786.177	426.051	375.124	358.034	352.921	289.622
sp|Q8VC42|RMC1_MOUSE	Rmc1	Regulator of MON1-CCZ1 complex OS=Mus musculus OX=10090 GN=Rmc1 PE=2 SV=1	1287	6	C	UR	562.896	668.79	298.182	545.427	623.401	664.985	224.681	789.346	768.287	850.421	797.742
sp|Q9CQV5|RT24_MOUSE	Mrps24	28S ribosomal protein S24, mitochondrial OS=Mus musculus OX=10090 GN=Mrps24 PE=1 SV=1	1288	2	C	UR	865.599	773.382	627.429	843.524	650.745	579.42	364.557	649.233	579.667	453.607	648.294
sp|Q8BX94|OSBL2_MOUSE	Osbpl2	Oxysterol-binding protein-related protein 2 OS=Mus musculus OX=10090 GN=Osbpl2 PE=1 SV=1	1289	3	C	UR	615.276	791.039	970.332	828.972	513.307	675.442	729.131	571.74	593.989	539.123	616.007
sp|P01029|CO4B_MOUSE	C4b	Complement C4-B OS=Mus musculus OX=10090 GN=C4b PE=1 SV=3	1290	21	C	UR	2358.96	2343.69	7002.96	2571.43	2161.89	2232.88	5949.91	2073.99	3615.75	3615.66	2814.3
sp|Q9QXL8|NDK7_MOUSE	Nme7	Nucleoside diphosphate kinase 7 OS=Mus musculus OX=10090 GN=Nme7 PE=1 SV=1	1291	2	C	UR	79.0506	79.757	12.2065	52.4637	81.567	78.2669	18.3703	74.7913	87.2422	72.5344	75.7516
sp|Q9R099|TBL2_MOUSE	Tbl2	Transducin beta-like protein 2 OS=Mus musculus OX=10090 GN=Tbl2 PE=1 SV=2	1292	7	C	UR	1843.29	1226.37	461.679	1538.88	1252.85	2167.91	780.051	1339.87	1838.47	1556.14	1358.53
sp|P70389|ALS_MOUSE	Igfals	Insulin-like growth factor-binding protein complex acid labile subunit OS=Mus musculus OX=10090 GN=Igfals PE=1 SV=1	1293	2	C	UR	145.321	181.6	215.31	202.764	178.338	110.008	243.397	113.504	163.834	178.782	233.601
sp|P62849|RS24_MOUSE	Rps24	40S ribosomal protein S24 OS=Mus musculus OX=10090 GN=Rps24 PE=1 SV=1	1294	4	C	UR	293.108	506.308	395.224	479.448	397.972	269.564	367.049	503.02	637.236	487.891	474.339
tr|F8VQ29|F8VQ29_MOUSE	Iqgap3	IQ motif-containing GTPase-activating protein 3 OS=Mus musculus OX=10090 GN=Iqgap3 PE=1 SV=1	1295	1	C	UR	60.998	62.026	375.177	143.766	71.5502	51.811	298.213	77.768	137.004	81.7458	90.7242
tr|Q8K154|Q8K154_MOUSE	Ugt2b34	UDP-glucuronosyltransferase OS=Mus musculus OX=10090 GN=Ugt2b34 PE=1 SV=1	1296	8	C	UR	1495.91	997.235	3608.31	1338.31	438.731	1302.25	2736.88	524.154	680.662	621.999	643.495
sp|Q91ZW3|SMCA5_MOUSE	Smarca5	SWI/SNF-related matrix-associated actin-dependent regulator of chromatin subfamily A member 5 OS=Mus musculus OX=10090 GN=Smarca5 PE=1 SV=1	1297	17	C	UR	1628.31	1514.87	831.68	2065.02	1708.25	2005.41	759.764	2134.7	2509.12	2161.52	1866.63
sp|Q9D1L0|CHCH2_MOUSE	Chchd2	Coiled-coil-helix-coiled-coil-helix domain-containing protein 2 OS=Mus musculus OX=10090 GN=Chchd2 PE=2 SV=1	1298	3	C	UR	102.776	89.439	27.0678	69.8553	90.9856	57.1619	26.3492	69.5063	53.5861	75.3907	116.94
sp|O54983|CRYM_MOUSE	Crym	Ketimine reductase mu-crystallin OS=Mus musculus OX=10090 GN=Crym PE=1 SV=1	1299	4	C	UR	234.92	322.618	132.497	218.681	448.945	237.95	185.529	221.432	222.273	254.837	241.988
sp|Q6WKZ7|NOSTN_MOUSE	Nostrin	Nostrin OS=Mus musculus OX=10090 GN=Nostrin PE=1 SV=2	1300	4	C	UR	429.497	345.928	411.384	437.199	238.744	404.737	285.117	291.435	370.474	240.986	452.289
sp|P25206|MCM3_MOUSE	Mcm3	DNA replication licensing factor MCM3 OS=Mus musculus OX=10090 GN=Mcm3 PE=1 SV=2	1301	8	C	UR	481.524	623.228	320.046	618.332	359.08	496.901	314.689	459.136	702.988	460.077	418.501
sp|Q8CCB4|VPS53_MOUSE	Vps53	Vacuolar protein sorting-associated protein 53 homolog OS=Mus musculus OX=10090 GN=Vps53 PE=1 SV=1	1302	8	C	UR	1233.36	895.888	1241.44	1309.22	964.313	1451.58	921.292	1134.98	1333.34	1195.54	1159.07
sp|Q91W89|MA2C1_MOUSE	Man2c1	Alpha-mannosidase 2C1 OS=Mus musculus OX=10090 GN=Man2c1 PE=1 SV=1	1304	12	C	UR	968.357	1226.8	1648.9	1038.07	1013.7	1049.52	3062.93	868.144	833.707	869.625	786.813
sp|Q91VR5|DDX1_MOUSE	Ddx1	ATP-dependent RNA helicase DDX1 OS=Mus musculus OX=10090 GN=Ddx1 PE=1 SV=1	1305	15	C	UR	1462.52	1248.36	1206.29	1242.56	1044.06	1382.07	1861.08	1160.91	1153.94	1309.9	1040.23
sp|O88968|TCO2_MOUSE	Tcn2	Transcobalamin-2 OS=Mus musculus OX=10090 GN=Tcn2 PE=1 SV=1	1306	1	C	UR	12.8194	14.6989	34.0295	10.0989	8.33609	10.4714	37.6499	12.596	11.1379	7.40664	11.5768
sp|Q9EQ80|NIF3L_MOUSE	Nif3l1	NIF3-like protein 1 OS=Mus musculus OX=10090 GN=Nif3l1 PE=1 SV=4	1307	4	C	UR	311.299	458.702	418.136	318.357	479.144	293.305	1051.73	392.545	364.928	321.243	433.477
sp|Q9WU63|HEBP2_MOUSE	Hebp2	Heme-binding protein 2 OS=Mus musculus OX=10090 GN=Hebp2 PE=1 SV=1	1308	1	C	UR	82.7697	109.843	19.6523	65.3265	136.147	52.8925	49.9057	70.6366	45.2118	55.675	52.7779
sp|Q91ZE0|TMLH_MOUSE	Tmlhe	Trimethyllysine dioxygenase, mitochondrial OS=Mus musculus OX=10090 GN=Tmlhe PE=1 SV=2	1309	5	C	UR	474.719	552.382	610.863	439.597	450.61	385.084	606.487	394.978	225.085	320.142	398.267
sp|Q8R2Y2|MUC18_MOUSE	Mcam	Cell surface glycoprotein MUC18 OS=Mus musculus OX=10090 GN=Mcam PE=1 SV=1	1310	5	C	UR	171.804	202.307	635.599	206.292	136.766	998.57	658.335	183.781	455.327	445.055	148.707
sp|O35459|ECH1_MOUSE	Ech1	Delta(3,5)-Delta(2,4)-dienoyl-CoA isomerase, mitochondrial OS=Mus musculus OX=10090 GN=Ech1 PE=1 SV=1	1311	10	C	UR	2589.97	1837.81	352.095	2045.92	2175.19	1287.43	380.668	1412.92	1094.07	1099.74	1385
sp|O35448|PPT2_MOUSE	Ppt2	Lysosomal thioesterase PPT2 OS=Mus musculus OX=10090 GN=Ppt2 PE=1 SV=1	1312	1	C	UR	220.883	271.539	26.4993	107.025	297.31	94.3733	44.0003	99.9678	70.8796	102.622	112.181
sp|P97789|XRN1_MOUSE	Xrn1	5'-3' exoribonuclease 1 OS=Mus musculus OX=10090 GN=Xrn1 PE=1 SV=1	1313	4	C	UR	472.441	270.751	274.771	365.476	491.288	498.485	210.849	540.005	536.494	481.019	486.792
sp|Q80SU7|GVIN1_MOUSE	Gvin1	Interferon-induced very large GTPase 1 OS=Mus musculus OX=10090 GN=Gvin1 PE=1 SV=1	1314	17	C	UR	2048.54	1138.37	1316.56	1967.18	1277.6	2290.94	1142.94	2125.67	3348.2	2649.34	1901.63
sp|Q9R100|CAD17_MOUSE	Cdh17	Cadherin-17 OS=Mus musculus OX=10090 GN=Cdh17 PE=1 SV=1	1315	14	C	UR	3510.31	4795.86	3041.6	3914.87	4600.29	1059.47	898.994	3579.82	1903.27	2618.38	3367.96
sp|Q0KL02-4|TRIO_MOUSE	Trio	Isoform 4 of Triple functional domain protein OS=Mus musculus OX=10090 GN=Trio	1316	6	C	UR	499.154	343.342	282.634	398.089	387.745	407.618	357.952	338.793	392.477	322.311	423.324
sp|A2CG49-7|KALRN_MOUSE	Kalrn	Isoform 7 of Kalirin OS=Mus musculus OX=10090 GN=Kalrn	1316	2	C	UR	202.74	159.51	317.316	200.063	141.773	140.321	299.76	141.498	132.769	110.806	213.844
sp|Q3TLH4|PRC2C_MOUSE	Prrc2c	Protein PRRC2C OS=Mus musculus OX=10090 GN=Prrc2c PE=1 SV=3	1317	1	C	UR	56.9791	22.413	14.3838	97.243	57.9547	54.2217	8.4453	107.381	203.615	138.038	126.045
sp|P70274|SEPP1_MOUSE	Selenop	Selenoprotein P OS=Mus musculus OX=10090 GN=Selenop PE=1 SV=3	1318	5	C	UR	384.978	349.294	300.314	311.603	317.937	293.129	363.44	266.93	331.842	397.838	339.513
sp|Q8K209|AGRG1_MOUSE	Adgrg1	Adhesion G-protein coupled receptor G1 OS=Mus musculus OX=10090 GN=Adgrg1 PE=1 SV=1	1319	2	C	UR	110.848	99.726	184.737	112.63	141.061	77.0687	140.001	144.338	108.982	135.387	123.362
sp|Q91WD5|NDUS2_MOUSE	Ndufs2	NADH dehydrogenase [ubiquinone] iron-sulfur protein 2, mitochondrial OS=Mus musculus OX=10090 GN=Ndufs2 PE=1 SV=1	1320	16	C	UR	3031.2	2764.64	3032.89	2956.96	3228.87	2306.54	2346.98	2272.6	1729.93	1811.96	2884.45
sp|Q91Z58|CF132_MOUSE		Uncharacterized protein C6orf132 homolog OS=Mus musculus OX=10090 PE=1 SV=2	1321	1	C	UR	7.59581	19.2903	42.5035	23.0008	20.969	11.5445	12.5943	30.5315	28.3818	28.8905	45.2505
tr|Q9D809|Q9D809_MOUSE	2200002D01Rik	RIKEN cDNA 2200002D01 gene OS=Mus musculus OX=10090 GN=2200002D01Rik PE=1 SV=1	1322	4	C	UR	2537.32	1171.79	422.611	1614.19	927.609	298.553	139.547	805.823	600.733	861.471	984.289
sp|Q03265|ATPA_MOUSE	Atp5f1a	ATP synthase subunit alpha, mitochondrial OS=Mus musculus OX=10090 GN=Atp5f1a PE=1 SV=1	1323	21	C	UR	4743.53	2926.8	2179.78	4914	5293.27	3336.73	987.869	3316.56	2708.66	2667.13	2960.16
sp|Q505F5|LRC47_MOUSE	Lrrc47	Leucine-rich repeat-containing protein 47 OS=Mus musculus OX=10090 GN=Lrrc47 PE=1 SV=1	1324	10	C	UR	781.562	842.314	367.635	702.805	828.621	924.754	299.421	854.863	886.833	788.336	950.769
sp|Q99N57-2|RAF1_MOUSE	Raf1	Isoform 2 of RAF proto-oncogene serine/threonine-protein kinase OS=Mus musculus OX=10090 GN=Raf1	1325	7	C	UR	928.203	729.026	707.813	866.204	495.337	885.701	846.994	656.181	894.304	700.502	673.676
sp|P04627|ARAF_MOUSE	Araf	Serine/threonine-protein kinase A-Raf OS=Mus musculus OX=10090 GN=Araf PE=1 SV=2	1325	3	C	UR	842.853	708.933	570.808	934.833	517.492	1021.24	494.328	821.595	840.547	794.195	660.445
sp|Q75N73|S39AE_MOUSE	Slc39a14	Metal cation symporter ZIP14 OS=Mus musculus OX=10090 GN=Slc39a14 PE=1 SV=1	1326	1	C	UR	225.732	137.034	469.344	304.294	152.212	307.906	260.496	169.189	301.954	293.296	203.625
sp|B2RQC6|PYR1_MOUSE	Cad	CAD protein OS=Mus musculus OX=10090 GN=Cad PE=1 SV=1	1327	12	C	UR	1401.15	1600.39	304.398	2105.96	1647.1	1516.19	418.525	1939.38	2522.16	2068.4	1599.06
sp|Q9D6R2|IDH3A_MOUSE	Idh3a	Isocitrate dehydrogenase [NAD] subunit alpha, mitochondrial OS=Mus musculus OX=10090 GN=Idh3a PE=1 SV=1	1328	10	C	UR	1340.26	2055.02	1071.82	1956.37	1827.06	1527.02	621.651	1678.02	1501.41	1663.65	1686.56
sp|Q9D8E6|RL4_MOUSE	Rpl4	60S ribosomal protein L4 OS=Mus musculus OX=10090 GN=Rpl4 PE=1 SV=3	1329	12	C	UR	1492.82	1747.19	317.595	2111.32	1036.25	1349.13	477.133	1881.38	1692.19	1271.3	1946.32
sp|Q52KI8|SRRM1_MOUSE	Srrm1	Serine/arginine repetitive matrix protein 1 OS=Mus musculus OX=10090 GN=Srrm1 PE=1 SV=2	1330	1	C	UR	539.249	109.217	67.3862	348.293	381.082	251.36	50.4868	551.051	500.702	528.26	677.101
sp|P97372|PSME2_MOUSE	Psme2	Proteasome activator complex subunit 2 OS=Mus musculus OX=10090 GN=Psme2 PE=1 SV=4	1331	6	C	UR	219.938	315.092	247.936	262.038	397.113	245.41	167.211	445.311	488.895	452.596	345.852
sp|Q8BWT5|DIP2A_MOUSE	Dip2a	Disco-interacting protein 2 homolog A OS=Mus musculus OX=10090 GN=Dip2a PE=1 SV=3	1332	9	C	UR	1188.46	900.501	612.471	1075.02	1003.11	1091.36	811.734	933.302	794.817	821.3	1033.17
tr|E9PWR4|E9PWR4_MOUSE	Dip2c	Disco-interacting protein 2 homolog C OS=Mus musculus OX=10090 GN=Dip2c PE=1 SV=1	1332	1	C	UR	39.8474	39.8928	39.3229	43.9201	42.0542	83.8072	17.1464	32.3498	47.667	37.4971	30.554
sp|Q3UH60|DIP2B_MOUSE	Dip2b	Disco-interacting protein 2 homolog B OS=Mus musculus OX=10090 GN=Dip2b PE=1 SV=1	1332	7	C	UR	572.011	500.486	329.373	534.782	489.715	490.715	427.848	415.999	456.81	349.283	457.645
sp|Q5XJE5|LEO1_MOUSE	Leo1	RNA polymerase-associated protein LEO1 OS=Mus musculus OX=10090 GN=Leo1 PE=1 SV=2	1333	5	C	UR	762.457	468.151	119.23	299.991	762.962	372.547	159.211	1044.1	850.388	978.715	819.773
sp|P54869|HMCS2_MOUSE	Hmgcs2	Hydroxymethylglutaryl-CoA synthase, mitochondrial OS=Mus musculus OX=10090 GN=Hmgcs2 PE=1 SV=2	1334	9	C	UR	1338.59	1448.27	644.047	1301.18	659.656	1505.17	370.049	1103.97	630.615	881.221	667.933
sp|Q8JZK9|HMCS1_MOUSE	Hmgcs1	Hydroxymethylglutaryl-CoA synthase, cytoplasmic OS=Mus musculus OX=10090 GN=Hmgcs1 PE=1 SV=1	1334	9	C	UR	1235.12	1707.59	1355.52	1544.93	1690.72	1115.97	735.66	1391.18	1015.08	962.114	1163.68
sp|Q9JJA4|WDR12_MOUSE	Wdr12	Ribosome biogenesis protein WDR12 OS=Mus musculus OX=10090 GN=Wdr12 PE=1 SV=1	1335	7	C	UR	879.405	1246.39	2191.53	1255.18	737.671	763.207	3854.83	956.369	994.772	932.976	972.825
sp|Q8VEB4|PAG15_MOUSE	Pla2g15	Phospholipase A2 group XV OS=Mus musculus OX=10090 GN=Pla2g15 PE=1 SV=1	1336	5	C	UR	481.996	646.199	2060.6	470.687	710.874	571	2284.88	491.629	558.492	611.597	535.476
sp|E2JF22|PIEZ1_MOUSE	Piezo1	Piezo-type mechanosensitive ion channel component 1 OS=Mus musculus OX=10090 GN=Piezo1 PE=1 SV=1	1337	3	C	UR	52.9292	53.4972	249.598	88.8273	9.34454	63.8208	312.126	32.0594	82.2483	54.2118	41.6159
sp|Q8BGA9|OXA1L_MOUSE	Oxa1l	Mitochondrial inner membrane protein OXA1L OS=Mus musculus OX=10090 GN=Oxa1l PE=1 SV=1	1338	1	C	UR	131.021	104.184	395.396	108.997	32.1352	82.2828	291.601	43.4704	97.3636	83.8557	63.5446
sp|Q8C570|RAE1L_MOUSE	Rae1	mRNA export factor OS=Mus musculus OX=10090 GN=Rae1 PE=1 SV=1	1339	10	C	UR	1306.76	1062.16	267.948	1123.32	1602.74	991.482	218.892	1365.24	1142.13	1188.93	1285.08
sp|Q6ZQ08-4|CNOT1_MOUSE	Cnot1	Isoform 4 of CCR4-NOT transcription complex subunit 1 OS=Mus musculus OX=10090 GN=Cnot1	1340	9	C	UR	1058.81	907.391	368.233	1189.3	569.641	1084.9	405.12	748.55	1004.78	755.649	687.917
sp|O88487|DC1I2_MOUSE	Dync1i2	Cytoplasmic dynein 1 intermediate chain 2 OS=Mus musculus OX=10090 GN=Dync1i2 PE=1 SV=1	1341	2	C	UR	96.8861	59.6957	22.6012	96.2053	315.015	70.7832	8.49748	174.576	172.609	303.956	221.974
sp|Q924Z4|CERS2_MOUSE	Cers2	Ceramide synthase 2 OS=Mus musculus OX=10090 GN=Cers2 PE=1 SV=1	1342	1	C	UR	233.241	78.7373	129.404	264.983	56.8392	358.199	63.0353	134.47	288.17	249.292	114.491
sp|P12246|SAMP_MOUSE	Apcs	Serum amyloid P-component OS=Mus musculus OX=10090 GN=Apcs PE=1 SV=2	1343	6	C	UR	428.124	716.651	2222.81	752.27	353.654	408.83	1877.66	319.725	581.753	1085.43	526.935
sp|Q6P7W2|SHKB1_MOUSE	Shkbp1	SH3KBP1-binding protein 1 OS=Mus musculus OX=10090 GN=Shkbp1 PE=1 SV=1	1344	1	C	UR	481.821	394.53	115.716	344.146	499.347	292.078	73.8793	505.634	361.859	370.523	577.253
sp|Q8VEK3|HNRPU_MOUSE	Hnrnpu	Heterogeneous nuclear ribonucleoprotein U OS=Mus musculus OX=10090 GN=Hnrnpu PE=1 SV=1	1345	16	C	UR	3766.82	1575.36	1510.73	2474.4	2163.41	5516.26	1274.12	4332.99	3326.87	4205.35	3422.75
sp|Q8VDL4|ADPGK_MOUSE	Adpgk	ADP-dependent glucokinase OS=Mus musculus OX=10090 GN=Adpgk PE=1 SV=2	1346	6	C	UR	507.933	580.51	907.409	663.994	447.311	488.614	1406.17	374.134	682.743	624.483	509.708
sp|P62192|PRS4_MOUSE	Psmc1	26S proteasome regulatory subunit 4 OS=Mus musculus OX=10090 GN=Psmc1 PE=1 SV=1	1347	11	C	UR	1599.98	1360.65	498.462	1500.22	1615.53	1888.24	293.691	2277.69	2366.56	2606.14	2151.52
sp|P62196|PRS8_MOUSE	Psmc5	26S proteasome regulatory subunit 8 OS=Mus musculus OX=10090 GN=Psmc5 PE=1 SV=1	1347	7	C	UR	1714.21	1874.24	976.571	1761.27	1327.39	1773.1	2005.39	1754.2	1346.79	1662.03	1447.94
sp|Q8BTW3|EXOS6_MOUSE	Exosc6	Exosome complex component MTR3 OS=Mus musculus OX=10090 GN=Exosc6 PE=1 SV=1	1349	3	C	UR	187.809	201.079	35.6674	170.226	344.618	168.334	42.567	284.463	230.495	199.224	283.44
sp|Q8BTH8|KC1G1_MOUSE	Csnk1g1	Casein kinase I isoform gamma-1 OS=Mus musculus OX=10090 GN=Csnk1g1 PE=1 SV=2	1351	1	C	UR	214.293	192.288	142.989	180.055	140.296	171.442	144.135	143.404	165.814	140.102	162.919
sp|Q9Z160|COG1_MOUSE	Cog1	Conserved oligomeric Golgi complex subunit 1 OS=Mus musculus OX=10090 GN=Cog1 PE=1 SV=3	1352	3	C	UR	316.159	196.57	212.663	319.897	263.566	418.751	135.464	325.727	288.781	286.369	259.136
sp|Q61789|LAMA3_MOUSE	Lama3	Laminin subunit alpha-3 OS=Mus musculus OX=10090 GN=Lama3 PE=1 SV=4	1353	14	C	UR	1777.81	1684.44	2606.88	1706.67	1053.6	1028.12	2480.1	813.575	913.538	742.945	1339
sp|Q9CZD3|GARS_MOUSE	Gars1	Glycine--tRNA ligase OS=Mus musculus OX=10090 GN=Gars1 PE=1 SV=1	1354	8	C	UR	1471.39	842.422	389.744	1216.24	1250.74	1667.46	294.399	2102.75	1736.73	2281.58	1690.39
sp|P13864|DNMT1_MOUSE	Dnmt1	DNA (cytosine-5)-methyltransferase 1 OS=Mus musculus OX=10090 GN=Dnmt1 PE=1 SV=5	1355	15	C	UR	1543.31	1206.66	919.075	2056.86	1459.73	1753.38	745.911	2108.92	2688.43	2318.4	1645.03
sp|P59644|PI5PA_MOUSE	Inpp5j	Phosphatidylinositol 4,5-bisphosphate 5-phosphatase A OS=Mus musculus OX=10090 GN=Inpp5j PE=1 SV=2	1356	4	C	UR	539.81	603.306	418.292	505.819	432.737	463.222	290.718	508.592	504.529	456.164	442.98
sp|Q9Z0X1|AIFM1_MOUSE	Aifm1	Apoptosis-inducing factor 1, mitochondrial OS=Mus musculus OX=10090 GN=Aifm1 PE=1 SV=1	1357	10	C	UR	2083.6	1929.55	1415.25	1888.42	1956.93	1570.58	1708.62	1402.11	1194.9	1309.65	1585.8
sp|Q9CPQ8|ATP5L_MOUSE	Atp5mg	ATP synthase subunit g, mitochondrial OS=Mus musculus OX=10090 GN=Atp5mg PE=1 SV=1	1358	3	C	UR	372.182	411.012	228.552	441.013	453.005	316.156	79.1488	360.72	210.66	254.568	270.719
sp|P10711|TCEA1_MOUSE	Tcea1	Transcription elongation factor A protein 1 OS=Mus musculus OX=10090 GN=Tcea1 PE=1 SV=2	1359	5	C	UR	293.269	621.286	163.568	398.607	442.765	395.988	131.956	688.407	721.441	775.098	566.6
sp|P49222|EPB42_MOUSE	Epb42	Erythrocyte membrane protein band 4.2 OS=Mus musculus OX=10090 GN=Epb42 PE=1 SV=3	1360	6	C	UR	306.976	263.408	328.098	356.962	370.361	476.663	189.035	360.447	823.067	595.226	552.446
sp|O54734|OST48_MOUSE	Ddost	Dolichyl-diphosphooligosaccharide--protein glycosyltransferase 48 kDa subunit OS=Mus musculus OX=10090 GN=Ddost PE=1 SV=2	1361	3	C	UR	508.386	451.619	281.222	514.562	281.268	429.172	311.313	241.201	377.177	300.371	350.824
sp|P11157|RIR2_MOUSE	Rrm2	Ribonucleoside-diphosphate reductase subunit M2 OS=Mus musculus OX=10090 GN=Rrm2 PE=1 SV=1	1363	3	C	UR	105.779	131.648	502.537	141.653	102.153	65.7276	572.104	127.321	165.038	107.466	116.483
sp|P54751|SIA4A_MOUSE	St3gal1	CMP-N-acetylneuraminate-beta-galactosamide-alpha-2,3-sialyltransferase 1 OS=Mus musculus OX=10090 GN=St3gal1 PE=1 SV=1	1364	2	C	UR	126.605	61.5392	81.5362	110.833	39.3179	89.0118	48.4432	54.0841	74.815	62.5894	47.6119
sp|Q9EQQ9-3|OGA_MOUSE	Oga	Isoform 3 of Protein O-GlcNAcase OS=Mus musculus OX=10090 GN=Oga	1365	4	C	UR	176.267	170.635	59.6981	219.829	203.931	242.688	41.0729	256.038	209.543	235.363	169.427
sp|P24638|PPAL_MOUSE	Acp2	Lysosomal acid phosphatase OS=Mus musculus OX=10090 GN=Acp2 PE=1 SV=2	1366	4	C	UR	190.821	205.036	543.689	195.533	203.242	153.754	827.465	156.351	153.959	140.116	187.032
sp|O08917|FLOT1_MOUSE	Flot1	Flotillin-1 OS=Mus musculus OX=10090 GN=Flot1 PE=1 SV=1	1367	6	C	UR	333.394	424.19	164.32	468.89	337.985	728.931	152.706	458.601	563.201	1138.94	407.58
tr|E9QA15|E9QA15_MOUSE	Cald1	Caldesmon 1 OS=Mus musculus OX=10090 GN=Cald1 PE=1 SV=1	1367	2	C	UR	38.3233	33.1346	78.27	41.4416	52.7425	50.25	61.846	100.803	133.579	357.394	57.3649
sp|O70572|NSMA_MOUSE	Smpd2	Sphingomyelin phosphodiesterase 2 OS=Mus musculus OX=10090 GN=Smpd2 PE=1 SV=1	1368	7	C	UR	899.286	631.928	330.027	1055.26	214.599	1464.09	287.512	419.604	847.169	690.282	372.398
sp|P08226|APOE_MOUSE	Apoe	Apolipoprotein E OS=Mus musculus OX=10090 GN=Apoe PE=1 SV=2	1369	11	C	UR	1458.08	1320.89	2103.79	1487.07	1114.4	1129.68	1921.06	1224.66	1694.81	1868.2	1680.66
sp|Q80UF4|SDCG8_MOUSE	Sdccag8	Serologically defined colon cancer antigen 8 homolog OS=Mus musculus OX=10090 GN=Sdccag8 PE=1 SV=1	1370	1	C	UR	8.42735	12.4129	10.4739	18.659	4.01963	13.2167	7.744	9.72054	15.5133	11.3784	5.69628
sp|Q9CQQ7|AT5F1_MOUSE	Atp5pb	ATP synthase F(0) complex subunit B1, mitochondrial OS=Mus musculus OX=10090 GN=Atp5pb PE=1 SV=1	1371	12	C	UR	2884.91	2179.66	2756.51	2809.83	2572.07	2515.92	998.441	1723.65	1513.88	1915.39	2385.33
sp|Q9D1R9|RL34_MOUSE	Rpl34	60S ribosomal protein L34 OS=Mus musculus OX=10090 GN=Rpl34 PE=1 SV=2	1372	6	C	UR	1107.14	1514.96	160.226	1436.86	952.082	887.628	306.055	1220.36	1128.73	732.787	1239.15
sp|P47915|RL29_MOUSE	Rpl29	60S ribosomal protein L29 OS=Mus musculus OX=10090 GN=Rpl29 PE=1 SV=2	1373	4	C	UR	485.655	551.078	406.051	740.274	779.867	899.6	411.989	4336.41	1824.24	2632.55	3112.02
sp|Q91ZA3|PCCA_MOUSE	Pcca	Propionyl-CoA carboxylase alpha chain, mitochondrial OS=Mus musculus OX=10090 GN=Pcca PE=1 SV=2	1374	19	C	UR	3447.24	3909.93	1125.54	3631.68	4725.09	2620.21	891.344	2727.07	1946.2	2414.05	2820.42
sp|P51150|RAB7A_MOUSE	Rab7a	Ras-related protein Rab-7a OS=Mus musculus OX=10090 GN=Rab7a PE=1 SV=2	1375	10	C	UR	1399.83	1377.26	721.891	1174.51	1345.36	1106.26	679.567	1535.58	1406.33	1486.16	1611.51
sp|Q8BSY0|ASPH_MOUSE	Asph	Aspartyl/asparaginyl beta-hydroxylase OS=Mus musculus OX=10090 GN=Asph PE=1 SV=1	1376	5	C	UR	629.112	597.639	1031.65	638.846	498.365	728.627	616.463	498.989	727.176	585.121	520.322
sp|P97461|RS5_MOUSE	Rps5	40S ribosomal protein S5 OS=Mus musculus OX=10090 GN=Rps5 PE=1 SV=3	1377	4	C	UR	243.989	254.631	96.0475	334.145	258.196	274.465	115.451	269.095	275.129	156.822	275.005
sp|Q9QXX3|PA2GX_MOUSE	Pla2g10	Group 10 secretory phospholipase A2 OS=Mus musculus OX=10090 GN=Pla2g10 PE=1 SV=1	1378	1	C	UR	57.5485	53.1372	180.923	34.3195	43.3078	16.1407	130.571	26.9056	19.1873	23.217	31.4223
sp|Q9ESB3|HRG_MOUSE	Hrg	Histidine-rich glycoprotein OS=Mus musculus OX=10090 GN=Hrg PE=1 SV=2	1379	11	C	UR	1584.9	1422.37	263.426	1377.95	1105.89	1073.02	352.008	1275.52	2226.08	2637.61	1966.14
sp|Q3UPL0|SC31A_MOUSE	Sec31a	Protein transport protein Sec31A OS=Mus musculus OX=10090 GN=Sec31a PE=1 SV=2	1380	17	C	UR	2452.55	1714.13	818.9	2167.71	1854.81	2625.11	633.077	2084.42	2547.89	2366.59	1889.25
sp|Q9CQ48|NUDC2_MOUSE	Nudcd2	NudC domain-containing protein 2 OS=Mus musculus OX=10090 GN=Nudcd2 PE=1 SV=1	1381	2	C	UR	108.644	168.411	40.708	120.176	70.6792	79.7123	48.9363	104.237	93.3707	119.889	78.8601
sp|Q9CXS4|CENPV_MOUSE	Cenpv	Centromere protein V OS=Mus musculus OX=10090 GN=Cenpv PE=1 SV=2	1383	3	C	UR	423.305	275.009	67.5113	337.056	418.69	479.047	92.008	390.852	410.558	385.43	358.749
sp|Q7TMQ7|WDR91_MOUSE	Wdr91	WD repeat-containing protein 91 OS=Mus musculus OX=10090 GN=Wdr91 PE=1 SV=1	1384	1	C	UR	27.7411	31.032	14.8418	32.2864	30.9172	32.1565	7.86852	26.8553	38.7222	32.3093	32.0887
sp|Q9Z280|PLD1_MOUSE	Pld1	Phospholipase D1 OS=Mus musculus OX=10090 GN=Pld1 PE=1 SV=1	1385	8	C	UR	898.328	702.353	1036.44	914.826	622.362	738.296	853.101	753.473	667.46	631.897	745.358
sp|Q8BR70|YIPF6_MOUSE	Yipf6	Protein YIPF6 OS=Mus musculus OX=10090 GN=Yipf6 PE=1 SV=1	1386	2	C	UR	272.156	204.76	420.462	296.249	161.715	315.68	122.672	180.816	261.335	200.23	146.817
sp|Q9ESJ0|XPO4_MOUSE	Xpo4	Exportin-4 OS=Mus musculus OX=10090 GN=Xpo4 PE=1 SV=2	1387	5	C	UR	467.787	407.308	689.668	562.359	361.309	653.033	569.555	435.833	530.323	458.644	387.727
sp|Q8R0K2|TRI31_MOUSE	Trim31	E3 ubiquitin-protein ligase TRIM31 OS=Mus musculus OX=10090 GN=Trim31 PE=1 SV=1	1388	9	C	UR	1946.58	1778.48	1248.64	2088.92	1221.6	1928.65	822.996	1777.61	1692.79	1608.49	2065.09
sp|Q91YE3|EGLN1_MOUSE	Egln1	Egl nine homolog 1 OS=Mus musculus OX=10090 GN=Egln1 PE=1 SV=2	1389	3	C	UR	175.408	261.114	106.106	179.248	178.09	164.43	59.9379	188.743	210.308	194.295	184.133
sp|Q8CCJ3|UFL1_MOUSE	Ufl1	E3 UFM1-protein ligase 1 OS=Mus musculus OX=10090 GN=Ufl1 PE=1 SV=2	1390	9	C	UR	1521.08	657.897	1281.98	1192.65	718.408	3124.44	1602.5	1185.9	1156.32	1361.84	936.823
sp|P57080|UBP25_MOUSE	Usp25	Ubiquitin carboxyl-terminal hydrolase 25 OS=Mus musculus OX=10090 GN=Usp25 PE=1 SV=2	1391	2	C	UR	156.44	123.729	37.8447	148.632	126.627	138.403	36.9683	149.472	167.261	150.341	139.817
sp|O54692|ZW10_MOUSE	Zw10	Centromere/kinetochore protein zw10 homolog OS=Mus musculus OX=10090 GN=Zw10 PE=1 SV=3	1392	6	C	UR	431.583	279.935	296.685	534.9	241.964	623.75	266.424	397.79	538.735	422.47	342.371
sp|Q9JKF7|RM39_MOUSE	Mrpl39	39S ribosomal protein L39, mitochondrial OS=Mus musculus OX=10090 GN=Mrpl39 PE=1 SV=4	1393	7	C	UR	1579.23	2141.42	854.498	2159	2457.79	1005.22	464.917	1974.48	1404.74	1467.68	2216.4
sp|Q6P5D3|DHX57_MOUSE	Dhx57	Putative ATP-dependent RNA helicase DHX57 OS=Mus musculus OX=10090 GN=Dhx57 PE=1 SV=2	1394	2	C	UR	110.97	114.839	89.7399	139.043	65.6854	166.701	144.535	102.973	119.167	122.7	94.3692
sp|Q08288|LYAR_MOUSE	Lyar	Cell growth-regulating nucleolar protein OS=Mus musculus OX=10090 GN=Lyar PE=1 SV=2	1395	6	C	UR	286.731	645.628	175.952	627.517	749.724	308.691	139.389	1061.05	905.063	1005.91	1030.25
sp|Q8CIZ8|VWF_MOUSE	Vwf	von Willebrand factor OS=Mus musculus OX=10090 GN=Vwf PE=1 SV=2	1396	11	C	UR	336.557	344.939	485.717	314.575	424.226	944.656	162.012	229.928	656.398	473.912	233.491
sp|Q9D0I6|WSDU1_MOUSE	Wdsub1	WD repeat, SAM and U-box domain-containing protein 1 OS=Mus musculus OX=10090 GN=Wdsub1 PE=2 SV=1	1397	2	C	UR	38.98	29.0665	8.15462	32.9903	50.2875	40.5731	8.04406	38.2334	34.6362	31.2912	27.8315
sp|Q9D880|TIM50_MOUSE	Timm50	Mitochondrial import inner membrane translocase subunit TIM50 OS=Mus musculus OX=10090 GN=Timm50 PE=1 SV=1	1398	2	C	UR	71.77	47.5782	150.674	79.5939	28.7898	78.9566	100.373	54.7322	68.59	77.7937	57.9717
sp|P70269|CATE_MOUSE	Ctse	Cathepsin E OS=Mus musculus OX=10090 GN=Ctse PE=1 SV=2	1399	3	C	UR	115.856	275.783	90.143	219.2	872.395	57.011	33.8598	140.609	139.741	108.797	229.696
sp|Q61194|P3C2A_MOUSE	Pik3c2a	Phosphatidylinositol 4-phosphate 3-kinase C2 domain-containing subunit alpha OS=Mus musculus OX=10090 GN=Pik3c2a PE=1 SV=2	1400	6	C	UR	296.584	179.401	141.515	236.642	156.244	328.178	138.282	293.524	326.986	281.313	266.521
tr|A2AQ87|A2AQ87_MOUSE	Shf	SH2 domain-containing adapter protein F (Fragment) OS=Mus musculus OX=10090 GN=Shf PE=1 SV=1	1401	1	C	UR	21.6887	34.4579	48.1193	55.1856	34.3559	24.9749	55.1065	29.7886	39.8277	32.9086	45.0438
sp|Q3U4I7|PYRD2_MOUSE	Pyroxd2	Pyridine nucleotide-disulfide oxidoreductase domain-containing protein 2 OS=Mus musculus OX=10090 GN=Pyroxd2 PE=1 SV=3	1402	1	C	UR	16.4322	17.0476	39.1006	12.6965	17.546	10.37	25.4331	12.6745	12.7446	9.08894	12.745
sp|Q9Z0H8|CLIP2_MOUSE	Clip2	CAP-Gly domain-containing linker protein 2 OS=Mus musculus OX=10090 GN=Clip2 PE=1 SV=2	1403	4	C	UR	216.274	187.828	61.3501	246.622	326.901	179.11	56.8321	471.069	351.19	506.814	363.246
sp|Q922J3|CLIP1_MOUSE	Clip1	CAP-Gly domain-containing linker protein 1 OS=Mus musculus OX=10090 GN=Clip1 PE=1 SV=1	1403	10	C	UR	566.207	611.81	553.279	652.198	932.516	641.512	573.878	1127.08	1017.76	1386.76	987.123
sp|P0C872|JMJD7_MOUSE	Jmjd7	Bifunctional peptidase and (3S)-lysyl hydroxylase Jmjd7 OS=Mus musculus OX=10090 GN=Jmjd7 PE=1 SV=1	1404	2	C	UR	575.899	724.038	141.083	530.336	809.27	502.488	141.673	571.294	403.856	486.05	515.684
sp|O88329|MYO1A_MOUSE	Myo1a	Unconventional myosin-Ia OS=Mus musculus OX=10090 GN=Myo1a PE=2 SV=2	1405	19	C	UR	4828.67	3001.09	3943.54	3941.56	3621.52	3700.07	2886.17	4370.35	2796.93	3146.67	4222.05
sp|Q9WTI7|MYO1C_MOUSE	Myo1c	Unconventional myosin-Ic OS=Mus musculus OX=10090 GN=Myo1c PE=1 SV=2	1405	12	C	UR	1663.67	1388.37	1008.41	1825.73	1193.63	3209.36	803.938	1406.36	2196.63	1927.62	1929.03
sp|P46735|MYO1B_MOUSE	Myo1b	Unconventional myosin-Ib OS=Mus musculus OX=10090 GN=Myo1b PE=1 SV=3	1405	14	C	UR	2251.86	1605.92	1885.1	2098.04	1475.78	2720.51	1544.87	1727.88	1858.23	1766.33	1674.27
sp|Q9DAK9|PHP14_MOUSE	Phpt1	14 kDa phosphohistidine phosphatase OS=Mus musculus OX=10090 GN=Phpt1 PE=1 SV=1	1406	3	C	UR	449.298	481.747	128.204	288.936	556.308	381.366	83.3083	469.923	408.212	460.077	423.543
sp|Q91W36|UBP3_MOUSE	Usp3	Ubiquitin carboxyl-terminal hydrolase 3 OS=Mus musculus OX=10090 GN=Usp3 PE=2 SV=1	1407	1	C	UR	23.8889	24.4097	9.38405	28.1678	14.1528	25.5457	5.11081	23.2299	28.9127	23.2311	18.5548
sp|Q9CZU3|MTREX_MOUSE	Mtrex	Exosome RNA helicase MTR4 OS=Mus musculus OX=10090 GN=Mtrex PE=1 SV=1	1408	14	C	UR	1509.82	1800.12	1080.01	1817.98	1409.4	1801.06	984.891	1879.41	2212.15	1664.09	1728
sp|P14602|HSPB1_MOUSE	Hspb1	Heat shock protein beta-1 OS=Mus musculus OX=10090 GN=Hspb1 PE=1 SV=3	1409	5	C	UR	255.729	204.693	194.089	399.171	301.852	1415.92	86.8406	963.951	650.205	4006.08	493.94
sp|P97449|AMPN_MOUSE	Anpep	Aminopeptidase N OS=Mus musculus OX=10090 GN=Anpep PE=1 SV=4	1410	13	C	UR	1916.15	2088.04	2707.77	1068.01	1306.69	1801.96	3498.48	888.985	1240.18	826.137	846.399
sp|Q9Z2I8|SUCB2_MOUSE	Suclg2	Succinate--CoA ligase [GDP-forming] subunit beta, mitochondrial OS=Mus musculus OX=10090 GN=Suclg2 PE=1 SV=3	1411	12	C	UR	2624.66	2471.95	1552.65	2837.62	2301.75	2494.48	646.184	1960.63	1882.18	2145.41	2308.53
sp|P46638|RB11B_MOUSE	Rab11b	Ras-related protein Rab-11B OS=Mus musculus OX=10090 GN=Rab11b PE=1 SV=3	1412	4	C	UR	646.818	479.531	490.209	528.973	636.808	758.43	462.145	953.691	640.097	855.418	794.86
sp|Q3UQ84|SYTM_MOUSE	Tars2	Threonine--tRNA ligase, mitochondrial OS=Mus musculus OX=10090 GN=Tars2 PE=1 SV=1	1413	3	C	UR	196.572	366.073	159.423	249.996	259.639	226.61	110.866	253.823	232.936	204.429	233.324
sp|P56567|CYTA_MOUSE	Csta	Cystatin-A OS=Mus musculus OX=10090 GN=Csta PE=3 SV=1	1414	1	C	UR	61.2129	198.657	866.473	82.3648	96.6706	16.9032	449.144	82.9053	29.1657	36.8024	96.4078
sp|Q6R891|NEB2_MOUSE	Ppp1r9b	Neurabin-2 OS=Mus musculus OX=10090 GN=Ppp1r9b PE=1 SV=1	1415	2	C	UR	305.681	250.438	77.2409	239.217	308.377	241.355	57.4547	333.269	348.591	366.972	397.999
sp|Q9JMA1|UBP14_MOUSE	Usp14	Ubiquitin carboxyl-terminal hydrolase 14 OS=Mus musculus OX=10090 GN=Usp14 PE=1 SV=3	1416	11	C	UR	1340.27	1137.57	776.39	1201.38	1042.66	1220.27	718.938	1259.94	1211.23	1206.5	1227.56
tr|Q9Z1A1|Q9Z1A1_MOUSE	Tfg	TFG protein OS=Mus musculus OX=10090 GN=Tfg PE=1 SV=1	1417	2	C	UR	567.905	453.495	574.943	486.555	626.558	511.605	374.063	560.405	432.676	445.086	467.54
sp|Q61035|HARS1_MOUSE	Hars1	Histidine--tRNA ligase, cytoplasmic OS=Mus musculus OX=10090 GN=Hars1 PE=1 SV=2	1418	16	C	UR	2312.77	2821.79	5620.76	2087.94	3050.4	1987.64	7853.59	3242.98	2987.86	2671.66	3432.6
sp|Q99KK9|SYHM_MOUSE	Hars2	Histidine--tRNA ligase, mitochondrial OS=Mus musculus OX=10090 GN=Hars2 PE=1 SV=1	1418	7	C	UR	677.587	857.501	505.868	788.056	839.324	522.171	432.909	740.521	641.789	609.84	974.833
sp|E9PV24|FIBA_MOUSE	Fga	Fibrinogen alpha chain OS=Mus musculus OX=10090 GN=Fga PE=1 SV=1	1419	12	C	UR	1085.29	946.272	644.421	2130.53	885.843	1171.9	1109.56	3150.9	2564.64	5975.61	1846.29
tr|A2AFG8|A2AFG8_MOUSE	L1cam	Neural cell adhesion molecule L1 OS=Mus musculus OX=10090 GN=L1cam PE=1 SV=1	1420	8	C	UR	969.836	1146.96	353.734	732.569	1201.88	1074.71	491.158	1106.3	608.067	923.62	755.217
sp|Q9DBG1|CP27A_MOUSE	Cyp27a1	Sterol 26-hydroxylase, mitochondrial OS=Mus musculus OX=10090 GN=Cyp27a1 PE=1 SV=1	1421	2	C	UR	88.9245	69.152	320.92	92.4578	39.374	131.258	223.356	41.6905	60.4347	72.1664	50.1199
sp|Q8BTS4|NUP54_MOUSE	Nup54	Nuclear pore complex protein Nup54 OS=Mus musculus OX=10090 GN=Nup54 PE=1 SV=1	1422	8	C	UR	1551.44	1400.41	535.176	2116.78	884.1	1878.01	335.172	1430.73	2093.71	1970.08	1199.08
sp|Q9R0A1|CLCN2_MOUSE	Clcn2	Chloride channel protein 2 OS=Mus musculus OX=10090 GN=Clcn2 PE=1 SV=2	1423	3	C	UR	269.689	278.839	78.0814	224.956	97.2278	165.045	90.8119	141.269	206.416	135.515	137.969
sp|P61406|EST1A_MOUSE	Smg6	Telomerase-binding protein EST1A OS=Mus musculus OX=10090 GN=Smg6 PE=1 SV=1	1424	1	C	UR	15.4816	18.5596	15.3095	18.7043	14.543	30.5267	17.3989	26.5262	31.2702	26.3857	18.789
sp|P34152-2|FAK1_MOUSE	Ptk2	Isoform 2 of Focal adhesion kinase 1 OS=Mus musculus OX=10090 GN=Ptk2	1425	5	C	UR	678.829	446.458	207.428	607.95	501.782	715.778	182.271	697.108	978.185	908.917	703.55
sp|P97499|TEP1_MOUSE	Tep1	Telomerase protein component 1 OS=Mus musculus OX=10090 GN=Tep1 PE=1 SV=1	1426	15	C	UR	2161.16	1967.14	656.136	1835.75	2086.16	1522.38	737.931	1799.92	1359.4	1423.46	1831.78
sp|Q9JJ11|TACC3_MOUSE	Tacc3	Transforming acidic coiled-coil-containing protein 3 OS=Mus musculus OX=10090 GN=Tacc3 PE=1 SV=1	1427	3	C	UR	215.206	302.909	60.8619	316.859	442.042	172.831	41.4678	339.494	364.662	286.133	282.799
sp|Q9D081|ALG14_MOUSE	Alg14	UDP-N-acetylglucosamine transferase subunit ALG14 homolog OS=Mus musculus OX=10090 GN=Alg14 PE=1 SV=1	1428	1	C	UR	30.8443	7.57019	19.9945	27.8204	7.93414	47.6458	10.3435	6.43339	17.0102	18.6911	9.82124
sp|Q60675|LAMA2_MOUSE	Lama2	Laminin subunit alpha-2 OS=Mus musculus OX=10090 GN=Lama2 PE=1 SV=2	1429	23	C	UR	1153.9	1962.33	6116.94	1675.38	1958.16	3798.53	6588.54	1188.15	1654.22	1629.74	950.308
sp|Q9R1T2|SAE1_MOUSE	Sae1	SUMO-activating enzyme subunit 1 OS=Mus musculus OX=10090 GN=Sae1 PE=1 SV=1	1430	4	C	UR	823.632	794.552	1351.2	927.76	987.439	1002.64	1498.69	1200.3	984.744	947.46	944.896
sp|Q3UTJ2-2|SRBS2_MOUSE	Sorbs2	Isoform 2 of Sorbin and SH3 domain-containing protein 2 OS=Mus musculus OX=10090 GN=Sorbs2	1431	3	C	UR	309.35	341.119	66.2415	385.8	389.072	1232.4	93.423	364.693	436.073	766.714	300.149
sp|P84096|RHOG_MOUSE	Rhog	Rho-related GTP-binding protein RhoG OS=Mus musculus OX=10090 GN=Rhog PE=1 SV=1	1432	5	C	UR	486.84	339.044	352.565	507.598	298.72	595.816	336.046	451.803	724.044	688.537	430.304
sp|Q05144|RAC2_MOUSE	Rac2	Ras-related C3 botulinum toxin substrate 2 OS=Mus musculus OX=10090 GN=Rac2 PE=1 SV=1	1432	2	C	UR	601.142	936.539	722.056	493.187	317.264	341.677	591.468	238.408	363.623	356.969	332.83
sp|P60766|CDC42_MOUSE	Cdc42	Cell division control protein 42 homolog OS=Mus musculus OX=10090 GN=Cdc42 PE=1 SV=2	1432	6	C	UR	916.483	1013.02	901.013	1115.49	901.737	933.553	603.967	1162.52	1201.91	1142.4	1333.15
sp|Q8BG07|PLD4_MOUSE	Pld4	5'-3' exonuclease PLD4 OS=Mus musculus OX=10090 GN=Pld4 PE=1 SV=1	1433	5	C	UR	224.876	262.733	880.952	266.54	295.27	429.742	1190.29	348.502	539.199	666.041	356.717
sp|O08539|BIN1_MOUSE	Bin1	Myc box-dependent-interacting protein 1 OS=Mus musculus OX=10090 GN=Bin1 PE=1 SV=1	1434	7	C	UR	582.839	519.627	101.594	381.174	909.191	635.741	102.608	912.074	839.593	1089.53	782.796
sp|Q91VY9|ZN622_MOUSE	Znf622	Zinc finger protein 622 OS=Mus musculus OX=10090 GN=Znf622 PE=1 SV=1	1435	1	C	UR	28.5409	26.6929	13.6796	26.2179	42.0889	18.7451	6.35146	83.7565	59.0834	73.7505	60.2448
sp|Q9WUD1|CHIP_MOUSE	Stub1	STIP1 homology and U box-containing protein 1 OS=Mus musculus OX=10090 GN=Stub1 PE=1 SV=1	1436	2	C	UR	222.211	182.755	86.1153	195.907	281.5	154.33	80.7599	377.888	262.727	357.348	351.402
sp|Q9JJG0|TACC2_MOUSE	Tacc2	Transforming acidic coiled-coil-containing protein 2 OS=Mus musculus OX=10090 GN=Tacc2 PE=1 SV=2	1437	1	C	UR	49.3068	56.7517	7.64195	44.8734	36.1697	29.0838	2.74817	26.6649	32.317	30.1485	32.5972
sp|Q8BVL3|SNX17_MOUSE	Snx17	Sorting nexin-17 OS=Mus musculus OX=10090 GN=Snx17 PE=1 SV=2	1438	3	C	UR	173.482	164.08	212.818	192.058	105.515	208.702	193.932	130.534	172.415	132.372	144.927
sp|Q80TY0|FNBP1_MOUSE	Fnbp1	Formin-binding protein 1 OS=Mus musculus OX=10090 GN=Fnbp1 PE=1 SV=2	1439	4	C	UR	833.933	918.637	243.246	829.999	1255.8	1258.08	311.53	1195.18	1402.65	1574.17	1185.99
sp|Q8BYW1|RHG25_MOUSE	Arhgap25	Rho GTPase-activating protein 25 OS=Mus musculus OX=10090 GN=Arhgap25 PE=1 SV=2	1440	7	C	UR	475.926	444.228	1077.6	537.922	594.399	721.582	1011.28	661.866	894.995	908.106	644.286
sp|P62082|RS7_MOUSE	Rps7	40S ribosomal protein S7 OS=Mus musculus OX=10090 GN=Rps7 PE=2 SV=1	1441	4	C	UR	312.005	626.858	128.713	650.245	784.701	441.019	84.9528	826.384	725.424	523.109	810.297
sp|Q8CJ53|CIP4_MOUSE	Trip10	Cdc42-interacting protein 4 OS=Mus musculus OX=10090 GN=Trip10 PE=1 SV=2	1442	3	C	UR	369.908	456.338	328.133	357.617	443.629	308.122	490.285	384.092	338.447	349.291	393.845
sp|Q8K012|FBP1L_MOUSE	Fnbp1l	Formin-binding protein 1-like OS=Mus musculus OX=10090 GN=Fnbp1l PE=1 SV=2	1443	3	C	UR	436.641	413.378	124.371	324.919	396.68	296.121	83.9047	284.5	323.436	269.529	383.782
tr|E0CZ42|E0CZ42_MOUSE	Fer1l6	Fer-1-like 6 (C. elegans) OS=Mus musculus OX=10090 GN=Fer1l6 PE=1 SV=1	1444	19	C	UR	1868.58	1460.88	2551.3	1507.36	1913.48	1310.19	1830.34	1062.64	1147.1	859.645	1438.73
sp|P35292|RAB17_MOUSE	Rab17	Ras-related protein Rab-17 OS=Mus musculus OX=10090 GN=Rab17 PE=1 SV=1	1445	3	C	UR	160.197	108.151	88.0245	110.669	78.6707	133.712	92.0734	88.8733	93.5466	93.5655	104.471
sp|Q8VDM4|PSMD2_MOUSE	Psmd2	26S proteasome non-ATPase regulatory subunit 2 OS=Mus musculus OX=10090 GN=Psmd2 PE=1 SV=1	1446	19	C	UR	3727.26	3900.38	841.988	4089.65	3572.97	2962.66	1010.33	3609.73	3715.82	3224.21	3683.01
sp|Q811I0|ATPF1_MOUSE	Atpaf1	ATP synthase mitochondrial F1 complex assembly factor 1 OS=Mus musculus OX=10090 GN=Atpaf1 PE=1 SV=1	1447	5	C	UR	376.661	411.872	109.058	402.536	504.103	304.856	94.3829	511.74	396.036	450.041	569.222
sp|Q9D3D9|ATPD_MOUSE	Atp5f1d	ATP synthase subunit delta, mitochondrial OS=Mus musculus OX=10090 GN=Atp5f1d PE=1 SV=1	1448	4	C	UR	738.72	581.554	32.1348	717.304	1037.72	454.656	25.2965	635.874	446.336	574.076	740.387
sp|P14483|HB2A_MOUSE	H2-Ab1	H-2 class II histocompatibility antigen, A beta chain OS=Mus musculus OX=10090 GN=H2-Ab1 PE=1 SV=1	1449	4	C	UR	68.037	51.9886	413.561	73.7872	74.5435	127.402	1221.24	87.6002	90.612	112.936	83.2587
tr|O78196|O78196_MOUSE	H2-Eb1	H-2 class II histocompatibility antigen, I-A beta chain OS=Mus musculus OX=10090 GN=H2-Eb1 PE=1 SV=1	1450	2	C	UR	141.711	109.655	304.162	229.051	96.0777	420.023	319.635	144.917	495.544	448.793	135.954
sp|Q9D2R0|AACS_MOUSE	Aacs	Acetoacetyl-CoA synthetase OS=Mus musculus OX=10090 GN=Aacs PE=1 SV=1	1451	8	C	UR	916.586	811.096	868.834	1274.87	1020.86	1277.85	651.56	1269.44	1288.14	1280.55	1227.51
sp|Q8BGQ7|SYAC_MOUSE	Aars1	Alanine--tRNA ligase, cytoplasmic OS=Mus musculus OX=10090 GN=Aars1 PE=1 SV=1	1452	12	C	UR	2737.72	4733.64	2128.98	2566.84	2493.66	2622.53	1733.47	2543.51	3243.88	2713.92	2152.46
sp|P60122|RUVB1_MOUSE	Ruvbl1	RuvB-like 1 OS=Mus musculus OX=10090 GN=Ruvbl1 PE=1 SV=1	1453	18	C	UR	2671.83	2274.67	299.779	2645.11	3102.08	2502.49	306.759	2923.03	2554.54	2620.62	2861.18
sp|Q810D6|GRWD1_MOUSE	Grwd1	Glutamate-rich WD repeat-containing protein 1 OS=Mus musculus OX=10090 GN=Grwd1 PE=1 SV=2	1454	6	C	UR	274.248	227.067	208.383	342.775	473.181	372.539	301.899	987.368	860.053	738.307	683.793
sp|P31230|AIMP1_MOUSE	Aimp1	Aminoacyl tRNA synthase complex-interacting multifunctional protein 1 OS=Mus musculus OX=10090 GN=Aimp1 PE=1 SV=2	1455	12	C	UR	1240.09	1474.69	566.082	935.331	1304.18	891.652	530.216	1109.82	918.607	1000.29	1046.61
sp|P03987|IGHG3_MOUSE		Ig gamma-3 chain C region OS=Mus musculus OX=10090 PE=1 SV=2	1456	4	C	UR	100.804	169.983	173.997	212.027	189.075	65.3212	244.145	197.604	241.93	288.94	298.24
sp|Q9JHI7|EXOS9_MOUSE	Exosc9	Exosome complex component RRP45 OS=Mus musculus OX=10090 GN=Exosc9 PE=1 SV=1	1457	1	C	UR	12.0186	8.91603	5.7954	9.70364	117.069	26.0639	5.22239	105.314	36.5673	45.1596	97.5298
sp|Q8BH60|GOPC_MOUSE	Gopc	Golgi-associated PDZ and coiled-coil motif-containing protein OS=Mus musculus OX=10090 GN=Gopc PE=1 SV=1	1458	4	C	UR	921.261	797.006	61.4959	996.793	912.968	1758.11	117.226	1180.77	1080.32	1205.24	976.635
sp|Q8K010|OPLA_MOUSE	Oplah	5-oxoprolinase OS=Mus musculus OX=10090 GN=Oplah PE=1 SV=1	1459	10	C	UR	1100.81	716.795	564.284	828.024	1430.66	1004.22	618.953	756.281	686.406	786.238	626.576
sp|Q80TH2-2|ERBIN_MOUSE	Erbin	Isoform 2 of Erbin OS=Mus musculus OX=10090 GN=Erbin	1460	10	C	UR	2648.47	2857.14	987.757	2836.92	2310.31	2207.44	778.697	2390	2515.06	2338.99	3084.53
sp|Q9QYE6|GOGA5_MOUSE	Golga5	Golgin subfamily A member 5 OS=Mus musculus OX=10090 GN=Golga5 PE=1 SV=2	1461	4	C	UR	552.066	154.654	70.7847	204.036	830.334	463.666	53.5536	1187.33	614.63	1128.06	903.442
sp|Q61133|GSTT2_MOUSE	Gstt2	Glutathione S-transferase theta-2 OS=Mus musculus OX=10090 GN=Gstt2 PE=1 SV=4	1462	3	C	UR	408.152	316.402	120.534	261.884	405.005	308.098	169.304	278.136	263.581	248.567	256.384
sp|Q99L20|GSTT3_MOUSE	Gstt3	Glutathione S-transferase theta-3 OS=Mus musculus OX=10090 GN=Gstt3 PE=1 SV=1	1462	2	C	UR	54.3811	59.4109	71.6027	61.903	59.6849	84.4638	32.2744	81.556	84.602	80.0736	95.6853
sp|O35215|DOPD_MOUSE	Ddt	D-dopachrome decarboxylase OS=Mus musculus OX=10090 GN=Ddt PE=1 SV=3	1462	5	C	UR	679.874	943.892	988.623	560.067	996.328	529.997	2266.28	738.13	516.149	646.186	661.285
tr|D3Z3Y1|D3Z3Y1_MOUSE	Pigg	Phosphatidylinositol glycan anchor biosynthesis, class G OS=Mus musculus OX=10090 GN=Pigg PE=1 SV=1	1463	1	C	UR	209.483	136.299	142.697	212.959	70.1431	224.702	157.55	82.859	138.925	118.074	98.0483
sp|Q9Z2I9|SUCB1_MOUSE	Sucla2	Succinate--CoA ligase [ADP-forming] subunit beta, mitochondrial OS=Mus musculus OX=10090 GN=Sucla2 PE=1 SV=2	1464	9	C	UR	867.577	844.728	868.31	990.478	620.682	1021.91	605.869	674.509	746.029	837.533	743.187
sp|Q61805|LBP_MOUSE	Lbp	Lipopolysaccharide-binding protein OS=Mus musculus OX=10090 GN=Lbp PE=1 SV=2	1465	2	C	UR	116.318	174.608	82.1082	223.303	107.952	178.177	114.141	127.414	237.917	211.247	204.889
sp|Q8C2E7|WASC5_MOUSE	Washc5	WASH complex subunit 5 OS=Mus musculus OX=10090 GN=Washc5 PE=1 SV=2	1466	7	C	UR	528.314	546.563	293.978	684.407	401.036	736.217	252.663	501.411	637.978	602.362	433.963
sp|O35129|PHB2_MOUSE	Phb2	Prohibitin-2 OS=Mus musculus OX=10090 GN=Phb2 PE=1 SV=1	1467	11	C	UR	1722.97	1716.32	2474.14	2113.74	1797.79	1411.22	2557.51	1917.71	1330.15	1217.83	1758.27
sp|P50428|ARSA_MOUSE	Arsa	Arylsulfatase A OS=Mus musculus OX=10090 GN=Arsa PE=1 SV=2	1468	2	C	UR	381.811	718.931	780.184	396.258	487.27	577.129	1144.74	409.158	364.845	502.357	393.909
sp|Q8K0V4|CNOT3_MOUSE	Cnot3	CCR4-NOT transcription complex subunit 3 OS=Mus musculus OX=10090 GN=Cnot3 PE=1 SV=1	1469	2	C	UR	432.702	432.11	387.021	513.501	504.837	388.131	298.625	483.692	517.353	429.705	524.256
sp|O70362|PHLD_MOUSE	Gpld1	Phosphatidylinositol-glycan-specific phospholipase D OS=Mus musculus OX=10090 GN=Gpld1 PE=1 SV=1	1470	10	C	UR	493.409	565.286	1627.15	419.368	412.788	278.006	1553.71	385.531	453.116	530.342	613.179
sp|P50518|VATE1_MOUSE	Atp6v1e1	V-type proton ATPase subunit E 1 OS=Mus musculus OX=10090 GN=Atp6v1e1 PE=1 SV=2	1471	3	C	UR	449.771	460.516	130.508	372.139	593.882	380.344	127.675	436.959	412.831	346.704	461.943
sp|Q2EMV9|PAR14_MOUSE	Parp14	Protein mono-ADP-ribosyltransferase PARP14 OS=Mus musculus OX=10090 GN=Parp14 PE=1 SV=3	1472	13	C	UR	1523.95	980.723	766.862	1286.32	963.845	1775.86	885.186	1582.06	2060.9	1562.84	1737.15
sp|Q8R1F1|NIBA2_MOUSE	Niban2	Protein Niban 2 OS=Mus musculus OX=10090 GN=Niban2 PE=1 SV=2	1473	5	C	UR	427.066	423.47	158.237	495.476	399.465	461.289	134.085	508.571	488.972	419.85	439.59
sp|O55229|CHKB_MOUSE	Chkb	Choline/ethanolamine kinase OS=Mus musculus OX=10090 GN=Chkb PE=1 SV=3	1474	3	C	UR	637.024	558.852	1560.53	465.547	570.757	439.438	2329.41	407.624	414.069	365.538	519.686
sp|Q9WUB3|PYGM_MOUSE	Pygm	Glycogen phosphorylase, muscle form OS=Mus musculus OX=10090 GN=Pygm PE=1 SV=3	1475	5	C	UR	302.421	324.332	446.937	316.758	239.949	1271.13	510.152	298.46	498.874	559.828	203.096
sp|Q8CI94|PYGB_MOUSE	Pygb	Glycogen phosphorylase, brain form OS=Mus musculus OX=10090 GN=Pygb PE=1 SV=3	1475	15	C	UR	1360.43	1240.69	582.765	1493.91	1452.53	2477.95	615.011	1483.68	1655.5	1691.36	1443.17
sp|Q9ET01|PYGL_MOUSE	Pygl	Glycogen phosphorylase, liver form OS=Mus musculus OX=10090 GN=Pygl PE=1 SV=4	1475	8	C	UR	514.94	595.947	1705.37	775.194	481.303	747.867	2189.71	606.259	1222.18	1145.67	607.298
sp|O35682|MYADM_MOUSE	Myadm	Myeloid-associated differentiation marker OS=Mus musculus OX=10090 GN=Myadm PE=1 SV=2	1476	3	C	UR	56.8236	59.0947	267.001	105.833	42.2897	168.874	156.146	52.0021	106.668	82.5671	61.0937
sp|P11928|OAS1A_MOUSE	Oas1a	2'-5'-oligoadenylate synthase 1A OS=Mus musculus OX=10090 GN=Oas1a PE=1 SV=2	1477	6	C	UR	1310.72	685.328	2488.56	998.853	923.981	1518.05	1264.69	844.361	875.856	706.868	954.826
sp|Q62393|TPD52_MOUSE	Tpd52	Tumor protein D52 OS=Mus musculus OX=10090 GN=Tpd52 PE=1 SV=2	1478	3	C	UR	985.457	209.736	138.808	233.912	717.562	974.834	154.45	555.985	228.662	366.271	517.698
tr|E9PUL3|E9PUL3_MOUSE	Clca3b	Chloride channel accessory 3B OS=Mus musculus OX=10090 GN=Clca3b PE=1 SV=1	1479	11	C	UR	376.887	566.585	1578.04	578.378	741.533	354.215	1896.95	675.15	601.265	454.855	806.302
sp|Q9DAS9|GBG12_MOUSE	Gng12	Guanine nucleotide-binding protein G(I)/G(S)/G(O) subunit gamma-12 OS=Mus musculus OX=10090 GN=Gng12 PE=1 SV=3	1480	6	C	UR	772.708	659.053	159.522	662.61	758.119	517.672	190.658	616.674	576.48	454.873	715.874
sp|Q9WUA2|SYFB_MOUSE	Farsb	Phenylalanine--tRNA ligase beta subunit OS=Mus musculus OX=10090 GN=Farsb PE=1 SV=2	1481	9	C	UR	1493.53	1404.14	679.466	1405.16	1542.48	1581.95	377.822	1550.37	1630.84	1395.95	1425.38
sp|Q9WV92-3|E41L3_MOUSE	Epb41l3	Isoform 3 of Band 4.1-like protein 3 OS=Mus musculus OX=10090 GN=Epb41l3	1482	6	C	UR	524.335	542.218	682.501	656.995	442.747	608.196	501.565	544.084	650.43	719.969	642.335
sp|O70318|E41L2_MOUSE	Epb41l2	Band 4.1-like protein 2 OS=Mus musculus OX=10090 GN=Epb41l2 PE=1 SV=2	1482	5	C	UR	153.191	142.943	187.327	191.706	155.26	227.84	105.67	222.895	373.405	494.78	269.393
tr|E9PV14|E9PV14_MOUSE	Epb41l1	Band 4.1-like protein 1 OS=Mus musculus OX=10090 GN=Epb41l1 PE=1 SV=2	1482	4	C	UR	526.29	562.394	456.944	621.286	353.922	466.743	333.177	381.234	361.27	394.328	385.725
sp|Q9CPY7|AMPL_MOUSE	Lap3	Cytosol aminopeptidase OS=Mus musculus OX=10090 GN=Lap3 PE=1 SV=3	1483	16	C	UR	2121.61	2559.92	5887.43	1871.05	2505.67	1508.68	9453.79	2415.4	1761.54	2021.62	2399.41
sp|Q68EF0|RAB3I_MOUSE	Rab3ip	Rab-3A-interacting protein OS=Mus musculus OX=10090 GN=Rab3ip PE=1 SV=1	1484	3	C	UR	380.331	285.207	435.819	391.97	217.039	527.945	286.17	330.073	339.442	322.574	294.384
sp|Q9ES74|NEK7_MOUSE	Nek7	Serine/threonine-protein kinase Nek7 OS=Mus musculus OX=10090 GN=Nek7 PE=1 SV=1	1485	5	C	UR	634.277	459.508	161.495	677.778	379.014	957.107	172.739	674.784	848.631	784.476	565.353
sp|P0CW03|LY6C2_MOUSE	Ly6c2	Lymphocyte antigen 6C2 OS=Mus musculus OX=10090 GN=Ly6c2 PE=1 SV=1	1486	1	C	UR	14.5841	17.9123	13.7342	19.3152	15.3843	20.8188	21.6021	20.3594	31.1208	24.0379	28.5398
sp|Q8CFI5|SYPM_MOUSE	Pars2	Probable proline--tRNA ligase, mitochondrial OS=Mus musculus OX=10090 GN=Pars2 PE=1 SV=2	1487	3	C	UR	519.38	492.4	1057.71	627.113	311.536	609.409	558.543	451.682	444.426	471.477	391.582
sp|Q8CHT1|NGEF_MOUSE	Ngef	Ephexin-1 OS=Mus musculus OX=10090 GN=Ngef PE=1 SV=1	1488	2	C	UR	183.13	59.5674	198.243	79.3132	64.9827	88.2907	697.134	85.0763	31.4338	79.1776	78.1449
sp|Q6ZQI3|MLEC_MOUSE	Mlec	Malectin OS=Mus musculus OX=10090 GN=Mlec PE=1 SV=2	1489	6	C	UR	1416.88	1261.31	2777.15	1463.05	644.397	1372.11	3293.27	628.867	867.065	734.501	888.421
sp|O88545|CSN6_MOUSE	Cops6	COP9 signalosome complex subunit 6 OS=Mus musculus OX=10090 GN=Cops6 PE=1 SV=1	1490	5	C	UR	599.888	498.283	71.3161	565.199	1032.28	649.1	82.9971	738.817	614.369	648.368	797.169
sp|O55111|DSG2_MOUSE	Dsg2	Desmoglein-2 OS=Mus musculus OX=10090 GN=Dsg2 PE=1 SV=3	1491	19	C	UR	2800.17	4548.26	662.354	4293.72	3141.64	1963.08	586.984	2721.28	2419.31	3312.6	4032.46
sp|P24063|ITAL_MOUSE	Itgal	Integrin alpha-L OS=Mus musculus OX=10090 GN=Itgal PE=1 SV=2	1492	5	C	UR	116.374	126.15	428.2	179.04	121.351	249.722	946.94	170.662	307.35	258.765	175.451
sp|Q91XA2|GOLM1_MOUSE	Golm1	Golgi membrane protein 1 OS=Mus musculus OX=10090 GN=Golm1 PE=1 SV=2	1493	12	C	UR	2056.79	1605.77	2506.53	2264.65	1132.33	1705.59	655.74	1426.86	1616.45	1933.01	1590.6
sp|Q80TM9|NISCH_MOUSE	Nisch	Nischarin OS=Mus musculus OX=10090 GN=Nisch PE=1 SV=2	1494	3	C	UR	138.691	107.035	82.3075	158.243	169.281	171.185	57.7217	200.885	218.567	237.958	172.029
sp|Q8R123-2|FAD1_MOUSE	Flad1	Isoform 2 of FAD synthase OS=Mus musculus OX=10090 GN=Flad1	1495	8	C	UR	886.858	1017.78	330.569	968.33	989.222	1142.73	143.915	1181.03	1222.81	1183.5	1319.77
tr|E9Q2E4|E9Q2E4_MOUSE	Hectd4	HECT domain E3 ubiquitin protein ligase 4 OS=Mus musculus OX=10090 GN=Hectd4 PE=1 SV=2	1497	8	C	UR	406.738	272.389	195.024	462.422	278.659	517.045	119.787	414.106	487.5	430.187	349.601
sp|Q00623|APOA1_MOUSE	Apoa1	Apolipoprotein A-I OS=Mus musculus OX=10090 GN=Apoa1 PE=1 SV=2	1498	9	C	UR	2289.59	1162.35	691.901	1662.21	2922.33	2892.48	543.396	2545.86	3114.46	3627.43	3975.46
sp|Q9Z0H3|SNF5_MOUSE	Smarcb1	SWI/SNF-related matrix-associated actin-dependent regulator of chromatin subfamily B member 1 OS=Mus musculus OX=10090 GN=Smarcb1 PE=1 SV=1	1499	3	C	UR	247.594	192.788	42.4978	239.259	412.055	285.608	38.1219	357.183	326.497	343.654	339.486
sp|B2RXC1|TPC11_MOUSE	Trappc11	Trafficking protein particle complex subunit 11 OS=Mus musculus OX=10090 GN=Trappc11 PE=1 SV=1	1500	5	C	UR	1149.3	1044.83	518.378	1238.61	755.49	1128.85	462.614	1009.75	1026.52	1012.13	969.662
sp|O55135|IF6_MOUSE	Eif6	Eukaryotic translation initiation factor 6 OS=Mus musculus OX=10090 GN=Eif6 PE=1 SV=2	1501	3	C	UR	375.506	588.378	219.328	380.25	485.094	309.504	366.904	513.384	463.967	438.483	486.643
sp|O09174|AMACR_MOUSE	Amacr	Alpha-methylacyl-CoA racemase OS=Mus musculus OX=10090 GN=Amacr PE=1 SV=4	1502	4	C	UR	233.875	225.029	168.556	219.451	289.445	164.668	120.914	189.419	164.296	163.251	256.716
sp|Q9CWN7|CNO11_MOUSE	Cnot11	CCR4-NOT transcription complex subunit 11 OS=Mus musculus OX=10090 GN=Cnot11 PE=1 SV=1	1503	2	C	UR	284.941	124.444	37.0758	275.453	194.901	455.553	32.2611	274.738	274.065	301.795	240.98
sp|Q9JLT4|TRXR2_MOUSE	Txnrd2	Thioredoxin reductase 2, mitochondrial OS=Mus musculus OX=10090 GN=Txnrd2 PE=1 SV=4	1504	3	C	UR	234.246	229.976	927.166	210.729	251.124	156.478	1047.17	182.664	148.369	197.591	214.729
sp|Q9JMH6|TRXR1_MOUSE	Txnrd1	Thioredoxin reductase 1, cytoplasmic OS=Mus musculus OX=10090 GN=Txnrd1 PE=1 SV=3	1504	11	C	UR	1332.33	1765.72	4738.56	1173.31	1701.86	837.37	5338.71	1383.91	1183.45	1182.9	1392.18
sp|O70570|PIGR_MOUSE	Pigr	Polymeric immunoglobulin receptor OS=Mus musculus OX=10090 GN=Pigr PE=1 SV=1	1505	18	C	UR	1687.38	2603.15	3157.22	1830.88	2314.62	1326.28	4704	1908.37	1481.93	1820.94	1852.51
sp|P97494|GSH1_MOUSE	Gclc	Glutamate--cysteine ligase catalytic subunit OS=Mus musculus OX=10090 GN=Gclc PE=1 SV=4	1506	8	C	UR	1086.68	851.74	698.771	701.736	1339.38	847.735	1267.01	930.127	595.959	687.042	702.542
sp|Q3UIR3|DTX3L_MOUSE	Dtx3l	E3 ubiquitin-protein ligase DTX3L OS=Mus musculus OX=10090 GN=Dtx3l PE=1 SV=1	1507	12	C	UR	2061.83	1043.62	559.887	1324.13	1141.43	1842.94	418.339	2105.8	2299.24	2145.42	1935.59
sp|Q60928|GGT1_MOUSE	Ggt1	Glutathione hydrolase 1 proenzyme OS=Mus musculus OX=10090 GN=Ggt1 PE=1 SV=1	1508	6	C	UR	368.175	261.06	3301.11	301.945	92.8428	175.509	1989.77	182.255	185.571	186.311	256.305
tr|B2RS76|B2RS76_MOUSE	Cpb1	carboxypeptidase B1 (Tissue) OS=Mus musculus OX=10090 GN=Cpb1 PE=1 SV=1	1509	13	C	UR	90.1991	104.827	9036.53	193.929	13.3025	57.9518	4189.66	86.1748	50.9743	82.999	125.415
sp|Q7TPZ8|CBPA1_MOUSE	Cpa1	Carboxypeptidase A1 OS=Mus musculus OX=10090 GN=Cpa1 PE=1 SV=1	1509	5	C	UR	76.0542	119.871	2068.05	134.534	49.1897	69.6994	1736.5	60.6959	49.2174	69.3453	89.7206
sp|P62918|RL8_MOUSE	Rpl8	60S ribosomal protein L8 OS=Mus musculus OX=10090 GN=Rpl8 PE=1 SV=2	1510	5	C	UR	684.686	1334.79	178.984	1156.13	848.893	673.46	202.263	857.609	875.046	646.51	851.908
sp|Q99K41|EMIL1_MOUSE	Emilin1	EMILIN-1 OS=Mus musculus OX=10090 GN=Emilin1 PE=1 SV=1	1511	10	C	UR	387.076	535.456	429.287	383.565	464.146	1498.15	422.894	422.263	1191.18	1087.69	327.019
sp|Q8C102|GALT5_MOUSE	Galnt5	Polypeptide N-acetylgalactosaminyltransferase 5 OS=Mus musculus OX=10090 GN=Galnt5 PE=2 SV=2	1514	10	C	UR	853.35	765.422	2275.25	758.514	1392.96	868.717	1483.89	862.216	685.761	700.668	978.711
sp|P51859|HDGF_MOUSE	Hdgf	Hepatoma-derived growth factor OS=Mus musculus OX=10090 GN=Hdgf PE=1 SV=2	1515	10	C	UR	1310.6	1470.55	372.955	1305.03	2003.12	1486.79	246.142	2878.53	2367.23	3310.7	2378.23
sp|Q60598|SRC8_MOUSE	Cttn	Src substrate cortactin OS=Mus musculus OX=10090 GN=Cttn PE=1 SV=2	1517	5	C	UR	1010.79	681.539	257.028	940.489	941.945	681.997	121.383	1217.66	1064.7	1309.1	1289.87
sp|Q8R5F3|OARD1_MOUSE	Oard1	ADP-ribose glycohydrolase OARD1 OS=Mus musculus OX=10090 GN=Oard1 PE=1 SV=2	1518	3	C	UR	789.936	539.368	509.451	892.859	533.373	864.081	478.003	761.038	931.721	846.598	637.131
sp|Q8BUV3|GEPH_MOUSE	Gphn	Gephyrin OS=Mus musculus OX=10090 GN=Gphn PE=1 SV=2	1519	10	C	UR	1176.06	1182.52	530.65	988.88	1242.82	907.789	1246.4	1071.29	1007.85	975.391	1102.82
sp|Q7SIG6|ASAP2_MOUSE	Asap2	Arf-GAP with SH3 domain, ANK repeat and PH domain-containing protein 2 OS=Mus musculus OX=10090 GN=Asap2 PE=1 SV=3	1520	2	C	UR	82.708	54.4768	55.4261	58.3693	88.9871	65.3286	47.443	75.2665	73.1977	61.8248	64.1347
sp|P42208|SEPT2_MOUSE	Septin2	Septin-2 OS=Mus musculus OX=10090 GN=Septin2 PE=1 SV=2	1521	8	C	UR	1042.83	692.062	393.198	938.104	1095.13	1843.44	527.497	1141.66	1287.99	1343.54	1112.1
sp|P50516|VATA_MOUSE	Atp6v1a	V-type proton ATPase catalytic subunit A OS=Mus musculus OX=10090 GN=Atp6v1a PE=1 SV=2	1522	12	C	UR	1915.81	1876.51	718.715	1885.56	2570.13	1847.15	506.142	1719.03	1594.23	1531.77	2171.13
sp|P70124|SPB5_MOUSE	Serpinb5	Serpin B5 OS=Mus musculus OX=10090 GN=Serpinb5 PE=1 SV=1	1523	10	C	UR	1118.23	825.522	825.267	786.044	1372.1	847.784	785.589	1594.22	1114.81	1062.13	1702.16
sp|Q09199|B4GN2_MOUSE	B4galnt2	Beta-1,4 N-acetylgalactosaminyltransferase 2 OS=Mus musculus OX=10090 GN=B4galnt2 PE=2 SV=1	1524	7	C	UR	1096.74	590.734	1436.86	927.293	533.336	677.168	842.502	468.893	548.103	483.178	659.383
sp|P10493|NID1_MOUSE	Nid1	Nidogen-1 OS=Mus musculus OX=10090 GN=Nid1 PE=1 SV=2	1525	13	C	UR	944.275	1553.8	5056.01	1141.92	1003.15	2857.45	5556.94	809.15	1378.87	1476.55	706.249
sp|O88544|CSN4_MOUSE	Cops4	COP9 signalosome complex subunit 4 OS=Mus musculus OX=10090 GN=Cops4 PE=1 SV=1	1526	7	C	UR	1247.09	982.807	290.676	1277.53	1711.46	1418.44	174.058	1567.13	1231.1	1302.8	1459.63
sp|Q91V08|CLC2D_MOUSE	Clec2d	C-type lectin domain family 2 member D OS=Mus musculus OX=10090 GN=Clec2d PE=1 SV=1	1527	4	C	UR	377.787	322.761	1094.65	444.398	240.326	563.076	1719.22	472.283	375.011	403.043	379.349
sp|Q99MZ7|PECR_MOUSE	Pecr	Peroxisomal trans-2-enoyl-CoA reductase OS=Mus musculus OX=10090 GN=Pecr PE=1 SV=1	1528	2	C	UR	165.262	257.884	167.008	315.385	247.495	258.726	177.991	301.881	160.222	256.478	199.838
sp|Q8BKG3|PTK7_MOUSE	Ptk7	Inactive tyrosine-protein kinase 7 OS=Mus musculus OX=10090 GN=Ptk7 PE=1 SV=1	1529	11	C	UR	784.889	935.135	719.369	801.815	919.846	1017.09	996.516	849.783	1189.85	997.71	727.43
sp|Q61420|S35A1_MOUSE	Slc35a1	CMP-sialic acid transporter OS=Mus musculus OX=10090 GN=Slc35a1 PE=1 SV=2	1530	4	C	UR	473.939	275.516	900.753	525.26	246.101	556.172	400.016	288.845	268.771	278.753	216.946
sp|Q6PE15|ABHDA_MOUSE	Abhd10	Mycophenolic acid acyl-glucuronide esterase, mitochondrial OS=Mus musculus OX=10090 GN=Abhd10 PE=1 SV=1	1531	4	C	UR	793.834	697.952	278.231	613.872	1053.95	554.237	147.22	655.256	478.793	593.768	756.742
sp|Q8BJD1|ITIH5_MOUSE	Itih5	Inter-alpha-trypsin inhibitor heavy chain H5 OS=Mus musculus OX=10090 GN=Itih5 PE=1 SV=1	1532	3	C	UR	50.4639	60.4486	47.8969	53.289	94.4167	101.889	45.2856	54.598	61.637	54.6517	63.1003
sp|P24527|LKHA4_MOUSE	Lta4h	Leukotriene A-4 hydrolase OS=Mus musculus OX=10090 GN=Lta4h PE=1 SV=4	1533	17	C	UR	1605.3	1581.49	1696.74	1113.77	1968.45	1209.06	2624.87	1299.23	1243.82	1069.24	1467.41
tr|D3YUE4|D3YUE4_MOUSE	Fam151b	Family with sequence similarity 151, member B OS=Mus musculus OX=10090 GN=Fam151b PE=1 SV=1	1534	3	C	UR	88.9824	117.102	187.344	88.7802	125.871	66.1561	203.523	81.6135	75.5439	74.9575	88.3534
sp|P05208|CEL2A_MOUSE	Cela2a	Chymotrypsin-like elastase family member 2A OS=Mus musculus OX=10090 GN=Cela2a PE=1 SV=1	1535	5	C	UR	3.26802	39.3039	962.958	31.1533	9.0252	2.0905	510.39	4.55253	10.8769	10.5509	3.33902
sp|Q9D4H1|EXOC2_MOUSE	Exoc2	Exocyst complex component 2 OS=Mus musculus OX=10090 GN=Exoc2 PE=1 SV=1	1536	5	C	UR	649.472	476.881	965.792	650.167	521.679	659.279	943.592	635.019	609.588	611.388	533.142
sp|Q80XS7|FA83E_MOUSE	Fam83e	Protein FAM83E OS=Mus musculus OX=10090 GN=Fam83e PE=2 SV=2	1538	2	C	UR	323.957	266.457	406.711	273.102	236.37	246.529	431.713	234.468	244.888	211.918	313.99
sp|Q5SWD9|TSR1_MOUSE	Tsr1	Pre-rRNA-processing protein TSR1 homolog OS=Mus musculus OX=10090 GN=Tsr1 PE=1 SV=1	1539	8	C	UR	551.197	598.789	277.499	606.973	534.722	583.286	319.784	695.865	870.635	731.445	655.697
sp|Q9DAU1|CNPY3_MOUSE	Cnpy3	Protein canopy homolog 3 OS=Mus musculus OX=10090 GN=Cnpy3 PE=1 SV=1	1540	2	C	UR	180.336	511.19	267.487	367.23	636.638	167.006	103.606	441.576	534.22	568.256	705.2
sp|Q9D379|HYEP_MOUSE	Ephx1	Epoxide hydrolase 1 OS=Mus musculus OX=10090 GN=Ephx1 PE=1 SV=2	1541	7	C	UR	488.543	564.312	2567.77	608.362	224.394	1076.89	3340.96	331.956	422.728	491.101	297.694
sp|Q9Z0H1|WDR46_MOUSE	Wdr46	WD repeat-containing protein 46 OS=Mus musculus OX=10090 GN=Wdr46 PE=2 SV=1	1542	3	C	UR	153.903	146.777	41.9955	171.118	165.489	132.287	65.791	160.975	200.716	164.321	158.278
tr|B2RU69|B2RU69_MOUSE	Cuzd1	CUB and zona pellucida-like domain-containing protein 1 OS=Mus musculus OX=10090 GN=Cuzd1 PE=1 SV=1	1543	6	C	UR	447.827	562.567	2728.78	417.41	320.686	262.01	2419.05	176.879	416.041	228.618	300.014
sp|P01639|KV5A7_MOUSE	Gm5571	Ig kappa chain V-V region MOPC 41 OS=Mus musculus OX=10090 GN=Gm5571 PE=1 SV=1	1544	5	C	UR	379.022	797.554	593.345	281.962	187.344	586.8	3693.21	420.392	717.719	900.264	323.179
tr|A0A140T8N5|A0A140T8N5_MOUSE	Igkv6-23	Immunoglobulin kappa variable 6-23 (Fragment) OS=Mus musculus OX=10090 GN=Igkv6-23 PE=4 SV=2	1546	1	C	UR	39.9618	43.8408	126.182	49.3619	59.7652	44.0055	175.32	59.8039	27.8206	38.1537	25.4281
tr|A0A140T8M5|A0A140T8M5_MOUSE	Igkv6-15	Immunoglobulin kappa variable 6-15 (Fragment) OS=Mus musculus OX=10090 GN=Igkv6-15 PE=1 SV=2	1546	1	C	UR	147.397	49.384	254.911	69.6667	220.832	56.6184	467.095	107.945	79.8725	106.56	105.226
sp|Q5DTM8|BRE1A_MOUSE	Rnf20	E3 ubiquitin-protein ligase BRE1A OS=Mus musculus OX=10090 GN=Rnf20 PE=1 SV=2	1547	5	C	UR	235.713	169.663	128.433	251.299	420.086	360.751	127.503	848.221	716.315	1013.51	664.455
tr|F8VQM0|F8VQM0_MOUSE	Akp3	Alkaline phosphatase OS=Mus musculus OX=10090 GN=Akp3 PE=1 SV=1	1548	11	C	UR	1376.77	1420.57	1553.82	1065.22	498.683	808.073	1910.94	1054.91	1684.6	643.252	1304.57
tr|F8VPQ6|F8VPQ6_MOUSE	Alpi	Alkaline phosphatase OS=Mus musculus OX=10090 GN=Alpi PE=1 SV=1	1548	4	C	UR	125.079	73.2349	38.6362	73.0071	55.0215	48.0023	65.9557	58.883	86.5669	51.8152	82.4397
sp|Q9Z0Z4|HEPH_MOUSE	Heph	Hephaestin OS=Mus musculus OX=10090 GN=Heph PE=1 SV=3	1549	14	C	UR	2275.13	2623.64	903.744	1644.86	2532.61	1264.6	729.56	1924.01	1261.54	1497.88	1992.34
sp|Q9D7T1|REP15_MOUSE	Rep15	Rab15 effector protein OS=Mus musculus OX=10090 GN=Rep15 PE=2 SV=1	1550	5	C	UR	388.062	427.391	822.712	446.349	527.326	381.905	334.806	314.504	468.255	282.888	477.259
sp|P24270|CATA_MOUSE	Cat	Catalase OS=Mus musculus OX=10090 GN=Cat PE=1 SV=4	1551	10	C	UR	1078.02	705.579	733.036	733.546	745.325	469.369	1269.11	561.059	450.945	485.775	611.961
tr|A0A0B4J1J2|A0A0B4J1J2_MOUSE	Igkv5-43	Immunoglobulin kappa chain variable 5-43 (Fragment) OS=Mus musculus OX=10090 GN=Igkv5-43 PE=1 SV=1	1552	1	C	UR	1.76759	8.57773	51.9419	11.1984	10.9523	3.17085	41.4382	14.0978	13.0308	22.3067	6.36296
sp|Q8C0J6|SWAHC_MOUSE	Sowahc	Ankyrin repeat domain-containing protein SOWAHC OS=Mus musculus OX=10090 GN=Sowahc PE=1 SV=2	1553	3	C	UR	810.058	773.536	618.524	945.251	1067.51	1520.67	538.196	1217.03	937.699	1095.17	1069.4
sp|P97311|MCM6_MOUSE	Mcm6	DNA replication licensing factor MCM6 OS=Mus musculus OX=10090 GN=Mcm6 PE=1 SV=1	1554	4	C	UR	260.307	181.339	113.937	229.726	276.474	367.612	80.138	416.583	434.82	376.938	332.459
sp|Q91W86|VPS11_MOUSE	Vps11	Vacuolar protein sorting-associated protein 11 homolog OS=Mus musculus OX=10090 GN=Vps11 PE=1 SV=3	1555	5	C	UR	508.085	250.16	354.254	422.095	390.205	937.844	230.707	672.968	709.653	787.356	643.293
sp|Q9WV32|ARC1B_MOUSE	Arpc1b	Actin-related protein 2/3 complex subunit 1B OS=Mus musculus OX=10090 GN=Arpc1b PE=1 SV=4	1556	7	C	UR	1454.59	1081.96	995.471	1116.6	1519.54	1153.99	882.537	1225.46	1082.08	1007.56	1559.57
sp|Q9R0Q6|ARC1A_MOUSE	Arpc1a	Actin-related protein 2/3 complex subunit 1A OS=Mus musculus OX=10090 GN=Arpc1a PE=1 SV=1	1556	1	C	UR	341.108	374.564	188.598	355.905	419.296	447.471	204.406	323.735	277.548	260.253	323.643
tr|A0A0J9YUD5|A0A0J9YUD5_MOUSE	Nup205	Nucleoporin 205 OS=Mus musculus OX=10090 GN=Nup205 PE=1 SV=1	1557	9	C	UR	892.682	751.747	553.672	1223.12	483.246	1241.8	466.457	703.915	1130.14	942.936	672.239
tr|Q3UKR0|Q3UKR0_MOUSE	Daxx	Death domain-associated protein 6 OS=Mus musculus OX=10090 GN=Daxx PE=1 SV=1	1558	2	C	UR	36.841	42.4707	12.3848	35.8415	43.5557	25.4132	8.57568	59.4633	49.4547	63.809	51.41
sp|Q91YQ5|RPN1_MOUSE	Rpn1	Dolichyl-diphosphooligosaccharide--protein glycosyltransferase subunit 1 OS=Mus musculus OX=10090 GN=Rpn1 PE=1 SV=1	1559	14	C	UR	2566.32	2532.1	1525.24	2765.92	843.867	2591.23	1417.94	1127.63	2272.48	1847.74	1344.2
sp|Q62448|IF4G2_MOUSE	Eif4g2	Eukaryotic translation initiation factor 4 gamma 2 OS=Mus musculus OX=10090 GN=Eif4g2 PE=1 SV=2	1560	4	C	UR	474.836	301.905	267.207	485.891	375.946	660.557	226.187	503.898	505.594	482.348	397.453
sp|Q0KK55|KNDC1_MOUSE	Kndc1	Kinase non-catalytic C-lobe domain-containing protein 1 OS=Mus musculus OX=10090 GN=Kndc1 PE=1 SV=2	1563	1	C	UR	23.5071	30.04	93.6346	40.7576	25.3916	17.7111	74.1846	16.8114	30.6078	43.6698	32.6953
sp|Q62074|KPCI_MOUSE	Prkci	Protein kinase C iota type OS=Mus musculus OX=10090 GN=Prkci PE=1 SV=3	1564	3	C	UR	124.617	92.2535	118.795	170.539	155.469	123.067	86.6619	141.561	147.359	115.954	171.248
sp|Q02956|KPCZ_MOUSE	Prkcz	Protein kinase C zeta type OS=Mus musculus OX=10090 GN=Prkcz PE=1 SV=2	1564	1	C	UR	104.246	61.6215	95.7899	99.5208	73.309	100.859	111.482	61.8798	78.9674	74.3158	85.4781
sp|Q07417|ACADS_MOUSE	Acads	Short-chain specific acyl-CoA dehydrogenase, mitochondrial OS=Mus musculus OX=10090 GN=Acads PE=1 SV=2	1566	12	C	UR	2579.12	2852.79	575.289	2658.07	2009.41	1937.79	501.503	1813.12	1557.87	2175.44	1798.11
sp|P97816|S100G_MOUSE	S100g	Protein S100-G OS=Mus musculus OX=10090 GN=S100g PE=1 SV=3	1567	1	C	UR	314.176	408.492	56.1286	120.842	166.154	163.797	61.0096	159.441	322.218	360.265	131.474
sp|Q9DCT8|CRIP2_MOUSE	Crip2	Cysteine-rich protein 2 OS=Mus musculus OX=10090 GN=Crip2 PE=1 SV=1	1568	1	C	UR	7.77311	9.88376	12.3402	9.30665	5.24765	19.8776	5.63484	16.3041	19.1519	32.0102	11.8772
tr|A0A140LJ04|A0A140LJ04_MOUSE	Zzef1	Zinc finger ZZ-type and EF-hand domain-containing protein 1 OS=Mus musculus OX=10090 GN=Zzef1 PE=1 SV=1	1569	13	C	UR	1322.45	933.76	2155.97	1161.82	786.317	1363.54	1575.67	1075.33	1084.68	1051.39	983.955
sp|P61022|CHP1_MOUSE	Chp1	Calcineurin B homologous protein 1 OS=Mus musculus OX=10090 GN=Chp1 PE=1 SV=2	1570	6	C	UR	1092.4	543.864	798.624	797.742	637.92	729.74	914.622	590.765	508.07	539.183	601.316
sp|Q9Z2X2|PSD10_MOUSE	Psmd10	26S proteasome non-ATPase regulatory subunit 10 OS=Mus musculus OX=10090 GN=Psmd10 PE=1 SV=3	1571	5	C	UR	1287.12	1312.69	763.426	1047.29	1247.5	794.17	1131.81	844.448	921.19	1005.83	1178.18
sp|Q61733|RT31_MOUSE	Mrps31	28S ribosomal protein S31, mitochondrial OS=Mus musculus OX=10090 GN=Mrps31 PE=1 SV=1	1572	3	C	UR	877.404	943.15	867.138	1185.05	1068.88	738.308	325.814	964.712	770.594	821.478	1084.4
sp|Q6A026|PDS5A_MOUSE	Pds5a	Sister chromatid cohesion protein PDS5 homolog A OS=Mus musculus OX=10090 GN=Pds5a PE=1 SV=3	1572	10	C	UR	1745.76	928.397	832.068	1732.22	1108.26	2423.45	759.524	2031.43	1874.65	1878.39	1426.49
sp|Q4VA53-3|PDS5B_MOUSE	Pds5b	Isoform 3 of Sister chromatid cohesion protein PDS5 homolog B OS=Mus musculus OX=10090 GN=Pds5b	1572	11	C	UR	1492.89	1084.72	807.03	1754.97	1184.49	2839.97	642.652	1628.97	1837.72	1738.32	1513.52
tr|Q3UW98|Q3UW98_MOUSE	Clca4b	Chloride channel accessory 4B OS=Mus musculus OX=10090 GN=Clca4b PE=1 SV=1	1573	13	C	UR	927.662	1605.76	5069.51	1490.04	853.28	651.02	5106.53	2166.43	1229.01	914.383	3468.1
tr|A0A5F8MQB6|A0A5F8MQB6_MOUSE	Clca4a	Calcium-activated chloride channel regulator 4A OS=Mus musculus OX=10090 GN=Clca4a PE=1 SV=1	1573	9	C	UR	1549.47	2261.11	4148.93	1301.55	1149.6	397.855	2996.23	856.676	767.595	759.277	1873.81
sp|Q9JI78|NGLY1_MOUSE	Ngly1	Peptide-N(4)-(N-acetyl-beta-glucosaminyl)asparagine amidase OS=Mus musculus OX=10090 GN=Ngly1 PE=1 SV=2	1574	9	C	UR	821.848	975.504	397.822	913.908	814.742	720.753	285.996	771.159	706.124	691.479	773.982
sp|A2A6Q5-3|CDC27_MOUSE	Cdc27	Isoform 3 of Cell division cycle protein 27 homolog OS=Mus musculus OX=10090 GN=Cdc27	1575	4	C	UR	253.28	230.596	126.165	293.336	287.187	316.824	98.2025	350.966	495.977	486.385	528.324
sp|P70429|EVL_MOUSE	Evl	Ena/VASP-like protein OS=Mus musculus OX=10090 GN=Evl PE=1 SV=2	1576	3	C	UR	144.562	164.408	89.4028	155.897	147.068	329.231	158.976	187.09	333.078	262.074	164.912
sp|Q4U2R1|HERC2_MOUSE	Herc2	E3 ubiquitin-protein ligase HERC2 OS=Mus musculus OX=10090 GN=Herc2 PE=1 SV=3	1577	8	C	UR	569.142	537.391	422.866	651.471	319.58	524.309	447.62	403.115	550.53	420.948	416.28
sp|Q9DD18|DTD1_MOUSE	Dtd1	D-aminoacyl-tRNA deacylase 1 OS=Mus musculus OX=10090 GN=Dtd1 PE=1 SV=2	1578	1	C	UR	28.3948	42.1178	104.524	30.5185	42.6144	23.9031	124.966	39.6721	28.9874	29.4751	32.218
sp|Q91YX0|THMS2_MOUSE	Themis2	Protein THEMIS2 OS=Mus musculus OX=10090 GN=Themis2 PE=1 SV=2	1579	2	C	UR	26.4818	17.7818	21.7158	44.1902	21.5973	101.74	25.1152	54.4738	153.788	128.235	47.9481
sp|P70245|EBP_MOUSE	Ebp	3-beta-hydroxysteroid-Delta(8),Delta(7)-isomerase OS=Mus musculus OX=10090 GN=Ebp PE=1 SV=3	1580	1	C	UR	155.911	170.6	484.454	159.795	17.6993	144.742	445.657	52.0869	125.621	69.4775	51.9578
sp|Q6P6M7|SPCS_MOUSE	Sepsecs	O-phosphoseryl-tRNA(Sec) selenium transferase OS=Mus musculus OX=10090 GN=Sepsecs PE=1 SV=2	1581	6	C	UR	1234.29	1310.26	2155.19	1270.99	1606.39	947.99	2086.48	1152.62	1020	820.811	1492.82
sp|Q8BKC5|IPO5_MOUSE	Ipo5	Importin-5 OS=Mus musculus OX=10090 GN=Ipo5 PE=1 SV=3	1582	9	C	UR	548.004	911.805	647.89	816.301	706.708	901.02	555.36	801.375	1398.28	930.295	769.303
sp|Q8VEE4|RFA1_MOUSE	Rpa1	Replication protein A 70 kDa DNA-binding subunit OS=Mus musculus OX=10090 GN=Rpa1 PE=1 SV=1	1583	4	C	UR	178.694	195.08	110.995	212.515	228.576	193.603	74.9225	242.736	271.515	248.449	205.993
sp|Q8CEI1|BOLA3_MOUSE	Bola3	BolA-like protein 3 OS=Mus musculus OX=10090 GN=Bola3 PE=1 SV=1	1584	3	C	UR	275.432	293.706	75.4282	252.518	231.958	256.779	70.2122	274.22	327.526	333.875	344.817
sp|O55201|SPT5H_MOUSE	Supt5h	Transcription elongation factor SPT5 OS=Mus musculus OX=10090 GN=Supt5h PE=1 SV=1	1585	7	C	UR	798.849	776.784	231.807	692.618	656.696	908.781	234.052	802.638	793.24	814.67	727.423
sp|Q9JJT0|RCL1_MOUSE	Rcl1	RNA 3'-terminal phosphate cyclase-like protein OS=Mus musculus OX=10090 GN=Rcl1 PE=2 SV=1	1586	2	C	UR	357.608	356.826	122.276	520.275	544.608	431.42	121.999	575.412	677.479	513.221	525.075
sp|O70628|PDE9A_MOUSE	Pde9a	High affinity cGMP-specific 3',5'-cyclic phosphodiesterase 9A OS=Mus musculus OX=10090 GN=Pde9a PE=1 SV=1	1587	7	C	UR	1244	890.546	999.907	964.063	1181.99	892.117	1135.77	1270.53	679.063	701.008	1358.03
tr|E9PYG6|E9PYG6_MOUSE	Rasa1	RAS p21 protein activator 1 OS=Mus musculus OX=10090 GN=Rasa1 PE=1 SV=1	1588	2	C	UR	324.399	227.356	87.0457	377.903	214.014	461.296	76.3502	336.467	360.39	383.523	297.998
sp|Q8BJW6|EIF2A_MOUSE	Eif2a	Eukaryotic translation initiation factor 2A OS=Mus musculus OX=10090 GN=Eif2a PE=1 SV=2	1589	8	C	UR	1537.78	1348.22	514.361	1445.42	1937.02	1636.81	727.975	2111.94	1739.46	1606.9	1532.12
sp|Q8R138|TM119_MOUSE	Tmem119	Transmembrane protein 119 OS=Mus musculus OX=10090 GN=Tmem119 PE=1 SV=1	1590	2	C	UR	111.221	102.738	210.286	142.067	100.616	202.666	90.6615	167.815	360.749	275.574	114.316
sp|Q9R1P0|PSA4_MOUSE	Psma4	Proteasome subunit alpha type-4 OS=Mus musculus OX=10090 GN=Psma4 PE=1 SV=1	1592	8	C	UR	997.047	1518.24	2409.49	939.008	1435.17	766.96	3089.75	1166.57	1055.43	903.667	995.136
sp|Q3U0B3|DHR11_MOUSE	Dhrs11	Dehydrogenase/reductase SDR family member 11 OS=Mus musculus OX=10090 GN=Dhrs11 PE=1 SV=1	1593	5	C	UR	849.031	1139.87	217.449	657.897	1475.82	750.697	146.94	1164.97	850.511	1012.45	1066.59
sp|Q61702|ITIH1_MOUSE	Itih1	Inter-alpha-trypsin inhibitor heavy chain H1 OS=Mus musculus OX=10090 GN=Itih1 PE=1 SV=2	1594	11	C	UR	750.038	808.403	903.82	642.427	710.422	854.017	1276.39	779.211	1130.7	1228.86	1092.38
sp|Q80VA0-2|GALT7_MOUSE	Galnt7	Isoform 2 of N-acetylgalactosaminyltransferase 7 OS=Mus musculus OX=10090 GN=Galnt7	1595	11	C	UR	2608.79	1963.17	2685.66	2386.8	2526.92	2187.36	2854.28	1437.72	1229.26	1252.66	1764.74
sp|Q923B1|DBR1_MOUSE	Dbr1	Lariat debranching enzyme OS=Mus musculus OX=10090 GN=Dbr1 PE=1 SV=2	1596	4	C	UR	304.658	256.2	158.106	286.002	343.587	302.873	124.986	359.434	305.02	284.163	315.352
sp|Q9EP69|SAC1_MOUSE	Sacm1l	Phosphatidylinositol-3-phosphatase SAC1 OS=Mus musculus OX=10090 GN=Sacm1l PE=1 SV=1	1597	11	C	UR	2364.26	1799.65	972.748	2679.63	622.872	2501.04	1443.85	1268.08	2082.08	1757.92	1253.41
sp|Q9D7X3|DUS3_MOUSE	Dusp3	Dual specificity protein phosphatase 3 OS=Mus musculus OX=10090 GN=Dusp3 PE=1 SV=1	1598	2	C	UR	286.243	183.749	146.462	278.265	139.518	685.753	95.7954	261.913	333.58	429.895	214.333
sp|Q8JZV7|NAGA_MOUSE	Amdhd2	N-acetylglucosamine-6-phosphate deacetylase OS=Mus musculus OX=10090 GN=Amdhd2 PE=1 SV=1	1599	5	C	UR	714.148	797.736	303.716	569.98	755.195	411.191	481.914	477.633	397.56	420.092	544.849
sp|O08912|GALT1_MOUSE	Galnt1	Polypeptide N-acetylgalactosaminyltransferase 1 OS=Mus musculus OX=10090 GN=Galnt1 PE=1 SV=1	1600	6	C	UR	314.882	284.384	600.801	275.498	233.118	196.341	811.179	149.624	143.01	155.185	199.042
sp|O54724|CAVN1_MOUSE	Cavin1	Caveolae-associated protein 1 OS=Mus musculus OX=10090 GN=Cavin1 PE=1 SV=1	1601	7	C	UR	579.093	701.566	561.293	484.21	538.372	2707.4	553.253	494.835	1129.35	1352.92	354.807
sp|P70195|PSB7_MOUSE	Psmb7	Proteasome subunit beta type-7 OS=Mus musculus OX=10090 GN=Psmb7 PE=1 SV=1	1602	5	C	UR	307.021	419.178	169.704	263.043	383.466	229.05	181.119	290.796	191.47	230.501	255.611
sp|Q9Z2X1|HNRPF_MOUSE	Hnrnpf	Heterogeneous nuclear ribonucleoprotein F OS=Mus musculus OX=10090 GN=Hnrnpf PE=1 SV=3	1603	3	C	UR	168.936	99.3289	9.05459	137.593	116.23	187.096	14.9451	139.574	165.916	149.756	168.679
tr|D3Z3N4|D3Z3N4_MOUSE	Hnrnph3	Heterogeneous nuclear ribonucleoprotein H3 OS=Mus musculus OX=10090 GN=Hnrnph3 PE=1 SV=1	1603	3	C	UR	291.282	281.033	34.7116	172.889	223.16	212.91	96.404	260.897	168.579	153.223	160.502
sp|P70333|HNRH2_MOUSE	Hnrnph2	Heterogeneous nuclear ribonucleoprotein H2 OS=Mus musculus OX=10090 GN=Hnrnph2 PE=1 SV=1	1603	4	C	UR	792.545	660.613	160.897	500.299	579.314	836.467	127.163	799.567	1048.26	1016.11	821.652
sp|Q9Z2B5|E2AK3_MOUSE	Eif2ak3	Eukaryotic translation initiation factor 2-alpha kinase 3 OS=Mus musculus OX=10090 GN=Eif2ak3 PE=1 SV=1	1604	2	C	UR	352.554	341.17	225.998	393.693	467.868	430.925	211.589	394.079	446.179	414.414	456.138
sp|Q80YD1|SUV3_MOUSE	Supv3l1	ATP-dependent RNA helicase SUPV3L1, mitochondrial OS=Mus musculus OX=10090 GN=Supv3l1 PE=1 SV=1	1605	7	C	UR	1123.01	1197.34	1925.54	1326.19	646.712	1056.49	955.739	813.112	1018.09	956.229	807.694
sp|Q8VI75|IPO4_MOUSE	Ipo4	Importin-4 OS=Mus musculus OX=10090 GN=Ipo4 PE=1 SV=1	1606	3	C	UR	133.312	103.638	162.661	135.959	149.861	190.904	122.609	152.864	145.257	149.694	131.676
tr|Q925P3|Q925P3_MOUSE	Ceacam1	CEA-related cell adhesion molecule 1 OS=Mus musculus OX=10090 GN=Ceacam1 PE=1 SV=1	1607	1	C	UR	83.0483	128.534	62.7085	98.5471	101.692	53.3247	49.1354	91.1344	87.7607	75.877	144.471
sp|P31809-2|CEAM1_MOUSE	Ceacam1	Isoform 2 of Carcinoembryonic antigen-related cell adhesion molecule 1 OS=Mus musculus OX=10090 GN=Ceacam1	1607	5	C	UR	512.786	430.453	924.463	395.321	407.337	366.181	1091.53	350.095	296.408	331.183	438.659
sp|O09159|MA2B1_MOUSE	Man2b1	Lysosomal alpha-mannosidase OS=Mus musculus OX=10090 GN=Man2b1 PE=1 SV=4	1608	9	C	UR	1423.99	1927.4	5110.41	1474.63	2253.01	1133.13	4670.55	1360.25	1193.98	1363.22	1234.28
sp|Q8C167|PPCEL_MOUSE	Prepl	Prolyl endopeptidase-like OS=Mus musculus OX=10090 GN=Prepl PE=1 SV=1	1609	6	C	UR	701.36	1005.78	1033.68	684.063	969.779	661.194	1399.54	762.917	691.321	566.224	741.567
sp|Q9WUR2|ECI2_MOUSE	Eci2	Enoyl-CoA delta isomerase 2 OS=Mus musculus OX=10090 GN=Eci2 PE=1 SV=2	1610	6	C	UR	1164.08	959.43	373.411	922.88	1073.12	641.817	145.654	892.812	794.415	867.898	1164.42
sp|Q78JN3|ECI3_MOUSE	Eci3	Enoyl-CoA delta isomerase 3, peroxisomal OS=Mus musculus OX=10090 GN=Eci3 PE=1 SV=1	1610	2	C	UR	64.7436	41.7622	3.19843	47.7438	40.3419	32.9896	0	25.8366	30.6468	27.8005	33.5933
sp|Q6NTA4|RRAGB_MOUSE	Rragb	Ras-related GTP-binding protein B OS=Mus musculus OX=10090 GN=Rragb PE=1 SV=1	1611	3	C	UR	673.048	557.684	256.062	644.698	599.115	823.49	329.488	508.019	658.179	568.465	632.364
sp|G5E8K5|ANK3_MOUSE	Ank3	Ankyrin-3 OS=Mus musculus OX=10090 GN=Ank3 PE=1 SV=1	1612	7	C	UR	1090.51	1697.82	169.828	934.695	1294.04	760.341	115.619	1039.74	982.407	1027.8	884.063
sp|Q8C8R3-4|ANK2_MOUSE	Ank2	Isoform 4 of Ankyrin-2 OS=Mus musculus OX=10090 GN=Ank2	1612	1	C	UR	88.1983	121.007	17.1885	116.908	80.5072	108.392	30.6203	113.601	116.934	140.452	137.345
sp|Q8JZQ2|AFG32_MOUSE	Afg3l2	AFG3-like protein 2 OS=Mus musculus OX=10090 GN=Afg3l2 PE=1 SV=1	1612	8	C	UR	1053.32	975.291	1305.58	1057.01	508.787	1002.51	316.283	853.518	911.796	1222.38	1010.5
[truncated: 4,062 more rows]

## Sheet: no contaminants, grouped
Protein Id	Gene Symbol	Description	Group ID	Number of peptides	Collapsed	Parsimony	2745 wt	2786 wt	2788 wt	2789 wt	2790 wt	2741 KO	2742 KO	2743 KO	2744 KO	2785 KO	2787 KO	FC	ttest
[truncated: 5,966 more rows]

[truncated: 1 more sheets:  volcano]
